# Supplementary material for: Genomic Positional Dissection of RNA Editomes in Tumor and Normal Samples
Source: Front Genet. 2019 Mar 20;10:211. doi: 10.3389/fgene.2019.00211 (PMC6435843; doi:10.3389/fgene.2019.00211)
Supplement: FIGURE S1 — Histogram of shared RNA editing sites across multiple cancers filtered by four different average RNA editing level: A > 0%, B > 10%, C > 25%, D > 50%. Majority of the RNA editing sites occurs only in 1 or 2 cancers. [file Data_Sheet_1.ZIP]

Archive with 11 entries (11 files):
- FigureS1_hist_by_editing_level.jpg
- FigureS2.jpg
- FigureS3_pieChartSideBySide.jpg
- FigureS4_manhattan.jpg
- FigureS5.jpg
- SupplementaryTable1.csv
- SupplementaryTable2.xlsx
- SupplementaryTable3.xlsx
- SupplementaryTable4.xlsx
- SupplementaryTable5.xlsx
- SupplementaryTable6.xlsx
