# Supplementary material for: Genomic Positional Dissection of RNA Editomes in Tumor and Normal Samples
Source: Front Genet. 2019 Mar 20;10:211. doi: 10.3389/fgene.2019.00211 (PMC6435843; doi:10.3389/fgene.2019.00211)
Supplement: FIGURE S1 — Histogram of shared RNA editing sites across multiple cancers filtered by four different average RNA editing level: A > 0%, B > 10%, C > 25%, D > 50%. Majority of the RNA editing sites occurs only in 1 or 2 cancers. [file Data_Sheet_1.ZIP › SupplementaryTable1.csv]

Table S1. All RNA editing positions across the 14 cancer types examined
gene	strand	Alu	Conserve	blca_p_value	blca_mean_tumor	blca_mean_normal	brca_p_value	brca_mean_tumor	brca_mean_normal	cesc_p_value	cesc_mean_tumor	cesc_mean_normal	hnsc_p_value	hnsc_mean_tumor	hnsc_mean_normal	kich_p_value	kich_mean_tumor	kich_mean_normal	kirc_p_value	kirc_mean_tumor	kirc_mean_normal	kirp_p_value	kirp_mean_tumor	kirp_mean_normal	lihc_p_value	lihc_mean_tumor	lihc_mean_normal	luad_p_value	luad_mean_tumor	luad_mean_normal	lusc_p_value	lusc_mean_tumor	lusc_mean_normal	prad_p_value	prad_mean_tumor	prad_mean_normal	stad_p_value	stad_mean_tumor	stad_mean_normal	thca_p_value	thca_mean_tumor	thca_mean_normal	ucec_p_value	ucec_mean_tumor	ucec_mean_normal
DBT	-	Alu	rhesus	0.745690116	0.037874191	0.052185723	0.238274571	0.066300264	0.079255708	0.038101707	0.04325442	0.089178321	0.386244623	0.056579872	0.042623449	0.005175586	0.03756362	0.062334325	0.064857593	0.067360485	0.074324324	0.056594871	0.060210762	0.069803924	0.04617102	0.041458564	0.047290347	0.530587351	0.046447868	0.042736404	0.6366854	0.057274661	0.061918276	0.008956662	0.048567028	0.065339122	0.575579359	0.072246348	0.057680524	0.166681496	0.056274357	0.06343083	0.719499844	0.020003301	0.041666667
DBT	-	Alu	no-conserve	0.104297158	0.011609766	0.005288164	0.86472392	0.015422982	0.016100521	0.34912868	0.011818511	0.016066589	0.692747529	0.018373797	0.013665783	0.444792598	0.010107135	0.010949646	0.019597574	0.017012234	0.016060676	0.147260417	0.01520925	0.014683147	0.188409962	0.011474058	0.012493266	0.2709834	0.011519024	0.014990827	0.158432735	0.010675048	0.004663436	0.671988995	0.011032705	0.011066951	0.293227989	0.024304833	0.018514769	0.481213107	0.011142969	0.010955969	0.884480668	0.013124153	0.011363636
DFFA	-	Alu	rhesus	0.438553241	0.049967567	0.051395112	0.062689832	0.059555444	0.046710903	0.478437702	0.051759024	0.029448622	0.01638102	0.054334685	0.036980855	0.002790622	0.035344872	0.06022965	0.422590371	0.054666445	0.053474301	0.34654197	0.047495801	0.052598279	0.015687952	0.047756848	0.029290393	0.097149019	0.05623547	0.04468961	0.865469254	0.05874266	0.058512905	0.22494996	0.045938039	0.054337146	0.086477684	0.066425477	0.05166608	0.358628471	0.0456979	0.041041192	0.453462332	0.035240763	0.050366301
DFFA	-	Alu	chimp	0.600294061	0.126371064	0.119468328	0.821398229	0.123466223	0.124031293	0.514530972	0.12236676	0.137191427	0.016103095	0.118214389	0.092250237	0.000748129	0.078025037	0.120460017	0.214266041	0.136516225	0.12415833	0.217818133	0.109527132	0.119158117	0.000111937	0.116137171	0.051311905	0.08182863	0.137225217	0.113879385	0.433017772	0.122281075	0.128512242	0.405899286	0.122470224	0.128310737	0.729906937	0.145379269	0.137190676	0.59563731	0.113743997	0.113706124	0.569238118	0.114017911	0.142424243
DFFA	-	Alu	no-conserve	0.405149335	0.090214824	0.081495521	0.003002836	0.093740052	0.072625644	0.313378439	0.099692786	0.053571429	0.000392355	0.103477263	0.060282798	0.056315054	0.068876005	0.095254972	0.001152974	0.084343188	0.10390458	0.284060691	0.084265209	0.090457204	0.087351508	0.076351819	0.056718663	0.003141561	0.095432047	0.071844845	0.022555269	0.102274052	0.068064336	0.723927082	0.09160568	0.093297248	3.23E-06	0.127097957	0.068768176	0.759742506	0.093473467	0.091327517	0.480611559	0.091262409	0.056433637
DFFA	-	Alu	no-conserve	0.906313329	0.07493767	0.09241081	0.000161486	0.07805546	0.05352861	0.517857351	0.080101564	0.053571429	0.000368937	0.08397461	0.052588562	0.001794439	0.065069461	0.100574378	0.085204877	0.074857414	0.081774526	0.114651512	0.072272052	0.082459827	0.07832998	0.062774824	0.05359179	0.143748564	0.081656435	0.068385579	0.287332244	0.079946901	0.064510752	0.264158096	0.073346657	0.079200788	6.77E-05	0.114219347	0.062338942	0.226433972	0.076171461	0.087688994	0.574262134	0.086918847	0.056072429
DFFA	-	Alu	chimp	0.213585499	0.014982893	0.009924888	0.040926951	0.024504138	0.014251703	0.433401672	0.018310402	0.004901961	0.156890953	0.018476592	0.011206288	0.08374979	0.010942282	0.017664519	0.473993326	0.018549368	0.017522353	0.108825669	0.018564873	0.018197355	0.00367441	0.016984508	0.004967033	0.03724303	0.022503085	0.015551883	0.48546037	0.017239747	0.019745234	0.077632318	0.015246284	0.01786018	0.014170405	0.037884971	0.027474388	0.453921675	0.017519852	0.012029557	0.512277419	0.024796598	0.009615385
DFFA	-	Alu	no-conserve	0.001582574	0.042558917	0.012354466	0.007104916	0.049765462	0.034614859	0.429236277	0.044168871	0.025	0.000155161	0.050482184	0.024133256	0.600343775	0.025455693	0.026366328	0.538708942	0.038901396	0.034290874	0.25656947	0.030247153	0.03289739	0.285848447	0.035076852	0.028563861	0.691365902	0.040025387	0.038156555	0.113891787	0.038673934	0.023214994	0.595786542	0.032058535	0.023925742	1.34E-05	0.079528325	0.037369567	0.428366319	0.03830153	0.030148272	0.864110683	0.051683764	0.052101968
DFFA	-	Alu	chimp	0.684160048	0.202466832	0.225576939	0.207590991	0.184547339	0.173863165	0.047650847	0.173434448	0.289133473	0.000132512	0.202592594	0.151789039	0.001154515	0.143258568	0.196037797	0.004712169	0.198550208	0.171116793	0.800545933	0.176204443	0.173584928	0.005520166	0.129078917	0.071285029	0.104537831	0.184219919	0.158214775	0.575492748	0.193692168	0.202515602	0.018594445	0.207085092	0.234211704	0.371821982	0.303248868	0.280769211	0.000659869	0.188234868	0.145786077	0.660790094	0.177139678	0.193873213
DFFA	-	Alu	no-conserve	0.973715104	0.016555664	0.014546389	0.239965903	0.021115137	0.012923775	0.14055489	0.01995578	0	0.254728884	0.022153129	0.013927869	0.224858462	0.012955787	0.015850408	0.716676278	0.020593238	0.017358461	0.001107896	0.015662317	0.030866255	0.631068118	0.021647064	0.017758703	0.293621541	0.019865951	0.017643633	0.816735231	0.020481727	0.024264383	0.020184849	0.011020048	0.014060256	0.015348708	0.023922087	0.013954345	0.199024246	0.019554594	0.013144079	0.235558492	0.014394998	0
DFFA	-	Alu	both	0.347223171	0.156002907	0.134227296	5.55E-15	0.183332624	0.104734251	0.357449061	0.160988016	0.103341103	8.88E-06	0.173977143	0.112105072	0.000739384	0.104276102	0.153664545	0.885821317	0.159090903	0.155893894	0.000357348	0.124829976	0.178226613	0.038895198	0.123887381	0.081898268	0.000167106	0.171476379	0.112509515	0.292763546	0.17275188	0.19141516	0.117719766	0.134164781	0.149245849	0.000993491	0.23490508	0.165702181	0.162321838	0.156774448	0.141073499	0.499409114	0.145527244	0.173780488
DFFA	-	Alu	both	0.005576199	0.061167594	0.116515923	0.000112932	0.065988755	0.087542731	0.007348435	0.049710212	0.214285714	0.596960149	0.082668872	0.087287944	0.013710336	0.074585016	0.105205162	0.068677981	0.093950978	0.106650651	0.0006769	0.08004316	0.119018829	0.100690242	0.03761181	0.031524064	0.418427709	0.057883904	0.069801927	0.00146158	0.067572011	0.128433297	0.020160106	0.12385531	0.14893078	0.520350395	0.111742035	0.126816769	0.123022791	0.077546944	0.062786075	0.005634376	0.06201092	0.201004168
DFFA	-	Alu	both	0.964873123	0.280358997	0.29488813	0.008740018	0.296277213	0.26684446	0.776905616	0.27910827	0.263382816	0.000751297	0.273443976	0.201947086	0.013266944	0.255687628	0.302515907	0.009660851	0.251090402	0.307607445	0.779382946	0.247914936	0.263209387	0.001993605	0.141308155	0.058707071	0.078800872	0.295671257	0.247109719	0.005749438	0.248554841	0.324072028	0.026736417	0.253449354	0.314447726	0.114484206	0.312534216	0.257501179	0.010510486	0.298744771	0.259401603	0.119958152	0.166741633	0.32433989
DFFA	-	Alu	both	0.350135614	0.078671174	0.06720067	0.111774375	0.091819286	0.075975818	0.791181298	0.081994127	0.083333333	0.347486913	0.069211194	0.056797884	0.159442505	0.06196457	0.078284371	0.179824162	0.078115206	0.083176743	0.006186067	0.06075482	0.091261475	0.087448439	0.054345537	0.034012767	0.006544553	0.084153802	0.057548447	0.601253413	0.087883795	0.098588162	0.137054926	0.073306954	0.083640977	0.001438317	0.09175451	0.05604887	0.280870614	0.083469694	0.072093496	0.119905462	0.047276169	0.095935315
DFFA	-	Alu	both	0.256407197	0.051662484	0.037127578	0.308982756	0.056476449	0.047775374	0.830411468	0.048088131	0.090909091	0.042253452	0.050850681	0.034356418	0.021441525	0.036250127	0.054778696	0.298022666	0.045757121	0.046105697	0.614740873	0.041824136	0.043698972	0.088730303	0.034016741	0.022468631	0.003346608	0.053300958	0.032186628	0.484699737	0.054182335	0.060235358	0.028954578	0.044419445	0.053800453	0.138942982	0.056110768	0.046484288	0.036600254	0.04739291	0.029391884	0.552892067	0.027837907	0.025122549
DFFA	-	Alu	both	0.078063508	0.078712401	0.052404651	0.186725557	0.090238892	0.077073858	0.116258107	0.086352222	0.025	0.004287565	0.086239511	0.056332618	0.82716501	0.080707715	0.073004972	0.242936651	0.076537489	0.083593359	0.00047218	0.061870209	0.095578392	0.001453663	0.055976412	0.020516186	0.000630196	0.08626767	0.05361891	0.979444436	0.087815628	0.088595481	0.137616472	0.078817011	0.087054643	0.008586877	0.088098244	0.065429185	0.489194374	0.080640542	0.084432882	0.720648086	0.044446876	0.039828432
DFFA	-	Alu	both	0.302429944	0.033600276	0.027123041	0.003358125	0.032062039	0.043931791	0.74572528	0.029324497	0.027419355	0.766308205	0.025467617	0.021664785	0.397007288	0.039356052	0.044684238	0.005364222	0.035599652	0.044008163	0.019886865	0.034573644	0.042874588	0.139139472	0.021364436	0.01521978	0.261579025	0.030371045	0.028804102	0.001169912	0.028403458	0.063569932	0.276833468	0.038543602	0.042850021	0.269790997	0.025612792	0.024440882	0.67111912	0.033511656	0.032939665	0.004616798	0.016138295	0.066547619
DFFA	-	Alu	chimp	0.032770803	0.058533702	0.029745933	0.004675562	0.066146839	0.042735411	0.412729624	0.050748748	0.022727273	0.27603027	0.060405642	0.055238899	0.530376447	0.033491429	0.035418136	0.41896627	0.060450263	0.059897164	0.018320559	0.044138984	0.062553135	0.005165076	0.04346306	0.016825758	0.00128582	0.058227933	0.033819142	0.028539415	0.052663741	0.070911926	0.118507273	0.045603191	0.053495555	0.000427827	0.05862844	0.03823408	0.299577701	0.054472346	0.042006028	0.728115003	0.046308655	0.044496926
DFFA	-	Alu	no-conserve	0.021375566	0.263854738	0.186172571	0.125635265	0.289603656	0.27815447	0.688807372	0.290398566	0.284949285	0.012488522	0.311125665	0.253428426	0.000219394	0.247280362	0.334271707	0.002020037	0.26804079	0.339516896	0.001831389	0.25955304	0.347400116	0.000118994	0.160151881	0.048464286	0.004411758	0.255943406	0.181815688	0.276172909	0.315757207	0.340919889	0.195449318	0.248875415	0.290531104	0.008017827	0.306872124	0.231164695	0.804433436	0.286350074	0.292146655	0.844520173	0.192203291	0.181796245
DFFA	-	Alu	rhesus	0.710753069	0.03017	0.023777095	0.009196678	0.035108017	0.021084009	0.401966949	0.030596938	0.009259259	0.000426308	0.037799917	0.013660113	0.014730485	0.01467732	0.030904412	0.063594952	0.034587685	0.035814889	0.000398202	0.022308844	0.04055691	0.024650773	0.031388166	0.016894123	0.038106778	0.037633768	0.024362305	0.207739662	0.03105247	0.035901861	0.049518003	0.021862894	0.026874505	0.000915245	0.041145893	0.018675128	0.483151922	0.031427338	0.028009953	0.652864656	0.020819856	0.008064516
DFFA	-	Alu	no-conserve	0.075578321	0.05141853	0.025381715	0.000229944	0.060239032	0.034854575	0.81717263	0.051667382	0.038655462	0.00330996	0.063271782	0.033697143	0.010581863	0.024239776	0.046264012	0.9878475	0.060729421	0.056788112	0.019912601	0.036374777	0.048694053	0.00192158	0.053339495	0.023476837	0.138638618	0.059707477	0.050172592	0.593316326	0.053107492	0.057896105	0.528402189	0.043361653	0.044149523	3.34E-07	0.068709118	0.019741729	0.031689078	0.052143555	0.033078856	0.573033783	0.029313221	0.0125
DFFA	-	Alu	no-conserve	0.453368705	0.048925095	0.037350248	8.13E-05	0.049594038	0.025746869	0.151855276	0.048410768	0.009803922	0.001486051	0.053801622	0.026870367	9.06E-06	0.031101296	0.073761756	0.302412128	0.049183048	0.050045864	0.000686575	0.043248108	0.065449823	0.000176445	0.050762613	0.01291342	0.433676502	0.05952273	0.052458698	0.085642787	0.04625377	0.063863301	0.013406625	0.04006318	0.053448177	3.98E-05	0.062598498	0.025418711	0.066459168	0.054006479	0.037478289	0.696928162	0.023638541	0.010416667
DFFA	-	Alu	no-conserve	0.517368562	0.080399642	0.072709638	0.052226019	0.077333072	0.085322865	0.974929035	0.084112083	0.077984817	0.380486519	0.098048663	0.084607521	0.185231777	0.098972151	0.126304463	0.006157715	0.071405378	0.09322365	0.098413389	0.074442887	0.092825855	0.001824749	0.025316868	0	2.39E-05	0.068701147	0.024196267	0.173110678	0.096653771	0.064047302	4.98E-05	0.086592055	0.14182504	0.002623752	0.154871323	0.099641535	0.608769159	0.093779849	0.093168471	0.264849938	0.061666015	0.094598416
DFFA	-	Alu	rhesus	0.969312769	0.045208969	0.052450374	0.166327732	0.051859636	0.054148281	0.753870292	0.046073789	0.025987007	0.826623503	0.069159387	0.067915279	0.009894443	0.035280199	0.062201514	0.013304627	0.049530478	0.057863561	0.121003207	0.040434583	0.050475256	0.000512085	0.024706215	0	0.03590678	0.045451413	0.032193351	0.218798772	0.061415328	0.080218613	0.019224412	0.050113483	0.069733723	0.013239198	0.142209007	0.098105673	0.772546543	0.048521288	0.046351613	0.048284404	0.034678924	0.111263737
DFFA	-	Alu	no-conserve	0.649237935	0.085171132	0.07548054	0.003026902	0.08967217	0.106395287	0.741397781	0.096692989	0.067070707	0.625653264	0.118082867	0.106574655	0.128924668	0.102325448	0.135740909	0.091243612	0.087857422	0.099875406	0.107884202	0.091603174	0.112054897	7.55E-05	0.045046232	0	0.077410494	0.084809393	0.05742972	0.227043787	0.123691409	0.096294722	1.65E-06	0.084898555	0.152351391	0.22709626	0.211041501	0.182592515	0.841575626	0.100431673	0.093040583	0.139509772	0.069351556	0.145220912
DFFA	-	Alu	chimp	0.93375831	0.051228994	0.047464835	0.098110556	0.055666423	0.046209905	0.816386889	0.0531218	0.04	0.001728275	0.05881919	0.030753776	0.041601019	0.03098938	0.048295728	0.102299281	0.050120278	0.051348985	0.012143308	0.030465926	0.048074911	3.45E-05	0.052813145	0.016328671	0.038984441	0.051135921	0.038859041	0.507544451	0.052241348	0.045083265	0.025110586	0.033253715	0.043043653	0.000298514	0.073168868	0.038544096	0.949940739	0.049580137	0.046482531	0.770647404	0.019610103	0.022727273
DFFA	-	Alu	chimp	0.13099395	0.125176801	0.087012866	0.057733642	0.13044661	0.113107988	0.696465073	0.135427068	0.105079365	8.28E-05	0.156750207	0.099541487	0.000146034	0.083969302	0.126280843	0.448082973	0.119691276	0.124770027	0.00056953	0.08779489	0.13862111	1.67E-06	0.117507785	0.035257944	0.069497756	0.137549821	0.109925108	0.646196058	0.141981704	0.124269295	0.033041029	0.092247996	0.106194208	0.002336243	0.194478508	0.137941282	0.855548712	0.125829921	0.118288895	0.070497779	0.053607148	0.113871636
DFFA	-	Alu	both	0.195917992	0.079347315	0.061185544	0.007732784	0.094308415	0.107332218	0.882296565	0.080757222	0.076556776	0.004451251	0.097599699	0.064993997	0.078787038	0.07555319	0.099651334	0.625801572	0.087403144	0.088824674	1.42E-05	0.064538706	0.113177548	0.001314776	0.069983827	0.03719077	0.335971685	0.089220815	0.079573141	0.063592392	0.091902535	0.059157202	0.012323619	0.083411842	0.104507297	0.000693414	0.109444465	0.071701437	0.055204865	0.098080632	0.11149979	0.002255224	0.042792954	0.142387218
CLCC1	-	Alu	no-conserve	0.149761429	0.038654404	0.019319478	0.001190701	0.04417296	0.03300079	0.247185792	0.023643942	0.006410256	0.28238247	0.025028632	0.020884987	0.255527729	0.024654266	0.037332613	0.012715821	0.058331721	0.047111539	0.06333155	0.029997218	0.047739908	0.374381944	0.055710678	0.061443571	0.655756491	0.049150895	0.045615581	0.023375424	0.037030828	0.061191492	0.183285482	0.034636496	0.027165539	0.167465837	0.060104117	0.050684632	0.978060109	0.029329824	0.028168297	0.085151877	0.034099781	0
CLCC1	-	Alu	no-conserve	0.502153038	0.060790806	0.069411545	3.96E-06	0.073939904	0.055388169	0.911258972	0.04745181	0.037122957	0.94907321	0.054093803	0.051916081	0.669246659	0.063874208	0.065108835	0.001405444	0.07804353	0.063288616	0.255412752	0.060438117	0.069494905	0.645416056	0.07161759	0.073209272	0.421693564	0.071825098	0.069489115	0.548122505	0.060583759	0.063923281	0.054168133	0.048519629	0.042175509	0.036556633	0.081588922	0.059624972	0.303121939	0.047713331	0.041899031	0.260571134	0.057790927	0.02631579
CLCC1	-	Alu	no-conserve	0.738433028	0.13235845	0.136999981	0.012404077	0.135070136	0.118086655	0.451655675	0.100876012	0.127855589	0.696466464	0.09383622	0.09162218	0.135220816	0.118611624	0.141613749	0.041796329	0.152615457	0.135860281	0.918378284	0.148084381	0.145261442	0.319174605	0.132339524	0.121578457	0.888317574	0.136423042	0.134671294	0.701194636	0.125371796	0.125484673	0.176832869	0.109336238	0.102026587	0.058426904	0.141822453	0.112234729	0.086830783	0.111880483	0.098481359	0.439243313	0.137384808	0.167620921
CLCC1	-	Alu	no-conserve	0.011626428	0.052898964	0.009311741	0.086641527	0.095282171	0.073977939	0.158169573	0.02894606	0	0.018004063	0.03283587	0.016668125	0.003997299	0.036900678	0.027272727	6.50E-08	0.139645394	0.056588436	0.321297121	0.058945731	0.047816628	0.007349371	0.038308637	0	0.093922852	0.068983852	0.053552793	0.37563244	0.061771246	0.089333082	0.945300021	0.073014087	0.070072991	0.000795788	0.056359378	0.020268017	0.084889531	0.036618253	0.058163323	0.571622665	0.011080433	0
SIKE1	-	Alu	chimp	0.306939513	0.008724946	0.00701748	0.097064834	0.006025002	0.004671915	0.215886061	0.006677786	0	0.456903406	0.004289207	0.00316594	0.956629305	0.008411578	0.010958353	0.257951517	0.007474741	0.004468844	0.355667261	0.014853067	0.006440802	0.101460735	0.008726242	0.004877671	0.000355427	0.006931354	0.001609525	0.678626082	0.005939162	0.005345286	0.689957971	0.008540492	0.006602015	0.007854497	0.007146934	0.001497114	0.081060273	0.006713973	0.003194102	0.38332141	0.014278272	0.020622896
CPSF3L	-	Alu	no-conserve	0.018624878	0.111127268	0.068738667	0.018834602	0.082153285	0.058892404	0.722868886	0.096330993	0.111111111	0.093900916	0.039059417	0.016501423	0.023122969	0.058781585	0.095093798	4.40E-10	0.146255961	0.052944768	0.901771529	0.097933152	0.094563006	1.50E-06	0.064830493	0.001818182	1.37E-11	0.075190759	0.013367241	0.037595059	0.076924158	0.028665284	0.15810994	0.078741029	0.064880377	0.044530559	0.09726525	0.070112591	0.000835619	0.092211791	0.05688818	0.473925789	0.061050343	0.0625
CPSF3L	-	Alu	no-conserve	0.058331866	0.070074285	0.045800884	0.0662837	0.04534785	0.03586376	0.533267884	0.052593477	0.033333333	0.004703295	0.02487829	0.005158949	0.069082747	0.038761954	0.042897727	3.64E-07	0.073223978	0.033666772	0.965466811	0.049512729	0.04580705	7.55E-05	0.036068791	0	5.94E-08	0.049231637	0.012341544	0.059756473	0.045443886	0.017757766	0.004435587	0.044191042	0.025915823	0.005769589	0.068413037	0.040251596	0.00145098	0.047181223	0.024717846	0.960929635	0.045718235	0.038461539
CPSF3L	-	Alu	no-conserve	0.080815578	0.093468753	0.051646499	0.001397053	0.058629044	0.08431444	0.922114529	0.080025811	0.077380952	0.094326736	0.031340193	0.015224359	0.041252169	0.036077161	0.071654335	3.95E-10	0.110498972	0.026649771	0.301701795	0.088835641	0.069659905	0.003968179	0.03980641	0.01	1.12E-09	0.063143363	0.009179406	0.008327558	0.060415374	0.009150327	0.023439282	0.082479867	0.052977534	0.147911249	0.064297382	0.051275797	0.03789779	0.084633879	0.056026553	0.499214614	0.022370828	0.05
CPSF3L	-	Alu	no-conserve	0.004025494	0.138547523	0.054770869	0.056189088	0.099374654	0.121738578	0.112931831	0.139635201	0.343412909	0.029572054	0.052988697	0.019966299	0.00466544	0.059225531	0.124825464	1.13E-09	0.174666499	0.058686014	0.547820043	0.132547485	0.117868111	0.001999802	0.060932884	0.015090909	2.35E-08	0.096786856	0.026764681	0.008061865	0.106788428	0.036140004	0.085493162	0.106937924	0.08390873	0.009641029	0.11375479	0.069860242	0.119715076	0.1264863	0.098895923	0.320907926	0.044095031	0
CPSF3L	-	Alu	rhesus	0.002880474	0.127335186	0.047972089	0.186719578	0.090857375	0.099380743	0.729620871	0.122552183	0.109697933	0.0877448	0.044062988	0.025873396	0.007156973	0.055454566	0.107504929	1.16E-09	0.170749575	0.050058441	0.518622124	0.1313564	0.105641879	0.000199747	0.05936434	0	5.70E-10	0.091818316	0.019201173	0.00183904	0.094347041	0.016821465	0.464169079	0.094089926	0.087958632	0.002596633	0.116240124	0.068660174	0.066535805	0.113853815	0.087655485	0.349700648	0.038917327	0
CPSF3L	-	Alu	chimp	0.379383517	0.050540507	0.127958202	0.731921319	0.038322984	0.042861225	0.14697895	0.027293767	0.107925129	0.044954438	0.019212355	0.005395068	0.001895531	0.019773282	0.065071468	1.90E-11	0.072213311	0.007380416	0.19721286	0.036782668	0.042005871	0.006192737	0.013656477	0	0.000691618	0.037737876	0.018462644	0.198105781	0.04439391	0.024296129	0.92359512	0.044008353	0.046890279	0.5932412	0.027018415	0.05498906	0.001240028	0.044727263	0.019590062	0.530032729	0.010643378	0
CPSF3L	-	Alu	chimp	0.006149741	0.265173474	0.143853953	0.004166812	0.229846014	0.28818984	0.364721608	0.276760143	0.381944444	0.003363048	0.175779419	0.067293513	0.005108825	0.089205507	0.167906362	1.45E-09	0.325972765	0.061177069	0.357346712	0.229674648	0.167216465	0.001065474	0.102310142	0	3.95E-08	0.270051703	0.080504765	0.145607062	0.205269877	0.101242529	0.006605468	0.246209747	0.167655466	0.001763275	0.273284072	0.128163229	0.930773129	0.242721742	0.238945096	0.522238893	0.045313525	0
CPSF3L	-	Alu	chimp	0.005074918	0.236695518	0.120281151	0.008774671	0.204805442	0.252859623	0.233281276	0.229999813	0.39781746	0.001118972	0.150491943	0.050572533	0.002270273	0.074071814	0.161421098	5.90E-10	0.306466817	0.04722976	0.212123072	0.199695415	0.131582151	0.001276065	0.090393603	0	2.60E-10	0.231673209	0.037800626	0.074181539	0.181122405	0.072666794	0.017825244	0.229284682	0.158799594	0.003391248	0.244986938	0.129826212	0.438861185	0.221593743	0.203538798	0.514593599	0.044499958	0
CPSF3L	-	Alu	no-conserve	0.78533338	0.080479029	0.08042663	0.366208602	0.069014538	0.058539859	0.369561257	0.074983344	0.124904214	0.128078638	0.027781427	0.009451994	0.041848608	0.033080396	0.059394887	2.72E-09	0.119361277	0.0193102	0.708611141	0.064081216	0.074508212	0.012232288	0.025501726	0	1.64E-09	0.069188987	0.007732497	0.270963459	0.065003912	0.037353765	0.17378102	0.069768179	0.051316637	0.002527376	0.052858271	0.013351642	0.483938957	0.06428205	0.053385778	0.219379777	0.013322187	0.041666667
CPSF3L	-	Alu	chimp	0.026856413	0.028615629	0.004994019	0.117993195	0.023337616	0.019401109	0.15451995	0.03315748	0	0.183749802	0.016303437	0.007055488	0.585608645	0.019166647	0.017092796	3.92E-06	0.049750093	0.011267526	0.501638639	0.031681561	0.020198372	0.055127418	0.010099317	0	0.000100503	0.024243652	0.003134796	0.255482928	0.020754016	0.008978328	0.466195408	0.029438195	0.024537068	0.003766134	0.034456827	0.011111111	0.773486535	0.033939859	0.031604291	0.470840831	0.016632655	0.025
CPSF3L	-	Alu	chimp	0.238108259	0.105896579	0.103423359	0.557681985	0.104060908	0.098687287	0.663220275	0.101218477	0.073607427	0.002189472	0.064199019	0.027420391	0.125294725	0.068505641	0.081920457	4.41E-11	0.183074735	0.069933545	0.865927776	0.115717005	0.107850066	1.02E-07	0.08694386	0.001052632	1.56E-05	0.095937636	0.046298692	0.000146103	0.118417455	0.028135998	0.43166493	0.104751225	0.097970553	0.001287244	0.056764641	0.018101398	0.039507036	0.099258314	0.077478128	0.445314705	0.02617808	0
SSU72	-	Alu	no-conserve	0.990174651	0.017163046	0.016861462	0.81233014	0.023901435	0.020790793	0.881726242	0.017162947	0.008683473	0.089333292	0.017867827	0.007480709	0.004433619	0.012465937	0.020458817	0.023782894	0.022657014	0.026077838	0.009835577	0.019263706	0.025855723	0.341863928	0.020980165	0.016265353	0.511598539	0.018916676	0.018395963	0.654486859	0.022893657	0.018652269	0.290689799	0.020115614	0.015784906	0.855918103	0.021469098	0.029712422	0.544047556	0.019003189	0.01834866	0.688635327	0.017280272	0.05
OTUD7B	-	Non-Alu-repetitive	no-conserve	0.004889108	0.301240134	0.153213898	5.61E-19	0.286034549	0.121768	0.054305849	0.278726814	0.092623506	6.94E-12	0.263274012	0.067443289	2.53E-08	0.047048716	0.190943869	0.553995305	0.201334198	0.209145486	0.018767835	0.11530612	0.175616572	0.044471654	0.339035057	0.263452361	1.65E-06	0.258143469	0.130742851	0.69557816	0.238985002	0.210510474	0.930546787	0.17241421	0.165210338	3.05E-08	0.28715169	0.113746642	0.005006409	0.226301371	0.1691541	0.417795101	0.155584975	0.052564103
OTUD7B	-	Non-Alu-repetitive	no-conserve	0.114751975	0.04414869	0.03085647	4.48E-16	0.040977934	0.008975637	0.101355341	0.030737134	0	0.003078537	0.025385206	0.006760351	0.010075341	0.00701104	0.03415873	0.704246806	0.020785248	0.022582721	0.789654468	0.012848661	0.020859594	0.228847129	0.044827579	0.040132288	0.000477317	0.032476105	0.011750176	0.401511247	0.031820929	0.016805403	0.841205977	0.019078763	0.019099973	9.66E-05	0.040717684	0.010795486	1.70E-05	0.026238003	0.008129874	0.804487962	0.023438289	0.013888889
OTUD7B	-	Non-Alu-repetitive	chimp	0.000973699	0.063465082	0.016955116	1.28E-24	0.058384547	0.011602182	0.731300819	0.057036225	0.038315127	0.005049883	0.036879049	0.012415723	0.000142383	0.013020434	0.043328331	0.519067477	0.037719582	0.036420258	0.067192992	0.021767633	0.041354639	0.000238156	0.077930069	0.043663018	2.19E-07	0.057741482	0.017655708	0.181350788	0.046733109	0.025372923	0.65870391	0.027737516	0.02860477	0.000517784	0.054744694	0.018556766	8.53E-06	0.040422411	0.017121095	0.9766245	0.026056323	0.020833333
OTUD7B	-	Non-Alu-repetitive	no-conserve	0.560911711	0.125979185	0.160386604	1.43E-17	0.130128142	0.065777567	0.773386909	0.116332867	0.113583521	8.49E-07	0.115877892	0.047015352	3.24E-08	0.028784041	0.129873869	0.379805658	0.119694686	0.110334285	0.000333586	0.064744173	0.118774826	0.822598965	0.154168622	0.154986018	0.659990748	0.128978207	0.136467236	0.022387355	0.117632221	0.167296356	0.089620173	0.083028367	0.065867092	0.007306163	0.129286676	0.08730318	0.000500238	0.097050706	0.066942966	0.043326921	0.048437826	0.148601399
OTUD7B	-	Non-Alu-repetitive	chimp	0.03758649	0.345132928	0.239488944	3.92E-32	0.396067158	0.1519826	0.030247567	0.358241292	0.138043615	2.08E-12	0.314754432	0.101785179	5.37E-10	0.074536385	0.332700278	0.949816354	0.292617447	0.289302872	3.98E-05	0.180359537	0.317893508	0.064020292	0.460458115	0.385659679	9.91E-08	0.366331576	0.230633284	0.143402214	0.349240649	0.285836132	0.665623621	0.22090631	0.20580992	1.02E-09	0.356669727	0.128713562	8.78E-07	0.290022918	0.192672558	0.406759578	0.156465264	0.203817017
OTUD7B	-	Non-Alu-repetitive	no-conserve	0.00144321	0.127295659	0.057577726	3.26E-21	0.123109409	0.044364696	0.342226864	0.125309016	0.075	7.12E-10	0.119722864	0.02963724	6.14E-07	0.033585334	0.106337572	0.131390186	0.090806924	0.103934238	0.016760036	0.051740395	0.105828983	0.096214872	0.163747933	0.123239127	2.66E-08	0.119485812	0.050514178	0.306830285	0.104104042	0.083854558	0.198443265	0.064465882	0.072017598	5.99E-07	0.123308772	0.04310093	0.00240709	0.097058307	0.069202912	0.66007509	0.044805159	0.019230769
OTUD7B	-	Non-Alu-repetitive	no-conserve	0.019366755	0.07087476	0.036554276	4.35E-20	0.068631079	0.019439212	0.113322343	0.066007614	0.011934156	6.17E-07	0.062721251	0.01708452	1.66E-06	0.009015403	0.064780302	0.030354371	0.040056498	0.049842926	0.034364023	0.026786329	0.056009974	0.203063358	0.08348327	0.065293963	3.52E-07	0.057776022	0.019080146	0.122845013	0.058148574	0.038219576	0.908366156	0.032964583	0.031074768	7.73E-05	0.072104479	0.025364259	0.002625346	0.051624328	0.035287878	0.261602663	0.025559987	0
CTSS	-	Non-Alu-repetitive	no-conserve	0.135075026	0.057881437	0.023511743	0.00452077	0.067298195	0.042728788	0.083901483	0.057032303	0	0.035765946	0.05597513	0.024243225	0.782487619	0.026426172	0.020235203	7.79E-10	0.075359706	0.029019269	0.006194167	0.036135848	0.013542635	0.001830454	0.116443361	0.174027951	0.332407935	0.095398166	0.078933507	0.315008438	0.091904117	0.071939034	0.478589568	0.01361617	0.015992556	0.020807884	0.063500063	0.045698923	0.000150254	0.053506751	0.034701695	0.492514503	0.014083324	0
CTSS	-	Alu	no-conserve	0.856686064	0.0512336	0.046029335	0.003808808	0.070692918	0.051127665	0.206170655	0.056160201	0.018518519	0.000192965	0.05989295	0.026211361	0.895700819	0.039124591	0.035752591	3.38E-10	0.066679676	0.032466499	0.283930657	0.047872201	0.038247353	3.37E-05	0.095716754	0.146123259	0.269938864	0.07614072	0.068582564	0.38212759	0.087473818	0.075365394	0.724625121	0.03682331	0.034099881	0.000183003	0.039257837	0.020219272	0.000142725	0.072493214	0.048463692	0.693604893	0.012920827	0.011363636
CTSS	-	Alu	no-conserve	0.250198002	0.031763618	0.028819471	0.141779395	0.028437935	0.028342856	1	0.038893734	0.027777778	0.426628704	0.077583152	0.051127104	0.892634163	0.019072557	0.018442224	8.56E-11	0.061953735	0.010511306	0.109009433	0.034242353	0.024939852	0.399263817	0.042659378	0.034737324	0.70822299	0.056720603	0.052381234	0.59194614	0.098370891	0.075466685	0.151469733	0.012986247	0.019996235	0.013195639	0.111771467	0.075592719	0.000651904	0.05482545	0.029977782	0.689710409	0.019239993	0.019230769
CTSS	-	Alu	no-conserve	0.091511566	0.069073194	0.078319846	0.000450822	0.055121555	0.079645663	0.880416904	0.065438437	0.060606061	0.141574402	0.164911598	0.087158465	0.386515309	0.029751123	0.016968661	6.90E-11	0.111023793	0.031596494	0.009020855	0.068122645	0.028942354	0.105303213	0.047234882	0.028195879	0.762513595	0.105746622	0.099973568	0.498899435	0.137435833	0.142865929	0.006758703	0.025415236	0.041323781	0.000795773	0.29163297	0.185788228	3.34E-06	0.104131715	0.050035531	0.203003452	0.063951938	0.160714286
CTSS	-	Alu	no-conserve	0.902732871	0.315756153	0.316016723	0.000522613	0.271294939	0.385879585	0.665920029	0.291938385	0.212121212	0.479765876	0.376910787	0.363957227	0.694710139	0.171728559	0.204216517	9.52E-12	0.496691991	0.192171122	0.071947525	0.360386401	0.250832284	0.033693294	0.168421468	0.084431266	0.057664656	0.477745476	0.500457918	0.223563183	0.486766603	0.515813198	8.47E-06	0.137393889	0.295711538	0.00013431	0.661994426	0.45369745	2.20E-07	0.464903439	0.259357619	0.028239931	0.179870761	0.500641026
CTSS	-	Alu	no-conserve	0.525251766	0.053048093	0.036554151	0.955694278	0.042333118	0.035443908	0.106796919	0.046750096	0	0.4380182	0.043836149	0.029405299	0.524263227	0.034465912	0.040184915	2.84E-06	0.06516441	0.035782251	0.110431105	0.042324586	0.030438804	0.15893675	0.042852659	0.02648783	0.001182224	0.060392071	0.036556159	0.831977523	0.060574607	0.047506958	0.202122987	0.031816625	0.040154811	0.391653343	0.055891259	0.053619266	5.18E-07	0.057428288	0.02589946	0.391821967	0.018303957	0
CTSS	-	Alu	no-conserve	0.635296024	0.093924505	0.09855937	2.45E-07	0.071915948	0.114668385	0.715810563	0.075082525	0.060606061	0.006761855	0.067880069	0.10540822	0.449848195	0.052210361	0.073547426	4.04E-06	0.105717686	0.061147871	0.081331454	0.086969856	0.065947743	0.266683817	0.049295078	0.037231951	0.001593559	0.114671812	0.142500605	0.000652455	0.094720049	0.152204851	4.95E-06	0.049641583	0.094543436	0.00063887	0.182885555	0.101508341	1.21E-06	0.123612244	0.070378019	0.495662658	0.027415381	0.055555556
CTSS	-	Alu	no-conserve	0.828976874	0.046010335	0.039400545	1.57E-05	0.041325106	0.064028398	0.391008308	0.049350033	0.020833333	0.111324247	0.046984877	0.050613189	0.936254962	0.030181566	0.03803089	8.41E-06	0.056859334	0.029402128	0.113758487	0.048706299	0.037553596	0.136253923	0.030552981	0.020082669	0.064909147	0.062449495	0.06873905	0.016871774	0.051970509	0.071851127	0.0004439	0.032867021	0.056330105	0.049462581	0.103480064	0.086205046	0.00341662	0.066006537	0.045527401	0.59959968	0.022816489	0.034090909
CTSS	-	Alu	no-conserve	0.390089102	0.060494698	0.041780597	0.010382409	0.051683847	0.058166033	0.062940524	0.062265623	0	0.084650584	0.056406472	0.0610117	0.338175376	0.042255184	0.065435692	2.88E-06	0.073225914	0.043925764	0.013383584	0.058714081	0.032623627	0.019258622	0.035542355	0.011407629	0.257606942	0.085707258	0.093088844	0.057300627	0.073404459	0.092868925	0.00284968	0.042335372	0.069474087	0.016420997	0.101806018	0.073489247	0.002519578	0.078226031	0.053231207	0.611107187	0.028978918	0.047619048
CTSS	-	Alu	no-conserve	0.9098847	0.101536992	0.088310103	1.62E-07	0.092776709	0.149634601	0.88996667	0.120452236	0.121212121	0.007526018	0.103388919	0.147294904	0.917550046	0.112406644	0.115275997	5.83E-11	0.189032059	0.068403325	0.000294187	0.142745685	0.051212236	0.15716851	0.052066564	0.027657245	0.261320022	0.172586183	0.190460136	0.734090627	0.173279	0.19264737	1.21E-05	0.061056643	0.116492099	0.020473367	0.132728737	0.09308123	0.000403077	0.178074989	0.116384677	0.681333974	0.034844533	0.041666667
CTSS	-	Alu	no-conserve	0.770760508	0.127672535	0.128407468	6.30E-08	0.115483746	0.190973016	0.115341416	0.153708314	0	0.002209816	0.124741177	0.185784012	0.326494661	0.137757182	0.09779638	5.14E-12	0.254810297	0.084231567	0.000202927	0.178476815	0.058093449	0.133896996	0.062992747	0.026447977	0.200949677	0.219219161	0.253019207	0.9320837	0.246552902	0.26932208	1.29E-07	0.05558367	0.132780172	0.016356375	0.207750452	0.13927091	2.00E-07	0.236762399	0.117093636	0.611445091	0.065096809	0.111111111
CTSS	-	Alu	no-conserve	0.663768458	0.064211922	0.043100744	1.09E-06	0.061043966	0.095365436	0.143954056	0.069193925	0	0.010665102	0.071818442	0.077054645	0.816722892	0.035128078	0.041785225	3.02E-10	0.133550108	0.047084641	0.000601628	0.075581419	0.025096489	0.158250389	0.027475032	0.008264209	0.354698269	0.101812359	0.107388115	0.46021856	0.119182289	0.134129505	5.65E-05	0.030130496	0.061974696	0.015164478	0.075981743	0.049857117	0.000359995	0.099847768	0.06516144	0.499736531	0.016975073	0
CTSS	-	Alu	no-conserve	0.176010392	0.074586978	0.104935054	6.39E-13	0.056925954	0.130722571	0.154515117	0.072833714	0	2.27E-07	0.056397092	0.129710086	0.5757384	0.063136756	0.040874903	4.92E-11	0.128664699	0.034915494	0.018699312	0.094755484	0.046602033	0.057573517	0.029107172	0.001961722	0.00159725	0.12212909	0.161092479	0.002708583	0.103986065	0.179177456	1.78E-06	0.023316682	0.061240034	0.0212115	0.139225045	0.090804296	5.72E-06	0.133777498	0.066261643	0.475522718	0.023262168	0.066666667
CTSS	-	Alu	no-conserve	0.236740947	0.047018099	0.021780799	0.006101583	0.040566219	0.045687427	0.140537252	0.046279584	0	0.03829165	0.046869066	0.051088743	0.497558381	0.023993189	0.048843797	2.92E-10	0.06769188	0.020757995	0.03814751	0.038711463	0.024652531	0.197567379	0.042462259	0.025572112	0.518510903	0.082406205	0.068251029	0.168007119	0.074262909	0.083603634	0.249659019	0.015948869	0.019530397	0.000202066	0.037083263	0.009893369	1.01E-05	0.065334163	0.031906855	0.215154128	0.010849019	0.068181818
CTSS	-	Alu	no-conserve	0.997424571	0.063931743	0.059871225	0.001187124	0.054917027	0.072012989	0.10405143	0.06795253	0	0.183961956	0.060047873	0.053026462	0.216960748	0.043893859	0.073938819	4.54E-10	0.092295908	0.036503155	0.014406288	0.059116467	0.030410419	0.372520947	0.04016265	0.032747621	0.640166899	0.102624043	0.094047517	0.177828733	0.09181466	0.108938316	0.000873828	0.033472018	0.052670548	0.001412758	0.102681162	0.056788723	4.11E-06	0.092034012	0.048418344	0.011757588	0.011482285	0.043560606
CTSS	-	Alu	no-conserve	0.811903272	0.085683568	0.072998763	0.002345803	0.069543522	0.084679425	0.880685537	0.080700408	0.083333333	0.255931993	0.071447844	0.064728971	0.432577022	0.051707522	0.081089774	1.95E-09	0.113358201	0.046263712	0.00335833	0.079318649	0.038355368	0.176796588	0.060500706	0.03308535	0.018429955	0.137200421	0.110491624	0.728640829	0.117124562	0.111840794	0.000940999	0.036885873	0.05527557	0.012590859	0.113044295	0.072850879	4.45E-10	0.113822471	0.044004547	0.01358083	0.013274891	0.06439394
CTSS	-	Alu	no-conserve	0.956227454	0.134653258	0.112936318	0.202704896	0.120048026	0.115348364	0.489346339	0.138666995	0.083333333	0.387336657	0.122043694	0.108512971	0.433180415	0.078344542	0.096937384	5.04E-13	0.183265305	0.063932723	0.00039699	0.14490612	0.054831701	0.15404427	0.083639963	0.058619714	0.062006732	0.206055058	0.18485049	0.706972735	0.199256039	0.210050113	0.000174949	0.064709995	0.11364736	0.000300373	0.215502781	0.126932956	8.97E-09	0.182411961	0.087959104	0.476648427	0.028637142	0.1
CTSS	-	Alu	no-conserve	0.316679518	0.046917483	0.02828783	0.019242926	0.050403522	0.061972386	0.077140019	0.045710709	0	0.900730796	0.054758225	0.046586829	0.30783056	0.03648349	0.049520137	3.17E-09	0.065528387	0.027149273	0.062067123	0.049313028	0.034867372	0.945394349	0.044048088	0.050052525	0.98558066	0.070721161	0.069412321	0.420979214	0.07477789	0.074255085	0.024446809	0.030943485	0.037612789	0.015630543	0.063892503	0.046316651	4.75E-05	0.066443062	0.036978567	0.517873364	0.015459759	0.029411765
CTSS	-	Alu	no-conserve	0.829412962	0.063489118	0.060469594	0.771405019	0.066363632	0.067146637	0.323446455	0.071619974	0.03030303	0.047121633	0.075839014	0.040476582	0.039484697	0.033765573	0.061649587	1.08E-08	0.093675298	0.043405919	0.039156929	0.061387796	0.043957585	0.048865673	0.072638403	0.116977271	0.000194983	0.102629872	0.069482776	0.946972364	0.085424823	0.077075287	0.024924908	0.040736712	0.056872344	0.000149394	0.0907245	0.04745531	0.001172716	0.076820167	0.057035979	0.034875181	0.016800083	0.090992647
CTSS	-	Alu	no-conserve	0.049214249	0.283630235	0.198705417	0.65267421	0.202045034	0.200997086	0.026802567	0.302122462	0	0.773953364	0.255039095	0.267640738	0.065883437	0.206479874	0.300164917	7.34E-09	0.272746575	0.140267644	0.00454886	0.303063763	0.184290032	0.014734	0.236403608	0.131240693	0.022652856	0.395158069	0.373464	0.454185687	0.264978041	0.269448443	0.006283062	0.172632816	0.248263155	4.28E-08	0.459294591	0.273296526	0.004294605	0.33518322	0.242737315	0.660726614	0.143850258	0.176587302
CTSS	-	Alu	no-conserve	0.39301929	0.055516517	0.042238495	0.65131729	0.06614648	0.056120912	0.138961586	0.054805044	0.116117216	0.033609966	0.06291214	0.036978131	0.02483194	0.039558037	0.06339033	5.53E-07	0.078528316	0.04827397	0.103670291	0.048276877	0.034348217	0.209965444	0.052346256	0.068164093	0.963471982	0.071675298	0.06855336	0.969159767	0.067810106	0.06389685	0.000220534	0.034899519	0.056941669	1.64E-05	0.144811967	0.081922288	1.51E-05	0.06757078	0.04145239	0.169992247	0.063787059	0.118516747
CTSS	-	Alu	no-conserve	0.332680147	0.019792425	0.011281992	0.161573484	0.031613961	0.023828739	0.995567073	0.020511413	0.023809524	0.903866202	0.023069296	0.018441075	0.547014762	0.014985753	0.010396973	1.59E-06	0.032599976	0.018125149	0.001710486	0.023228544	0.009021056	0.541626065	0.027909908	0.032239263	0.323894069	0.029649722	0.027319718	0.76020145	0.030082812	0.023208039	0.419717502	0.012983414	0.012061159	0.063084846	0.058652225	0.04446167	0.132165237	0.020344141	0.032038308	0.18964414	0.028208451	0
CTSS	-	Alu	rhesus	0.042113039	0.045908967	0.020223339	0.435200123	0.054943742	0.047609035	0.059282791	0.05007431	0	0.338344236	0.043707681	0.033779262	0.000945706	0.026152725	0.064949274	2.25E-07	0.05653107	0.030254007	0.546664268	0.043010098	0.047203303	0.488956616	0.04741594	0.051422952	0.617455906	0.064325785	0.058976537	0.939882987	0.064332562	0.061130078	0.128403839	0.035447802	0.038814019	0.03895868	0.071317252	0.05931356	0.00057956	0.056248555	0.035610341	0.305794391	0.037153727	0.044486532
CTSS	-	Alu	no-conserve	0.663714651	0.031249314	0.02195751	0.091533581	0.047741107	0.036439557	0.576569962	0.042766476	0.052525253	0.736233972	0.040193691	0.034894187	0.077882795	0.022068498	0.047068492	4.84E-06	0.053069425	0.034418062	0.099705624	0.039188229	0.030354155	0.390161298	0.043674881	0.059447903	0.363197763	0.048494354	0.039466695	0.517574838	0.051264584	0.041717184	0.002711307	0.023405514	0.038772931	0.000104919	0.132962931	0.079563594	0.083411759	0.038659613	0.032886329	0.675652901	0.066933775	0.026785714
CTSS	-	Alu	no-conserve	0.36163323	0.071334378	0.047691175	0.030407379	0.096602754	0.071630272	0.313836163	0.071790015	0.027777778	0.050706523	0.069378051	0.036965407	0.829796247	0.036422515	0.033927885	1.47E-06	0.113330678	0.075264914	0.461990743	0.05181555	0.051004939	0.073560081	0.166350024	0.223014518	0.011685293	0.118186834	0.086204039	0.041412906	0.110045428	0.075636236	0.453604389	0.036448183	0.036575998	0.107221526	0.127301739	0.095848989	0.000106854	0.067017237	0.037183381	0.667598559	0.046996792	0.022727273
CTSS	-	Alu	no-conserve	0.027489245	0.514647659	0.410143775	0.065654585	0.563959093	0.58402449	0.959573718	0.512666205	0.456349206	0.002443041	0.489047223	0.444374562	0.00171558	0.367870558	0.564749758	0.001810786	0.611678034	0.499724839	0.037461874	0.480076978	0.38796488	0.088851818	0.517878876	0.607181819	0.506521177	0.659268706	0.666878766	0.707987328	0.639719175	0.667897566	0.107976114	0.348985432	0.440322157	0.013207931	0.661054407	0.562378262	8.26E-11	0.63839313	0.442228674	0.24779689	0.281405477	0.4875
CTSS	-	Alu	no-conserve	0.69439011	0.055064243	0.04997945	0.021077692	0.081021916	0.065465317	0.343705921	0.068959976	0.033333333	0.40994278	0.064636753	0.055705136	0.090223292	0.03578163	0.049771448	0.004403962	0.08641639	0.080476838	0.616161437	0.053630872	0.046964793	0.020919383	0.076020467	0.099097162	0.017112366	0.095804769	0.105635298	0.440477836	0.09512955	0.101463719	0.013884026	0.043610947	0.061265137	0.004677527	0.084120103	0.059241252	0.006803631	0.093474837	0.071761618	0.891111934	0.030128344	0.010869565
CTSS	-	Alu	no-conserve	0.056322969	0.055031837	0.02457767	4.62E-06	0.07148498	0.042625064	0.587967826	0.055227692	0.060606061	0.026097476	0.056672933	0.031083363	0.012846914	0.0270381	0.071020934	0.000172561	0.079961093	0.062691336	0.736312031	0.037641126	0.04253545	4.13E-05	0.151290714	0.249353486	0.216599655	0.081012899	0.070125735	0.122476772	0.085602261	0.06784964	0.071831446	0.027631189	0.035809147	0.011347613	0.06238545	0.041863763	0.080644341	0.053774192	0.047550134	0.884125619	0.02078426	0.011363636
CTSS	-	Alu	rhesus	0.502287502	0.152302188	0.116339991	0.000398833	0.226174553	0.190597541	0.099409912	0.165905909	0.033333333	0.030195381	0.17596225	0.118327566	0.006620833	0.110507594	0.184957767	6.07E-05	0.214413564	0.152093323	0.527990142	0.144928086	0.157219747	7.70E-05	0.203067887	0.312108103	0.343468325	0.260456139	0.273208253	0.496857913	0.255417338	0.278457419	0.009682723	0.099627662	0.140624657	7.27E-05	0.198000468	0.129550489	0.000103645	0.236568482	0.170047706	0.781383193	0.044855977	0.068181818
CTSS	-	Alu	rhesus	0.51826778	0.384030838	0.378911138	0.005308008	0.484498495	0.481140774	0.655426346	0.363034043	0.255555556	0.123570093	0.403532698	0.374887795	0.000246531	0.290999964	0.513685107	0.044783643	0.506149084	0.424581609	0.397028081	0.371320067	0.332675361	0.00046679	0.404540716	0.569083659	0.90259966	0.569644107	0.583992667	0.782982004	0.552177115	0.584437441	0.005132395	0.268629362	0.385420385	1.52E-06	0.574630929	0.416166239	6.28E-08	0.555569124	0.400037893	0.805901246	0.1288399	0.170454546
CTSS	-	Alu	no-conserve	0.24392406	0.173098046	0.123463478	5.44E-06	0.258581203	0.209728782	0.037950752	0.175831374	0	0.001542802	0.218930346	0.125524533	0.000875654	0.114933264	0.213640163	0.001160962	0.243406896	0.193910955	0.308871894	0.170036978	0.143379373	0.000638536	0.244451029	0.363528946	0.335239631	0.275688223	0.290438796	0.637004653	0.285808918	0.306250847	0.131638073	0.112589456	0.127222484	4.22E-06	0.264091527	0.172464927	1.32E-05	0.244732894	0.165135548	0.582051996	0.050091949	0.1125
CTSS	-	Alu	no-conserve	0.31316617	0.039104143	0.020684795	0.094011739	0.046784347	0.034803382	0.115344936	0.033822164	0	0.018136114	0.040059825	0.020265593	0.023923506	0.014231371	0.040781283	0.008629693	0.046560432	0.038256448	0.178894233	0.03168649	0.025606206	0.128949096	0.045791301	0.059039517	0.937058399	0.058853457	0.056022571	0.605714999	0.048347325	0.050426719	0.01491718	0.016621193	0.023337747	0.134909704	0.052193913	0.044296801	0.000220374	0.048774019	0.028830977	0.580528621	0.00939768	0
CTSS	-	Alu	no-conserve	0.336807796	0.043851178	0.03111148	0.005025973	0.068817913	0.047861067	0.096119374	0.047922429	0	0.059068326	0.063001057	0.036733002	0.000651673	0.017757958	0.063423864	0.185016874	0.060053793	0.053610121	0.028368291	0.037012959	0.023965306	0.467580715	0.074609788	0.077130331	0.795645544	0.083287784	0.079582288	0.511258012	0.075054624	0.079883973	0.063625563	0.020452197	0.025278807	0.004623499	0.056673391	0.034024501	0.003928779	0.059186228	0.040211543	0.608648054	0.007087463	0
CTSS	-	Alu	no-conserve	0.123997779	0.054728421	0.029433339	0.001331065	0.084019453	0.064827767	0.061091678	0.061029963	0	0.026115124	0.065202365	0.038644195	0.004999706	0.041697383	0.083171848	0.001775028	0.076678509	0.057851868	0.617628715	0.048222197	0.058108427	0.000837461	0.084229053	0.124106587	0.154893729	0.093400812	0.081479105	0.437216339	0.08209703	0.088851431	0.000648159	0.034340368	0.052690005	0.001142264	0.052148712	0.030057708	0.00076885	0.062772851	0.041563767	0.093134318	0.005784113	0.017857143
CTSS	-	Alu	no-conserve	0.015818837	0.179748971	0.085085059	3.21E-11	0.240948771	0.162907912	0.036698194	0.164292221	0	0.001488145	0.192986042	0.101414875	1.81E-06	0.099924324	0.24964823	0.00029063	0.228524983	0.175037042	0.954513229	0.154543381	0.170162303	0.026272984	0.228203501	0.290021954	0.01722154	0.273709896	0.247307586	0.875969786	0.270896559	0.286533565	0.070140147	0.096407659	0.115449242	6.07E-05	0.167680323	0.102256579	4.09E-06	0.199560815	0.130899848	0.505525852	0.026622884	0.052631579
CTSS	-	Alu	no-conserve	0.085683717	0.040800398	0.017859073	0.000450485	0.070665619	0.048069887	0.093577911	0.049269975	0	0.001596396	0.062575459	0.024782622	0.000797012	0.026710845	0.061643743	7.30E-06	0.071717293	0.047114053	0.264582996	0.03923011	0.028417332	0.139017904	0.068936054	0.084260446	0.099254722	0.084976981	0.074077052	0.047413834	0.077212424	0.097624747	0.658181396	0.027348618	0.026909757	0.000586278	0.053204893	0.031667621	0.068294057	0.053018807	0.04490575	0.499734417	0.010788893	0
CTSS	-	Alu	no-conserve	0.542248396	0.095093854	0.078483615	6.05E-05	0.137834135	0.098418258	0.064847061	0.08441442	0	0.174222416	0.108439715	0.083003869	0.037743938	0.053579598	0.087230226	0.062836966	0.130614777	0.111257409	0.782707055	0.080365586	0.080310465	0.009394236	0.092544835	0.137731552	0.83745626	0.152087565	0.151223652	0.242050397	0.14858423	0.169159814	0.010960044	0.054281122	0.069873491	1.02E-05	0.109386619	0.05649461	0.002660421	0.138138847	0.106606723	0.574407289	0.025146681	0.029411765
CTSS	-	Alu	no-conserve	0.118886336	0.163954442	0.088651565	0.000585777	0.249033427	0.196525066	0.776320473	0.155843013	0.133333333	0.414079245	0.206691172	0.163573362	0.027735489	0.107128613	0.187847938	7.02E-07	0.275850629	0.179771539	0.365984451	0.159393058	0.135121914	0.013583203	0.158677967	0.242416908	0.268531456	0.322954221	0.350565132	0.568913077	0.296729993	0.334518128	0.000258545	0.083437888	0.140265965	8.21E-06	0.309665475	0.200734039	6.85E-05	0.239551069	0.153172418	0.565559133	0.045104486	0.038461539
CTSS	-	Alu	no-conserve	0.302994692	0.12551973	0.069384312	0.000406454	0.20893829	0.149656569	0.728016323	0.122784366	0.1	0.326611453	0.165239444	0.107398451	0.012690531	0.084910743	0.172325238	1.88E-09	0.224930079	0.130986959	0.194114914	0.126013318	0.09058753	0.014455228	0.146872146	0.224105859	0.735256247	0.268606742	0.2684404	0.418789501	0.247365637	0.245388935	0.000684804	0.060980664	0.097417794	1.49E-05	0.205881708	0.117527697	2.61E-07	0.196280441	0.101663729	0.471894408	0.030820815	0.041666667
CTSS	-	Alu	no-conserve	0.565589951	0.100120678	0.080520176	0.080913054	0.143461434	0.121466411	0.800670802	0.111682183	0.111111111	0.249866188	0.121276245	0.089533354	0.282662796	0.064301841	0.092722056	0.003168178	0.150889827	0.117755609	0.108580785	0.096730965	0.064690756	0.041096303	0.113253604	0.164445813	0.426278168	0.184947483	0.178378003	0.291568362	0.168186418	0.188603224	0.007644014	0.058317938	0.07159596	0.009722562	0.173645514	0.128774084	0.002233703	0.139335553	0.100015023	0.375995575	0.025218026	0.075
CTSS	-	Alu	no-conserve	0.307968824	0.137631499	0.092245805	0.133030214	0.187765653	0.172363856	0.305999959	0.148319171	0.071428571	0.477895348	0.148254632	0.125496488	0.002308775	0.091016249	0.183743555	0.064769982	0.192895591	0.167835053	0.299890556	0.127892301	0.11124442	0.685988718	0.131926906	0.141131824	0.136615519	0.214826802	0.204986473	0.439255783	0.210218225	0.204505858	5.67E-05	0.073701573	0.12592528	0.005896003	0.228422266	0.165238159	8.98E-05	0.206033265	0.141807201	0.524824482	0.030943873	0.05
CTSS	-	Alu	chimp	0.734506687	0.373302639	0.396741802	0.354494924	0.463802401	0.515594946	0.582886144	0.330982897	0.208333333	0.981553274	0.419218307	0.454982168	0.016875502	0.313260495	0.451378905	1.19E-06	0.501787996	0.562396128	0.309088833	0.391458428	0.35214407	0.436648501	0.29665041	0.325954775	3.92E-05	0.540372562	0.620079124	0.000328169	0.524573242	0.634037701	0.005341333	0.237279549	0.360712052	0.000266012	0.651558146	0.487662862	9.83E-05	0.514330803	0.383143632	0.037918736	0.09355116	0.358333333
CTSS	-	Alu	no-conserve	0.363232147	0.134332788	0.103181951	0.192927402	0.183445076	0.172313063	0.154900552	0.135786782	0.020833333	0.583837752	0.184722841	0.163871716	0.274759706	0.09126007	0.121432262	0.009828575	0.195788451	0.162560503	0.522368911	0.128824061	0.156380455	0.549901934	0.11328818	0.123162566	0.016784884	0.195192342	0.176986403	0.108095418	0.209472876	0.187896152	0.000747341	0.086222749	0.138535791	0.000551805	0.281220221	0.200464478	1.41E-06	0.18367439	0.108699847	0.031831531	0.048891325	0.258333333
CTSS	-	Alu	no-conserve	0.176444458	0.04282299	0.021865202	0.000531608	0.062659602	0.038460503	0.140549071	0.041997027	0	0.013502877	0.114445616	0.058934726	0.55608544	0.026519044	0.035167803	2.64E-05	0.066272934	0.040710955	0.715865765	0.041570013	0.035146459	0.15944961	0.047469024	0.061966984	0.162748166	0.066345086	0.074030926	0.204670002	0.077039287	0.089875928	0.389372671	0.024412347	0.021216279	0.00078673	0.145052293	0.096326261	9.98E-06	0.060810055	0.02971212	0.071564967	0.029135847	0.083333333
CTSS	-	Alu	no-conserve	0.168693566	0.170579334	0.098722617	5.05E-07	0.257741447	0.178416552	0.324128428	0.168562015	0.071428571	0.001722192	0.247229158	0.12762653	0.011021799	0.103983607	0.202819	0.000134943	0.269548815	0.200630148	0.881908737	0.170428409	0.185510064	0.028370191	0.18604768	0.256783622	0.815153086	0.302302143	0.307489022	0.613526647	0.315184217	0.326346621	0.002107405	0.094599635	0.138385554	0.005969782	0.298205759	0.221842192	0.002104341	0.23864341	0.171840698	0.127767664	0.064386137	0.180303031
CTSS	-	Alu	no-conserve	0.666243392	0.056623854	0.057270975	0.02570037	0.088131837	0.06314492	0.562862776	0.056776343	0.027777778	0.041490624	0.085397107	0.045710189	0.090607082	0.036429653	0.063905141	0.000131133	0.086696886	0.062293403	0.761705752	0.045817125	0.047405034	0.165395755	0.066000906	0.096420175	0.540527878	0.102431667	0.105129342	0.858486356	0.114561056	0.117243555	0.001359048	0.028090781	0.05065471	0.006501279	0.106269579	0.080297889	8.76E-06	0.086992853	0.04516212	0.0223295	0.019472111	0.133333333
CTSS	-	Alu	no-conserve	0.454585253	0.052203783	0.02968529	0.0410109	0.085544782	0.061325264	0.579789491	0.056036341	0.025641026	0.115104366	0.07882773	0.049446969	0.182003517	0.029819865	0.05712796	1.21E-05	0.084134115	0.055971967	0.945961502	0.052610279	0.056577396	0.028252463	0.063655752	0.102603903	0.289852485	0.103711212	0.108366958	0.317006408	0.09941031	0.111541864	0.002845388	0.024137094	0.045364463	0.264204211	0.09563774	0.082301642	0.001157073	0.07438865	0.04694065	0.032920231	0.015930265	0.066666667
CTSS	-	Alu	no-conserve	0.031471333	0.010600083	0.005959623	1.06E-07	0.012858604	0.007135777	0.338464721	0.011315138	0.007440476	8.48E-09	0.020253854	0.006028862	0.544284559	0.007411899	0.006455094	1.86E-10	0.009914225	0.004655795	2.61E-06	0.008377976	0.002087694	0.438432795	0.01343858	0.011669934	3.44E-11	0.015841429	0.025044902	0.198089743	0.01948961	0.022524445	0.052936244	0.008852952	0.005991452	1.10E-05	0.014475414	0.006936386	0.720297149	0.007763484	0.010229494	0.048016493	0.012730596	0
CTSS	-	Alu	no-conserve	0.034409563	0.004738963	0.002786927	0.021808939	0.007538862	0.006096732	0.017754429	0.005564632	0	4.12E-05	0.008123746	0.002945684	0.001089767	0.004922143	0.01073742	0.579316597	0.007963576	0.008812159	0.411346824	0.005138462	0.007665781	0.004774484	0.01196343	0.01570355	0.796438127	0.008037472	0.007648096	0.045555069	0.009542303	0.007425481	0.017665966	0.005291163	0.002711426	0.610379358	0.006032961	0.005935526	0.518502401	0.005301249	0.005812271	0.586270886	0.005180369	0.001865672
CTSS	-	Alu	both	0.179615835	0.012612436	0.009600636	0.179529332	0.018433253	0.01679469	0.7046135	0.013359063	0.015947712	9.41E-06	0.019527854	0.010387887	0.071271194	0.014307831	0.017727849	0.692653584	0.016732379	0.017444139	0.19515765	0.014079163	0.017386799	0.373934746	0.019132133	0.021026591	0.968749089	0.018991725	0.018800278	0.224933716	0.019333045	0.01744598	0.290320836	0.014502873	0.0116566	0.099320815	0.014530188	0.012278168	0.214275797	0.014729315	0.016475097	0.043097218	0.012013571	0.022062732
CTSS	-	Alu	both	0.328959072	0.012646294	0.010634916	0.046398342	0.020564287	0.017769938	0.433392867	0.011445747	0.020408163	0.000106609	0.019250302	0.011025443	0.000129563	0.015808153	0.02873271	0.002461848	0.020761426	0.029680739	7.88E-05	0.013804568	0.026630667	0.05836749	0.020965103	0.024559551	0.040797612	0.020528439	0.017260112	0.048223919	0.021332887	0.016663305	0.100519297	0.015957831	0.018000768	0.389184031	0.012327932	0.014361972	0.046239983	0.016652203	0.013894814	0.010613393	0.007103353	0.019175082
CTSS	-	Alu	chimp	0.585835981	0.049758534	0.060446832	0.388439724	0.06300199	0.061237426	0.9035167	0.049609569	0.047709772	0.004197423	0.067689977	0.05423519	0.089413153	0.049248094	0.060861862	0.770108721	0.060419559	0.064719095	0.012381563	0.052837534	0.070790067	0.070736461	0.063565109	0.07045136	0.5588323	0.057890267	0.059298196	0.666159179	0.063202613	0.064465636	0.297758041	0.057823016	0.061848781	0.68548688	0.065817635	0.063609414	0.255718967	0.052191956	0.056895863	0.0202557	0.051644675	0.085784341
CTSS	-	Alu	both	0.260088571	0.060999588	0.05985101	0.453480108	0.082956763	0.080952678	0.227379962	0.059933981	0.040071427	2.62E-05	0.100668804	0.078377608	0.000240271	0.054737228	0.084522025	0.494019922	0.07731826	0.0834465	0.252139893	0.063283832	0.075997352	0.355580185	0.076553761	0.080419654	0.909578788	0.075297805	0.07616141	0.698485629	0.091244943	0.08852858	0.447356725	0.073103792	0.067981953	0.833672617	0.096047741	0.095006437	0.459540358	0.066540875	0.064597388	0.802426503	0.077970583	0.082058583
CTSS	-	Alu	both	0.036405484	0.017148905	0.012128921	0.025291913	0.024517129	0.021070733	0.020912623	0.018948242	0.00304414	2.23E-06	0.034842607	0.019255455	0.00377762	0.014349386	0.026786837	7.26E-06	0.023309923	0.017382128	0.587865222	0.018544401	0.024652759	0.528056211	0.023483811	0.025412777	0.011059966	0.02415235	0.027528404	0.894840562	0.032034041	0.03172294	0.15354036	0.019061997	0.014524473	0.804134914	0.024671889	0.024775647	0.830578927	0.017745297	0.019471562	0.854218852	0.022232317	0.020872202
CTSS	-	Alu	rhesus	0.792840777	0.025228091	0.025963111	0.332723474	0.029081917	0.030169686	0.195960941	0.026619706	0.014562212	0.238097084	0.025809255	0.02520647	0.200784704	0.02261834	0.02755704	0.676189264	0.028700312	0.030331412	0.166565413	0.030362889	0.027142719	0.435020664	0.03514832	0.03152152	0.011998641	0.029102554	0.025827923	0.500459731	0.026930107	0.027430853	0.025637541	0.025432657	0.033093126	0.544525353	0.044980796	0.045065818	0.84802048	0.028077901	0.030470199	0.49986698	0.047481991	0.061213908
CTSS	-	Alu	both	0.8973505	0.095234605	0.095464333	0.020103392	0.112392064	0.118298838	0.107135725	0.099465641	0.133599328	0.669873936	0.120922965	0.123328653	0.073891293	0.096004248	0.116283736	0.000428707	0.111748878	0.128879769	0.007818753	0.111393093	0.140119176	0.102395912	0.124489891	0.116145694	0.329546358	0.104467123	0.101883063	0.668830757	0.122996258	0.124472773	0.171871223	0.11731435	0.12524363	0.430125961	0.150104959	0.142244837	0.024912063	0.110056887	0.103001143	0.046835434	0.132836091	0.197485026
CTSS	-	Alu	no-conserve	0.029306975	0.008192345	0.004290038	0.000363156	0.009149673	0.0063516	0.009007499	0.009718806	0.033486245	0.484875373	0.011178744	0.008992669	0.840458391	0.006510419	0.006223641	0.103212668	0.008404718	0.009048042	0.043807651	0.008428719	0.007922168	0.00736274	0.00909477	0.006266259	5.78E-09	0.009727699	0.014259469	0.003430917	0.011396823	0.015932038	0.759490733	0.009732746	0.007540677	0.161858933	0.011527433	0.011021695	0.010481589	0.00693332	0.010738425	0.761690773	0.00835801	0.010238429
CTSS	-	Alu	no-conserve	0.008631409	0.006961639	0.00304434	0.592098811	0.00783576	0.007719546	0.023163759	0.006867943	0	0.900038511	0.009952419	0.008972062	0.088723677	0.004293896	0.008681066	0.000494425	0.007216528	0.006628781	0.110029587	0.00796793	0.007621539	0.489658915	0.007766432	0.006829093	0.000173041	0.008097116	0.009907994	0.009681295	0.00932723	0.011800581	0.296569352	0.007622915	0.010757696	0.01298964	0.011505639	0.009235253	0.464165888	0.006499099	0.007249159	0.713443813	0.008227288	0.008695652
CTSS	-	Alu	chimp	0.441596533	0.070020433	0.065137168	0.272207502	0.081769259	0.078551022	0.054310804	0.066963575	0.104939271	0.130796673	0.084928664	0.079630973	0.281984225	0.063752192	0.073662824	0.412510464	0.076555558	0.080252583	0.949082014	0.068845533	0.076001339	0.382976505	0.07830755	0.07540202	0.164355693	0.072187887	0.075596444	0.867321187	0.079290945	0.078949947	0.450990982	0.074354129	0.070982996	0.074757646	0.0901033	0.099246397	0.167860766	0.07205939	0.077369061	0.105664527	0.085525784	0.122503572
CTSS	-	Alu	both	0.797555969	0.036352397	0.042069883	0.003015447	0.050043433	0.055241248	0.005730144	0.037739747	0.075053434	0.326765964	0.053013252	0.048580948	0.000983115	0.043191744	0.061558379	0.001547101	0.053352358	0.06516004	0.000288678	0.045036331	0.069534828	0.274755608	0.048346408	0.053553232	0.49979246	0.045593994	0.04421561	0.902105612	0.053369467	0.05326262	0.070357862	0.049045903	0.055004664	0.004428336	0.060805002	0.050212603	0.631870931	0.046402739	0.047683381	0.522273816	0.047312986	0.06484846
CTSS	-	Alu	no-conserve	0.310642743	0.009672886	0.006958036	0.271052703	0.010862791	0.012396601	0.85132056	0.00891747	0.009513742	0.040501421	0.013430395	0.010046993	0.023325045	0.008488505	0.014393156	0.037110405	0.011001106	0.013897475	0.013439453	0.010342261	0.018055747	0.883004874	0.009788713	0.010356222	0.079023044	0.011274965	0.012512737	0.397321884	0.012426752	0.010479756	0.165869491	0.010728349	0.012781931	0.3133505	0.00961576	0.013626174	0.10391961	0.009888227	0.011608292	0.809493388	0.006786891	0.014112903
CTSS	-	Alu	no-conserve	0.179232293	0.00398783	0.002491862	0.059576246	0.006061428	0.004885265	0.057516434	0.00421978	0	0.006426704	0.006402005	0.003302471	0.044232931	0.003860011	0.002204893	0.000389145	0.005328749	0.004228476	0.765928369	0.003863403	0.006088858	0.661539383	0.005019572	0.004942488	0.003824002	0.00553149	0.006622187	0.733604586	0.007097183	0.007043073	0.01223214	0.004346593	0.00601472	0.008506467	0.005514789	0.004005204	0.350638518	0.004036119	0.004243686	0.345569566	0.004391613	0.010090661
CTSS	-	Alu	no-conserve	0.553633747	0.016719348	0.017897923	0.721132692	0.024426884	0.024530904	0.98387851	0.016897758	0.014702945	0.070467361	0.021723296	0.019305031	0.052695383	0.020019659	0.027752598	0.096269472	0.023992611	0.028853283	0.000692672	0.01805	0.027674389	0.117883848	0.020631186	0.022952722	0.287751494	0.021217993	0.019565929	0.893386958	0.023315168	0.023618767	0.744261266	0.022758037	0.023266596	0.404289593	0.025576298	0.025861305	0.906007339	0.019009169	0.021252068	0.561900688	0.020729838	0.015828118
CTSS	-	Alu	no-conserve	0.60254267	0.026653737	0.026235329	2.49E-06	0.04107099	0.052119979	0.36579764	0.026462972	0.058162268	0.004211077	0.041148054	0.032520636	4.81E-05	0.027578968	0.053226596	0.000197303	0.041323336	0.052491593	0.000264775	0.033535878	0.04955857	0.057541635	0.03278185	0.037528759	0.679679031	0.038389991	0.038582928	0.40977109	0.042604951	0.04545051	0.034944564	0.038145255	0.046465027	0.09551757	0.036080134	0.033409105	0.691074216	0.040237617	0.040632659	0.02483503	0.024021038	0.047192335
CTSS	-	Alu	chimp	0.043602997	0.016500467	0.024958176	0.112964067	0.023578993	0.026824745	0.652735663	0.015602596	0.018811301	0.487599501	0.019868251	0.017446995	0.025030594	0.016319351	0.025249459	0.04980976	0.024270681	0.029534451	0.053387269	0.018883384	0.028020637	0.007288262	0.020191828	0.025146186	0.013071704	0.020945104	0.018557566	0.359618367	0.02315493	0.020863477	0.335809674	0.022614245	0.025272696	0.201228335	0.019149242	0.017051889	0.525529238	0.021576619	0.02126896	0.556329305	0.015318488	0.017136702
CTSS	-	Alu	no-conserve	0.798602935	0.013743084	0.013098811	0.523025695	0.019495206	0.019879685	0.15963724	0.011892584	0.004761905	0.001588078	0.018418591	0.011656762	0.770284805	0.017067215	0.016975114	0.950866081	0.019160482	0.018925861	0.008249641	0.016320031	0.025689411	0.002598266	0.018321578	0.022343324	0.788978018	0.016172877	0.015890861	0.308250204	0.01874052	0.016866398	0.270647149	0.017043498	0.018316207	0.008965743	0.016534816	0.014409609	0.767495561	0.01611783	0.017119085	0.412120451	0.011871056	0.007092199
CTSS	-	Alu	no-conserve	0.058788266	0.015115296	0.011828768	1.57E-05	0.022541976	0.016109507	0.761531846	0.016238994	0.016056759	7.18E-10	0.027322155	0.011640696	0.320807422	0.016113218	0.016430736	0.000298891	0.01933652	0.015208812	0.398746141	0.013393095	0.016978523	0.369251617	0.025421509	0.027249586	0.000963374	0.021516358	0.02527466	0.884684008	0.027381693	0.027262658	0.692307959	0.015472056	0.012877344	0.978458754	0.022916257	0.0245158	0.344887065	0.014551197	0.014175145	0.719536263	0.017500138	0.011910861
THEM4	-	Alu	no-conserve	0.739806321	0.008127924	0.010233202	0.016715842	0.008836093	0.006983355	0.570184552	0.003898839	0.008474576	0.963172319	0.006786974	0.008342393	0.126532937	0.004366848	0.006814261	0.420888229	0.008917912	0.007712597	0.363782601	0.006692998	0.005952629	0.123244829	0.008717934	0.008847371	0.507303833	0.00576115	0.007020025	0.071273668	0.00524361	0.012205514	0.061806364	0.008213054	0.003620694	0.717800306	0.012027469	0.011663848	0.266294616	0.006361212	0.004120256	0.09160571	0.022924699	0.061282468
THEM4	-	Alu	no-conserve	0.899489971	0.013450276	0.015465846	1.59E-05	0.025112577	0.015552877	0.500128586	0.01634728	0.02987013	0.00459643	0.021023531	0.010416472	0.027706391	0.014060574	0.024141963	0.000413656	0.026169469	0.037319433	0.000614246	0.017640391	0.030168142	0.339187288	0.020809502	0.021506346	0.232355145	0.019119904	0.016150759	0.172279014	0.017136041	0.02121313	0.64626606	0.02339416	0.020290375	0.001295967	0.042013345	0.025649562	0.043599412	0.021311224	0.015129743	0.15986691	0.028271468	0.053713528
THEM4	-	Alu	no-conserve	0.763688484	0.005263065	0.004376829	0.011684238	0.010623804	0.007622905	0.25495705	0.007122881	0	0.292552334	0.008308849	0.006469245	0.073575047	0.004782292	0.007440951	0.069535023	0.010219955	0.011256035	0.005818512	0.005563254	0.010058132	0.014206747	0.008147573	0.005045425	0.02295329	0.007801847	0.004853063	0.154566335	0.007736684	0.011562984	0.667438046	0.007705052	0.006883192	0.69599121	0.016237892	0.02036253	0.923131245	0.008956078	0.007648778	0.887749208	0.012251239	0.00862069
THEM4	-	Alu	no-conserve	0.352456744	0.013142885	0.017737163	0.007743064	0.020325016	0.017343891	0.284499328	0.013336291	0.029119733	0.217989748	0.019970621	0.013903848	0.051511644	0.014515456	0.022061747	0.002112192	0.022494078	0.028637506	0.143864602	0.016911872	0.020131502	0.263023532	0.016428236	0.017091698	0.731711403	0.016320679	0.018193988	0.720005574	0.015588824	0.014736333	0.421643317	0.022387317	0.020418739	0.018686842	0.044071409	0.029859866	0.396481981	0.019685684	0.017242344	0.901035212	0.030283426	0.028629032
THEM4	-	Alu	no-conserve	0.876836019	0.010867859	0.009616912	0.000372925	0.016384877	0.010563114	0.289705907	0.013788559	0.031166091	0.357384686	0.017326773	0.014279369	0.002057715	0.012081992	0.026531276	0.002120841	0.016446686	0.023948495	0.697614048	0.015573943	0.015227591	0.016242167	0.013380892	0.014925594	0.125374333	0.014244105	0.013906741	0.881507881	0.013017085	0.012017316	0.087162949	0.015385269	0.014053411	0.075203456	0.036661759	0.032836484	0.898155961	0.014704542	0.014223161	0.670078617	0.022434485	0.02862069
THEM4	-	Alu	no-conserve	0.237252073	0.007981845	0.008369518	0.008536768	0.015781114	0.012142854	0.743586745	0.008102564	0.003703704	0.133730526	0.010824664	0.008175305	0.060687243	0.008202296	0.011547054	0.002269785	0.017617653	0.024456046	0.000196462	0.00902915	0.017224052	0.480752789	0.015172223	0.0189589	0.307383877	0.011147167	0.012307007	0.001314994	0.010870282	0.02128818	0.980044999	0.011706012	0.013160355	0.028627228	0.018162171	0.012552231	0.409571869	0.011252822	0.00950305	0.298541482	0.010083822	0
THEM4	-	Alu	no-conserve	0.548968467	0.015562344	0.013564409	0.000547095	0.021814327	0.01436459	0.474071299	0.016414673	0.006802721	0.200361035	0.021982867	0.015509078	0.340334344	0.023497945	0.026601762	0.048035433	0.018946852	0.022359828	0.328187927	0.017602601	0.017085902	0.762673725	0.016206764	0.024730289	0.799207826	0.017148548	0.019114439	0.040145323	0.01563967	0.026714816	0.457464501	0.022769172	0.018840113	0.250298929	0.059562813	0.050520427	0.183862674	0.019526569	0.016354474	0.494166578	0.037148285	0.048286409
ISG20L2	-	Alu	no-conserve	0.079716084	0.009067615	0.006067617	0.017701698	0.012665128	0.012893159	0.430273101	0.008316251	0.014654362	0.963336849	0.009855415	0.010128879	0.030428561	0.009509909	0.017135245	0.516861207	0.012127598	0.010055525	0.332394622	0.006621603	0.008855831	0.415818167	0.010489005	0.011252831	0.21523233	0.00773052	0.009049433	0.336824412	0.007217291	0.010591274	0.079670515	0.012127553	0.008419067	0.494533594	0.008095943	0.008242255	0.521542101	0.01325897	0.011419676	0.813426003	0.012272694	0.009615385
AGMAT	-	Alu	no-conserve	0.000335148	0.125872673	0.004385965	4.56E-09	0.092323743	0.004126984	0.101358871	0.167359438	0	0.019415285	0.072606311	0.009859585	4.08E-14	0.039560341	0.401705792	6.70E-07	0.306424447	0.381870358	6.38E-12	0.177682209	0.412103974	0.020462658	0.473026285	0.548338526	3.93E-06	0.095916966	0	0.010683643	0.090348136	0	0.004439526	0.071085217	0.041649216	1.61E-06	0.287000993	0.119970172	0.10470267	0.039448806	0.072447949	0.269468785	0.065916698	0
SLC35E2B	-	Alu	no-conserve	0.074512916	0.048429872	0.074124348	0.083796628	0.037942158	0.042674506	0.811846015	0.034333149	0.024781935	0.673991594	0.029551147	0.022859457	0.757360737	0.036384465	0.035786102	0.049431704	0.044348886	0.034609876	0.406647273	0.046908644	0.053912942	0.044635027	0.023731752	0.016971526	0.073189563	0.046061567	0.03950584	0.650800865	0.044630964	0.032544992	0.53846471	0.039807945	0.045223839	0.101711114	0.028416738	0.02246926	0.028204505	0.049525822	0.040644985	0.503173575	0.04122166	0.016919268
SLC35E2B	-	Alu	chimp	0.275627447	0.04393701	0.041249549	0.68691002	0.03789904	0.03814425	0.817497543	0.029285428	0.026401447	0.586318709	0.026197854	0.020847869	0.01368938	0.036578779	0.047267397	0.479890244	0.039205575	0.034248949	0.089978559	0.03853403	0.049713069	0.130187624	0.031592551	0.027499845	0.078170653	0.041726325	0.033644319	0.937767477	0.039518437	0.030399502	0.055646344	0.034929449	0.044223761	0.437005779	0.024662333	0.026301183	0.072565471	0.042826838	0.034221574	0.696657315	0.039793536	0.021305745
SLC35E2B	-	Alu	both	0.941621458	0.054338643	0.060918085	3.04E-14	0.076457001	0.039311949	0.189392148	0.053428837	0.01747412	0.004653471	0.06656852	0.037997656	0.021903423	0.030357638	0.045245934	0.088206129	0.073296156	0.059721556	0.012960017	0.039390518	0.062229375	0.327726124	0.09340219	0.083921748	0.003890022	0.072013508	0.051889536	0.544199615	0.075545051	0.065310156	0.226531168	0.04990239	0.04573784	0.133540543	0.068300003	0.051362824	0.006178014	0.058449633	0.04343289	0.355772667	0.054321486	0.067201802
SLC35E2B	-	Alu	rhesus	0.388277615	0.016361054	0.010416032	0.031192909	0.020844157	0.015656325	0.407770163	0.013131865	0.001984127	0.844308912	0.015946677	0.016976341	0.176053286	0.011989638	0.015075065	0.050370165	0.016701664	0.018323012	0.257091857	0.013609907	0.017465192	0.006851861	0.019964941	0.009653841	0.000508997	0.017433423	0.011043628	0.266946836	0.017086156	0.018147631	0.827136779	0.016611274	0.017850135	0.856773251	0.013506736	0.015605607	0.626435723	0.016642721	0.018835137	0.21553898	0.015554153	0.021246953
SLC35E2B	-	Alu	both	0.513902639	0.21853815	0.256168571	5.96E-07	0.29424579	0.250739155	0.831938343	0.209359453	0.185922509	0.305724799	0.238918569	0.230980256	0.000525036	0.193050695	0.2583863	0.02594801	0.287734657	0.266667092	0.000410616	0.205588211	0.260829238	0.139980208	0.273037302	0.230978563	0.005692858	0.269976092	0.236935946	0.044767258	0.257552233	0.309445461	0.312313988	0.279000095	0.270290094	0.827280708	0.262321533	0.25507197	0.001427623	0.25498577	0.218328776	0.335278456	0.222541792	0.29004329
SLC35E2B	-	Alu	chimp	0.153618531	0.039386785	0.046616732	4.91E-06	0.056271912	0.037042806	0.415289422	0.037822868	0.017647363	0.002204472	0.042989169	0.020810284	0.032136103	0.032002631	0.041828764	0.69254417	0.054697443	0.049840677	0.010408396	0.032559704	0.04092959	0.078739604	0.065847516	0.050074789	0.000391218	0.05368669	0.033376466	0.160067054	0.03953257	0.045905999	0.560829358	0.04425137	0.040729221	0.097589956	0.054352962	0.038271429	0.004837434	0.045721081	0.031891067	0.856626847	0.051234843	0.043039264
SLC35E2B	-	Alu	chimp	0.899306081	0.015673603	0.026181624	0.000113009	0.020563134	0.013326117	0.859662404	0.014879041	0.005535548	0.131061504	0.012283631	0.005339227	0.02759243	0.008761579	0.012405657	0.830942018	0.020728334	0.020276013	0.128745487	0.01127779	0.012440678	0.168227535	0.019166665	0.021856149	0.198977135	0.019274736	0.015632229	0.077037106	0.014994878	0.024421164	0.106367929	0.017175679	0.014016237	0.842387709	0.019846026	0.021683832	0.24663507	0.018354725	0.014056024	0.002874573	0.015601016	0.0543357
SLC35E2B	-	Alu	both	0.975092008	0.019887535	0.01773929	0.000171521	0.029056357	0.020494142	0.313741919	0.024217933	0.006535948	0.662431593	0.021563085	0.016778917	0.247193933	0.020473631	0.026111458	0.086205632	0.022954648	0.02556532	0.028371068	0.018606958	0.025752152	0.00418902	0.02010525	0.009274568	0.834759169	0.02293947	0.024839651	0.370227514	0.022734335	0.024578811	0.024995274	0.028984747	0.020616331	0.575170751	0.029458906	0.028156818	0.406500522	0.025801064	0.022332776	0.464591215	0.031788367	0.034229284
SLC35E2B	-	Alu	both	0.818496111	0.319579341	0.335000011	1.21E-10	0.405578834	0.334460034	1	0.31844011	0.284617464	0.162850285	0.311790966	0.296462123	0.083455744	0.279564158	0.353713923	0.025908346	0.364583225	0.348734863	0.017310243	0.307226388	0.351808537	0.394369222	0.297044427	0.255184448	0.066614949	0.377089165	0.359956864	0.331193628	0.310941325	0.378038581	0.517302378	0.386997643	0.377276901	0.030307608	0.402253957	0.332599655	2.21E-06	0.393065123	0.31978855	0.231835888	0.319996659	0.450712531
SLC35E2B	-	Alu	both	0.086593478	0.042364244	0.022981416	0.013261722	0.054558579	0.046234539	0.455600428	0.041100533	0.022212372	0.556890214	0.043123969	0.033944125	0.444654977	0.042184509	0.045442507	0.832936207	0.048805756	0.047678562	0.04998962	0.042397961	0.050137411	0.170014304	0.0416027	0.036923553	0.269826408	0.051836964	0.044824617	0.784405689	0.041674016	0.037914955	0.53460256	0.049628895	0.049027635	0.882006414	0.056459602	0.0647553	0.239323471	0.055761238	0.049482175	0.715449027	0.050628275	0.057595183
SLC35E2B	-	Alu	both	0.490226719	0.043148545	0.10317235	0.002058747	0.048523115	0.058732174	0.200648698	0.029780848	0.088061466	0.99801626	0.037309655	0.029681086	0.098006949	0.029267712	0.035991186	0.000308799	0.063405023	0.043340147	0.44818704	0.042842719	0.046098066	0.000569973	0.037298636	0.017746519	0.356706699	0.044196995	0.051657083	0.009884711	0.044611508	0.074254666	0.699224762	0.054783907	0.066376968	0.359045911	0.064490275	0.099272679	0.007867539	0.03990537	0.029645296	0.072330463	0.044631633	0.108224621
SLC35E2B	-	Alu	no-conserve	0.000634344	0.083588798	0.036226918	3.60E-15	0.129324453	0.081032712	0.063718052	0.094169253	0.027449916	0.243062439	0.094527232	0.077256753	0.001599072	0.064033106	0.103844217	0.200599708	0.100463575	0.110024774	0.002153103	0.068749354	0.098106962	0.029273361	0.108355391	0.082329941	0.021098597	0.100121129	0.080805064	0.651815213	0.093762943	0.095450256	0.092797993	0.0946543	0.081556017	0.019409643	0.113986298	0.077059877	0.01114299	0.088832425	0.072622738	0.299925482	0.085218413	0.041269842
SLC35E2B	-	Alu	rhesus	0.015438562	0.047613219	0.023819317	9.61E-08	0.065958517	0.043802848	0.480862034	0.048993774	0.0269324	0.362181051	0.050888437	0.038763993	0.000122403	0.027074401	0.048622591	0.08729054	0.056408776	0.046750108	0.040819574	0.035216168	0.044664216	0.006460913	0.054160987	0.043480425	0.004086534	0.058790837	0.04149739	0.383545203	0.050024909	0.060258303	0.126743282	0.048931958	0.041182344	0.235573555	0.07498151	0.056654723	0.000532575	0.047740299	0.031275996	0.527843748	0.050397567	0.028334787
SLC35E2B	-	Alu	both	0.059926626	0.028110668	0.072003949	0.575030513	0.033476663	0.034636324	0.823781734	0.020827569	0.01718794	0.22504095	0.022211993	0.024695064	0.050654981	0.017173029	0.024532538	3.43E-05	0.046849838	0.027815823	0.59260623	0.021356584	0.019113705	0.074778894	0.024005796	0.020019342	0.000220101	0.030654168	0.04806585	0.000108838	0.02794399	0.06187093	0.732117395	0.031105876	0.030026966	0.850605026	0.031160562	0.046076474	0.007853632	0.026472073	0.016648525	0.016026561	0.020262107	0.115277778
SLC35E2B	-	Alu	both	0.81089398	0.022360849	0.02162936	0.000140449	0.025956307	0.01507223	0.486556991	0.017490025	0.00591716	0.92997973	0.020539429	0.016272449	0.009557701	0.01184819	0.020387361	0.426816746	0.023328851	0.019721044	0.51178676	0.016492785	0.017406173	0.036194766	0.024635964	0.022113187	0.631960778	0.026072271	0.02437495	0.996881889	0.018916854	0.013340941	0.375186245	0.022844134	0.026180171	0.1724707	0.033924167	0.02269441	0.03667501	0.02086532	0.013985196	0.18713808	0.023601641	0.041180556
SLC35E2B	-	Alu	both	0.283991679	0.182411802	0.150934114	2.45E-21	0.207688167	0.117931507	0.125429882	0.166708301	0.075860537	0.001514514	0.165117838	0.102706253	0.023276156	0.133916723	0.176305868	0.031320516	0.205983881	0.180550978	0.34693132	0.155991926	0.16169254	0.03243563	0.196766783	0.140720017	1.85E-05	0.205371833	0.152423877	0.464760873	0.176371933	0.161301974	0.258379586	0.183453528	0.195064733	0.000284675	0.227330746	0.143093627	2.89E-11	0.191251085	0.11624018	0.283427723	0.177208034	0.261868687
SLC35E2B	-	Alu	both	0.778521137	0.106402614	0.093052948	9.17E-08	0.124150054	0.095183551	0.931414879	0.099231623	0.089184491	0.435065349	0.10501281	0.08902436	0.605732666	0.102106092	0.108258079	0.368389616	0.13191649	0.124163754	0.132633352	0.102939437	0.114261121	0.070842872	0.119253394	0.098967679	0.035794976	0.117821052	0.097819774	0.747361597	0.109854089	0.100604538	0.003327265	0.135789961	0.108593016	0.000327495	0.12415295	0.075362102	0.011337739	0.129131586	0.104300028	0.387801887	0.106163388	0.069145382
SLC35E2B	-	Alu	chimp	0.756039027	0.051273304	0.054047322	3.37E-08	0.080054339	0.056486941	0.850502609	0.055785415	0.052488688	0.401422855	0.058519545	0.049122634	0.196071314	0.049763844	0.058845205	0.962749489	0.072090397	0.073564233	0.000921221	0.049326958	0.069839959	0.619106675	0.073899473	0.080738596	0.520409954	0.065520915	0.062630064	0.507723013	0.061914662	0.054776098	0.192573869	0.069322764	0.064096327	0.076005535	0.064378485	0.055760452	0.018143797	0.066662909	0.055093133	0.549105459	0.055462346	0.037012987
SLC35E2B	-	Alu	no-conserve	0.201459998	0.038649683	0.024654528	1.88E-07	0.057774699	0.039269587	0.846723851	0.043560592	0.03582702	0.253848206	0.040830107	0.0486861	0.08332896	0.038134771	0.045972943	0.623906686	0.050187092	0.046947136	0.001112572	0.031154786	0.052863168	0.359281748	0.052181525	0.050911746	0.249219882	0.047748998	0.039539335	0.140433397	0.040520782	0.047130603	0.339895663	0.046925002	0.042751003	0.015155488	0.052091348	0.034661578	0.00936823	0.048398778	0.036129372	0.118543986	0.038166885	0.06142124
SLC35E2B	-	Alu	rhesus	0.789416586	0.014521684	0.013097182	1.98E-08	0.024668472	0.012331564	0.451935075	0.014892673	0.003333333	0.185544499	0.014686666	0.00798182	0.002236886	0.010093977	0.016572604	0.002109731	0.017315427	0.01035015	0.085366604	0.011634968	0.015358898	0.176120663	0.017912546	0.029754844	0.675944401	0.017466009	0.016974129	0.531833164	0.015714423	0.01405946	0.136821034	0.016082142	0.01203459	0.002086761	0.020380819	0.007907982	0.907764472	0.018005372	0.021971708	0.55985834	0.015411057	0.016993088
SLC35E2B	-	Alu	chimp	0.794192576	0.02857878	0.024961988	0.000104046	0.034416845	0.021265536	0.725472791	0.029702482	0.010258204	0.219339558	0.031025656	0.018601372	0.002179152	0.017707546	0.03865437	0.247207078	0.037721888	0.030262792	0.013757587	0.019056693	0.026690559	0.002796635	0.038400859	0.026499703	0.001306676	0.035812899	0.023196592	0.870307986	0.033301209	0.025485249	0.010757921	0.018263828	0.029120044	0.127030271	0.021568073	0.015729351	0.092121476	0.029584258	0.022473214	0.982004185	0.012478974	0.007575758
SLC35E2B	-	Alu	both	0.008216911	0.044118137	0.013895396	5.98E-12	0.080818047	0.039674004	0.918355873	0.048023856	0.04559355	0.07572058	0.05234319	0.034463474	0.001352697	0.023906538	0.047496745	0.498123708	0.059712297	0.052038467	6.42E-05	0.025848221	0.05404934	0.521893371	0.091791956	0.079887735	0.010185337	0.064872566	0.042622351	0.29271506	0.049744961	0.059421166	0.005440697	0.043477866	0.032320783	0.106354709	0.05959418	0.042266548	0.000435123	0.051743857	0.032166534	0.87539411	0.03489489	0.05239899
SLC35E2B	-	Alu	chimp	0.392925247	0.031182789	0.02037871	3.39E-11	0.055929612	0.026437061	0.74573535	0.03139371	0.018867925	0.236119945	0.023307981	0.013652518	6.71E-05	0.011885003	0.033634533	0.656749098	0.033635443	0.031182063	2.10E-05	0.014504259	0.031389856	0.002210329	0.046376467	0.027779221	0.000882051	0.04395704	0.027424261	0.258496226	0.033274862	0.038610541	0.067246031	0.02503869	0.032326056	0.079433144	0.034865254	0.021611484	0.117852368	0.033478857	0.025138065	0.443600432	0.027624994	0.028827411
SLC35E2B	-	Alu	both	0.331828933	0.119395823	0.098296928	4.15E-05	0.14039938	0.097042488	0.475524717	0.083926788	0.038232601	0.032460398	0.113131503	0.077931331	0.015712044	0.097073118	0.091570864	0.02336666	0.14296597	0.109979502	0.036205631	0.080591643	0.133043439	0.003784104	0.126120306	0.083461532	0.01792024	0.147094059	0.111492179	0.038798287	0.126590414	0.168700188	0.461419908	0.120402584	0.151110159	0.022269329	0.082654287	0.050804083	0.315258942	0.118155319	0.107913464	0.396291262	0.088789746	0.158028455
SLC35E2B	-	Alu	chimp	0.568522899	0.014473671	0.011467693	0.058520223	0.01738793	0.013712827	0.171551102	0.0091169	0.018376068	0.123412108	0.013259844	0.007661864	0.038468081	0.008996853	0.013722175	0.623191689	0.01655656	0.01543221	0.123988914	0.008856182	0.009177773	0.088316447	0.009925082	0.009326441	0.036666533	0.016647717	0.013920876	0.025814372	0.00905994	0.01659692	0.838721755	0.012632627	0.013758882	0.421817634	0.018708762	0.015411108	0.01082956	0.014946399	0.008258941	0.191530541	0.011001072	0.019615385
SLC35E2B	-	Alu	chimp	0.020238237	0.018115919	0.006252652	3.59E-06	0.024317757	0.012695888	0.480798451	0.015974669	0.002824859	0.808162484	0.019155928	0.014722372	0.000481448	0.006842536	0.015165531	0.275621454	0.02206238	0.017948801	0.493800723	0.017747903	0.019371114	0.010931791	0.019118161	0.013218688	0.104669713	0.026825198	0.018922843	0.066581487	0.019009242	0.006596133	0.465738155	0.018814677	0.023986832	0.0298964	0.019720627	0.010278484	0.026518851	0.020045023	0.016792362	0.619405135	0.015453555	0.015555556
SLC35E2B	-	Alu	chimp	0.00542668	0.01634538	0.137043839	0.263851921	0.023718841	0.022322558	0.385216041	0.011774421	0.013057151	0.994470611	0.016850344	0.01350938	0.039248272	0.011225911	0.017721862	0.181143907	0.032036977	0.026849944	0.19497421	0.016964058	0.016977869	0.000328016	0.019692704	0.006986014	5.57E-07	0.026011776	0.06082558	2.73E-08	0.017016255	0.065697124	0.346112736	0.020783106	0.019442032	0.426007289	0.032172777	0.058546419	0.055525137	0.016753967	0.0117222	0.038513337	0.015471821	0.042338962
SLC35E2B	-	Alu	both	0.148051494	0.093827223	0.068541103	0.01326005	0.100579192	0.089643211	0.709553745	0.077569592	0.061322314	0.502769888	0.076834706	0.079732158	0.366346806	0.08447806	0.090821355	0.45508028	0.084631403	0.091202729	0.794667678	0.087565694	0.087384788	0.703148081	0.072862897	0.076330586	0.992614575	0.09082422	0.09317562	0.336446124	0.080157879	0.092266093	0.575169848	0.118701304	0.117246336	0.212341784	0.099555614	0.093811968	0.001875839	0.114739865	0.091005597	0.368302604	0.093608107	0.117965368
SLC35E2B	-	Alu	chimp	0.070663034	0.209343442	0.146158948	2.31E-05	0.274911699	0.237615554	0.951440344	0.190536104	0.17702891	0.975566204	0.195708605	0.20130641	0.263925129	0.18919384	0.227392557	0.708903464	0.225971399	0.232666115	0.034964685	0.193301626	0.229475219	0.213520843	0.196173559	0.165439004	0.822617795	0.228868491	0.233831374	0.019604902	0.191419211	0.249810743	0.945361397	0.286582789	0.284559867	0.062246669	0.257452735	0.206684948	2.40E-05	0.284164761	0.2299791	0.13674126	0.2304649	0.331339396
SLC35E2B	-	Alu	both	0.368624302	0.019349916	0.015729467	0.002010796	0.030547206	0.020558604	0.711471176	0.015960381	0.011829502	0.504817753	0.019171435	0.023106772	0.000143803	0.013603339	0.030910314	0.968332265	0.026460131	0.027086519	0.081157988	0.013251382	0.02225965	0.035886364	0.024705344	0.018358974	0.063496715	0.025569847	0.019630468	0.061633755	0.018604756	0.029287696	0.14755517	0.023212095	0.028996068	0.180092118	0.056937215	0.049297474	0.95028485	0.024241093	0.024496073	0.064762115	0.033874149	0.064069964
SLC35E2B	-	Alu	both	0.146325687	0.033403988	0.019913712	0.000163911	0.053228465	0.035155263	0.871927919	0.028863008	0.014832536	0.650755035	0.040400519	0.028882007	0.061733737	0.025052974	0.036654267	0.605074214	0.043385134	0.046179243	0.103018643	0.033574775	0.054284905	0.002157182	0.029783954	0.015356643	0.025887556	0.042078099	0.030767304	0.158545176	0.040298975	0.055996099	0.749762504	0.036800147	0.040171482	0.105466558	0.056179313	0.037860578	0.452348524	0.04099411	0.041227321	0.333563485	0.043879665	0.052140286
SLC35E2B	-	Alu	both	0.004065129	0.452777741	0.20203333	1.54E-09	0.73260179	0.671727961	0.933939837	0.466589233	0.483660131	0.327366491	0.405980972	0.520769868	0.016254794	0.514136461	0.701354317	0.207881888	0.642658246	0.689740422	0.888346402	0.529958895	0.586270357	5.15E-06	0.326954945	0.038181818	0.186623314	0.583888891	0.547342652	0.655301424	0.523228197	0.669994262	0.312666684	0.643285864	0.660197098	0.023295772	0.742223224	0.62434484	0.251586845	0.659247864	0.631356524	0.404190234	0.581540772	0.757423615
PIGM	-	Alu	rhesus	0.17077929	0.024600302	0.013560906	0.029965905	0.02787543	0.02440781	0.202423479	0.019221528	0	0.145334915	0.017424047	0.007570646	0.006180889	0.013957229	0.031387372	0.071399062	0.033841298	0.024483014	0.61226586	0.023591099	0.023464538	0.000859323	0.035079134	0.016195855	0.016162556	0.028456753	0.023800324	0.379802257	0.020742007	0.016414439	0.044323213	0.02208892	0.015078357	0.011776769	0.037105792	0.018069549	0.133792874	0.018276138	0.012896321	0.608646563	0.006482084	0
COPA	-	Alu	no-conserve	0.790040747	0.003732482	0.00449226	0.121871584	0.003551005	0.003369382	0.151227815	0.003182307	0.005307831	0.607980793	0.004016523	0.004582278	0.807516699	0.00338084	0.003683601	0.332270985	0.003176554	0.003598513	0.541446503	0.003742554	0.004244518	0.004777525	0.003447127	0.002667149	0.172654384	0.003999302	0.003366527	0.042966594	0.003451317	0.002819433	0.057728975	0.004074145	0.003341894	0.28798329	0.001134131	0.000955274	0.644621498	0.003752479	0.003848641	0.103136068	0.003394256	0.006958611
COPA	-	Alu	chimp	0.000622931	0.002522228	0.000401914	2.29E-05	0.002056966	0.001554158	0.936921394	0.00202208	0.001577767	0.031958946	0.002570428	0.001377036	0.636648022	0.001333839	0.000934696	0.233828215	0.001521282	0.00124859	0.802029269	0.0014672	0.001487663	0.05252889	0.002749106	0.002013554	0.65328437	0.001599159	0.002136704	0.069829111	0.001991976	0.002744054	0.121449415	0.001766569	0.00138128	0.087904561	0.002751352	0.002295704	0.360493569	0.001014619	0.001290641	0.102737145	0.002759647	0
COPA	-	Alu	no-conserve	0.112876521	0.003072998	0.002003901	2.70E-06	0.002748659	0.00199784	0.809217925	0.003005693	0.003319757	0.004227034	0.003452188	0.001997931	0.386039423	0.002027864	0.002473667	0.666693095	0.002519926	0.00230331	0.417463387	0.002574825	0.002998002	0.037898212	0.00430017	0.003686744	0.242505397	0.002875067	0.002614543	0.131441003	0.00281464	0.001832762	0.179456612	0.002570021	0.003186451	0.018818775	0.001506918	0.000905258	0.234895875	0.002355544	0.00203212	0.232682944	0.001783129	0.004753788
COPA	-	Alu	rhesus	0.013842307	0.00223119	0.00094661	6.45E-05	0.00225972	0.001510852	0.504132281	0.001872296	0.000952381	0.008663042	0.002731672	0.001513872	0.094050546	0.001420268	0.002549459	0.17701836	0.001619257	0.001476794	0.583178457	0.001966931	0.001554642	0.548179836	0.004152726	0.003979428	0.054778749	0.001853043	0.001691273	0.880851243	0.002265224	0.001886539	0.085852685	0.00142475	0.001091935	0.007277962	0.001415263	0.000916961	0.048833783	0.00136823	0.00091917	0.770064617	0.001690033	0.002631579
COPA	-	no-repetitive	both	2.13E-05	0.076225945	0.206778177	2.85E-48	0.110650097	0.32075255	0.209941444	0.046333467	0.357944862	0.017802018	0.11325409	0.081632355	2.10E-09	0.064069052	0.173373584	1.79E-08	0.22956925	0.15783687	3.29E-05	0.087461399	0.137313577	3.40E-12	0.070647668	0.183882108	3.77E-24	0.072548078	0.182813453	1.25E-08	0.079632261	0.213058896	3.51E-08	0.097429358	0.147767736	0.410515431	0.082084604	0.121850088	0.03469964	0.074053	0.054624176	0.004765621	0.042158137	0.324771844
F11R	-	Alu	no-conserve	0.001526074	0.075938471	0.030408763	2.75E-12	0.104326382	0.048958471	0.307471113	0.097919337	0.066666667	9.89E-10	0.100839943	0.034842275	0.00524895	0.020916078	0.043724339	0.001880119	0.099950981	0.064860634	0.088025265	0.055946264	0.066642121	0.462844372	0.148624747	0.160112608	0.104511154	0.099707253	0.075646128	0.760263744	0.081603684	0.068290532	0.950499795	0.048573888	0.046383478	7.18E-05	0.090548433	0.035538553	0.006677605	0.074151143	0.055006133	0.008323701	0.091405658	0
F11R	-	Alu	no-conserve	4.43E-05	0.056238648	0.011466651	1.83E-09	0.067971595	0.033683704	0.00843444	0.075153718	0	1.11E-06	0.070991033	0.028104364	0.10555577	0.026592015	0.040260901	0.95044363	0.068017588	0.061765585	0.006505094	0.040095087	0.06470829	0.760243082	0.100682683	0.102053388	0.435377158	0.072553513	0.061093327	0.975026691	0.064041489	0.058906992	0.428487931	0.046918576	0.046842123	1.99E-05	0.098442694	0.036014495	0.008823831	0.065309747	0.048813925	0.045070266	0.073129462	0.014705882
F11R	-	Alu	no-conserve	0.003765441	0.033266002	0.017724736	0.013412871	0.043533431	0.037721322	0.015159939	0.036861879	0	0.177028122	0.040061088	0.033426375	0.032168538	0.03013308	0.045552369	0.856547872	0.036488183	0.032772754	0.704940634	0.037549216	0.037853615	0.697026501	0.05267105	0.057588399	0.295265478	0.03693285	0.038418948	0.899613867	0.034298394	0.03134666	0.097569464	0.038622334	0.029511944	0.160547287	0.043918705	0.038217349	0.064349358	0.046019812	0.038167916	0.103408452	0.062805731	0.020833333
F11R	-	Alu	chimp	0.014155731	0.410927473	0.28314621	8.73E-13	0.410619182	0.272481894	0.302818076	0.494071293	0.234567901	1.20E-05	0.461402718	0.368612949	0.20963223	0.3040788	0.3478499	0.180589243	0.391661748	0.443560127	0.000270107	0.354360431	0.474560309	0.01778355	0.480446441	0.56940532	0.191653305	0.390857133	0.389294127	0.359499232	0.434289013	0.413016318	0.164871352	0.363210237	0.334597016	0.001383919	0.443196277	0.290331123	0.036709478	0.431154088	0.393588964	0.007571977	0.356319078	0.11013986
F11R	-	Alu	no-conserve	0.01155603	0.049910638	0.019859544	0.10444825	0.067023601	0.063864898	0.027784244	0.046904045	0	0.001858859	0.063015819	0.03567383	0.000329657	0.029560104	0.085386905	0.757500694	0.083422978	0.060061154	0.159927159	0.057747954	0.067069842	0.292752018	0.056559277	0.069852525	0.371079652	0.051300144	0.053549267	0.169936763	0.052202748	0.066193597	0.125513639	0.074163901	0.084807749	4.24E-05	0.082773224	0.035612468	0.00059102	0.058509289	0.035696002	0.230181242	0.085486261	0.072916667
F11R	-	Alu	no-conserve	0.023889993	0.100293261	0.063343442	8.36E-06	0.121938059	0.078950658	0.04754501	0.115663263	0.03030303	0.002996404	0.120034239	0.078281068	0.124925446	0.056626543	0.086033079	0.416924905	0.102877069	0.096351345	0.002895587	0.079767809	0.122765698	0.003343155	0.134437263	0.189884688	0.463127072	0.107904987	0.116835744	0.292184459	0.101236878	0.116319149	0.474808505	0.102703472	0.111959134	7.67E-06	0.174479672	0.082418744	0.000141882	0.104256786	0.065842038	0.031250024	0.130247114	0.03
F11R	-	Alu	no-conserve	0.003841138	0.07451002	0.036647015	1.36E-05	0.082022947	0.056462278	0.010909217	0.104097547	0	1.92E-05	0.113861711	0.054611806	4.14E-06	0.034590615	0.113709819	0.172258364	0.08517985	0.084169851	0.066164886	0.074442969	0.094614185	0.107451723	0.144361341	0.168884491	0.468280986	0.080463597	0.080493004	0.232751001	0.098011282	0.114868353	0.202156488	0.073263046	0.088788433	2.99E-06	0.142209428	0.055359201	0.000208745	0.097118307	0.057908031	0.194957677	0.102731956	0.056818182
F11R	-	Alu	no-conserve	0.015097373	0.115572085	0.063251267	9.30E-12	0.130231378	0.0587647	0.006455409	0.149512784	0	8.82E-10	0.131892582	0.044837294	0.003319782	0.044508593	0.086196127	0.155938793	0.118087754	0.080586659	0.003545712	0.059148354	0.094236413	0.901117722	0.151762884	0.15155774	0.060079421	0.118862257	0.088600493	0.529282215	0.130829916	0.130330045	0.609601128	0.071401719	0.079115328	3.06E-06	0.141541449	0.051291023	0.000449085	0.109296432	0.073198531	0.187823209	0.172407744	0.125
F11R	-	Alu	no-conserve	0.061895381	0.042655564	0.029410329	1.42E-06	0.078390751	0.05060349	0.016413172	0.045167717	0	0.000630769	0.04321284	0.022590431	0.001944131	0.021080447	0.048086846	0.732627152	0.054888832	0.048837504	0.039142031	0.037611064	0.050352429	0.517807267	0.065416787	0.054052608	0.587282857	0.067311632	0.061563324	0.523158757	0.052396412	0.073386181	0.022331469	0.039487493	0.051400941	5.20E-05	0.064988947	0.03114506	0.006735326	0.069179945	0.050332336	0.26049364	0.059432016	0.025
F11R	-	Alu	no-conserve	0.000275677	0.025685744	0.009440273	6.44E-29	0.02576858	0.006145284	0.098615727	0.028425888	0.010897545	2.59E-19	0.028016791	0.003162131	0.006170295	0.006823844	0.010110222	6.40E-14	0.02080734	0.008620609	0.172000812	0.009658865	0.007682759	0.071077629	0.032195217	0.024079767	1.25E-07	0.029435283	0.011571617	0.000609108	0.030443671	0.010746804	0.946595223	0.008019066	0.007167105	5.69E-07	0.020169393	0.007246034	1.72E-11	0.01435027	0.006692966	0.256302203	0.019388214	0.008828292
F11R	-	Alu	both	0.000372091	0.057518857	0.021195661	3.24E-30	0.066268506	0.020401576	0.812357468	0.067840416	0.049971425	5.43E-19	0.071699335	0.013739813	1.45E-07	0.014560227	0.028368313	1.47E-16	0.054426875	0.027283764	0.468623139	0.026490934	0.02324588	0.166672242	0.085681557	0.067707534	2.21E-07	0.072398145	0.034491821	0.017090057	0.071904996	0.040047174	0.747784679	0.022561486	0.020711333	1.70E-06	0.055496234	0.024804652	3.25E-07	0.035789107	0.022527262	0.866119214	0.044619991	0.035348105
F11R	-	Alu	both	0.006651659	0.012850341	0.014351413	1.41E-18	0.018395138	0.008671996	0.617057116	0.016381919	0.014999418	5.82E-15	0.016370614	0.005538702	0.009541027	0.004943295	0.007291462	0.001881743	0.012758809	0.009064896	0.222400326	0.007222441	0.008117824	0.596693152	0.016332577	0.01686473	0.00267703	0.015875855	0.010969248	0.08741862	0.01679215	0.011433376	0.817102048	0.007964704	0.008129354	0.003304977	0.015504928	0.010542354	2.07E-05	0.011838989	0.0086383	0.044166326	0.01522589	0.028230677
F11R	-	Alu	no-conserve	0.00325142	0.399890458	0.268958002	1.22E-36	0.420539214	0.221383366	0.083200302	0.459197913	0.330840196	6.21E-22	0.453368218	0.168400033	5.48E-11	0.159252202	0.282800934	2.81E-19	0.400745473	0.286701541	0.467713386	0.293255484	0.272687827	0.795555845	0.475584204	0.474306538	1.87E-15	0.418445712	0.272151007	1.87E-05	0.452159215	0.300608352	0.500072146	0.285572153	0.281083747	3.93E-08	0.407833285	0.263482804	1.00E-12	0.362039215	0.280033632	0.703438846	0.372382515	0.343942206
F11R	-	Alu	both	0.001265485	0.322386633	0.225156631	8.98E-31	0.314310961	0.207062798	0.445662934	0.330476265	0.298406412	7.48E-22	0.326582066	0.142345479	6.26E-10	0.159521122	0.25554595	3.73E-18	0.339211122	0.254648456	0.201019046	0.262791788	0.244569186	0.16170076	0.337754141	0.353824545	7.83E-13	0.313976533	0.231366165	1.83E-06	0.349548878	0.239134373	0.688051698	0.262355551	0.261686724	1.93E-07	0.285002646	0.197678077	2.17E-21	0.310876459	0.218721882	0.148010756	0.290855144	0.341105343
F11R	-	Alu	no-conserve	1.24E-05	0.020247622	0.006829531	1.62E-07	0.017810513	0.012601802	0.504962372	0.024069786	0.016735652	5.58E-15	0.0281481	0.010430261	9.81E-06	0.009776733	0.018678761	1.14E-06	0.024413538	0.015829944	0.571423641	0.013937569	0.015097986	0.027140415	0.029267788	0.03504607	0.003328279	0.022052405	0.016092988	0.024517846	0.021270806	0.014629178	0.074929958	0.012883598	0.014666992	0.00734289	0.03352165	0.030627188	0.044198969	0.017229523	0.014494239	0.045333059	0.026595572	0.009294842
F11R	-	Alu	no-conserve	8.39E-06	0.018303812	0.006471087	1.39E-20	0.019884831	0.008324011	0.190823101	0.021571205	0.033690943	2.72E-16	0.020441101	0.006386044	1.04E-06	0.003912156	0.010638343	1.32E-06	0.019504077	0.011864988	0.276684745	0.01217909	0.012761383	0.536039527	0.025764416	0.023795277	2.08E-08	0.022140293	0.011550755	0.008026239	0.021655453	0.012877904	0.612885684	0.008405614	0.00807874	6.52E-05	0.02904857	0.014696972	0.049098663	0.012815277	0.01073293	0.091256187	0.02811836	0.011301838
F11R	-	Alu	no-conserve	0.017065461	0.005798333	0.003148712	3.30E-08	0.007298178	0.004336545	0.851749421	0.007411833	0.008187135	2.02E-10	0.008987862	0.003101249	0.001510022	0.002684995	0.005162976	1.18E-05	0.008656422	0.004485306	0.019383211	0.004324951	0.007318025	0.454626379	0.010148974	0.008868345	0.706459592	0.00801382	0.007021109	0.284453725	0.00791095	0.006435755	0.360346972	0.003542651	0.004020495	7.69E-06	0.008084029	0.004395857	0.015856073	0.005337248	0.004201002	0.069038581	0.00781416	0.001736111
F11R	-	Alu	no-conserve	0.013396105	0.003759096	0.002236287	0.001483967	0.004809051	0.004488807	0.170941873	0.00409913	0.001759015	0.008834545	0.00419842	0.002792893	0.072223922	0.004300208	0.00498897	0.281789561	0.004266861	0.004223136	0.346904543	0.003809653	0.003706807	0.209626462	0.004931578	0.003978554	0.76208338	0.00453158	0.004244305	0.9809469	0.004081563	0.004313146	0.197887334	0.004254515	0.003380686	0.019112856	0.007477605	0.009046637	1.52E-05	0.004948773	0.003087239	0.348152994	0.007548472	0.004324697
F11R	-	Alu	no-conserve	1.76E-05	0.015825633	0.008996476	1.37E-13	0.014307179	0.008819055	0.667693292	0.016387293	0.013682376	1.03E-14	0.017432097	0.008309029	0.359546144	0.010381705	0.010306967	0.025267523	0.016228556	0.013003981	0.398889245	0.014088651	0.014315338	0.492352238	0.019084462	0.019963749	0.000232409	0.015872116	0.012219501	0.00747666	0.017460689	0.013357891	0.797341098	0.009949106	0.00997972	0.031640377	0.022183932	0.017778476	0.005602064	0.01185185	0.009703836	0.037494802	0.023295388	0.008934219
F11R	-	Alu	chimp	6.04E-05	0.046599038	0.027653141	5.03E-17	0.046694037	0.031086706	0.38223683	0.053608026	0.044580405	1.64E-14	0.062227747	0.03285684	2.14E-06	0.017716391	0.032272183	1.09E-14	0.058530003	0.037145478	0.699406532	0.040348143	0.038579068	0.028143952	0.068810111	0.077109065	0.008479495	0.054040348	0.047229545	0.363485175	0.055393345	0.05124066	0.257474767	0.028622449	0.026623305	0.00161035	0.062986974	0.044912847	0.004837291	0.034817564	0.031956474	0.90261179	0.05476061	0.05426285
F11R	-	Alu	chimp	0.015787967	0.006641429	0.008397157	8.39E-08	0.006209948	0.010866573	0.750329106	0.005541353	0.014397104	0.120076688	0.005837933	0.005260596	0.288461872	0.010844813	0.011308458	5.85E-13	0.018401318	0.007696193	0.596297713	0.009327817	0.007797078	0.08539247	0.005785264	0.00701167	1.85E-14	0.00543876	0.011604535	1.40E-09	0.005039323	0.012635474	0.720894542	0.011763679	0.01151849	0.04028889	0.005063943	0.008655937	0.000358777	0.006295643	0.004357119	0.858749772	0.004292574	0.004281537
F11R	-	Alu	both	2.23E-08	0.844480233	0.658288951	2.03E-54	0.835485653	0.649483268	0.003926768	0.859841159	0.685245643	2.76E-22	0.862758114	0.697153274	0.000570436	0.658278492	0.719008598	1.89E-13	0.802490971	0.742126876	9.44E-10	0.80573578	0.726418727	0.056707966	0.849500596	0.833917726	1.97E-23	0.827528603	0.705991502	6.57E-11	0.86032248	0.689016385	0.000120303	0.763742908	0.718408293	3.74E-12	0.837697115	0.654751468	2.12E-21	0.750033535	0.660428141	0.0014933	0.886291388	0.745557518
F11R	-	Alu	no-conserve	0.00017888	0.005181218	0.001744737	3.15E-10	0.004871411	0.002507326	0.387587966	0.005658316	0.005747126	8.69E-08	0.005596827	0.002151619	3.41E-05	0.001455167	0.004159352	0.17579229	0.005357447	0.003681719	0.835027634	0.003080357	0.002792407	0.477587417	0.005832324	0.006615412	0.082225621	0.005519137	0.004059617	0.064992377	0.006697473	0.004602132	0.374676844	0.002708547	0.003128403	4.97E-05	0.006314501	0.003113003	2.64E-06	0.004827697	0.002476002	0.297113465	0.006699476	0.002995484
F11R	-	Alu	no-conserve	4.77E-05	0.007401538	0.003852766	2.84E-18	0.008360707	0.003265528	0.008750953	0.009381065	0.001048218	1.12E-09	0.008596946	0.003668415	6.81E-05	0.003308466	0.006696832	0.005887574	0.007792062	0.005105544	0.442701834	0.005966979	0.005279238	0.843743961	0.01093448	0.011797281	0.019560118	0.010830797	0.008326402	0.223517621	0.007863548	0.005987068	0.8722728	0.00480711	0.004312472	0.010291231	0.010883218	0.011165356	0.000642242	0.006970749	0.005033175	0.485871595	0.010679384	0.011064314
F11R	-	Alu	no-conserve	5.14E-06	0.010926168	0.00352384	1.51E-16	0.015316938	0.007081854	0.87558017	0.010050707	0.00943497	1.17E-08	0.009204581	0.004114184	0.00263367	0.003919103	0.006560831	0.000698624	0.011677318	0.007568069	0.487337565	0.006710141	0.007513001	0.595067753	0.010726243	0.009776719	3.99E-07	0.013575874	0.007538617	0.064766914	0.012398324	0.010507331	0.25922014	0.00617134	0.006686532	7.18E-10	0.014137737	0.005221724	1.49E-08	0.010140662	0.005717623	0.702929994	0.014707604	0.016260163
F11R	-	no-repetitive	no-conserve	6.11E-05	0.032995728	0.012613931	2.23E-26	0.032623095	0.009263976	0.678750915	0.027514311	0.018812931	1.08E-13	0.022465492	0.005863526	0.000228691	0.008348946	0.0163972	1.80E-06	0.022498293	0.012371933	0.308964599	0.011754756	0.014473025	0.00221615	0.027783123	0.017807992	2.10E-12	0.035358233	0.013110081	0.001119161	0.031109551	0.013283713	0.18226229	0.010943471	0.013172244	1.66E-07	0.021085476	0.007573268	8.09E-12	0.016690005	0.006104938	0.147831525	0.022255514	0.007633588
F11R	-	no-repetitive	no-conserve	0.004605035	0.006591621	0.003030235	6.61E-12	0.006927924	0.003141561	0.010465005	0.005003892	0	2.48E-05	0.005236779	0.002976137	5.66E-05	0.001430077	0.003192305	0.000707368	0.006014884	0.002879689	0.679167934	0.003222229	0.002985521	0.049148713	0.004537129	0.003442521	4.54E-07	0.007723377	0.003691611	0.066890709	0.007142457	0.004794354	0.023183157	0.003214319	0.004109189	0.062411011	0.003848995	0.004756957	0.006650291	0.004576859	0.003106034	0.736033614	0.0040372	0.004693224
F11R	-	Alu	no-conserve	0.00274639	0.013502105	0.008196506	0.034332014	0.016896218	0.014716365	0.006458391	0.013411259	0	0.007966152	0.018318182	0.01340928	0.034910096	0.013375857	0.017424346	0.231474177	0.018500654	0.019694959	0.911964009	0.01651382	0.014965584	0.554420895	0.016773542	0.019153832	0.016445451	0.014622484	0.019009936	0.036475623	0.015513872	0.018860816	0.917385523	0.020330359	0.018874043	0.186287483	0.017395757	0.016596571	3.93E-05	0.017401581	0.010896167	0.629637662	0.015663691	0.010807473
F11R	-	Alu	rhesus	0.117694441	0.008828206	0.00668743	0.00151022	0.011673999	0.009527374	0.009608414	0.009525175	0	0.169668064	0.010606175	0.008610511	0.091274468	0.013861898	0.014165453	0.059538468	0.012061191	0.013375313	0.000612048	0.010659322	0.017268211	0.065215156	0.012959489	0.018911336	0.026287985	0.010550007	0.013513099	0.000247912	0.009593307	0.016248664	0.7617775	0.015309767	0.013522784	0.07397068	0.010180532	0.007082906	4.24E-05	0.015296331	0.009471825	0.770881776	0.012862036	0.016465054
F11R	-	Alu	no-conserve	0.00243934	0.021051294	0.013329641	0.000248802	0.021461967	0.016669895	0.005376442	0.020934251	0	7.88E-06	0.021277045	0.013112825	7.82E-05	0.01092299	0.023953314	0.016867978	0.020786112	0.024294157	0.515690132	0.023169196	0.020205861	0.266047349	0.021619923	0.019813408	0.136015941	0.024848532	0.020547921	0.335125492	0.019296878	0.016583134	0.964196711	0.020131779	0.020120624	0.001151233	0.033460781	0.020763193	0.896852526	0.019802454	0.019901749	0.570607582	0.028294549	0.02020202
F11R	-	Alu	no-conserve	0.010042358	0.037721539	0.027098577	0.232289217	0.037071744	0.035840467	0.060935747	0.036180023	0.012345679	0.007338277	0.051967003	0.043822392	1.79E-05	0.02452449	0.04318465	0.519560157	0.044200846	0.045704481	0.492418691	0.039210221	0.040021645	0.62657839	0.042250041	0.044350248	0.004404757	0.038920797	0.045560317	0.834224191	0.046569284	0.04548429	0.043094558	0.03907525	0.044280323	0.316797971	0.048671287	0.044089574	0.422764782	0.040463897	0.04248812	0.080541974	0.034171593	0.01016193
F11R	-	Alu	no-conserve	0.092614858	0.020121192	0.016991988	0.541120265	0.030684057	0.032872982	0.044407867	0.022376062	0.035249774	3.26E-05	0.024463435	0.018556343	0.355249449	0.01873142	0.021090159	0.154905625	0.03123445	0.035407081	0.039314145	0.02235037	0.027885763	0.012900988	0.02759501	0.034393863	0.002307631	0.021921314	0.025761626	0.012086535	0.022366048	0.029230732	0.182948083	0.028516386	0.024856408	0.00070329	0.021199793	0.014505477	1.44E-07	0.029058758	0.019871119	0.033038449	0.020392351	0.002688172
F11R	-	Alu	rhesus	0.000615154	0.008757387	0.003721391	0.00067004	0.011603129	0.008800419	0.259905753	0.010732951	0.006060606	1.76E-08	0.01144361	0.005105915	0.066818799	0.006112066	0.006889222	0.037225419	0.011952449	0.008594075	0.010355559	0.005605309	0.007953955	0.120919994	0.016238407	0.017191367	0.750574319	0.012378315	0.010668972	0.675516514	0.009993777	0.009494956	0.603610825	0.006979519	0.006698666	0.140119722	0.009884616	0.012630008	0.00625682	0.010039972	0.007442062	0.045182811	0.00830734	0.051573427
F11R	-	Alu	both	7.69E-05	0.156566307	0.071563296	7.04E-28	0.173575669	0.083915545	0.660359755	0.163062138	0.168977511	1.85E-16	0.185348987	0.063938002	6.93E-09	0.056145388	0.120331786	1.55E-14	0.161116591	0.106788669	0.883113568	0.102013746	0.104529372	0.650828498	0.175645098	0.168311592	3.55E-08	0.194451993	0.125732847	0.023939917	0.186077265	0.131828107	0.82027055	0.102161789	0.102547401	6.46E-10	0.155473784	0.072122499	4.14E-09	0.141553767	0.097342645	0.187227264	0.136975463	0.077855365
SLC35E2	-	Alu	no-conserve	0.049921552	0.09498613	0.05060245	0.513161777	0.089120434	0.079662228	0.288415326	0.065584677	0.141369048	0.557532919	0.041849249	0.038890029	0.561995977	0.08396053	0.088851543	0.247706435	0.097678915	0.079697905	0.207964814	0.108452358	0.078537002	0.000268441	0.047188397	0.010547683	0.097976325	0.102443236	0.078676473	0.686178837	0.078186177	0.075097078	0.20979839	0.092552342	0.117925684	0.199425576	0.114427526	0.114314801	0.008374037	0.113067421	0.083396278	0.842359097	0.091994615	0.079831933
SLC35E2	-	Alu	no-conserve	0.338283873	0.062797869	0.04929661	0.597954264	0.07844355	0.082532638	0.706468904	0.058563818	0.069852941	0.346387691	0.036261703	0.041516186	0.013347387	0.058400166	0.082973067	0.281853558	0.079164708	0.078502687	0.195708527	0.076721813	0.076821294	0.002418107	0.038089228	0.009653902	0.12541385	0.080377419	0.069036169	0.927251544	0.065642116	0.069398915	0.94373428	0.071310322	0.086118045	0.233978859	0.103322534	0.092882662	0.088702796	0.086487217	0.070432747	0.793866744	0.080022098	0.087893297
SLC35E2	-	Alu	no-conserve	0.957491987	0.178932916	0.20164096	0.126768914	0.261181397	0.24048869	0.846509166	0.160012987	0.136452242	0.436104896	0.178155913	0.142293602	0.055177974	0.186317113	0.239176549	0.878588545	0.25441463	0.255033316	0.029402179	0.187760136	0.231418159	0.007117352	0.151955309	0.089559578	0.794268007	0.231699596	0.233682153	0.001938305	0.213803043	0.324369991	0.189403354	0.233563887	0.255119693	0.78148301	0.215341461	0.204473587	0.031136819	0.237821837	0.193700615	0.127394708	0.146493812	0.29544335
SLC35E2	-	Alu	no-conserve	0.359716978	0.066062873	0.054867175	4.52E-06	0.085263725	0.055326389	0.57824613	0.056368493	0.071306471	0.579921927	0.04687535	0.037988934	0.040732861	0.063233802	0.087667288	0.051482083	0.084366168	0.060270093	0.425284983	0.070575778	0.07388146	0.01491706	0.05739772	0.034687964	0.410585836	0.084449973	0.07684	0.152740003	0.068149336	0.097070635	0.203428001	0.076079757	0.068498182	0.185318836	0.094802374	0.070794397	0.000357834	0.082887933	0.051545509	0.905454265	0.062536169	0.051963602
SLC35E2	-	Alu	no-conserve	0.41606419	0.136225198	0.099355923	0.13366923	0.1803354	0.202013946	0.590141531	0.101529299	0.128571429	0.856832384	0.079164421	0.06001021	0.107954115	0.09657186	0.128002852	0.451118041	0.14801771	0.128668022	0.035941415	0.14237229	0.195940088	0.496477622	0.053682491	0.047878011	0.010404994	0.176967867	0.119161555	0.586899934	0.125271466	0.128089519	0.153171127	0.18348012	0.149321549	0.218914843	0.163184426	0.109416433	0.639081669	0.198006387	0.189307735	0.59652254	0.085671735	0.09620098
SLC35E2	-	Alu	no-conserve	0.131045921	0.084295926	0.036044694	0.00014008	0.087255697	0.11734432	0.449228188	0.066346788	0.083333333	0.12780974	0.035926757	0.056085695	0.151521403	0.073969444	0.102037434	0.432877938	0.089043446	0.068068981	0.21967581	0.106720878	0.134388812	0.417241666	0.019177681	0.011914141	0.020752728	0.094390387	0.062650642	1	0.071797953	0.056277479	0.242750008	0.107687192	0.084483889	0.930630069	0.096890948	0.092842659	0.32381943	0.115244744	0.126623534	0.738011624	0.047273111	0.019230769
SLC35E2	-	Alu	no-conserve	0.548807499	0.015104555	0.010934679	0.54181326	0.025708611	0.018257009	0.427565606	0.010644931	0.022222222	0.794425647	0.009541494	0.006286229	0.001881405	0.00843175	0.030153745	0.548031516	0.018815197	0.018228101	0.383819992	0.012833876	0.018073739	0.520056684	0.008334408	0.007171123	0.014949097	0.020062682	0.01059165	0.077510535	0.01321166	0.013620167	0.171099142	0.018904588	0.013654501	0.253624211	0.017428179	0.00898198	0.945901833	0.024661518	0.023009914	0.012622439	0.010161593	0.058333333
SLC35E2	-	Alu	no-conserve	0.052523988	0.043370155	0.012087912	0.744578247	0.053588441	0.046778525	0.691789096	0.03362612	0.060606061	0.517593233	0.015658225	0.011471718	0.07713784	0.020347422	0.038209393	0.832668288	0.039659739	0.034865125	0.279706461	0.046312488	0.06144627	0.246158673	0.014558085	0.00530303	1.46E-05	0.054905418	0.014644969	1	0.037807707	0.028844824	0.490197129	0.041533702	0.037810997	0.009769099	0.047674876	0.010242753	0.81842342	0.062495195	0.06041221	0.294124282	0.026211914	0.030539773
SLC35E2	-	Alu	no-conserve	0.977270734	0.082600515	0.07993489	0.050184481	0.10714698	0.120126633	0.181725661	0.060442525	0.146520147	0.349299241	0.038136406	0.053455804	0.014791565	0.065078559	0.111294933	0.434718049	0.103750863	0.090696858	0.100474369	0.112521607	0.144551462	0.005022995	0.041013121	0.00753748	0.020200433	0.108404806	0.070883867	0.078143223	0.087031398	0.132073265	0.438660042	0.123457153	0.15487634	0.295172279	0.058680518	0.042969276	0.055505036	0.128401841	0.089715751	0.195392589	0.031342261	0.065860215
SLC35E2	-	Alu	no-conserve	0.547773633	0.067564095	0.041892979	0.015844073	0.086516809	0.097631556	0.177878727	0.044442131	0.095238095	0.609194651	0.022935559	0.019196398	0.004008635	0.058526386	0.103379792	0.46235229	0.069026484	0.075386118	0.37624566	0.084777912	0.106253581	0.03330251	0.026340474	0.005438375	0.001755111	0.089523319	0.04853609	0.305787659	0.071382411	0.095489615	0.285516447	0.088334759	0.098698263	0.256179258	0.049851625	0.037506888	0.684254607	0.10191073	0.092435877	0.492931212	0.016779954	0.045454546
SLC35E2	-	Alu	no-conserve	0.205124342	0.109124572	0.065156367	0.234998829	0.124983179	0.127137248	0.11789435	0.074852868	0.222222222	0.500611947	0.039912348	0.03118413	0.045908847	0.104904723	0.144727088	0.120130008	0.105099007	0.081915236	0.651481332	0.115042765	0.115096345	0.040967071	0.033025181	0.014640646	0.000989087	0.12581394	0.06593514	0.484951792	0.111916062	0.079313887	0.674730064	0.129784717	0.133146153	0.152895624	0.069996004	0.038631953	0.242814696	0.159072236	0.136425462	0.276216753	0.024870029	0.019202899
SLC35E2	-	Alu	no-conserve	0.028230549	0.083737679	0.037305468	0.001163083	0.14139752	0.109709436	0.281241408	0.071025886	0.014492754	0.185116192	0.063927566	0.038084749	0.00083002	0.056825941	0.109611427	0.225918131	0.112028006	0.098145362	0.000247092	0.056941141	0.110721206	0.035053307	0.077195448	0.050723388	3.27E-06	0.122637007	0.062762364	0.013526992	0.087049111	0.126316399	0.818102139	0.093234047	0.09568612	0.160090486	0.069095415	0.040832804	0.613468119	0.110995772	0.10552959	0.209949532	0.031688732	0.063461539
SLC35E2	-	Alu	no-conserve	0.780662261	0.24510368	0.2382616	0.847567304	0.30404068	0.305033637	0.057120548	0.209207347	0.44236156	0.188399	0.122728189	0.077706205	0.044152106	0.262093971	0.373931793	0.101044119	0.280812707	0.239498879	0.932197543	0.300529822	0.295645349	0.004558076	0.107183392	0.025287713	0.000766865	0.304085553	0.20695958	0.63733046	0.226266097	0.238412214	0.579148589	0.310323539	0.294474038	0.005293658	0.156982063	0.050530834	0.010100599	0.346690995	0.279337138	0.289825929	0.06362497	0.102631579
SLC35E2	-	Alu	no-conserve	0.206385272	0.365704179	0.254986445	0.863539137	0.462573074	0.465595361	0.279638982	0.313763554	0.507936508	0.247021365	0.17631471	0.124877747	0.122819546	0.355833199	0.483183794	0.008392341	0.426368656	0.329589134	0.63080553	0.424165658	0.462989864	0.001231494	0.158421107	0.035518795	1.06E-05	0.450941809	0.265910976	0.712507849	0.336253702	0.340015157	0.736957647	0.456551709	0.433514905	0.009002343	0.243581222	0.100045536	0.001277467	0.509954151	0.399153486	0.474304681	0.09132871	0.108134921
SLC35E2	-	Alu	no-conserve	0.472864451	0.262644737	0.301817342	0.9725264	0.285323262	0.286393243	0.623418197	0.206843804	0.108225108	0.615780454	0.217987715	0.175283419	0.786186781	0.245087227	0.250908519	0.047202151	0.31691702	0.270013946	0.828204437	0.222209507	0.239664829	6.12E-07	0.232167732	0.080548644	0.018726059	0.293191733	0.233032159	0.050630276	0.275730226	0.394177873	0.324446501	0.27998739	0.316592402	0.361995607	0.246783476	0.296141934	0.942015109	0.299926398	0.297328032	0.071029739	0.144854502	0.333094966
SLC35E2	-	Alu	no-conserve	0.003319278	0.603829256	0.469929079	3.72E-11	0.772658359	0.711010555	0.883218368	0.601795929	0.53968254	0.263830698	0.613379595	0.638079108	0.203474852	0.6923814	0.745991448	0.003275929	0.706866923	0.772434135	0.011603521	0.638279707	0.750604585	3.18E-06	0.46087712	0.151237762	0.022632877	0.680605659	0.608382894	0.633015223	0.661728756	0.693766683	0.601004129	0.705965061	0.755788991	0.075030524	0.567135835	0.447297892	0.013986464	0.721365356	0.673134899	0.017909213	0.17263389	0.559456041
NBPF1	-	Non-Alu-repetitive	no-conserve	0.206669309	0.682461055	0.724898641	4.41E-10	0.746210466	0.683054489	0.023336279	0.628693207	0.802297896	0.000246191	0.635037097	0.557522949	3.04E-05	0.572153851	0.730383661	0.027858416	0.728976354	0.706523556	0.002584129	0.648356631	0.712241119	0.747050642	0.730013404	0.710311451	0.347292481	0.705314709	0.722039241	0.001630349	0.629265861	0.730142867	0.011908535	0.703769346	0.737974667	0.041315922	0.577739549	0.396487742	1.17E-13	0.746264238	0.63873985	0.881000417	0.488576403	0.53462932
NBPF1	-	Non-Alu-repetitive	no-conserve	0.95642458	0.208777471	0.203007961	9.44E-06	0.264200474	0.220285	0.708578965	0.197235911	0.210616415	0.10418019	0.211854945	0.184011666	0.000464953	0.169480095	0.249515804	0.008512001	0.214824635	0.184605911	0.024735854	0.186789569	0.21574089	0.179749309	0.247903962	0.263639717	0.149020041	0.240861847	0.220790648	0.095867667	0.190552221	0.2251183	0.684066939	0.218138328	0.22043474	0.000348855	0.163450066	0.091014156	1.02E-11	0.256268893	0.182500456	0.073805537	0.163983467	0.254945286
NBPF1	-	Non-Alu-repetitive	no-conserve	0.8602442	0.245750516	0.235432956	0.001523761	0.245873436	0.201721006	0.223508393	0.196546566	0.281137993	0.002096074	0.216171784	0.147705941	2.07E-08	0.078523496	0.219251284	0.033121308	0.193997373	0.165173066	0.000782414	0.097638974	0.165432331	0.934645707	0.19991261	0.202476208	0.191823962	0.209533608	0.225799526	0.001193662	0.17361992	0.264935636	0.000731944	0.180664142	0.224827451	0.470927023	0.171939675	0.148218589	0.000865322	0.286555924	0.228919787	0.038853321	0.063366386	0.150694445
NBPF1	-	no-repetitive	no-conserve	0.02796868	0.308051543	0.401183421	2.57E-19	0.408440445	0.29910852	0.062358032	0.303151205	0.428841874	2.47E-07	0.326182975	0.225256288	1.96E-06	0.202579231	0.301508269	0.000544278	0.353750034	0.317162514	0.000516335	0.238782698	0.290493157	0.224920506	0.405283375	0.4326964	0.812106903	0.364598121	0.355812597	0.001446382	0.307547383	0.390834201	0.159765659	0.302699309	0.313422257	0.021730891	0.256610467	0.172538704	6.84E-13	0.333407171	0.24142535	0.017176529	0.130954029	0.327075099
NBPF1	-	no-repetitive	no-conserve	0.001939785	0.617818932	0.524462887	1.16E-18	0.636667069	0.541683247	0.971796107	0.592427072	0.605734715	1.37E-12	0.59610179	0.435579939	1.01E-06	0.525672027	0.667603694	0.370217226	0.65614055	0.645923473	0.042796847	0.580673756	0.621920526	0.642180703	0.703596945	0.708558305	1.25E-06	0.624436603	0.550912191	0.633128937	0.597943818	0.588109197	0.166657693	0.619336564	0.602507077	0.231845844	0.336276584	0.273477896	3.36E-18	0.664597247	0.541994584	0.34709309	0.053547753	0.153846154
NBPF1	-	no-repetitive	no-conserve	0.033709655	0.08275331	0.058245011	5.24E-10	0.104636942	0.076364845	0.187394756	0.090644387	0.058555403	0.009820275	0.101720907	0.076839852	0.060153469	0.073710882	0.095255414	0.007432566	0.116463577	0.099377005	0.001315051	0.078203158	0.103702286	0.005768779	0.150334327	0.182622205	5.75E-05	0.104699376	0.073024584	0.929777897	0.09997488	0.092085813	0.969794031	0.085480319	0.085310869	0.162955471	0.052818263	0.036196936	3.39E-05	0.105389179	0.080462606	0.562929886	0.009532321	0
NBPF1	-	no-repetitive	no-conserve	0.233983374	0.042734353	0.02801083	2.05E-09	0.064225668	0.032368769	0.767158956	0.038889237	0.027949363	0.662105304	0.034347605	0.031765155	0.000634128	0.024583085	0.046386373	0.030004783	0.041352443	0.031626581	0.097771538	0.028047903	0.034682942	0.197806408	0.070634971	0.062310064	0.184722612	0.056301274	0.041644274	0.422205763	0.040977493	0.040383528	0.745689341	0.035655785	0.036656856	0.646372365	0.036984442	0.030350663	0.00016881	0.046192026	0.028886364	0.579546676	0.020580498	0.015207374
CENPL	-	Alu	chimp	2.89E-06	0.052205164	0.009569378	7.94E-06	0.06744367	0.049862095	0.292692209	0.050847728	0.027777778	1.08E-08	0.05576643	0.014259472	0.012826861	0.05199039	0.018513557	0.000110384	0.063234832	0.035056829	0.019219544	0.029328352	0.006363636	8.57E-07	0.03581133	0.005176471	1.24E-13	0.046759701	0.00132626	0.001367181	0.061528585	0.029284441	0.733714615	0.028613881	0.030572072	2.12E-07	0.069092745	0.020141475	0.95143915	0.042296241	0.038546876	0.145987218	0.034957517	0
GAS5	-	Alu	no-conserve	2.52E-08	0.009477461	0.033937077	3.21E-14	0.017632118	0.024384709	0.004460944	0.011317705	0.031427728	2.39E-05	0.009432866	0.01340868	1.91E-08	0.011885645	0.026349145	4.75E-06	0.019429577	0.025639609	6.56E-07	0.013189954	0.022095909	0.003203476	0.016987846	0.023927356	4.56E-24	0.015416672	0.0382449	1.42E-11	0.011181331	0.047764332	3.40E-17	0.011777117	0.02182566	0.013550119	0.010476487	0.020621065	0.207292775	0.017924967	0.01911093	0.002240404	0.010015055	0.022920575
ABL2	-	Alu	chimp	0.097214064	0.037301182	0.017534739	0.034769586	0.058101862	0.050344182	0.375453924	0.036332115	0.056980057	4.26E-05	0.050401007	0.02868374	0.241473866	0.050358079	0.060401029	0.828179109	0.044293044	0.048925334	0.076083784	0.03490023	0.049657139	0.00035612	0.030509642	0.008871795	0.725853106	0.036731299	0.037727385	0.785831983	0.039031024	0.032997569	0.169471352	0.066691895	0.080036768	0.005234893	0.0486148	0.032511827	0.084329529	0.040262776	0.052366297	0.507091457	0.010683859	0
TOR1AIP2	-	Alu	no-conserve	0.015287805	0.026976629	0.007027183	6.01E-05	0.018627879	0.008001976	0.161872148	0.027148053	0	0.000815167	0.029055812	0.016054373	0.003567182	0.007179114	0.017297361	0.037551875	0.013130983	0.015089759	0.000448052	0.013631896	0.023497285	0.897305464	0.031104094	0.03151418	0.000397392	0.018584148	0.006405827	0.022903065	0.024666699	0.006739252	0.000542379	0.012058471	0.025756851	0.025842063	0.015362854	0.009348132	0.385077658	0.011346041	0.010155582	0.672067922	0.011484756	0.019230769
TOR1AIP2	-	Alu	no-conserve	0.178189801	0.088718347	0.060320937	1.17E-06	0.054617786	0.034132737	0.787277408	0.088216651	0.087440382	3.87E-05	0.081704054	0.047210102	0.001155893	0.045604129	0.079772737	0.353249767	0.047484538	0.04469478	0.814128912	0.045548506	0.038262335	0.027742414	0.080385328	0.051327611	8.42E-08	0.060754697	0.025286377	0.000341725	0.07762885	0.03105828	8.27E-06	0.043859468	0.075864748	0.005175256	0.052207535	0.031429003	0.30127844	0.046076437	0.036308057	0.216536502	0.032786967	0.043117669
FAM129A	-	Alu	no-conserve	0.032578981	0.028732877	0.038127881	0.200641057	0.028717133	0.023325382	0.979648033	0.031232243	0.026842949	0.000655896	0.035304298	0.022248366	0.041881401	0.016834664	0.054668712	0.53934199	0.032270084	0.040343056	0.197912864	0.019086577	0.030564241	0.011300734	0.011184093	0.001538462	0.290881868	0.031966934	0.033384488	0.187716622	0.030417753	0.037545817	0.065492659	0.024311724	0.027095526	0.495749064	0.02357271	0.024049709	0.221525937	0.029369238	0.024029032	0.032409714	0.006617136	0.012739848
FAM129A	-	Alu	no-conserve	0.016583649	0.026420796	0.041551052	0.005948983	0.025831679	0.018734233	0.38148184	0.023297057	0.028831533	0.003251782	0.022698915	0.013386335	0.011796947	0.016148531	0.034038092	0.881881809	0.031322642	0.033040977	0.45556424	0.020208886	0.030304554	0.000512223	0.015249536	0	0.413723292	0.026337942	0.026310776	0.191068449	0.027553235	0.034392289	9.27E-07	0.023253462	0.034494896	0.81388288	0.023062249	0.021712224	0.056371406	0.027121162	0.023724002	0.001446942	0.008963793	0.022712704
FAM129A	-	Alu	chimp	1.58E-05	0.028128098	0.116696065	3.34E-11	0.01390182	0.027699454	0.009673372	0.007276834	0.092016994	0.922050861	0.007704272	0.007153756	0.046794577	0.019610493	0.054683463	0.000354206	0.036228133	0.073992441	0.000233593	0.011865811	0.067175055	0.021432129	0.010990899	0.001428571	1.99E-14	0.015587833	0.064829285	1.76E-07	0.009337209	0.046480387	0.001993712	0.01767933	0.030184175	9.93E-06	0.021830048	0.076477843	0.002945214	0.017559016	0.040719505	0.005170946	0.005414956	0.023567091
FAM129A	-	Alu	no-conserve	0.00017121	0.021453618	0.060913487	0.000134412	0.017506068	0.021133755	0.062625325	0.013184497	0.040466023	0.240802445	0.012868297	0.009356807	0.053120805	0.01780201	0.037868152	0.919710132	0.031102101	0.034797495	1.51E-05	0.013867761	0.046724343	0.033304278	0.009562866	0.003428571	2.00E-08	0.015643762	0.030368684	3.25E-05	0.013242226	0.036427096	6.16E-11	0.019167294	0.035340343	0.071384863	0.023238356	0.037394811	0.701888571	0.019635986	0.029129973	0.024716863	0.006054022	0.016369313
FAM129A	-	Alu	chimp	0.007436848	0.049405492	0.075355379	9.06E-07	0.068901673	0.040745401	0.088516539	0.051518687	0.097441002	0.002525802	0.043563517	0.028048949	0.224445492	0.027469049	0.050280107	0.969418776	0.062653114	0.069736192	0.025408104	0.032235872	0.055142181	0.000584575	0.021092431	0.00137931	0.382203827	0.059921013	0.062597349	0.006259238	0.045767376	0.070220755	1.94E-14	0.040954092	0.075708664	0.765803083	0.059822222	0.058238818	0.679543404	0.054922328	0.058449266	0.234092164	0.018142121	0.022383804
FAM129A	-	Alu	chimp	8.91E-05	0.039846313	0.086940654	0.00027536	0.055935867	0.036953851	0.060995125	0.037765337	0.075081019	0.255283815	0.0358917	0.029504403	0.000696064	0.014345553	0.059617144	0.682881544	0.052078521	0.056864124	0.034410242	0.029698421	0.058094975	0.003179096	0.01514746	0.002142857	0.01290221	0.049243262	0.061356851	0.058110248	0.038763282	0.057886194	6.28E-08	0.033298414	0.049549217	0.502540187	0.047743808	0.05037312	0.433149511	0.044178265	0.048993374	0.003994818	0.013471151	0.034146943
FAM129A	-	Alu	no-conserve	1.02E-07	0.032970668	0.171853023	1.50E-24	0.011891003	0.031424667	0.000635764	0.006406098	0.077885673	0.052520813	0.005192107	0.008498486	0.00054881	0.013454495	0.093518369	0.004213322	0.043399139	0.076205548	3.43E-09	0.012949734	0.092339825	0.01447874	0.011555456	0	5.49E-21	0.014333226	0.06436384	1.48E-09	0.011915447	0.076312689	4.84E-06	0.020484177	0.039011769	7.30E-05	0.028340415	0.089690134	1.82E-06	0.015377863	0.051481875	1.36E-05	0.002763744	0.037032851
FAM129A	-	Alu	no-conserve	0.003408277	0.030675028	0.05192326	2.45E-06	0.044881319	0.02584042	0.34896832	0.024965004	0.032275175	0.1965058	0.0233714	0.019052731	0.005812116	0.013807812	0.047113429	0.208694157	0.041708658	0.053209995	0.406120668	0.01893378	0.026552521	0.003859138	0.015661371	0.0032	0.878503005	0.036065313	0.037534619	0.001780013	0.028183891	0.046095441	1.31E-07	0.023153631	0.036289038	0.024460685	0.036838173	0.056885179	0.081076907	0.035178925	0.028609323	0.001683793	0.01024911	0.044472606
FAM129A	-	Alu	both	0.084076654	0.183716634	0.235723544	5.22E-15	0.300177899	0.211019643	0.738643889	0.224450337	0.252863689	1.14E-06	0.284150906	0.189569443	0.970339944	0.120285981	0.137793687	0.405207932	0.304321177	0.26732383	0.168632506	0.193991023	0.227981475	0.001168368	0.06667662	0.006315789	0.027683729	0.271848336	0.242791512	0.104988541	0.225710022	0.262360805	1.33E-14	0.203165185	0.311284616	0.979209072	0.379394807	0.368470981	0.009699028	0.281762586	0.230775197	0.254037036	0.09984222	0.22790599
FAM129A	-	Alu	no-conserve	0.656682917	0.023566998	0.011963418	0.000302263	0.04457802	0.02999014	0.392709427	0.03267493	0.014520425	0.042078899	0.027832268	0.01881002	0.347901442	0.016390791	0.008998108	0.000547463	0.02642067	0.016755636	0.00111726	0.024843634	0.009447909	0.078148405	0.007691467	0.001052632	0.01481378	0.035735471	0.023268058	0.179904132	0.03429258	0.036992737	0.001499085	0.026017156	0.034520694	0.211947081	0.026970963	0.018928947	0.001509308	0.030929302	0.018145935	0.122374081	0.011434657	0.015763076
FAM129A	-	Alu	chimp	0.548122645	0.052387673	0.042633019	1.82E-09	0.072291081	0.041984302	0.342100917	0.06010662	0.080605477	1.24E-05	0.059361324	0.028859638	0.48229441	0.02366126	0.039233211	0.027643168	0.068579124	0.058116566	0.516314761	0.038629178	0.052403689	0.004386465	0.015692217	0	0.029284876	0.070572967	0.050124235	0.609260562	0.059886131	0.050424556	3.10E-05	0.04163655	0.057674644	0.032964089	0.070303983	0.043002069	0.26215678	0.057050552	0.052782078	0.086174884	0.015730583	0.022036054
FAM129A	-	Alu	no-conserve	0.00320888	0.034075631	0.056724551	0.011068714	0.054848525	0.042322584	0.58260353	0.034394243	0.042822344	0.271329388	0.035479233	0.026707039	0.212832466	0.029614922	0.038382557	0.894920004	0.056366299	0.058422056	0.005936333	0.027164196	0.0448576	0.085487003	0.009489252	0.002352941	0.01744992	0.046587204	0.057342403	0.003706627	0.041043486	0.060397069	3.01E-05	0.038109246	0.049094618	0.917400137	0.065993712	0.062183115	0.613116063	0.041222516	0.05432156	0.008588838	0.007431928	0.029623288
FAM129A	-	Alu	no-conserve	0.905096743	0.074717954	0.065324824	4.37E-20	0.124624074	0.064390265	0.9756525	0.090790445	0.088773946	0.000248462	0.093918303	0.056647844	0.009497751	0.040894784	0.108281422	0.016152105	0.119785705	0.107536921	0.012352947	0.067580105	0.097175757	0.132919714	0.022637652	0.009686275	0.962754064	0.102221333	0.098887355	0.013387134	0.104954195	0.140632185	1.27E-09	0.069263337	0.100277318	0.029361989	0.135662574	0.101636841	0.705391326	0.093934742	0.092298184	0.099785858	0.019673419	0.03127701
FAM129A	-	Alu	no-conserve	2.78E-06	0.024791032	0.085644741	0.528053215	0.032428965	0.025722216	0.741604284	0.020236547	0.015658232	0.102945132	0.018427752	0.01157695	0.047119795	0.014383869	0.03263881	0.012247798	0.038965979	0.058914942	0.000379698	0.015249307	0.044705609	0.012232023	0.009933852	0	3.85E-07	0.028969598	0.049399445	0.000211721	0.022615248	0.045986614	3.13E-07	0.020006407	0.034060499	0.004959432	0.036447035	0.058417895	0.139879097	0.022574459	0.034565564	0.001063375	0.004194597	0.014170497
FAM129A	-	Alu	no-conserve	1.08E-06	0.034372564	0.147438136	0.202768592	0.030810558	0.031234665	0.421101485	0.017962226	0.02537511	0.216670364	0.01712229	0.012910919	0.00998769	0.021155718	0.050803191	0.070530555	0.048867886	0.068951295	0.000584718	0.021893633	0.058212296	0.073693249	0.008509065	0.0025	5.19E-12	0.028907037	0.073195689	9.19E-09	0.019173922	0.081605292	3.30E-05	0.022538703	0.033087086	0.021378303	0.037560133	0.071923566	0.335408656	0.025333527	0.038585032	1.81E-08	0.002993825	0.054122575
FAM129A	-	Alu	chimp	0.012616111	0.090565803	0.133770534	5.29E-14	0.168505503	0.102303544	0.846512747	0.109156791	0.107406131	0.000119268	0.110710935	0.067682275	0.001300038	0.056184207	0.131617642	0.160436365	0.14740036	0.139526786	0.037264093	0.078118225	0.126133798	0.016655393	0.030183836	0.009	0.60042512	0.143104222	0.147512495	0.069961774	0.139614309	0.163573324	2.60E-08	0.093538098	0.134206625	0.180047526	0.170583392	0.14169455	0.840410568	0.120317404	0.118593503	0.002863786	0.028832021	0.09788267
FAM129A	-	Alu	no-conserve	6.60E-07	0.028996661	0.127299042	0.291340829	0.026378986	0.025616599	0.005113323	0.019488972	0.099990589	0.560056448	0.0155921	0.010369738	0.000544038	0.01258871	0.056125765	0.01216971	0.040390352	0.060923891	0.002106418	0.013287264	0.04786717	0.428270736	0.003215525	0.00125	0.000109598	0.024153651	0.040937482	1.83E-05	0.017817988	0.053997426	2.07E-06	0.018104932	0.032522432	0.063066574	0.057744812	0.102623042	0.727032701	0.021692255	0.029808761	0.001474744	0.004691273	0.024865229
FAM129A	-	Alu	no-conserve	0.001646605	0.021144983	0.043675768	0.079639335	0.03433774	0.033702615	0.325221388	0.024327544	0.043281654	0.227978505	0.023918444	0.017348745	0.045994936	0.011716882	0.031192805	0.962197183	0.039642304	0.038959626	1.92E-05	0.016869456	0.062347489	0.066996183	0.009954571	0.00125	0.000617859	0.027598129	0.046734028	0.000771706	0.028199592	0.053682854	4.39E-05	0.025575613	0.03786543	0.244969719	0.048839763	0.054599444	0.394745112	0.029346562	0.041572827	1.28E-07	0.00422627	0.037779979
FAM129A	-	Alu	chimp	0.007914288	0.216836465	0.335358281	4.38E-08	0.339323449	0.276990671	0.263845828	0.206330726	0.306552707	0.000299646	0.23011535	0.160850653	0.001153485	0.153760976	0.313121336	0.752229246	0.345249623	0.342172845	5.64E-05	0.189558726	0.338014238	0.003469122	0.070952381	0.005	0.141999791	0.288363786	0.33517496	0.010096686	0.277124926	0.366078507	6.97E-13	0.25773362	0.375169997	0.659038205	0.359767676	0.36255495	0.912369256	0.277735293	0.27830801	0.000152837	0.039784343	0.370636632
FAM129A	-	Alu	no-conserve	2.87E-08	0.055420567	0.250247668	0.077904188	0.055448378	0.059847436	0.116984462	0.025120673	0.126923077	0.999027664	0.028633925	0.024980452	0.000116277	0.046859761	0.146405258	0.005367395	0.078294569	0.110854593	1.19E-09	0.033089087	0.145199466	0.002178864	0.017776537	0	5.97E-13	0.048574749	0.120016765	5.76E-08	0.038795873	0.119644137	7.56E-06	0.05544816	0.079393737	0.000283927	0.058414989	0.120321021	0.03145002	0.048688228	0.07395168	0.00064291	0.006125473	0.060861827
FAM129A	-	Alu	no-conserve	0.14468997	0.096787103	0.120944602	9.18E-12	0.183279732	0.10442006	0.873573673	0.099781777	0.141696293	0.009333119	0.107987531	0.068424333	0.007028009	0.055972194	0.121295236	0.615848616	0.149935381	0.154602057	0.002254612	0.069993372	0.121360226	0.0308891	0.022996539	0.003636364	0.802569336	0.143511938	0.131486054	0.047497487	0.134916378	0.165143922	5.05E-11	0.099944723	0.155979914	0.186364989	0.13278282	0.112630098	0.439722345	0.127457773	0.140768983	0.008473922	0.018043478	0.067406371
FAM129A	-	Alu	chimp	0.486325881	0.102433408	0.103677285	1.38E-16	0.202615024	0.115619714	0.509398373	0.113756478	0.147661228	0.000761563	0.119712601	0.073149321	0.001251388	0.061557219	0.154579349	0.204388688	0.164492948	0.151152072	0.000963236	0.07695157	0.134854387	0.001278488	0.043477165	0.00125	0.923513187	0.164145523	0.158170294	0.360532738	0.148388732	0.157386143	2.91E-10	0.121774955	0.180668425	0.033569593	0.160978863	0.130140715	0.748545598	0.132629343	0.13447811	0.013572132	0.019141021	0.079797821
FAM129A	-	Alu	chimp	0.000600558	0.073900037	0.137689777	0.771556385	0.081243883	0.078554682	0.421663639	0.048342858	0.068703212	0.013022786	0.067400502	0.04810141	6.14E-05	0.051223762	0.128782218	0.380490674	0.092750873	0.10864243	1.10E-05	0.044951015	0.131889304	0.034415655	0.013516365	0.005454545	0.000866798	0.068105304	0.091972898	0.639572096	0.076506884	0.079272103	8.63E-14	0.084313949	0.134722931	0.005592732	0.125645477	0.172610753	0.84485345	0.082333891	0.085487125	0.068599886	0.023729898	0.088966325
FAM129A	-	Alu	no-conserve	0.000104114	0.02598654	0.051689315	0.001265935	0.044164703	0.028460995	0.881573753	0.031282121	0.020976093	0.215871876	0.033796075	0.024001457	0.02600675	0.023525669	0.047480945	0.721169047	0.039981093	0.043376317	0.659246408	0.025971673	0.03400704	0.023942037	0.010508895	0	0.134298035	0.041046552	0.046410527	0.195996061	0.037072212	0.040284901	1.32E-06	0.033000758	0.049539531	0.722927233	0.04623231	0.052133369	0.678317156	0.036716532	0.036849047	0.008068025	0.007181601	0.029449153
RAB7L1	-	Alu	both	0.322530561	0.01464602	0.008440172	0.534611581	0.021189212	0.018614644	0.915442192	0.015324048	0.034482759	0.022652885	0.012291691	0.010528562	0.00204247	0.012788632	0.011730596	0.095972094	0.018594168	0.01284208	0.264702672	0.013313918	0.013025726	0.103419124	0.017496302	0.013937747	0.185119516	0.016345524	0.022140795	0.104192599	0.016798178	0.023928429	0.675706809	0.015536182	0.013149374	0.780944847	0.022684759	0.030504453	0.380643272	0.012626549	0.009693576	0.519917078	0.008813755	0.019230769
DDOST	-	Alu	no-conserve	0.639932166	0.001468099	0.004049384	0.024075486	0.003307234	0.003046401	0.268084874	0.00165143	0.002865583	0.043628942	0.002428071	0.00139382	0.008906011	0.001907371	0.003780818	0.105618343	0.003488326	0.004345288	0.00035908	0.001979131	0.004560875	0.020149697	0.001016373	0.003653719	5.82E-09	0.002372173	0.009348382	0.0026818	0.002691679	0.008368327	0.335711524	0.002119568	0.002662362	0.155817578	0.00679951	0.014277284	0.576582832	0.002551106	0.003092853	0.253948099	0.002115145	0
DDOST	-	Alu	chimp	0.007833482	0.010994601	0.019740479	0.681539906	0.015421591	0.016273329	0.029482009	0.011390489	0.024453583	0.020388875	0.012635703	0.009917764	7.08E-06	0.00673892	0.014304715	0.519326918	0.013554766	0.014380393	0.098933619	0.010866221	0.014060549	0.93016219	0.010458744	0.010951157	0.000159566	0.013427257	0.020246923	0.004103914	0.012173453	0.01881855	0.016575327	0.011561386	0.015291245	0.682520683	0.029922302	0.037924903	0.810008377	0.012168567	0.011264713	0.002155878	0.019357356	0.072028209
DDOST	-	Alu	no-conserve	0.01224322	0.002658204	0.0014437	2.13E-06	0.003730109	0.00283656	0.229702527	0.002814074	0.000986193	0.009621957	0.002969962	0.001717871	0.31990992	0.002075558	0.002657965	0.462008253	0.002760585	0.002637848	0.408448128	0.002532171	0.003151951	0.651329435	0.002449169	0.003125733	0.723049032	0.003025096	0.003650924	0.018441617	0.002809956	0.001162672	0.304561286	0.00261465	0.002345323	0.430969083	0.005107971	0.004511909	0.9460557	0.002721599	0.002709786	0.04110542	0.004192401	0
DDOST	-	Alu	no-conserve	0.340404233	0.005606677	0.007337933	0.245630287	0.007248161	0.007818228	0.124624832	0.00489293	0.012941925	0.549312583	0.005481964	0.005966373	0.099083874	0.004296562	0.005896852	0.609640056	0.006565638	0.006630015	0.747027158	0.005042729	0.005627404	0.00063666	0.004576805	0.003279015	1.89E-07	0.0056552	0.008897452	0.236847197	0.006530733	0.005815875	0.000182628	0.006096705	0.00832823	0.166824372	0.010516689	0.013367471	0.17711619	0.007024651	0.006350932	0.254349071	0.010842726	0.02270378
DDOST	-	Alu	no-conserve	0.542986882	0.001168652	0.001817765	0.357223757	0.001770259	0.002388286	0.005587282	0.001527876	0.005250254	0.142808973	0.001593375	0.001140943	0.000346298	0.001036954	0.003290277	0.072965128	0.001989711	0.001796789	0.599934583	0.001451103	0.001795739	0.024726646	0.001418541	0.001357114	0.793638199	0.001605532	0.002182764	0.608158446	0.00157591	0.001533701	0.766606188	0.001784118	0.001891957	0.475590682	0.002576476	0.003681076	0.030614482	0.001982225	0.001202438	0.048017308	0.002803345	0
DDOST	-	Alu	no-conserve	4.12E-05	0.003575722	0.023375089	2.77E-15	0.005216936	0.010234394	0.002911717	0.002801195	0.026895128	0.476222896	0.003651097	0.004483471	9.76E-05	0.002950449	0.006973803	0.370594339	0.007156573	0.006348789	0.011577938	0.004785023	0.007038622	0.967374288	0.002938639	0.003948487	1.02E-15	0.004227487	0.013483681	2.03E-08	0.004122641	0.013019884	2.47E-05	0.006600705	0.010730035	0.955220895	0.00670149	0.016173209	0.896393171	0.004219043	0.00389256	0.000780152	0.00443885	0.032521966
DDOST	-	Alu	no-conserve	0.377058547	0.014729676	0.012850462	0.298445613	0.020227926	0.019456503	0.871601394	0.016298363	0.01677979	0.004987414	0.022625826	0.018673894	1.40E-05	0.013408703	0.019966204	0.001116311	0.01643286	0.019166381	0.000195636	0.012191953	0.017483983	0.46387002	0.017276878	0.01795126	0.164221494	0.016848369	0.016133258	0.413954897	0.017791031	0.016486409	1.23E-06	0.013913859	0.019135603	0.281942267	0.037109769	0.03329168	0.017592539	0.018249397	0.020326488	0.058419197	0.03289742	0.047270985
DDOST	-	Alu	no-conserve	6.26E-06	0.005733745	0.0023454	5.34E-12	0.006359968	0.003331115	0.564704211	0.005336012	0.006401225	1.42E-07	0.010609051	0.005439369	0.38181938	0.003066741	0.003720738	0.034681585	0.005612775	0.004530753	0.000408179	0.003483889	0.006078886	0.168244632	0.008534195	0.007743474	0.003071457	0.006229309	0.004192772	0.154143176	0.00622277	0.004698408	0.737123467	0.003620986	0.003651087	0.005919497	0.016125973	0.011557263	0.345026827	0.003597453	0.003922378	0.605242236	0.01027333	0.007983193
INTS7	-	Alu	chimp	0.068268788	0.025756839	0.01874209	0.033892103	0.024331043	0.028053827	0.375552236	0.026092341	0.018518519	0.835852802	0.023872138	0.025964318	0.735970471	0.023951847	0.021175565	0.093418461	0.026598282	0.020809979	0.949983524	0.026848821	0.025522487	0.013213871	0.028116275	0.022393411	0.009717179	0.025134774	0.01879588	0.071076966	0.031270924	0.019504077	0.538151527	0.024833281	0.025672399	0.000259419	0.031395868	0.017588162	0.204026241	0.026500714	0.022313645	0.623955109	0.057858565	0.044089017
INTS7	-	Alu	no-conserve	0.156081126	0.020162128	0.025623578	0.061148808	0.018291782	0.027683336	0.450931254	0.020909155	0.01754386	0.140168545	0.019753756	0.014933182	0.300585992	0.029527545	0.019383291	0.022282453	0.023935624	0.015359787	0.318415292	0.021131122	0.019666624	0.011945417	0.021165047	0.0141215	0.595111	0.019823265	0.026015822	0.486692773	0.021520692	0.020521078	0.795597101	0.018315393	0.017177477	0.001941331	0.023712543	0.012005955	0.852512238	0.019798839	0.022067991	0.767643441	0.024173121	0.022727273
ECE1	-	Alu	chimp	0.706634203	0.00458509	0.003986708	0.215576938	0.00515407	0.004103271	0.024019284	0.00420548	0.009312496	0.246875228	0.004095701	0.004199619	0.073461879	0.004404573	0.006467153	0.049483371	0.00540435	0.003938405	0.000480206	0.003189474	0.005910294	0.829899477	0.003885653	0.004705879	0.686033494	0.003959052	0.004428953	0.375714273	0.004059857	0.004324995	0.01539703	0.004873817	0.003088942	0.911386908	0.005197202	0.007011305	0.323560803	0.004157429	0.004525799	0.200895285	0.005324905	0.010483526
BPNT1	-	Alu	chimp	0.09865509	0.088430976	0.057723341	2.32E-21	0.129065929	0.060966568	0.585416945	0.1100808	0.092109929	7.59E-11	0.113604978	0.04684542	8.21E-09	0.036241549	0.092804401	0.158113665	0.124307403	0.110545523	1.59E-10	0.057842722	0.115971119	0.546184134	0.195795172	0.192323003	0.001979651	0.130239702	0.093149826	0.368343938	0.094762586	0.106329936	0.887668295	0.059139708	0.057512403	0.409333278	0.118460474	0.102138015	0.324552758	0.070132978	0.063162479	0.928469539	0.067751525	0.059869271
BPNT1	-	Alu	no-conserve	0.704336182	0.056311474	0.050405353	7.48E-06	0.066421952	0.055931859	0.298113044	0.054567438	0.032814798	0.002420769	0.048326965	0.033958026	0.444226833	0.059249147	0.060528767	0.153104115	0.061707691	0.055847387	4.35E-06	0.048496168	0.075926464	0.870596469	0.070437312	0.072143805	0.800857645	0.066927924	0.069771668	0.070551301	0.053087629	0.068757583	0.397702401	0.060709674	0.064679407	0.506508157	0.051941154	0.045583567	0.004987112	0.068775324	0.057022706	0.922002502	0.058170689	0.060277087
BPNT1	-	Alu	no-conserve	0.290111253	0.534996582	0.511076866	9.05E-27	0.666797914	0.51683528	0.758008617	0.573265604	0.549133122	2.91E-12	0.583727238	0.400397094	0.00150221	0.437383823	0.525964068	0.000377003	0.641342254	0.597683073	1.29E-08	0.443521321	0.561778439	0.059604896	0.700606514	0.75173135	0.303188692	0.607774061	0.589593879	0.224234593	0.57806847	0.618177176	0.018737158	0.507399283	0.536435602	0.450255167	0.626101571	0.591920802	7.83E-08	0.54742635	0.478626535	0.83840032	0.552361764	0.573623319
BPNT1	-	Alu	both	0.001553364	0.524610914	0.401504005	1.67E-31	0.586118366	0.402589955	0.167932805	0.586861738	0.474035645	3.96E-15	0.593926111	0.368929752	8.45E-08	0.391165563	0.536184679	0.877231573	0.589134486	0.592224646	1.85E-08	0.428174592	0.560659451	0.009179842	0.718592102	0.7809362	0.013646378	0.58704656	0.543059029	0.834223823	0.553995098	0.560630574	0.796982738	0.468204685	0.470434059	0.000392542	0.609291655	0.53517258	0.000466018	0.483149485	0.435468683	0.416196818	0.523644854	0.469165619
BPNT1	-	Alu	both	0.047969562	0.203831129	0.15679035	4.27E-29	0.256350556	0.147607849	0.054946	0.239034633	0.125479826	2.68E-09	0.232243602	0.140785886	0.068333239	0.164072071	0.194225751	0.666881301	0.232895754	0.237342287	4.11E-08	0.149573596	0.2271965	0.147450329	0.365445159	0.390335469	0.000283079	0.241372172	0.188263824	0.095887877	0.2252441	0.193015031	0.178765865	0.16391242	0.171453027	0.349758282	0.259350183	0.238328	0.00199459	0.17856873	0.150923626	0.179178276	0.203281885	0.144325728
BPNT1	-	Alu	no-conserve	0.003102932	0.018015336	0.010284057	1.07E-06	0.018391783	0.011822272	0.640352714	0.019630053	0.035982009	0.000735489	0.020021643	0.009717769	0.017496708	0.011537842	0.015049333	0.441674922	0.01703588	0.017768916	0.002014006	0.012595165	0.019570032	0.704766076	0.031203439	0.032722984	0.412050293	0.023141972	0.024107903	0.514302335	0.016776969	0.01310879	0.696818928	0.012660446	0.014763696	0.759017534	0.012228008	0.01922588	0.436670198	0.012598848	0.010809861	0.25501428	0.013205178	0.004464286
BPNT1	-	Alu	no-conserve	0.019020362	0.017326494	0.008924469	3.77E-09	0.02245299	0.011698363	0.959625593	0.021000021	0.025052743	7.51E-05	0.0194223	0.006748204	0.00062516	0.008752986	0.018500452	0.459432106	0.021572601	0.01847734	0.019151935	0.011280935	0.019329418	0.862790981	0.049363704	0.046851665	0.000478279	0.025684837	0.015139768	0.140519782	0.017973785	0.026290937	0.605056666	0.010819832	0.009320435	0.143414508	0.020007593	0.013521918	0.005778364	0.013509909	0.009106818	0.514184299	0.015155434	0.010416667
BPNT1	-	Alu	both	0.010211972	0.016008964	0.113818311	5.62E-24	0.019524418	0.05513598	0.002467807	0.009420692	0.13582017	0.827718722	0.013566317	0.015712601	0.005692733	0.021646498	0.032974081	0.001036634	0.053677338	0.03424614	0.680254236	0.033130052	0.030046717	0.301621853	0.019323097	0.018129734	2.21E-15	0.015219436	0.057474586	1.83E-09	0.012810856	0.059228171	0.066594551	0.050472706	0.06205127	0.075080183	0.014123499	0.055936258	0.028282826	0.022256578	0.016450848	5.44E-05	0.010283918	0.182912718
BPNT1	-	Alu	both	0.986679657	0.833421567	0.770248363	0.465604361	0.900342664	0.897107617	0.020987313	0.830015368	0.940219092	6.14E-07	0.810737251	0.719476048	0.310762206	0.86398846	0.87303419	7.14E-07	0.910089572	0.886216639	0.001452341	0.839559721	0.870189943	0.009676723	0.908227706	0.946107716	0.460919134	0.877411104	0.874616157	0.000199653	0.806750417	0.880767136	0.009186279	0.919812286	0.930913725	0.452612775	0.850224315	0.793380072	7.85E-16	0.903577107	0.834315717	0.09180461	0.861246807	0.937280702
BPNT1	-	Alu	both	0.171466089	0.168384675	0.199523498	0.005233907	0.201531393	0.182019353	0.055587661	0.174434632	0.275644736	0.003188069	0.169944124	0.137482936	0.621667398	0.199406988	0.20007471	0.822740538	0.205801337	0.201548263	0.000410775	0.160623807	0.199198616	0.235538286	0.275441883	0.293090449	0.587897291	0.194494095	0.194163917	0.061890739	0.16780823	0.195628201	0.029522732	0.200100275	0.222048918	0.528690983	0.181579615	0.198999462	8.54E-05	0.198660153	0.168389564	0.798252676	0.188388377	0.227167083
BPNT1	-	Alu	no-conserve	0.009745207	0.2197125	0.136366426	8.03E-17	0.283191996	0.178601185	0.931575118	0.240352774	0.21542809	1.65E-10	0.216748752	0.109089771	0.000333394	0.153904766	0.206828713	0.007412772	0.263751939	0.230980396	1.49E-08	0.151689451	0.234600514	0.761180957	0.401752434	0.413204797	0.000247225	0.258594331	0.191785641	0.483108238	0.207672069	0.218370853	0.701811546	0.172425883	0.173027322	0.002939292	0.355636013	0.281229675	8.79E-05	0.189582776	0.149872996	0.28522478	0.296680088	0.223119201
BPNT1	-	Alu	both	0.372960054	0.069578446	0.088544313	1.03E-06	0.095805535	0.063343376	0.017601917	0.073468264	0.140906062	0.000233317	0.062996908	0.036373817	0.000126089	0.041655908	0.06666099	0.000226471	0.096822612	0.071414008	0.000154893	0.048587214	0.072053625	0.65713515	0.150727818	0.146290613	0.561189981	0.086039349	0.083373819	0.002128944	0.061603199	0.088876205	0.640894527	0.068968921	0.073869038	0.980020728	0.09271764	0.100163373	0.000238609	0.060830959	0.043128393	0.746172599	0.068998519	0.056672932
BPNT1	-	Alu	both	0.17771315	0.023442232	0.020900319	0.186695635	0.028612262	0.026615769	0.037855484	0.024919379	0.060866844	0.413213257	0.023937318	0.020484257	0.358519685	0.024633362	0.023399662	0.343522253	0.030266238	0.025319419	0.110218076	0.020877962	0.024494232	0.001290617	0.029406122	0.045694647	0.68678848	0.026287868	0.028944649	0.789831627	0.026537617	0.026776175	0.263339186	0.028331802	0.031683279	0.194436362	0.032437892	0.027200016	6.95E-07	0.027985152	0.015764264	0.559485311	0.035018621	0.033458647
BPNT1	-	Alu	both	0.016300469	0.009748418	0.0042394	7.52E-09	0.0137421	0.006172388	0.474397947	0.009601011	0.003875969	0.024497166	0.007715335	0.00291918	0.002567741	0.005374036	0.008844312	0.241042469	0.011945237	0.006679848	0.02365917	0.004942205	0.00776904	0.115367412	0.025992291	0.017624297	0.080302892	0.014085054	0.011573977	0.01659677	0.009096166	0.015490913	0.832406914	0.007452658	0.006274683	0.076982276	0.010870412	0.009865117	0.035472219	0.006634803	0.003971759	0.919479778	0.008734022	0.019230769
BPNT1	-	Alu	no-conserve	0.386115784	0.049546099	0.044502967	1.39E-09	0.073715344	0.049743481	0.036979635	0.054971056	0.091368959	0.012475767	0.053071052	0.040063098	0.000784015	0.0451041	0.071171442	0.249334608	0.062907812	0.055446003	0.004557671	0.043343896	0.058146069	0.090154833	0.086580367	0.102896276	0.214749744	0.06272018	0.054691369	0.012727911	0.050246088	0.066833494	0.672627081	0.059432111	0.056501283	0.921718001	0.06723156	0.0650035	0.051254055	0.052472161	0.046391505	0.304311959	0.050924034	0.089576075
BPNT1	-	Alu	both	0.020579683	0.045884892	0.028377631	3.54E-08	0.054462508	0.033666771	0.98388102	0.043067758	0.038751908	0.020053675	0.036751128	0.025904284	0.004103898	0.026442819	0.041232667	0.473559949	0.045212029	0.038639794	0.05590085	0.026363636	0.032468385	0.01710036	0.077114801	0.058538927	0.003455439	0.051672018	0.037397227	0.395299334	0.039444757	0.043073271	0.421063633	0.033738555	0.035862761	0.00359215	0.051218587	0.039533443	9.00E-06	0.038331332	0.023984384	0.976017263	0.040363175	0.045546559
BPNT1	-	Alu	both	0.09174616	0.056403748	0.11412429	0.03281023	0.056599498	0.045945906	0.046035383	0.061730605	0.123544974	1.35E-08	0.053310706	0.023356711	0.001301596	0.038668366	0.05593156	6.91E-05	0.057912847	0.041646542	0.002285144	0.03948265	0.051761122	0.753695869	0.11741329	0.110378235	0.445017944	0.073030919	0.063675853	0.03649471	0.038507355	0.053759938	0.272935726	0.057788474	0.06258004	0.140299376	0.066007552	0.094323837	9.66E-05	0.048071613	0.034947208	0.614921995	0.066511418	0.115154488
BPNT1	-	Alu	no-conserve	0.728064016	0.030971852	0.031147994	9.75E-18	0.043064529	0.019516019	0.070565005	0.037186753	0.014516839	4.86E-11	0.039851246	0.011925941	0.001056314	0.01898377	0.030152467	0.066400553	0.035109484	0.027208428	0.012000491	0.018053109	0.027645091	0.145024757	0.070514482	0.057239958	0.000207629	0.044332162	0.027354243	0.446029497	0.031758608	0.035378932	0.833594037	0.020968244	0.019208847	0.485978001	0.049617944	0.047029996	0.000227981	0.027363793	0.017339823	0.072923282	0.0323847	0.050652986
BPNT1	-	Alu	chimp	9.41E-05	0.129759045	0.268820287	2.77E-18	0.18323382	0.273118722	0.003450488	0.120090877	0.512043512	0.133402893	0.140390947	0.128863713	0.001172534	0.164129293	0.20407471	2.74E-08	0.277869976	0.193094392	0.006006416	0.183979616	0.203470572	0.001931647	0.211668356	0.252708368	2.37E-05	0.135528502	0.184835467	2.60E-06	0.115148242	0.195252421	0.004150942	0.29064782	0.333728443	0.015398746	0.194454448	0.329486857	2.62E-07	0.164155297	0.118796748	0.00062436	0.136921106	0.453610652
BPNT1	-	Alu	chimp	0.625760124	0.023865451	0.034125295	0.021682538	0.038706644	0.033143166	0.288298221	0.026480836	0.055555556	0.047349973	0.025187012	0.016419362	0.310495221	0.030410556	0.030392262	0.848491021	0.035581044	0.031564733	0.014049328	0.022758132	0.036999248	0.021194928	0.060351811	0.071215111	0.651699248	0.030647162	0.030335956	0.232468761	0.024964155	0.030924773	0.887067641	0.036280107	0.036203397	0.331884423	0.034016273	0.026718362	0.524985428	0.031256394	0.02979849	0.410954998	0.026626612	0.015827518
BPNT1	-	Alu	chimp	0.648995211	0.031733936	0.029028479	0.001957207	0.0366086	0.02989201	0.395770991	0.036561775	0.021760155	0.362608035	0.034941455	0.037717923	0.065080332	0.034606509	0.049524344	0.110340539	0.037144463	0.040032526	0.043539353	0.031063204	0.040292698	0.248974899	0.068964891	0.08613551	0.362654187	0.038241484	0.034267689	0.931117905	0.0325607	0.034390178	0.229206107	0.036717111	0.043670217	0.87500296	0.064784428	0.059041964	0.108928554	0.034824847	0.029311522	0.819216999	0.049693639	0.044998454
BPNT1	-	Alu	both	0.043487365	0.020351223	0.013409545	1.78E-06	0.039562726	0.024199692	0.061579939	0.02624037	0.043936093	0.668846657	0.020625655	0.019333151	0.011964265	0.018244249	0.028294945	0.571406255	0.031640755	0.030742461	0.005531437	0.015495842	0.024302292	0.296137513	0.059820756	0.058074371	0.009099178	0.029602359	0.023057251	0.117085626	0.022259671	0.029750678	0.528122581	0.024606962	0.02595921	0.160156498	0.028408816	0.025166775	0.757963169	0.021229149	0.021049085	0.044948415	0.0186964	0
BPNT1	-	Alu	both	0.001871548	0.299911266	0.196585191	3.00E-30	0.372579966	0.206600709	0.203089552	0.33493549	0.223696145	1.07E-12	0.392185774	0.221802408	0.009921947	0.264353137	0.306493252	0.488739692	0.336102243	0.322323421	2.58E-08	0.251470099	0.352476515	0.249188202	0.538759299	0.575265443	4.51E-09	0.380187823	0.269655763	0.921029653	0.280963596	0.265894961	0.988010971	0.259652125	0.258830384	0.007286248	0.435606033	0.360478756	2.36E-05	0.291031719	0.235576938	0.384209457	0.425193487	0.364422726
BPNT1	-	Alu	chimp	1	0.658249783	0.650503016	5.04E-20	0.769412038	0.653537352	0.398954872	0.702270809	0.762912209	4.23E-12	0.702474326	0.528336794	0.057069856	0.662390162	0.706097431	0.001546749	0.756038185	0.725279388	1.08E-05	0.63891671	0.720352596	0.045877937	0.834671505	0.862633048	3.25E-07	0.762442834	0.685563815	0.129877817	0.645965528	0.697944326	0.42649898	0.704399834	0.717576744	0.877594454	0.736494178	0.760642024	1.41E-13	0.709091142	0.612650626	0.394695939	0.769732204	0.842532468
BPNT1	-	Alu	chimp	0.516340922	0.015024482	0.016958737	0.000459251	0.022642961	0.016586968	0.78111999	0.016506791	0.015359477	0.029569127	0.013766591	0.006984367	0.104835467	0.014987307	0.013835433	0.414752642	0.017663046	0.016657519	0.003376097	0.012333503	0.017071235	0.005341498	0.036761875	0.030773895	0.010158899	0.02129028	0.014688945	0.835247499	0.015386018	0.012800944	0.862587308	0.012429078	0.01238152	0.003249219	0.018046257	0.00786635	0.011131138	0.01545033	0.017460813	0.698910266	0.015675332	0.008928572
BPNT1	-	Alu	chimp	0.065956404	0.01121057	0.039713554	0.103485748	0.015391638	0.014811209	0.652969015	0.007591195	0.005050505	0.241965109	0.007774496	0.005282213	0.007831549	0.013096534	0.015024745	0.520076591	0.01836109	0.01604157	1.43E-05	0.007350379	0.019284397	0.043330206	0.023643277	0.019255935	0.256973197	0.012898389	0.013848389	0.001381436	0.007833672	0.019867256	0.264779492	0.011268104	0.013408338	0.965555593	0.012409665	0.021921778	0.009958753	0.008625579	0.005203917	0.701706408	0.009892164	0.018518519
BPNT1	-	Alu	chimp	0.005656174	0.123760031	0.078420407	5.69E-22	0.177138556	0.085586432	0.150003407	0.136186781	0.195728291	9.08E-08	0.113876892	0.053307672	0.023898431	0.101596178	0.122778383	0.125822764	0.135210908	0.142737384	0.000764093	0.089742151	0.126979208	0.54326129	0.275422621	0.255124467	2.02E-05	0.161818879	0.105335096	0.81706614	0.122457578	0.114551144	0.658203251	0.101575843	0.096142979	0.005198493	0.154274731	0.104895804	0.000769394	0.116908323	0.08885732	0.039633697	0.121415498	0.025925926
BPNT1	-	Alu	chimp	0.536746956	0.180859268	0.198243365	2.10E-11	0.250768	0.189959431	0.404622774	0.183519291	0.147416413	1.53E-05	0.220406011	0.162765689	0.209877429	0.167726645	0.192202714	0.433879017	0.217151883	0.225565384	1.97E-07	0.16032663	0.236701362	0.215349578	0.267768889	0.295434657	0.794060704	0.219539596	0.216083207	0.010001756	0.168883481	0.226507973	0.06049527	0.19272934	0.174483431	0.033636055	0.226314288	0.267364867	0.012694757	0.183861754	0.162063353	0.060080255	0.173295902	0.059259259
BPNT1	-	Alu	chimp	0.2878629	0.021214407	0.036087437	0.123248762	0.02985855	0.027765679	0.28195475	0.022797827	0.048185941	0.454550692	0.025716894	0.022353463	0.54266151	0.022683939	0.021117017	0.262889301	0.030374584	0.030352043	0.048420423	0.021999963	0.028250503	0.024512571	0.027452262	0.022622051	0.763197376	0.028207627	0.030429114	0.050598175	0.020902558	0.031197703	0.360112346	0.021854255	0.023747602	0.606580917	0.022643304	0.022250248	0.004032731	0.024476325	0.016483029	0.078816813	0.028721804	0
BPNT1	-	Alu	chimp	0.933461987	0.075078799	0.076106434	0.000418084	0.108649161	0.089596186	0.279738555	0.083680941	0.106703747	0.138416252	0.080258305	0.066905484	0.176303113	0.086779703	0.102907904	0.368996853	0.0995628	0.102549408	0.000118978	0.075711025	0.10817002	0.909432182	0.12245548	0.122896411	0.57371668	0.100955811	0.103720526	0.032154791	0.079591598	0.098821074	0.963562349	0.094041385	0.091344916	0.808344268	0.077337751	0.080671886	0.000471954	0.09800132	0.075565829	0.671626654	0.076143349	0.059195402
BPNT1	-	Alu	chimp	0.092921944	0.15349668	0.120297308	1.42E-09	0.220300587	0.168849957	0.133589847	0.173770591	0.107539682	0.001887016	0.171008054	0.132186201	0.00038188	0.174047619	0.229985035	0.00749115	0.201337983	0.221939183	1.02E-08	0.15294497	0.234855644	0.313425758	0.278138937	0.299075262	0.210917671	0.188065323	0.171163225	0.01374927	0.155287662	0.207499134	0.335897253	0.179866849	0.18376085	0.026829283	0.188520709	0.145684071	0.003209923	0.177345847	0.155330284	0.785578559	0.158937279	0.156645022
BPNT1	-	Alu	chimp	0.435267542	0.114505614	0.104799205	5.17E-10	0.115698207	0.082410456	0.433691022	0.12213712	0.080194601	7.36E-10	0.132074672	0.067146957	5.06E-07	0.069945437	0.114298511	0.001214673	0.122321725	0.097161485	0.000266269	0.085058548	0.111170749	0.639829389	0.194693135	0.187309769	0.011614003	0.120017531	0.097339175	0.910832745	0.101232164	0.103895205	0.138440981	0.104011101	0.111606321	0.02105725	0.181536998	0.139900302	0.004410188	0.103240247	0.087597985	0.861739725	0.158415378	0.148390151
BPNT1	-	Alu	no-conserve	0.134111002	0.006169526	0.002482281	2.49E-06	0.011172523	0.006951719	0.329518023	0.006178765	0.009259259	0.473981662	0.007112235	0.006032588	0.015813293	0.006634641	0.006886011	0.067049338	0.007571452	0.008356329	0.183568898	0.004733272	0.006486556	0.889867519	0.011239887	0.015457083	0.008264664	0.0094162	0.006886442	0.428801178	0.006734975	0.009894192	0.072141711	0.006129105	0.008056159	0.613536797	0.006161566	0.007686692	0.551909925	0.007106184	0.007102375	0.898500051	0.007721324	0.00862069
BPNT1	-	Alu	both	0.032047714	0.046320056	0.077387178	0.000143534	0.083731155	0.066950028	0.71608345	0.05662256	0.060524425	0.000824387	0.065679761	0.043803475	0.921997576	0.065793056	0.062445147	0.610235665	0.074618288	0.075336939	0.014606286	0.052242263	0.070888816	0.02477994	0.095707517	0.120176538	0.075694313	0.074119174	0.087572565	0.016914571	0.058291377	0.082402539	0.00468248	0.068711598	0.083455605	0.490962689	0.078085046	0.090367593	0.016306875	0.069453564	0.055551569	0.18647422	0.084667189	0.126671265
BPNT1	-	Alu	both	0.73813977	0.017377746	0.027407914	0.000518993	0.021804882	0.016820892	0.305124016	0.017369326	0.030314469	0.054516633	0.016520593	0.01010577	0.005193597	0.007927321	0.014084917	0.227381306	0.021103318	0.014917832	0.001132978	0.010866572	0.018943679	0.891295532	0.032108513	0.032477567	0.130664119	0.020344592	0.015097057	0.739567053	0.018585019	0.019971714	0.465672591	0.014374551	0.015531234	0.007161198	0.017082716	0.009683296	0.015058253	0.01364491	0.008948674	0.378366326	0.013668865	0.02424569
BPNT1	-	Alu	rhesus	0.032100675	0.021994406	0.014862022	1.58E-05	0.027644641	0.017224258	0.074972967	0.022636084	0.004444444	3.02E-07	0.022065031	0.005200022	0.000295936	0.009374086	0.016770376	0.491304659	0.024588702	0.018904952	5.42E-07	0.013769456	0.024604015	0.134063191	0.059265367	0.041816276	0.000945309	0.026520618	0.01579584	0.420993708	0.018834701	0.014540113	0.480598475	0.014560341	0.016252835	0.035053148	0.016344346	0.008464793	0.004669802	0.014535542	0.010475288	0.172260107	0.011235265	0
BPNT1	-	Alu	both	0.01040809	0.181428817	0.110495442	8.19E-20	0.170096172	0.087003264	0.225440904	0.189974268	0.10602352	4.02E-15	0.178911401	0.058203054	8.97E-05	0.093216235	0.134724001	2.94E-05	0.17775178	0.132884256	0.0045183	0.106022019	0.131508836	0.545458369	0.319004876	0.330603288	5.51E-13	0.185483084	0.089058121	0.008202309	0.175974697	0.113229039	0.918614169	0.118970613	0.115567597	6.44E-06	0.201345548	0.097512427	1.04E-09	0.12630865	0.078883625	0.51923006	0.15900086	0.124244204
BPNT1	-	Alu	both	0.005594841	0.026758959	0.010642271	1.36E-17	0.034515296	0.011955166	0.847538992	0.025772906	0.02039627	0.000291448	0.01840203	0.007375821	0.031054488	0.011720644	0.013257182	0.135764612	0.02125467	0.015070009	0.00115972	0.008741909	0.013788196	0.047381127	0.050686268	0.036278386	3.09E-07	0.033285361	0.014384573	0.50133352	0.02424866	0.018667295	0.534781084	0.015370173	0.015683602	0.411829016	0.021492375	0.016265023	2.30E-05	0.018292986	0.009531883	0.410886984	0.020246725	0.009615385
BPNT1	-	Alu	both	0.011057101	0.022188374	0.00929264	2.29E-22	0.030636441	0.008076792	0.017753903	0.02356459	0	3.91E-06	0.018192605	0.006444412	2.94E-05	0.007118453	0.013839716	0.002502595	0.020922897	0.011506235	0.003097051	0.007555674	0.01247479	0.667328024	0.047235832	0.043088753	1.29E-06	0.028511465	0.012272539	0.240746331	0.022116638	0.01825855	0.541667852	0.010770689	0.011955947	0.025625381	0.019728464	0.010216835	0.001392846	0.013500511	0.008106085	0.091117562	0.016562328	0.030952381
BPNT1	-	Alu	chimp	0.182196114	0.014015639	0.035586072	1.28E-12	0.014706056	0.030639343	0.003203681	0.008519569	0.045865426	0.806008651	0.012208762	0.012793775	0.141333061	0.01912567	0.022622133	0.003835449	0.029030965	0.017410786	0.191223535	0.017570904	0.018980735	0.065469878	0.015343906	0.014334766	0.000413481	0.013547993	0.029613777	8.64E-05	0.010373666	0.032013113	0.354062406	0.026636718	0.022671735	0.947327678	0.012870245	0.026374461	0.006365969	0.016872555	0.010893	0.04071021	0.013106696	0.056036325
BPNT1	-	Alu	both	0.245524628	0.04046742	0.031394407	3.78E-12	0.065241357	0.03296089	0.344629815	0.048633752	0.025518282	2.32E-06	0.046861389	0.02132607	0.02257012	0.033558617	0.045162238	0.00837657	0.052804128	0.038534713	4.32E-06	0.02743796	0.048739998	0.499921169	0.104995452	0.107701219	0.000151807	0.063991025	0.040414006	0.831291144	0.042925884	0.042261857	0.548435187	0.032026165	0.031653009	0.032585604	0.052425528	0.036817899	0.000142443	0.035131637	0.022402716	0.847115974	0.029640572	0.023965142
BPNT1	-	Alu	chimp	0.110111744	0.030460651	0.018564934	5.68E-17	0.062338048	0.023075919	0.26189776	0.040726517	0.053015873	9.95E-06	0.035098295	0.012342021	5.26E-05	0.017467095	0.03057051	0.73064405	0.043801999	0.037714388	6.74E-06	0.021238724	0.047127529	0.131875639	0.099022965	0.077452017	3.78E-06	0.057187281	0.027645591	0.817367368	0.031172638	0.029127812	0.587871119	0.023189056	0.020469423	0.040304409	0.043247816	0.034288991	0.01302817	0.02506038	0.017149405	0.622250983	0.023309818	0.013888889
BPNT1	-	Alu	no-conserve	0.610687816	0.011722924	0.016433296	0.004870903	0.018523761	0.016257938	0.097733097	0.011322314	0.033673541	0.623797832	0.011770297	0.011699784	0.011292769	0.012728389	0.01291247	0.853968795	0.016117181	0.013950668	0.000463438	0.010796989	0.018859279	0.761407888	0.018143817	0.017824644	0.076280464	0.017041266	0.017418649	0.136338616	0.014047926	0.020574555	0.271920796	0.013165844	0.011587082	0.367989041	0.017698904	0.018999312	0.109666042	0.014900117	0.011073143	0.134379154	0.011605161	0.02169129
BPNT1	-	Alu	chimp	0.126038803	0.116689181	0.143701922	2.91E-15	0.15901856	0.106440562	0.268672039	0.13649226	0.096084845	0.000260047	0.134976917	0.098867387	0.280002342	0.123028346	0.130475097	0.004972407	0.142840712	0.11943838	2.11E-05	0.097862482	0.136154821	0.315550409	0.230740039	0.240766718	0.081455048	0.156749802	0.132999518	0.086398989	0.120507539	0.140830409	0.50044208	0.113034383	0.106347764	0.091597139	0.151394396	0.123513521	9.78E-08	0.127486981	0.094355649	0.677358947	0.087649737	0.073372463
SDE2	-	Alu	chimp	0.15535747	0.088286	0.064443202	3.79E-19	0.127073571	0.05751615	0.326902657	0.109301672	0.061887694	6.04E-07	0.10176656	0.048757606	3.31E-06	0.035793712	0.091342357	0.159524153	0.090079514	0.078418755	1.25E-07	0.043168617	0.089050778	0.814905898	0.125240162	0.124305493	5.89E-09	0.111187944	0.056352405	0.011058305	0.116828012	0.073110176	0.755007483	0.063156474	0.064561431	1.67E-06	0.088690918	0.025925253	0.014721242	0.081978359	0.062172842	0.465259609	0.075542459	0.033812831
SDE2	-	Alu	no-conserve	0.014863532	0.019135943	0.005060948	1.44E-11	0.034834704	0.013098017	0.828195679	0.027169546	0.0228739	0.000728661	0.025447386	0.010681357	7.05E-05	0.00695085	0.018334095	0.447635762	0.021670087	0.016471957	5.38E-08	0.007229235	0.021520787	0.450163541	0.041194865	0.04921729	6.95E-05	0.031677091	0.013300467	0.223233493	0.02525092	0.01654248	0.352502937	0.012810526	0.012549699	0.003352615	0.020452243	0.007667527	0.441436858	0.018178268	0.015157495	0.211630291	0.0181474	0
SDE2	-	no-repetitive	chimp	0.036075161	0.036238111	0.014557036	2.66E-18	0.050098352	0.017544461	0.484044954	0.040474914	0.021564482	8.63E-06	0.035116375	0.01005989	0.004152034	0.015345773	0.035950327	0.66778377	0.034511168	0.032645761	0.292049888	0.021594186	0.025879029	0.850314034	0.036887126	0.039743208	2.81E-08	0.042136269	0.013930666	0.004681748	0.045907665	0.020567368	0.672187696	0.027502778	0.029729799	0.032624011	0.02727422	0.022449772	0.022481344	0.03774586	0.023385816	0.869887242	0.030856423	0.019615385
SDE2	-	no-repetitive	chimp	0.06473185	0.098719662	0.06681516	8.32E-20	0.13080921	0.055132298	0.080011003	0.114090031	0.039655172	1.12E-08	0.121283339	0.046387802	5.53E-05	0.036802334	0.087373158	0.11029699	0.102978447	0.087564586	0.00061702	0.046611587	0.076997243	0.676465107	0.136000049	0.134869686	3.24E-08	0.124268642	0.062783144	0.001209479	0.129766535	0.071117074	0.737846332	0.07192086	0.070575477	0.00016112	0.120111962	0.056137287	0.000521789	0.08428447	0.052444815	0.143230465	0.075812081	0.010869565
SDE2	-	no-repetitive	no-conserve	0.570469894	0.055565707	0.044716565	5.09E-11	0.072574966	0.034729146	0.019925937	0.070220644	0	2.15E-07	0.079282961	0.029588124	0.006056679	0.016089683	0.039298891	0.078967592	0.058493304	0.043665874	0.083944862	0.027000107	0.043810514	0.276507891	0.085853168	0.092435326	0.00037514	0.067719743	0.039603043	0.000764525	0.080375718	0.037793165	0.011372392	0.030921981	0.04187007	0.000684798	0.068804932	0.028710816	0.447059047	0.044841019	0.034143638	0.093614674	0.041443866	0
SDE2	-	no-repetitive	chimp	0.130845373	0.240430546	0.179851113	6.04E-30	0.291700286	0.143725051	0.476248	0.265269193	0.194845938	2.63E-11	0.260011004	0.123599765	0.000190857	0.122796418	0.198894134	0.407751611	0.234027198	0.224768948	0.00028952	0.147700619	0.223827522	0.341971984	0.31339913	0.341770014	3.26E-14	0.280256697	0.155206484	2.19E-06	0.293048688	0.165298293	0.634877479	0.194351803	0.197984546	8.74E-05	0.228103675	0.113809806	6.44E-05	0.206050341	0.153221286	0.343184262	0.143875116	0.060307018
SDE2	-	Alu	chimp	0.48268929	0.058995478	0.043107537	1.44E-17	0.099573586	0.042217849	0.104236185	0.061390068	0.009259259	0.000717718	0.082616219	0.050328193	0.017164861	0.037218402	0.058723846	0.155255166	0.068211603	0.075954015	0.005191973	0.045567864	0.068308948	0.818295151	0.079611486	0.077974814	1.77E-06	0.083390961	0.04223548	0.00095732	0.088493301	0.040887721	0.14143971	0.064180129	0.07449127	5.11E-07	0.084021708	0.021051309	0.034518378	0.078953348	0.054378193	0.507093753	0.015700221	0
TCEA3	-	Alu	chimp	0.479349217	0.069327368	0.0754447	0.000350451	0.153161832	0.1216243	0.534014981	0.099087594	0.069444444	0.000127022	0.043891865	0.073366543	0.000824575	0.07432573	0.115821559	0.704403841	0.136665462	0.133446835	0.019911671	0.105541132	0.130720366	0.320317275	0.139622653	0.147871743	0.002682305	0.127587925	0.090445969	0.00050459	0.069953826	0.148225754	0.464842716	0.131198401	0.138485101	0.98556822	0.105301774	0.102515126	0.062646397	0.128491975	0.108959408	0.364964144	0.025354704	0
TCEA3	-	Alu	no-conserve	0.010511213	0.022708301	0.041391607	0.000241695	0.062705038	0.045520176	0.561998818	0.034954862	0.037037037	0.114049886	0.022769426	0.024224961	0.00085817	0.028707565	0.049303341	0.188621263	0.057074983	0.052349332	0.000235975	0.031630701	0.050173934	0.828602843	0.04936787	0.048545409	0.716485752	0.052689133	0.062007906	0.010237849	0.027924536	0.049716787	0.012069967	0.040146467	0.050714366	0.874750848	0.037731297	0.03232493	0.001232489	0.055857775	0.041554534	0.012731834	0.01746735	0.050263505
TCEA3	-	Alu	chimp	0.054580702	0.015166909	0.029735934	0.000173418	0.027129056	0.023282792	0.336823419	0.017767105	0.030012772	0.017396954	0.009733635	0.011940901	1.10E-06	0.008641451	0.026133568	0.181926538	0.024270795	0.02109642	0.025325399	0.019676999	0.026657408	0.141263172	0.027976594	0.022377111	0.034181086	0.023461227	0.025110266	0.608657909	0.01567685	0.014926533	0.264196788	0.019949429	0.02320107	0.867840075	0.016458351	0.019677075	0.016718312	0.025344098	0.018780175	0.006128432	0.005845889	0.036962366
ZNF669	-	Alu	no-conserve	0.516540081	0.033708471	0.023533484	6.97E-10	0.058513221	0.026285823	0.995254628	0.030751867	0.028985507	0.136110417	0.039751106	0.026012225	0.002070335	0.012416754	0.044125857	0.013023983	0.02380287	0.035061892	0.024171835	0.027069711	0.051949571	0.00074014	0.018219729	0	8.57E-06	0.035643725	0.007933446	0.450172317	0.045620122	0.030836163	0.567053657	0.038126503	0.043571576	6.66E-05	0.066793842	0.022154666	0.415848972	0.052335925	0.046670344	0.189628543	0.047008204	0
IFI6	-	Alu	rhesus	0.122543782	0.000827416	0.001122069	1.21E-12	0.001098888	0.000643717	0.57489537	0.000843691	0.000628931	2.59E-08	0.00094954	0.000500943	0.39352239	0.000702654	0.000894797	0.076725098	0.000744269	0.000918721	0.822042126	0.000584492	0.000606381	0.626052554	0.00109516	0.001032885	0.009728358	0.001164265	0.000647208	0.641197305	0.0007718	0.000522891	0.963585587	0.0007541	0.001159814	0.033407375	0.001042105	0.000812363	0.071157181	0.000661587	0.000511192	0.050150724	0.000870813	0
IFI6	-	Alu	both	0.246516814	0.002975677	0.002994188	2.61E-08	0.003178691	0.002302123	0.211335815	0.006242982	0.001073537	0.00012588	0.003157587	0.00247102	0.066307283	0.002917761	0.001745739	0.210759687	0.002348217	0.002502406	0.002452475	0.002158892	0.003838483	0.824574741	0.003027739	0.00306771	0.341447116	0.003267601	0.003134629	0.932090385	0.00260737	0.002433241	0.939903664	0.002430064	0.00287469	0.08015803	0.003273385	0.003070734	0.210432077	0.002053844	0.001753531	0.767303697	0.002818107	0.004031218
IFI6	-	Alu	rhesus	0.005482876	0.001930951	0.001285562	2.41E-10	0.002246442	0.001405317	0.987891958	0.001793713	0.002290584	9.48E-09	0.001637661	0.000611695	0.042217765	0.001217709	0.00153573	0.637083641	0.001544209	0.00155366	0.550285201	0.001486204	0.001171932	0.142436863	0.002152731	0.001386253	0.004107014	0.002303146	0.001498684	0.475452601	0.001528002	0.001704596	0.698592754	0.001466932	0.00147868	1.74E-06	0.003275857	0.000974029	0.005468638	0.001422028	0.000926088	0.677049553	0.002496544	0.003012048
IFI6	-	Alu	rhesus	0.02835309	0.001638843	0.000928382	1.16E-12	0.001613608	0.000839598	0.010029198	0.001885476	0	1.10E-05	0.001473878	0.000815586	0.027127526	0.000852585	0.00132153	0.877022077	0.001167808	0.001183793	0.016770501	0.00103417	0.001885384	0.151183765	0.001955432	0.001377407	0.030776676	0.001887396	0.001343536	0.297612167	0.00135453	0.001483186	0.220943254	0.001473779	0.001018319	0.000954729	0.001636961	0.001881965	0.494740997	0.00101656	0.000912139	0.87912484	0.002179172	0.005952381
MECR	-	Alu	both	0.003883933	0.071704223	0.015311005	3.15E-05	0.075025245	0.114801046	0.793942878	0.105034462	0.113519092	0.738128398	0.028035675	0.024473304	0.000107197	0.058345312	0.163978283	1.44E-06	0.058629363	0.110729574	0.324805459	0.112614488	0.138655691	0.003687852	0.025196012	0	0.00450227	0.04919627	0.014383892	0.553045293	0.039664096	0.022154316	0.532449151	0.068145447	0.085586899	0.268321788	0.075822716	0.054988802	0.928596911	0.117406266	0.121966958	0.939898646	0.052857803	0.066666667
MECR	-	Alu	no-conserve	0.560768137	0.022873805	0.021637427	8.70E-12	0.032958834	0.083032001	0.238641339	0.023940955	0.048976608	0.623330591	0.010809553	0.015858325	0.003035522	0.023992769	0.060554358	0.000943216	0.037438252	0.058796057	0.134907327	0.045780059	0.062867215	0.104132409	0.008261867	0.006	0.001067662	0.013186983	0	0.150623539	0.024953841	0.034473965	0.788550558	0.03375244	0.037092157	0.228563452	0.025868846	0.039250312	0.638146511	0.039591679	0.034051923	0.579253466	0.016220914	0.035714286
MECR	-	Alu	both	0.12432137	0.042344956	0.023803828	0.039409066	0.042283942	0.048989014	0.419824579	0.045201189	0.079272255	0.512938228	0.012680516	0.016644169	0.013800557	0.030150682	0.060288624	0.000510879	0.028259735	0.053067025	0.616299332	0.049733381	0.056576828	0.139395496	0.012671379	0.005	0.003318093	0.021855843	0.004525862	0.399577445	0.024788234	0.012079832	0.051486398	0.027931596	0.014655606	0.001923325	0.034079316	0.003030303	0.107138479	0.056521499	0.04073234	0.991515916	0.030597205	0.025
SDC3	-	no-repetitive	no-conserve	0.851763664	0.029092652	0.027659362	1.75E-23	0.052055358	0.019490509	0.044779539	0.030668292	0.007209948	4.78E-08	0.031271605	0.011857557	0.11021937	0.018139311	0.023413364	0.000569593	0.030573161	0.02376657	0.069664572	0.016477695	0.026642509	0.002744553	0.034069195	0.04524677	1.32E-05	0.042470055	0.026799482	0.988281371	0.036612384	0.03428283	0.592184129	0.024566642	0.024302042	3.36E-07	0.029684315	0.012156792	0.002581894	0.025557646	0.019368853	0.197388777	0.031059342	0.01132866
SDC3	-	no-repetitive	no-conserve	0.102796819	0.015347087	0.009211485	2.68E-16	0.028109884	0.013875972	0.512553853	0.016355188	0.008318794	0.337355309	0.013541767	0.014119437	0.199066025	0.011838495	0.014391077	0.721963357	0.014345901	0.01544278	0.849750123	0.013385651	0.012637975	0.011797981	0.020636133	0.028511178	3.67E-07	0.022384412	0.011586714	0.931061114	0.016708484	0.015240903	0.544219656	0.017569457	0.01752521	0.083265661	0.017100242	0.013564926	3.31E-08	0.019721535	0.01028953	0.416535282	0.01573735	0.01551961
PSMB2	-	Alu	chimp	0.450656548	0.249405312	0.209778169	1.81E-20	0.308358497	0.174712822	0.501741458	0.307249854	0.236319909	8.48E-17	0.286854441	0.097496082	5.41E-08	0.106121472	0.191263246	3.09E-17	0.310506985	0.199231517	0.000260351	0.141956681	0.18323113	0.064341858	0.440590792	0.505989417	0.004764734	0.309848949	0.244031844	0.47286918	0.249661919	0.255913039	0.01095147	0.147922492	0.161430601	0.003390071	0.243316479	0.167378028	1.33E-07	0.195873527	0.140160201	0.349687446	0.033879057	0
PSMB2	-	Alu	chimp	0.000724775	0.066393645	0.037183163	4.35E-14	0.076643712	0.046055235	0.028014188	0.079600264	0.030371208	2.91E-10	0.079885222	0.039985433	0.051962422	0.032489636	0.044159925	0.000806391	0.066256585	0.053771829	0.000489339	0.03656321	0.055816968	0.706041429	0.123693685	0.126910979	0.008348154	0.080061619	0.064068759	0.982423741	0.065895534	0.061333068	0.758737616	0.040656324	0.041527787	0.004950965	0.056939064	0.036601661	0.011651194	0.046410284	0.039022183	0.120776105	0.030064351	0
PSMB2	-	Alu	chimp	0.402136385	0.033092683	0.041077132	0.510470738	0.035492367	0.037814247	0.041801368	0.034097255	0.061586825	3.87E-05	0.034769823	0.023840096	0.96090885	0.03146219	0.030757447	0.236679109	0.043610565	0.038642079	0.568228155	0.033265952	0.032101672	0.097410493	0.039151476	0.043518259	0.341865079	0.032675774	0.037179414	0.057510285	0.026468911	0.03437176	0.322577809	0.032658049	0.028581679	0.2648742	0.028672512	0.028614733	0.001776617	0.031664811	0.023749288	0.235170262	0.029012815	0.008064516
PSMB2	-	Alu	chimp	9.04E-05	0.05406906	0.013906414	4.75E-22	0.069764909	0.022257458	0.15581441	0.066151696	0.027731327	8.80E-13	0.0574121	0.01489245	0.006337135	0.018927043	0.030473668	8.65E-06	0.059393384	0.036539964	0.014384481	0.021336866	0.032361076	0.141138413	0.120681404	0.127855114	3.65E-05	0.069024011	0.035465566	0.614866663	0.054120296	0.042588525	0.528245112	0.028298435	0.02275594	8.72E-05	0.03771237	0.017847282	8.94E-06	0.036722726	0.021183337	0.015621882	0.033502153	0
PSMB2	-	Alu	chimp	0.576478422	0.78743356	0.767812369	0.000109124	0.827091552	0.795122971	0.069795286	0.785759331	0.858285699	7.48E-11	0.786391738	0.680435283	0.886869126	0.745713951	0.742125811	6.97E-11	0.803914777	0.736616288	0.930177407	0.737373492	0.74197385	0.008552839	0.819675323	0.863996326	0.002057304	0.800517507	0.767477424	0.603373227	0.766505502	0.752617823	0.006173795	0.792196764	0.819692106	0.648395587	0.822891015	0.77492558	3.03E-12	0.81376352	0.738276618	0.041136787	0.8212495	0.900189394
PSMB2	-	Alu	chimp	0.000606658	0.11119614	0.04109612	1.29E-20	0.1296408	0.051365547	0.382233569	0.136809022	0.082161753	1.45E-15	0.167033088	0.052739376	0.002737461	0.037630254	0.059403858	3.46E-10	0.117864234	0.065889529	0.042842307	0.050360666	0.064339071	0.560085447	0.247603159	0.25401878	0.001802323	0.139358239	0.092281023	0.48655012	0.087648055	0.080225574	0.252169205	0.051695499	0.05381219	2.31E-05	0.122861523	0.070495539	8.99E-05	0.066404548	0.042985312	0.085411401	0.073428415	0.026333789
PSMB2	-	Alu	no-conserve	0.485019144	0.066511795	0.067127201	3.16E-07	0.069074753	0.041153917	0.781168012	0.085782747	0.069773568	1.85E-13	0.095197907	0.034122908	4.72E-07	0.025768483	0.063561587	0.037345831	0.071372027	0.055933087	0.000505185	0.035551316	0.05948446	0.687443333	0.124135959	0.115354179	0.002324223	0.0927597	0.063906227	0.880324822	0.055639187	0.047831306	0.064765964	0.03781115	0.044291338	0.228452539	0.070413555	0.059320433	0.021888922	0.054198321	0.040880778	0.88937456	0.052088634	0.045955882
PSMB2	-	Alu	chimp	0.024335805	0.059264048	0.032743551	4.73E-13	0.053335347	0.01886707	0.554410017	0.071037756	0.043803419	1.65E-11	0.0698834	0.019354753	0.020774259	0.013783616	0.030912236	1.83E-05	0.054792569	0.029362682	0.014926236	0.021765129	0.033544226	0.862854827	0.135763394	0.131174887	0.00065741	0.070547683	0.03771467	0.796916636	0.048910416	0.045226881	0.056159129	0.023165949	0.026412629	0.000704513	0.052975938	0.025605141	0.004162641	0.028024067	0.016539333	0.313219992	0.040159935	0.033333333
PSMB2	-	Alu	chimp	0.672731887	0.031388499	0.039371049	8.92E-05	0.039757197	0.022701464	0.784613821	0.035484552	0.033730159	8.70E-09	0.043146145	0.014684259	0.066997945	0.014959292	0.022482617	0.000545547	0.041616735	0.025232341	0.002433452	0.017801526	0.030126596	0.957263809	0.085306747	0.080345994	0.002346737	0.042963073	0.027424577	0.146864959	0.030282214	0.033390574	0.15482458	0.017938419	0.023239662	0.528819805	0.047980791	0.069470954	0.020381172	0.017930151	0.012059303	0.040183769	0.022591325	0
PSMB2	-	Alu	chimp	0.978147578	0.03600906	0.041388573	0.001517879	0.03874273	0.027315538	0.229225553	0.038380194	0.052231825	8.94E-09	0.048939415	0.019346735	0.02112614	0.015993366	0.027260102	0.456344051	0.036574782	0.038907507	0.017836743	0.021593223	0.035936554	0.531010534	0.087462166	0.091080318	0.032106894	0.046016481	0.031560042	0.864106812	0.033981047	0.030700236	0.731831702	0.022908105	0.023204864	0.078434028	0.042663206	0.037172523	0.453680325	0.021582459	0.022602697	0.398206323	0.02939513	0.029411765
PSMB2	-	Alu	chimp	0.436210633	0.805201468	0.789849127	2.05E-07	0.821798203	0.77718892	0.588897994	0.833642991	0.78128886	1.10E-12	0.841767951	0.710024998	0.712125105	0.796722761	0.806491973	0.000199327	0.843249207	0.815377226	0.84574546	0.75713352	0.776466828	0.002826079	0.910164499	0.948033497	0.006017504	0.816277801	0.7891573	0.16968033	0.800148892	0.780356919	0.209473743	0.816273342	0.799143566	0.294640785	0.812807197	0.796286979	0.000403075	0.786017395	0.745785698	0.219015978	0.81033874	0.593977591
PSMB2	-	Alu	chimp	0.201459073	0.030760645	0.030788747	0.000610197	0.041883657	0.032276944	0.347413788	0.032857283	0.021214681	1.76E-06	0.036550999	0.019432167	0.660075967	0.029921007	0.030971628	0.14273088	0.046577127	0.042089185	0.067923115	0.0283385	0.037921263	0.000137056	0.05145128	0.072192045	0.694781173	0.032508667	0.032047745	0.455922582	0.040901338	0.041522194	0.884776793	0.027923857	0.029733468	0.034668556	0.037863356	0.028504949	0.992786567	0.027277746	0.027548877	0.129684157	0.028228417	0.007352941
PSMB2	-	Alu	chimp	1.53E-06	0.620505652	0.397018342	3.40E-31	0.645993267	0.448662549	0.08685788	0.674112573	0.499584229	4.59E-20	0.660536379	0.359985597	4.83E-05	0.391340362	0.482008212	1.25E-15	0.63303134	0.506714388	0.042342365	0.446973273	0.47785797	0.517494508	0.776962129	0.827692635	1.55E-11	0.663206904	0.526772934	0.082761794	0.621214117	0.557472626	0.059282001	0.474630014	0.500867456	7.09E-07	0.561403853	0.386194735	8.93E-11	0.552126249	0.45397192	0.431795238	0.50375381	0.587719298
PSMB2	-	Alu	chimp	0.962472061	0.098511749	0.107034774	6.78E-10	0.14901306	0.097616415	0.476357991	0.11391237	0.084139985	2.89E-08	0.129049562	0.069085044	0.003561257	0.063790568	0.088209039	0.016393466	0.124187546	0.106957946	0.011268114	0.071857264	0.096960225	0.083902001	0.20076641	0.219537016	0.283373284	0.131391837	0.111309166	0.127096386	0.109875976	0.124357197	0.83806381	0.080472672	0.080101544	0.184182214	0.133545585	0.120396358	0.5881114	0.092721645	0.088162711	0.042378912	0.105827695	0.028846154
PSMB2	-	Alu	chimp	0.251808523	0.026043013	0.024919658	3.62E-07	0.030788139	0.015691234	0.237341551	0.030843883	0.013071895	0.00096018	0.033756402	0.017918673	0.044490394	0.010720938	0.015499135	0.92539024	0.023994804	0.020930062	0.001645949	0.012662891	0.022782649	0.75456336	0.064589294	0.066057942	0.041394249	0.030392308	0.021291643	0.571991959	0.02768301	0.027159646	0.048088923	0.015436912	0.023427919	0.006027454	0.027416519	0.016619198	0.40266032	0.01835578	0.017124034	0.613710051	0.021431434	0.010416667
PSMB2	-	Alu	chimp	0.928646686	0.490189698	0.490833982	2.45E-20	0.533832144	0.388308369	0.427788062	0.530941166	0.612373737	3.67E-16	0.541529475	0.300153662	9.61E-05	0.281538992	0.363383258	7.73E-14	0.53247476	0.415319003	0.953810062	0.370232563	0.374977486	0.147731562	0.65287933	0.707270594	2.94E-05	0.50548691	0.421673379	0.90355579	0.426062353	0.439511071	0.172998284	0.404955255	0.426188898	0.004714061	0.625300829	0.535356625	4.57E-10	0.378989608	0.28696349	0.203011394	0.449530239	0.305860806
PSMB2	-	Alu	chimp	0.010481728	0.049848505	0.02257707	2.65E-10	0.05152402	0.021062545	0.032875555	0.065367571	0.008888889	6.90E-09	0.06040879	0.020606638	0.007004167	0.014462762	0.030778724	0.002023365	0.048733889	0.028579967	0.20939894	0.024817328	0.027766331	0.087407831	0.10567578	0.125993855	0.006629791	0.053993813	0.031964145	0.928039342	0.047599739	0.051875599	0.163377278	0.022910773	0.031553673	0.010218192	0.04674407	0.032444114	0.604641637	0.025437271	0.027065111	0.090163035	0.035965394	0
PSMB2	-	Alu	chimp	0.006741588	0.158741649	0.097625828	3.17E-17	0.13081557	0.068868093	0.032634353	0.173827774	0.072307692	1.22E-12	0.171161192	0.075326178	0.001023109	0.072116768	0.115286952	0.000642864	0.150966123	0.113298786	0.398834321	0.108214463	0.124789181	0.11176907	0.220510282	0.244947202	2.96E-08	0.154315227	0.087956073	0.026821444	0.15072905	0.111113757	0.714742335	0.102729907	0.104674283	4.78E-06	0.170269227	0.097393264	1.51E-06	0.122583465	0.082372671	0.071827122	0.136585943	0.038352273
PSMB2	-	Alu	chimp	0.010049616	0.517988081	0.418498645	4.61E-16	0.545258746	0.433525317	0.727459951	0.532788926	0.446957672	5.72E-17	0.548171926	0.325068231	7.10E-06	0.354737079	0.477102006	2.54E-07	0.564375995	0.490677463	0.185751832	0.4222283	0.454581214	0.017984364	0.655031021	0.725797178	5.57E-08	0.53890362	0.442003382	0.328728808	0.510832478	0.476272893	0.024425642	0.479093616	0.512042608	0.001203928	0.528324201	0.436017194	3.14E-08	0.462076034	0.379270658	0.620389619	0.409251021	0.461169468
PSMB2	-	Alu	chimp	0.000480385	0.059759696	0.023629413	2.49E-16	0.061688598	0.027505893	0.094490591	0.073571879	0.026666667	3.68E-15	0.082202636	0.021880865	1.72E-06	0.01667774	0.045080127	2.32E-07	0.062074523	0.037567999	0.366385344	0.032921593	0.036909153	0.062156897	0.13355174	0.156642271	0.009724425	0.070716805	0.051537662	0.763340477	0.059749245	0.050061111	0.042366346	0.029353193	0.034147007	0.102687048	0.036819765	0.027174843	0.208606922	0.034337156	0.02798442	0.112485276	0.021263049	0
PSMB2	-	Alu	chimp	0.003481628	0.495532237	0.391489656	9.79E-19	0.547596193	0.43578398	0.49852917	0.521924648	0.473527373	6.92E-16	0.524866784	0.330882378	0.165386758	0.391517956	0.419408254	1.79E-16	0.527976108	0.41592421	0.320445655	0.386605157	0.402183347	0.000999031	0.634211053	0.720241313	4.13E-05	0.5210849	0.450890764	0.161835361	0.489539631	0.452555502	0.029345456	0.456601256	0.482894293	0.01277554	0.481903998	0.421705854	2.47E-15	0.491887159	0.386603536	0.665426562	0.405662194	0.440243271
PSMB2	-	Alu	chimp	0.000249919	0.178208645	0.101999076	8.15E-21	0.168950038	0.1058913	0.013517354	0.208989271	0.092329546	4.60E-16	0.229484054	0.114823123	0.000295675	0.106870598	0.144572401	0.001063589	0.178872518	0.152979673	0.08904755	0.133868605	0.157007128	0.018417742	0.304753673	0.343878734	0.000214237	0.181967449	0.140582188	0.108590637	0.194993126	0.16302336	0.83431565	0.112312336	0.112081428	0.002397647	0.204788505	0.150969397	0.443344318	0.125074158	0.120245372	0.386748291	0.134173138	0.103771229
PSMB2	-	Alu	chimp	0.022268285	0.081946409	0.056062559	3.06E-14	0.101443104	0.059794128	0.430738305	0.091229039	0.122048067	2.05E-13	0.089952089	0.040800125	0.043165603	0.042022894	0.05371435	5.06E-05	0.095945917	0.069156032	0.384747921	0.055937681	0.06300532	0.018146732	0.132903045	0.154903858	0.000147931	0.100041026	0.07246334	0.430935627	0.082245086	0.068946838	0.331680897	0.056265593	0.059378341	0.023600198	0.086429968	0.066032627	0.946794857	0.065493493	0.062503064	0.133887284	0.056762768	0.019230769
PSMB2	-	Alu	chimp	0.000228685	0.009167574	0.027826122	0.415813741	0.012705657	0.00939045	0.98697385	0.009406706	0.017857143	0.004979935	0.011428784	0.005834419	0.061577555	0.005663069	0.009518722	0.295086629	0.01654455	0.018006979	0.037329316	0.009249055	0.016864881	0.331393215	0.01258072	0.016044886	0.98489483	0.013048485	0.013066696	0.732825535	0.01037131	0.010246493	0.785336295	0.009831404	0.008292885	0.448382647	0.017444758	0.018990506	0.81082186	0.01037147	0.010656631	0.845010544	0.00847286	0.009615385
PSMB2	-	Alu	chimp	0.000178647	0.164649983	0.087992391	1.83E-11	0.205691445	0.141341502	0.488953169	0.18836358	0.140740741	3.21E-09	0.170370054	0.100940688	0.01447116	0.090291586	0.123112232	0.000204088	0.165763403	0.130165163	0.044022372	0.11183	0.131399331	0.000378508	0.217277932	0.275261623	9.71E-05	0.187067835	0.142937138	0.539753105	0.161042556	0.172548669	0.059679845	0.12232068	0.135050918	0.002798927	0.185703072	0.142760742	4.56E-06	0.151857546	0.112766576	0.036714673	0.155009664	0.066919192
PSMB2	-	Alu	chimp	4.70E-06	0.201034173	0.102946525	3.66E-19	0.242540888	0.149549117	0.132280454	0.237971969	0.145938921	1.52E-10	0.227406761	0.135098648	0.010695493	0.100877026	0.132406155	0.072882448	0.1871512	0.171884548	0.149274567	0.141509701	0.15837061	0.002536516	0.291625754	0.348101084	0.000818495	0.2354725	0.191021625	0.775980785	0.190911757	0.184043318	0.302060204	0.153815442	0.162988442	0.0002935	0.238798007	0.176706714	7.03E-08	0.176544765	0.127020674	0.049232532	0.213815785	0.111471862
PSMB2	-	Alu	chimp	0.00034207	0.038143963	0.014436973	6.53E-07	0.044811982	0.026346974	0.524224533	0.048773283	0.03252924	1.45E-05	0.046440956	0.024110847	0.003337566	0.013966946	0.028178118	0.408485871	0.034457721	0.036314288	0.081605086	0.026107191	0.03391956	0.681475802	0.072552579	0.076017184	0.064444225	0.043041354	0.03125344	0.524960842	0.03556906	0.03810078	0.084119488	0.022578797	0.026704508	0.007569927	0.042593699	0.026916266	0.645395356	0.030147295	0.028424811	0.04203214	0.029705561	0
PSMB2	-	Alu	no-conserve	3.75E-05	0.156555009	0.077957485	7.08E-14	0.144407184	0.087249771	0.019356735	0.170559999	0.062910428	3.67E-13	0.180010213	0.097124726	0.00454041	0.079269869	0.110583385	0.705033204	0.130122007	0.12278283	0.017410392	0.104160311	0.132246596	0.051699854	0.21519128	0.250876255	0.005427345	0.15205447	0.121609491	0.754962914	0.141404887	0.136034741	0.856897568	0.09770589	0.094678715	0.082563014	0.162835769	0.142831841	0.781955047	0.10997188	0.111127337	0.178663787	0.135681304	0.07010582
PSMB2	-	Alu	chimp	9.24E-05	0.179532677	0.099328705	1.00E-06	0.140465392	0.104944431	0.028735639	0.179177577	0.049019608	1.01E-09	0.209496457	0.131652366	1.30E-05	0.073018371	0.133649349	0.023445455	0.155948161	0.137637655	0.354022696	0.137281526	0.125034742	0.000655159	0.198178185	0.265917207	2.96E-06	0.161437379	0.110408468	0.000890424	0.17167727	0.10640095	0.2356474	0.130485572	0.13667407	1.88E-05	0.212135116	0.14165007	0.036760418	0.136279681	0.119373789	0.003859573	0.156912835	0.015625
PSMB2	-	Alu	chimp	0.71811994	0.023255188	0.038233954	0.079623282	0.017496071	0.011968615	0.64384315	0.02095857	0.023931624	3.44E-05	0.028943286	0.013870755	0.000702605	0.009043802	0.01849396	0.073763842	0.024983689	0.014614822	0.767667624	0.01515085	0.013034419	0.179142594	0.028149913	0.039237105	0.286175009	0.022080533	0.016523926	0.098387164	0.02247344	0.026955832	0.970704676	0.016213252	0.014596969	0.975888778	0.032518719	0.038631	0.147079052	0.016020507	0.011691746	0.24550624	0.027738535	0.05962556
PSMB2	-	Alu	chimp	0.683067248	0.345162781	0.343759076	1.20E-07	0.321095487	0.267606624	0.028371182	0.337574138	0.501538232	9.67E-13	0.349409385	0.232716186	0.00246282	0.230071154	0.285856296	9.65E-07	0.340825299	0.280542251	0.301995361	0.28957808	0.269344053	0.00317884	0.346270267	0.415936376	0.000186782	0.336142649	0.29477996	0.272253886	0.324413597	0.296686185	0.037943815	0.286893403	0.303083401	0.088012387	0.485362603	0.435922708	9.57E-08	0.320738772	0.256497477	0.45455228	0.469366299	0.532738095
PSMB2	-	Alu	chimp	0.305834694	0.006836582	0.028137456	0.421973653	0.01442475	0.014318602	0.223544036	0.009194674	0.014520202	0.566527262	0.011507324	0.008962855	0.078986012	0.007299092	0.016108799	0.257379766	0.021973187	0.016558165	0.570549786	0.009661825	0.011074814	0.792195797	0.017595392	0.017985714	0.375191725	0.013123051	0.016781607	0.008453227	0.011673992	0.021835649	0.789917828	0.008344359	0.007023136	0.231641675	0.018131338	0.034511901	0.276534118	0.009586148	0.010671054	0.65739166	0.007694908	0.029411765
PSMB2	-	Alu	chimp	2.59E-05	0.416833384	0.2651285	3.60E-31	0.453393398	0.282510461	0.111608769	0.462793861	0.318968845	1.29E-14	0.43836413	0.253949413	0.000854646	0.277644542	0.344030164	0.002590315	0.386964119	0.344969185	0.049431541	0.307943541	0.338772063	0.484792354	0.603290566	0.643318881	6.50E-11	0.470235399	0.351196175	0.708020797	0.396492519	0.373187432	0.009220678	0.32329971	0.349736855	7.33E-08	0.497457326	0.349419224	3.72E-11	0.368876185	0.278845468	0.651678858	0.465092479	0.430147059
PSMB2	-	Alu	no-conserve	0.076407992	0.007452078	0.031124635	0.249344269	0.010702079	0.013138113	0.707515915	0.008976585	0.009793485	0.006408219	0.010230263	0.007698806	0.596951528	0.010322306	0.009744841	0.133959711	0.016224127	0.020443301	0.010974884	0.007336795	0.014358079	0.586356398	0.015776914	0.016432752	0.515304598	0.011835132	0.01478598	0.129163125	0.010079252	0.015206282	0.159331573	0.00759337	0.008789203	0.121924912	0.023850431	0.024622777	0.592665762	0.008684866	0.009464663	0.213629357	0.009786287	0.026190476
PSMB2	-	Alu	chimp	0.035953835	0.066304669	0.031722793	1.66E-09	0.063694353	0.03605854	0.293403265	0.082279334	0.049520793	6.69E-14	0.081022558	0.024679741	2.65E-05	0.023303481	0.048755381	0.004081348	0.068057054	0.051782726	0.178757085	0.041342151	0.052126812	0.052170345	0.125627258	0.141595103	0.000572318	0.086631575	0.056900672	0.637049448	0.061379309	0.052472353	0.003684495	0.034618794	0.04495867	0.00035901	0.082916416	0.050247699	0.001470501	0.051977974	0.036575428	0.540546184	0.047823418	0.033333333
PSMB2	-	Alu	chimp	0.000242622	0.259532764	0.144367945	2.11E-21	0.261963454	0.154014954	0.076256791	0.307789585	0.166396154	1.38E-18	0.307673008	0.127300569	5.73E-05	0.149402917	0.202344663	3.43E-05	0.298890633	0.2456586	0.330679218	0.19711559	0.20817434	0.11515522	0.44019964	0.485207448	1.07E-05	0.311846188	0.231738301	0.780203286	0.247219616	0.227358279	0.938675188	0.171891965	0.169955096	7.19E-05	0.322465518	0.235957202	0.002151989	0.211034424	0.17810894	0.030840273	0.236011304	0.116666667
PSMB2	-	Alu	no-conserve	1.01E-05	0.458953588	0.255122016	1.12E-25	0.488167048	0.316443766	0.097587543	0.539545649	0.353877798	3.41E-18	0.549088955	0.282684411	4.38E-06	0.328151317	0.4226526	3.45E-06	0.525569743	0.458404878	0.009638691	0.379960246	0.421671942	0.000906281	0.700492975	0.804738725	5.59E-05	0.532143266	0.443341464	0.332380036	0.468033717	0.431124499	0.561903985	0.347429979	0.350366431	0.009571264	0.573551149	0.481300816	1.68E-05	0.41149897	0.344604446	0.036761422	0.450809705	0.276614833
LRRC47	-	no-repetitive	no-conserve	0.000996613	0.035893654	0.012254997	1.32E-33	0.036363595	0.003891037	0.016406598	0.030641138	0.001968504	3.46E-15	0.022815775	0.002537292	0.014535372	0.00301418	0.006148561	4.78E-05	0.009053687	0.004405743	0.842079234	0.005639297	0.005087412	0.001044327	0.030607573	0.014327655	4.09E-19	0.033782152	0.003817662	0.014222337	0.0230811	0.010193096	0.06060083	0.007642919	0.005074258	6.51E-07	0.019955873	0.004099859	0.0004105	0.006597839	0.002806841	0.153821409	0.024981742	0.0078125
CEP104	-	Alu	chimp	0.39486344	0.07549824	0.082086729	0.50328671	0.09747107	0.090162179	0.963466673	0.064870268	0.060298103	0.037489841	0.098866849	0.067219895	0.066129018	0.044189464	0.062016767	0.477011474	0.081889814	0.084841343	0.976223424	0.068121585	0.064551359	0.772507524	0.069229918	0.055384595	0.099850045	0.072983888	0.057807787	0.626388148	0.083501542	0.080041898	0.018141295	0.079888543	0.099936391	0.091835875	0.082768057	0.117658259	0.070701922	0.074193465	0.06051131	0.194487986	0.177936684	0.126117424
CEP104	-	Alu	both	0.037113417	0.119561374	0.081713979	8.46E-11	0.143962526	0.091931896	0.73495459	0.112272694	0.093665768	0.122978319	0.11256336	0.090105371	0.023056047	0.083635553	0.108409288	0.342638372	0.108178187	0.111477641	0.311758141	0.11391699	0.122625672	0.586295613	0.126935072	0.118248258	0.003555573	0.131127131	0.101597916	0.489273373	0.120885678	0.133034386	0.665178121	0.123046628	0.127299038	0.146979557	0.10865374	0.069897015	0.000130461	0.134646929	0.105595855	0.943806744	0.076606915	0.060714286
CEP104	-	Alu	no-conserve	0.015544791	0.067375741	0.127610558	0.043622408	0.087793072	0.075822602	0.634224638	0.060221465	0.067856128	0.002245872	0.063841594	0.041160955	0.015487412	0.050702173	0.068285919	0.023453986	0.079694941	0.06477323	0.091039601	0.058026098	0.068731721	0.986004251	0.081397135	0.079988502	0.209326029	0.071968479	0.063460344	0.700273247	0.07097151	0.072014829	0.205558961	0.085598192	0.092781046	0.33094545	0.050171292	0.075599803	0.000102455	0.080957693	0.05891401	0.437398757	0.037115262	0.045512821
CEP104	-	Alu	no-conserve	0.060112891	0.178890059	0.26489421	0.607433229	0.324013527	0.297691931	0.425470473	0.22583135	0.354248366	0.220709905	0.16215527	0.189628207	3.68E-08	0.208824732	0.443942297	0.447543717	0.366661027	0.421803384	3.86E-06	0.225247969	0.444735491	0.030071007	0.12403037	0.231739177	0.469000863	0.239077899	0.208583286	9.37E-05	0.186506776	0.451529001	0.431556465	0.330059264	0.370220759	0.77372892	0.258769111	0.27119602	0.02748117	0.390976407	0.332593308	0.507096192	0.0513255	0
CEP104	-	Alu	both	0.761936987	0.072067663	0.058817567	0.000264407	0.105084905	0.04812164	0.403888994	0.072806575	0.019607843	0.042019775	0.064197001	0.032247012	5.75E-05	0.046532444	0.087985952	0.412442804	0.101557231	0.105623557	0.022881374	0.054247139	0.071596439	0.707701807	0.061033079	0.076938899	0.602821403	0.088510801	0.088748267	2.61E-05	0.057234587	0.156398771	0.997567163	0.070728191	0.069859351	0.720287581	0.011841533	0.007187257	0.026374728	0.088061931	0.064291697	0.039054654	0.015021772	0.045833333
CEP104	-	Alu	chimp	0.954658573	0.183478367	0.158873136	0.584617654	0.236432556	0.221254246	0.243546534	0.228483109	0.098039216	0.498813373	0.202059963	0.206438633	0.0016788	0.210307108	0.30279784	0.124949506	0.262067579	0.298815715	0.01174222	0.205234636	0.287476229	0.646524477	0.145142899	0.122789529	0.634619948	0.221096573	0.226903614	0.001252269	0.151250265	0.285576824	0.698930936	0.267502824	0.282126173	0.854101534	0.031906001	0.031487956	0.138405809	0.267118075	0.238154119	0.296781657	0.090484399	0.176923077
CEP104	-	Alu	both	0.080284826	0.131813989	0.176413077	0.258820539	0.14459269	0.12198257	0.909701929	0.136536539	0.115575397	0.622946516	0.130737181	0.120515424	0.018563297	0.136409095	0.188855025	0.66441395	0.159814945	0.165714408	0.018562556	0.130842683	0.175593245	0.525365812	0.076354503	0.103510122	0.472885047	0.149408704	0.153305387	4.31E-05	0.094442281	0.199250754	0.981758936	0.180887464	0.183781572	0.148364747	0.025527701	0.006993007	0.120524764	0.175983117	0.152104729	0.223407006	0.040600125	0.085714286
CEP104	-	Alu	chimp	0.915487183	0.0600538	0.043631659	4.95E-05	0.125634706	0.069180024	0.543839305	0.067630678	0.028985507	0.806799614	0.072950349	0.053084236	7.79E-07	0.036383661	0.116531185	0.08357614	0.14029434	0.116844638	5.88E-05	0.055306032	0.116309376	0.257407139	0.071315066	0.111561272	0.376078282	0.088961051	0.092273872	0.041180067	0.08342502	0.110967358	0.084140487	0.067688872	0.083714443	0.903614422	0.043225015	0.032163371	0.996543985	0.079559787	0.071227854	0.747648806	0.021020557	0.016666667
CEP104	-	Alu	chimp	0.431806796	0.038938778	0.020185875	6.23E-06	0.062609663	0.030003903	0.098704627	0.044764783	0	0.001327718	0.051560812	0.022431736	0.228897636	0.021003701	0.029084973	0.038348449	0.066033117	0.044823103	0.001458853	0.027246008	0.041345289	0.002082896	0.061762713	0.105511963	0.259735076	0.051926887	0.040212422	0.024612755	0.043068838	0.059181641	0.68416575	0.028844647	0.028926022	0.535805658	0.035725399	0.025185559	0.023541974	0.040570349	0.025863091	0.554014244	0.01574182	0.017857143
CEP104	-	Alu	chimp	0.017121749	0.741915698	0.718202903	4.88E-15	0.88204803	0.848271504	0.16694695	0.740966487	0.563826854	0.043797656	0.737271261	0.779236277	4.81E-05	0.802809678	0.930088904	0.156549758	0.888034996	0.905731737	0.013343173	0.741763394	0.913102721	0.003569065	0.617244132	0.784115122	0.019260159	0.805967856	0.848344789	0.857232711	0.809846931	0.909554902	0.36651721	0.864734293	0.920891406	0.227334127	0.491156586	0.440501286	0.000313227	0.88536846	0.850919814	0.769385133	0.432106567	0.646428572
CEP104	-	no-repetitive	no-conserve	0.026805814	0.060590108	0.015506046	1.89E-12	0.062776444	0.015911841	0.118280765	0.051305033	0	0.001413541	0.038058404	0.009338871	0.000636199	0.020300822	0.041483101	0.000204379	0.057926348	0.024818215	0.173585669	0.027100222	0.027164975	0.257122544	0.054945161	0.03336725	1.90E-07	0.067850199	0.0130493	0.192775387	0.053735198	0.023014394	0.047706453	0.03231806	0.043300946	7.81E-05	0.04286861	0.003630123	2.76E-07	0.042797208	0.01085828	0.718706907	0.017109127	0.010869565
INPP5B	-	Alu	no-conserve	0.133705454	0.152538533	0.116059826	1.45E-09	0.172788965	0.110698881	0.07966462	0.163656962	0.076375782	4.76E-05	0.162395921	0.097325941	1.61E-05	0.084121659	0.170448684	0.342172826	0.158219572	0.167731486	0.006401856	0.098143333	0.135308828	0.633563014	0.176591859	0.165049531	8.15E-05	0.157644723	0.111830413	0.438477248	0.152342623	0.135890742	0.569875535	0.12658491	0.139459102	0.021850684	0.116071826	0.073693117	0.670375961	0.14408078	0.137338666	0.133076604	0.135428022	0.061808562
INPP5B	-	Alu	no-conserve	0.607071007	0.019763802	0.02444019	1.99E-08	0.025970482	0.007676308	0.143064643	0.019988509	0.003144654	0.004970883	0.018557529	0.007023339	0.023118025	0.00593551	0.016016146	0.001002186	0.017899815	0.010010843	0.577396379	0.013438592	0.013302636	0.365907285	0.041402334	0.040337626	0.043776199	0.023220591	0.015142461	0.146802401	0.017014634	0.022792183	0.976897498	0.011349377	0.011100603	0.204372166	0.01376126	0.005772613	0.035546911	0.015180934	0.009091948	0.239150218	0.015122775	0
INPP5B	-	Alu	no-conserve	0.000299939	0.020508534	0.056069429	0.063981961	0.030513622	0.022495032	0.779837212	0.022510486	0.022416726	0.414581028	0.019236324	0.017332186	0.165349235	0.016375364	0.025945377	0.106490523	0.029817612	0.028367148	0.233133631	0.01831806	0.023192078	0.791064631	0.038987399	0.034532607	0.534220773	0.026135094	0.026889704	0.12228842	0.026103922	0.03158075	0.215109201	0.022446041	0.026123786	0.289152075	0.016309373	0.024372477	0.363642666	0.024165421	0.020291173	0.423148561	0.023581846	0.040476191
INPP5B	-	Alu	no-conserve	0.198976628	0.032247227	0.022799711	1.59E-07	0.042721112	0.021242185	0.108607373	0.039206895	0.014745045	0.002388522	0.039294738	0.020765001	0.515600826	0.019597686	0.020213129	0.757272591	0.034477573	0.035286418	0.283440039	0.028553042	0.031289027	0.168629144	0.048473639	0.055708372	0.300756817	0.036362815	0.02981108	0.537307898	0.035911992	0.03495482	0.369458197	0.028023899	0.029148487	0.080819459	0.027788441	0.017709748	0.440576396	0.031414383	0.028335439	0.555176127	0.034251496	0.020833333
INPP5B	-	Alu	no-conserve	0.172091205	0.047658043	0.038022952	0.000245508	0.057019014	0.038216494	0.59573774	0.05125956	0.03858418	0.013092755	0.045552176	0.028953831	0.104180913	0.034615327	0.044560201	0.699356974	0.050080665	0.047478556	0.918778338	0.042509197	0.040615544	0.30850362	0.066299496	0.079098588	0.040257669	0.053912679	0.041215674	0.706917191	0.048924343	0.040681396	0.35882655	0.041834225	0.042819873	0.002712539	0.037498622	0.011064428	0.820859358	0.049585577	0.04919634	0.874214991	0.038905707	0.048878205
INPP5B	-	Alu	no-conserve	0.00105576	0.070409465	0.036604167	0.001585515	0.081870183	0.062875455	0.634931928	0.072499444	0.063055565	0.001793523	0.072029487	0.043338072	0.875041813	0.0669778	0.063294434	0.712316812	0.072386856	0.079206235	0.051462361	0.064494237	0.07690149	0.093607758	0.090204855	0.108471131	0.082675334	0.077283278	0.065308225	0.509295149	0.073931222	0.065501819	0.624804526	0.067624014	0.069294241	0.103734767	0.058262219	0.043832495	0.180017813	0.072141879	0.079505686	0.397856095	0.051890932	0.062185355
INPP5B	-	Alu	no-conserve	0.780034151	0.303996116	0.314073902	1.90E-15	0.304758899	0.222835545	0.851753438	0.287303963	0.294043135	8.12E-06	0.265194408	0.190632468	0.001522404	0.242091327	0.298159242	0.447462815	0.296800624	0.289687751	0.233621676	0.255998291	0.264935038	0.538902833	0.319337577	0.311980562	7.45E-07	0.283382839	0.220362759	0.135060491	0.293963493	0.257448099	0.689811282	0.319467472	0.323043904	0.090980634	0.197193689	0.15238173	7.22E-14	0.301619322	0.220149995	0.407848522	0.267866586	0.34375
INPP5B	-	Alu	no-conserve	0.675170247	0.019072215	0.015939042	0.004902717	0.026637821	0.021577691	0.359062126	0.023455837	0.013686764	0.053551017	0.023237082	0.015798868	0.658706899	0.016321147	0.014576079	0.29052923	0.018187718	0.016786171	0.749916804	0.015540402	0.014391978	0.08886084	0.024658916	0.016012554	0.989651662	0.023415393	0.020012495	0.855782495	0.023905275	0.021464152	0.798742528	0.02224004	0.018769158	0.569373091	0.016616934	0.018158861	0.017333093	0.025355467	0.019928454	0.644641564	0.019823007	0.010869565
INPP5B	-	Alu	no-conserve	0.041961693	0.100703421	0.147442359	0.617465387	0.122931496	0.118545878	0.689878485	0.105770981	0.114662275	0.021789455	0.108393245	0.086366551	0.00018626	0.076517833	0.12166432	0.062082797	0.116353459	0.103177947	0.389776524	0.094806352	0.099472867	0.796377326	0.124233655	0.117085034	0.353426988	0.108361107	0.100512346	0.709359975	0.109160437	0.100507027	0.821182161	0.120859093	0.120340319	0.991850143	0.077461317	0.08830917	6.47E-05	0.11805151	0.094313401	0.479702202	0.082667623	0.146834478
INPP5B	-	Alu	no-conserve	0.699808197	0.088052744	0.088039068	4.08E-15	0.113467884	0.062143923	0.327154172	0.087174233	0.112429815	4.85E-05	0.072584063	0.041917369	0.226429899	0.064452138	0.076369024	0.029424202	0.094665081	0.079640919	0.039083847	0.055073686	0.069654711	0.912931941	0.138639417	0.141785181	2.41E-07	0.108342899	0.066284201	0.593148608	0.08269356	0.084192054	0.332332807	0.075580351	0.080408436	0.092261973	0.073763179	0.047392016	1.90E-10	0.084038441	0.046815562	0.098358289	0.084254033	0.135663616
INPP5B	-	Alu	no-conserve	0.02878121	0.087969154	0.057892874	5.68E-12	0.117539022	0.066611083	0.241276049	0.110541329	0.062972063	0.000414255	0.096369037	0.056761655	7.66E-05	0.057999446	0.111620013	0.206427586	0.088980979	0.078797708	0.009585961	0.071028272	0.095129313	0.33852169	0.131818515	0.139308245	0.00012656	0.104621346	0.070968497	0.045346474	0.093127263	0.068753749	0.311633231	0.078445779	0.082464771	0.000998667	0.08786284	0.042450144	0.000111104	0.088616218	0.062285737	0.170264103	0.110319962	0.053894928
INPP5B	-	Alu	no-conserve	0.255748003	0.03542382	0.024470387	1.49E-06	0.032583075	0.013038416	0.712866205	0.029289402	0.029310166	0.007612559	0.020462445	0.009069636	0.803558025	0.020876182	0.013749058	0.004639788	0.030798189	0.019495095	0.300229054	0.022825723	0.028094401	0.236153351	0.03828339	0.026660553	0.000232643	0.02914122	0.012189078	0.453131187	0.024140976	0.013044324	0.93967111	0.027615838	0.02250941	0.22300823	0.023171994	0.014707372	4.32E-07	0.029996737	0.012918384	0.758664939	0.027887154	0.020833333
INPP5B	-	Alu	no-conserve	0.042677843	0.095695835	0.05853216	5.10E-17	0.118971772	0.053870758	0.693593117	0.104891807	0.088672439	7.07E-07	0.087157317	0.033819577	8.98E-05	0.037049806	0.085380491	0.597296603	0.095881088	0.093003241	0.155645642	0.066376145	0.083291025	0.486587994	0.12389039	0.129528555	0.00197944	0.104557096	0.072740585	0.478073875	0.090744368	0.084152046	0.126611089	0.077782343	0.091450314	0.044801568	0.071828274	0.041838804	5.38E-09	0.083344625	0.043701571	0.581956077	0.06676312	0.105978261
INPP5B	-	Alu	no-conserve	0.58373615	0.077445312	0.089730773	3.01E-05	0.095166497	0.060382209	0.226190288	0.074995002	0.108015873	0.000344036	0.07798654	0.034651816	0.017434222	0.03220307	0.056357736	0.029153749	0.069856024	0.053030395	0.860459739	0.048657455	0.046265984	0.460851391	0.087967768	0.072985255	0.147730422	0.081072789	0.064127021	0.104718775	0.070416798	0.089223129	0.206330392	0.054981671	0.060717052	0.289456783	0.089450718	0.080757136	0.148907118	0.064491718	0.05255793	0.363831378	0.065977618	0.073504319
INPP5B	-	Alu	no-conserve	0.225027189	0.055261346	0.039171319	1.73E-08	0.068019246	0.033193846	0.493796108	0.062426793	0.068512429	0.000128946	0.053216178	0.019875118	0.01452355	0.028404265	0.04992732	0.747301931	0.048569116	0.053254703	0.572621279	0.035877917	0.037722606	0.788578293	0.067141991	0.064221275	0.459313673	0.059962674	0.050513601	0.588649879	0.058184601	0.0464632	0.374922624	0.039947365	0.04197522	0.073812858	0.054971963	0.037071448	0.002725152	0.044217826	0.028283525	0.634642682	0.047851004	0.022773279
INPP5B	-	Alu	no-conserve	0.201204743	0.144056536	0.127639812	2.96E-15	0.178607942	0.107525637	0.189101482	0.147662339	0.095261111	0.000112006	0.139731625	0.087784696	0.077458683	0.131092945	0.159266145	0.576166799	0.148866741	0.14685025	0.004787455	0.130717339	0.175504769	0.040196343	0.217426879	0.253068733	0.000215971	0.171996746	0.134744518	0.951688431	0.133836788	0.129381992	0.75813173	0.131166969	0.124389767	0.477451082	0.121926286	0.106364829	0.739276541	0.147595239	0.143788449	0.80891416	0.09596624	0.093146772
INPP5B	-	Alu	no-conserve	0.498776022	0.094637541	0.102715455	0.008910899	0.096664377	0.076162735	0.175683282	0.085958935	0.047893972	0.001657745	0.076868076	0.046047206	0.228573621	0.080156817	0.089462957	0.019936991	0.098829338	0.076108974	0.007571485	0.080408064	0.122427057	0.007344029	0.104541125	0.143384933	0.008624043	0.107445113	0.08359244	0.376472724	0.087286585	0.070593145	0.007288038	0.082943799	0.105408063	0.348515883	0.071573512	0.055908461	0.092135179	0.107454525	0.09338267	0.174627395	0.048126959	0.125
INPP5B	-	Alu	chimp	0.425165949	0.039387761	0.039969906	3.01E-08	0.060391929	0.025775623	0.353879288	0.04583252	0.020283666	0.014710583	0.038314584	0.021102799	0.059391836	0.02754854	0.042977959	0.03455514	0.045841094	0.034722819	0.801928839	0.033129302	0.034490398	0.303683448	0.068848149	0.073167499	7.54E-08	0.056567337	0.021248979	0.994067054	0.04740227	0.039283633	0.029358001	0.031330271	0.042628975	0.638256946	0.032897411	0.040119184	0.001465738	0.044364325	0.027133261	0.022659131	0.0299916	0.09775641
INPP5B	-	Alu	chimp	3.57E-07	0.017554289	0.102693018	0.001403	0.016946976	0.02314151	0.016400884	0.014287233	0.037922862	0.159320199	0.013966648	0.010591591	0.001140907	0.014885697	0.029081434	0.408966057	0.027499658	0.025185218	0.218627571	0.017665577	0.022554597	0.662113161	0.016554217	0.016539117	0.003820842	0.021061449	0.027262196	0.048306783	0.015658555	0.023968863	0.313949901	0.025872582	0.027718814	0.008007433	0.011448645	0.038161221	0.087469827	0.018455599	0.016632365	0.010594491	0.011044812	0.067873303
INPP5B	-	Alu	chimp	0.152447206	0.11464419	0.153182113	0.038423078	0.161018664	0.140027636	0.272922037	0.137942001	0.205098344	0.003378259	0.132686914	0.088125322	0.07274832	0.123812715	0.159644402	0.224570294	0.15669658	0.150443904	0.477560569	0.125791928	0.130918654	0.186014946	0.13414585	0.163584114	0.208409294	0.139803672	0.123648193	0.534809974	0.147127486	0.149709958	0.004811596	0.116377776	0.151999459	0.606845704	0.153703113	0.142524282	0.191539213	0.165896324	0.154550364	0.160573155	0.055402176	0.182291667
INPP5B	-	Alu	no-conserve	0.609174692	0.04882826	0.035945054	5.40E-07	0.072569282	0.039940159	0.335894787	0.063115862	0.035444046	0.116051904	0.058410072	0.042994411	0.267270472	0.030584718	0.041801521	0.200974419	0.051905681	0.044817573	0.006084943	0.034073974	0.051081075	0.215531767	0.055381083	0.06754266	0.760523378	0.056223199	0.048458296	0.561091648	0.055909443	0.051485727	0.247542476	0.033355789	0.033085484	0.076399568	0.077097852	0.050499684	0.004652639	0.047340338	0.030762789	0.316306786	0.031420804	0
INPP5B	-	Alu	chimp	0.485824643	0.157309511	0.144905314	4.43E-08	0.173019639	0.119784054	0.488887806	0.157429663	0.1220423	0.00371363	0.140490289	0.095617842	0.004412615	0.120029765	0.163931994	0.880678058	0.160011554	0.161795613	0.340508957	0.129050699	0.140867958	0.09448096	0.13984783	0.172149288	0.000654162	0.157081247	0.114669843	0.12934649	0.145189707	0.1238906	0.011450598	0.128384331	0.157489011	0.576776999	0.170384773	0.151393482	1.44E-06	0.167004525	0.119421672	0.858864013	0.113976355	0.085227273
INPP5B	-	Alu	chimp	0.470903567	0.035979822	0.044694989	7.17E-08	0.049917372	0.023205557	0.051391999	0.045947551	0.006391437	0.059876105	0.034071171	0.025493857	0.019403234	0.030418603	0.046704805	0.335804356	0.040222219	0.034547315	0.001450221	0.027683027	0.045267456	0.10899377	0.05221819	0.068916781	0.230972748	0.044086567	0.032632035	0.540536507	0.038389633	0.03345326	0.394090119	0.033216381	0.033137417	0.013158471	0.031133025	0.014325464	0.16784622	0.036451849	0.031037266	0.721047009	0.01671476	0.022727273
INPP5B	-	Alu	chimp	0.016335305	0.022537257	0.087164987	3.56E-13	0.023158031	0.060144585	0.030297275	0.006894493	0.071513758	0.090137692	0.012657278	0.020603192	0.001160988	0.021558494	0.04509683	0.121390755	0.045913062	0.034816861	0.024790162	0.033677285	0.046804845	0.719086904	0.013163026	0.009810426	6.94E-05	0.017076936	0.030415169	0.000158692	0.016805208	0.035842166	0.256176405	0.046466892	0.052222858	4.47E-05	0.034319356	0.115709889	0.947009948	0.022463071	0.023167738	1.29E-05	0.009938618	0.176041667
INPP5B	-	Alu	chimp	0.238699025	0.066999992	0.048298977	0.000722116	0.074984758	0.053180977	0.696783642	0.068194631	0.049468278	0.039835883	0.065360446	0.046054657	0.00605298	0.044378214	0.066324541	0.784297434	0.061438052	0.05912376	0.101088103	0.052788012	0.073140841	0.146154504	0.061524594	0.072628262	0.000221205	0.070978121	0.040976754	0.429089762	0.068181877	0.071156776	0.036515702	0.04364111	0.053339317	0.199339524	0.045513567	0.033583547	0.020857049	0.07176996	0.05552574	0.950339036	0.026344886	0.015625
INPP5B	-	Alu	chimp	0.347044699	0.157361034	0.131003633	0.000287114	0.163123378	0.128638284	0.066667243	0.166075457	0.070512821	0.00014193	0.148490012	0.088315088	0.017113154	0.12354263	0.167740804	0.242626863	0.154124967	0.166987187	0.008599418	0.138113023	0.184839245	0.183462574	0.142679646	0.17291575	0.02480616	0.144058502	0.119224536	0.749249686	0.153329795	0.137851528	0.108467942	0.142901802	0.164767379	0.767045589	0.13742536	0.145323438	0.041244535	0.161355588	0.136927543	0.954776109	0.067664447	0.076923077
INPP5B	-	Alu	chimp	0.231941354	0.081042002	0.059641168	0.000141594	0.084054507	0.059020105	0.919443152	0.082050631	0.080994152	0.00027527	0.081715921	0.039317919	0.518739406	0.055767323	0.061114342	0.189514087	0.080990022	0.06690256	0.06492395	0.063964424	0.086270656	0.074580384	0.07109546	0.089839065	0.75580012	0.076590486	0.071050717	0.856932855	0.083637615	0.074803204	0.295968391	0.072042282	0.077078105	0.011163339	0.076952737	0.043699953	0.004926679	0.0851514	0.064174343	0.764384714	0.029875564	0.041666667
INPP5B	-	Alu	chimp	0.677162593	0.257855869	0.235235786	0.023468864	0.296259092	0.266713104	0.975808131	0.30762576	0.307021467	0.059531425	0.263011183	0.211857175	3.47E-06	0.160095835	0.352200154	0.84338073	0.277846317	0.287388073	0.001986726	0.216589349	0.322181911	0.598735886	0.140937071	0.132049459	0.09563263	0.250331426	0.221233124	0.975056553	0.276467578	0.293099194	8.50E-05	0.20785572	0.330175152	0.165105477	0.223977572	0.170785921	2.24E-05	0.328740738	0.254298461	0.294230498	0.10612538	0
INPP5B	-	Alu	chimp	0.555233046	0.312465509	0.274571183	0.09203127	0.335903513	0.317345324	0.769316827	0.396905239	0.344601677	0.001401151	0.345977545	0.230555148	7.96E-06	0.186961548	0.433486872	0.11099453	0.307725067	0.352849475	0.09813145	0.260602987	0.333292841	0.284873121	0.161829317	0.125131313	0.737804978	0.307725211	0.313877083	0.542961839	0.343450907	0.340738888	5.71E-05	0.208020339	0.348339976	0.048976157	0.238610341	0.152140844	0.049637674	0.388645424	0.350627798	0.676336348	0.147634546	0.075
INPP5B	-	Alu	chimp	0.012507717	0.059114682	0.115611114	0.934175547	0.065096355	0.065461168	0.004361368	0.039701028	0.157958302	0.146679791	0.042658768	0.040013857	0.004701724	0.036676919	0.062675434	0.008348091	0.063224487	0.04581614	0.002314455	0.035019087	0.061963801	0.338589539	0.035400142	0.043222663	0.160720719	0.048453767	0.055181321	0.075368555	0.048593426	0.062265389	0.104552137	0.053702851	0.061448886	1	0.038797036	0.046341003	0.007392168	0.066756291	0.049167794	0.370181103	0.01735936	0
IPP	-	Alu	chimp	0.826296253	0.101936339	0.114805854	7.84E-12	0.187032544	0.102991965	0.81255065	0.120052606	0.127428128	0.586245471	0.094780363	0.081169667	1.40E-06	0.080775579	0.186248796	0.427080011	0.142789814	0.14712626	0.001987967	0.094318904	0.154132572	0.001077871	0.103831515	0.04183683	2.76E-06	0.133339599	0.058098355	0.823420709	0.147497396	0.148095108	0.09298693	0.13937155	0.162850669	0.04330831	0.130187619	0.092445108	0.005419181	0.156794717	0.1227551	0.224262528	0.018413388	0.090909091
IPP	-	Alu	both	0.414668395	0.20915521	0.171002024	0.000774748	0.383403035	0.337494776	0.37568508	0.270808908	0.351111111	0.760804212	0.249056361	0.252509461	0.025504548	0.337742001	0.430243818	0.019206173	0.293476611	0.36665753	0.134645444	0.275142082	0.357633483	2.17E-05	0.168680842	0.018683983	1.21E-06	0.248700742	0.091012648	0.037599736	0.35617977	0.270667241	0.400550452	0.354425399	0.396823132	0.244776423	0.320702488	0.265449059	0.022551871	0.423924648	0.382429022	0.89338774	0.093505248	0.090909091
IPP	-	Alu	both	0.078377484	0.07606804	0.036182084	0.519034587	0.156062909	0.14949358	0.304997482	0.090759086	0.16214178	0.965262558	0.092035777	0.083231894	0.009403107	0.096172086	0.148342855	0.088550764	0.136393503	0.156083284	0.000158135	0.102661988	0.174476447	0.00026669	0.076699355	0.019283769	1.18E-05	0.099589732	0.040504449	0.947078582	0.126602199	0.12854172	0.000166151	0.149223674	0.209320951	0.375854563	0.117700895	0.122184386	0.014592653	0.143551018	0.119908416	0.465771542	0.021490794	0.045454546
IPP	-	Alu	both	0.110083643	0.077630471	0.046381104	4.35E-10	0.130463799	0.066846778	0.952973528	0.071344242	0.128205128	0.127906783	0.061971931	0.029746913	6.69E-06	0.039841049	0.10948242	0.443631561	0.08931304	0.090637147	0.000110494	0.055718006	0.110635779	0.003614973	0.060549106	0.026039627	2.89E-05	0.075996788	0.030535424	0.968535229	0.083364641	0.081995988	0.852938813	0.087315457	0.080941681	0.002729022	0.072341821	0.03493232	0.00994562	0.097722706	0.071499594	0.196543961	0.009298913	0.025
IPP	-	Alu	both	0.222649777	0.034368413	0.027434543	1.13E-05	0.045624286	0.02770299	0.430675418	0.032018444	0.011494253	0.017941062	0.034261452	0.016050131	0.000579308	0.018421138	0.039081459	0.579477681	0.047883996	0.045840838	0.001423432	0.021843289	0.040566062	0.517868256	0.038162603	0.045409218	0.004599893	0.034029352	0.022776281	0.322959684	0.040764079	0.026017022	0.065770455	0.029749502	0.036313134	0.113912771	0.029795721	0.021320252	0.780696967	0.03609586	0.031106679	0.005770863	0.008802666	0.045454546
IPP	-	Alu	chimp	0.690989007	0.029657503	0.022590207	0.128952194	0.079809952	0.091398872	0.68446623	0.029635769	0.051282051	0.615768372	0.035164817	0.033734389	6.47E-06	0.026775299	0.094911125	0.004859038	0.063539638	0.083936691	0.000579203	0.034978589	0.071877403	0.020911973	0.028431853	0.008701299	0.000803367	0.046574059	0.012792093	0.406846543	0.061632646	0.081844453	0.007600141	0.059025169	0.083621963	0.600417282	0.081670492	0.094406049	0.816463652	0.057231892	0.052697068	0.650110612	0.005467023	0
IPP	-	Alu	no-conserve	0.090264395	0.024103071	0.001697793	0.7748789	0.066108565	0.063876846	0.669091648	0.02438468	0.027777778	0.324182027	0.031216674	0.032957043	0.001359565	0.03346484	0.074272766	0.005560105	0.051961892	0.069286795	0.345354202	0.026973385	0.031633673	0.272270355	0.015288862	0.009454545	0.002046327	0.02994178	0.00931999	0.984005691	0.051267805	0.050576701	0.000684912	0.037784387	0.074066375	0.947398886	0.087722284	0.102066747	0.903559153	0.053511182	0.051457187	0.14667497	0.008938644	0.038461539
CC2D1B	-	Alu	chimp	0.017962937	0.091838908	0.031419458	5.11E-05	0.082025241	0.113694208	0.544395644	0.10245021	0.237037037	0.023129554	0.049338747	0.012959957	0.098354589	0.073780399	0.107601495	0.092342198	0.137029864	0.102941683	0.982026613	0.138451719	0.135797773	0.000790488	0.105660964	0.043995338	0.217580761	0.093399549	0.06578254	3.74E-05	0.047801243	0.124731182	0.825950602	0.111975894	0.110250269	0.084856363	0.081448317	0.05322767	1.56E-06	0.146723165	0.082536263	0.841730408	0.034428959	0.025
CC2D1B	-	Alu	chimp	0.568356104	0.031299863	0.028460858	4.59E-10	0.032471031	0.080235145	0.165633575	0.042956755	0.212475633	0.03369899	0.019793065	0.004960317	0.427479947	0.035143958	0.046182604	0.37404524	0.062217843	0.048389341	0.392132869	0.05392098	0.047313356	0.002843961	0.038067378	0.012939394	0.259532497	0.03820086	0.051130517	4.59E-07	0.024385747	0.091987	0.30202929	0.052349016	0.072234885	0.193921089	0.033289791	0.034948847	0.003896661	0.056936927	0.0318157	0.47159787	0.012551979	0
CC2D1B	-	Alu	no-conserve	0.268172534	0.105709098	0.08501221	0.004132392	0.081761072	0.098797532	0.959058664	0.115417839	0.140350877	0.174620338	0.050195167	0.027436452	0.153590776	0.082439572	0.13004531	0.42677518	0.122031977	0.108630802	0.946476774	0.128718844	0.129083278	8.06E-05	0.133176335	0.058237096	0.023373515	0.112642444	0.073898961	0.001529927	0.052271157	0.104559817	0.7309241	0.096959041	0.099062043	0.027240492	0.057267936	0.03046583	0.000111348	0.151256427	0.097689813	0.370191809	0.031789682	0
CC2D1B	-	Alu	no-conserve	0.167786982	0.069987427	0.038772672	3.07E-06	0.069804528	0.106592825	0.559480277	0.106435913	0.059210526	0.115710396	0.050881595	0.029013348	0.576828369	0.087912084	0.113576394	0.327788783	0.107033915	0.094723275	0.261542127	0.104656783	0.126757307	1.62E-05	0.101186363	0.035906094	0.764434644	0.085829115	0.079097294	0.005386325	0.054416347	0.087330711	0.826934689	0.077054316	0.07619675	0.022058688	0.050419869	0.013292894	0.002575804	0.137659525	0.103460146	0.725308117	0.027105404	0.025
CC2D1B	-	Alu	no-conserve	0.008728793	0.043405149	0.011756403	0.264361503	0.039562138	0.042990191	0.233128941	0.044144317	0.080515298	0.339451908	0.028937012	0.022362657	0.437930359	0.044685408	0.066875296	0.949361258	0.060160989	0.057510594	0.153583372	0.051242842	0.064831708	0.000704105	0.060722286	0.026678655	0.237052754	0.044437403	0.041809195	0.060270189	0.030901991	0.04834128	0.684052888	0.044320545	0.048123212	0.170562358	0.022796279	0.011069735	0.024973213	0.071363275	0.054572643	0.554433971	0.010239922	0
CC2D1B	-	Alu	no-conserve	0.017521619	0.034560021	0.014415635	0.550010593	0.035953889	0.027383569	0.583841556	0.044408957	0.028985507	0.210416341	0.027933281	0.016833617	0.11534849	0.024232906	0.044820965	0.680624318	0.042835032	0.038566475	0.219664713	0.035093011	0.030696554	0.009299031	0.052413229	0.032599812	0.038676725	0.040115015	0.026860778	0.000132351	0.020388416	0.042567509	0.033161633	0.030939115	0.043553225	0.161201708	0.012745807	0.003607504	0.029382236	0.046819539	0.032535546	0.507084138	0.010531438	0
CC2D1B	-	Alu	no-conserve	0.109394097	0.093329192	0.062555778	0.318849001	0.086175483	0.065322137	0.377343839	0.10881583	0.16005291	0.358240718	0.06762158	0.04542239	0.168737369	0.067910919	0.091363826	0.009520634	0.106577501	0.074695061	0.034666108	0.102992172	0.06882774	3.75E-05	0.131908882	0.05791904	0.006730468	0.106607374	0.072592648	0.108409254	0.057072975	0.066164149	0.04936409	0.077556332	0.096567811	0.03078275	0.041259049	0.014935065	1.32E-07	0.122709645	0.073965372	0.316309028	0.031718733	0
CC2D1B	-	Alu	no-conserve	0.518393756	0.05478552	0.04827708	0.386282868	0.052789501	0.048362988	0.098276459	0.070090961	0.013333333	0.376859269	0.036977412	0.03203328	0.027478228	0.038320664	0.066116504	0.069213641	0.060333111	0.044331864	0.674824791	0.054718933	0.050742753	7.15E-05	0.084081205	0.034991177	0.005017481	0.068123563	0.04304817	0.070265445	0.043902558	0.051092097	0.033178425	0.053252511	0.069161119	0.04599042	0.022436082	0.007083825	7.92E-10	0.079191598	0.035282127	0.391822401	0.017419234	0
CC2D1B	-	Alu	no-conserve	0.871755281	0.108370421	0.108183191	1.04E-08	0.072110539	0.117350714	0.45301302	0.142266081	0.25199362	0.387303507	0.06684318	0.040949395	0.357226499	0.120482121	0.150858586	0.03420507	0.140839965	0.098841259	0.171728203	0.170469765	0.191879585	0.000195505	0.10061587	0.017986014	0.451305281	0.135088297	0.117821514	1.15E-05	0.048514818	0.130548743	0.153887605	0.12356192	0.148997845	0.065621259	0.069289964	0.034621565	4.83E-05	0.19748436	0.134906447	0.364964753	0.040541239	0
CC2D1B	-	Alu	no-conserve	0.871245947	0.120959997	0.110381216	2.80E-07	0.065108044	0.093290744	0.230284198	0.149264352	0.033333333	0.250702485	0.057720281	0.031097626	0.557491723	0.118106136	0.138465084	0.029673829	0.117775344	0.079755674	0.865776317	0.196377346	0.200955519	0.000541078	0.076876839	0.006666667	0.012452267	0.140552747	0.073202855	0.000217056	0.056154616	0.102160092	0.744820984	0.124770052	0.123935324	0.057840888	0.060530179	0.018563255	0.000204353	0.223553734	0.155394664	0.370192529	0.04787397	0
CC2D1B	-	Alu	no-conserve	0.112254889	0.07774651	0.024401914	0.000682131	0.042838271	0.071434217	0.8689823	0.112315994	0.108974359	0.561697334	0.036607496	0.027138734	0.415274131	0.13007678	0.131104188	0.929216903	0.050698697	0.044389059	0.033360732	0.161051139	0.084528716	0.008193336	0.035001304	0.004	0.241972094	0.082545703	0.064068717	2.20E-10	0.025236367	0.132785181	0.44073367	0.087137217	0.077850096	0.089717817	0.074890027	0.022865014	0.192822506	0.173168489	0.144816323	0.478452323	0.048148309	0
CC2D1B	-	Alu	no-conserve	0.12654857	0.022182348	0.004784689	0.470906355	0.015228882	0.018312354	0.75704986	0.034972439	0.051282051	0.953378883	0.007842139	0.013636364	0.124065775	0.031734627	0.05041847	0.244125364	0.021648299	0.011322446	0.380777668	0.052571318	0.03641002	0.050218882	0.016244318	0.002	0.16950959	0.030721264	0.021951037	1.05E-09	0.007699119	0.061635786	0.329419812	0.023710653	0.033900055	0.237160113	0.01570385	0.006060606	0.006771176	0.054551607	0.028751267	0.580527411	0.011785996	0
CC2D1B	-	Alu	no-conserve	0.012344337	0.042564086	0.004784689	9.20E-06	0.017175763	0.038205548	0.939881397	0.045090628	0.055555556	0.329939323	0.021712222	0.009615385	0.667465035	0.04905801	0.037130037	0.978872934	0.025591627	0.017093318	0.847085395	0.07563147	0.061583442	0.039170026	0.015776979	0.004	0.004030707	0.036570806	0.012262146	3.82E-08	0.013209576	0.066477876	0.899093069	0.043548573	0.051542275	0.045618426	0.039229673	0.009090909	0.414206701	0.077831183	0.080193717	0.485417789	0.060689139	0
CC2D1B	-	Alu	no-conserve	0.100712519	0.058237625	0.033906772	0.602083573	0.044642477	0.0429958	0.535390792	0.078348828	0.043478261	0.22158257	0.033129586	0.018395097	0.3429413	0.055921139	0.069452952	0.906097269	0.067423971	0.065622227	0.413049104	0.075222087	0.083224941	0.000164498	0.059411815	0.014871795	0.161587839	0.072258437	0.048677331	0.009201038	0.032253553	0.047116254	0.45605703	0.063605989	0.072325962	0.028444016	0.013031971	0	0.437699731	0.093977139	0.086362551	0.146875243	0.007457716	0.025
CC2D1B	-	Alu	chimp	0.329088155	0.02009505	0.007708666	0.083977643	0.027418419	0.035457636	0.34223812	0.025112783	0	0.6999829	0.018774688	0.015072999	0.195468237	0.019681039	0.033899878	0.00676559	0.027554326	0.047822161	0.238153035	0.035343335	0.044681058	0.014477959	0.015184879	0	0.273592806	0.032821117	0.020053504	0.059664798	0.016187186	0.01772087	0.062823372	0.018337635	0.02965171	0.348516359	0.008937383	0.006060606	0.100057529	0.043267073	0.032610984	0.158703945	0.023368	0
ICMT	-	Alu	chimp	0.003481249	0.504347862	0.382969928	8.62E-25	0.565560301	0.389553491	0.675040421	0.516121644	0.499629218	1.46E-17	0.585903808	0.295342112	3.56E-05	0.348979581	0.463107423	0.529086572	0.492147366	0.509620002	0.737140434	0.46843237	0.477000621	0.143708825	0.447465126	0.493589151	4.28E-08	0.521905344	0.41495476	0.897737773	0.476178411	0.487932912	0.816995163	0.474701545	0.472665954	0.013496631	0.545488381	0.419152496	0.005941787	0.447165197	0.400779775	0.040542365	0.470391406	0.267261905
ICMT	-	Alu	chimp	3.65E-05	0.273325428	0.140919847	7.02E-17	0.302086522	0.193615087	0.678739021	0.288052785	0.32	9.58E-16	0.320838179	0.1390567	4.41E-07	0.158173742	0.270574718	0.01000503	0.260284385	0.287654403	0.001769922	0.243689587	0.30323891	0.541081952	0.252307277	0.279595472	0.00262505	0.282884523	0.230771365	0.398377937	0.258650998	0.24233064	0.216309113	0.243038404	0.254445767	0.000289118	0.319302006	0.183962564	0.004766252	0.223461241	0.190219582	0.028108969	0.261588909	0.095792283
ICMT	-	Alu	chimp	0.002356546	0.114473604	0.062880006	1.64E-11	0.129595583	0.081158589	0.935580535	0.114518949	0.17037037	5.12E-12	0.153514786	0.058822461	3.77E-05	0.050201237	0.095958191	0.186519544	0.102033597	0.109540545	0.347818924	0.095833469	0.107578093	0.674120167	0.121984348	0.136861442	0.006272941	0.124001314	0.091427114	0.066545372	0.105632128	0.072344328	0.466580741	0.091427485	0.095951569	4.64E-06	0.147141817	0.062108398	0.044410468	0.08773912	0.075248531	0.317422877	0.118874994	0.071637427
ICMT	-	Alu	no-conserve	0.259303204	0.025056887	0.017990448	0.004592013	0.028125342	0.020132412	0.039238919	0.02909233	0	0.000280523	0.032014476	0.014779668	0.001314904	0.01014638	0.023231427	0.629550502	0.021273399	0.019411185	0.58610674	0.022997439	0.021910919	0.839702511	0.025711968	0.02993371	0.233447533	0.029849896	0.025250431	0.610660583	0.022233372	0.016456826	0.404074145	0.021761011	0.016510428	0.013536142	0.034846309	0.019756752	0.004937137	0.01971053	0.012058218	0.846555929	0.027575979	0.01877193
ICMT	-	Alu	no-conserve	0.000155887	0.07328073	0.020255763	1.36E-07	0.063376228	0.033061432	0.169885033	0.075594912	0.032142857	8.68E-09	0.099083236	0.033829587	0.010216417	0.033698693	0.059362465	0.630577493	0.04984631	0.050189038	0.016627179	0.045798869	0.064886069	0.342324836	0.056231723	0.048177866	0.000127045	0.064564029	0.0361839	0.686121111	0.049949344	0.035703333	0.513430433	0.05128567	0.052950456	0.000443949	0.068606092	0.018028773	0.469174537	0.048848786	0.043118146	0.421466697	0.044254579	0.020833333
ICMT	-	Alu	no-conserve	0.018454247	0.18142772	0.118028907	3.14E-11	0.172934909	0.103472106	0.09056325	0.183905333	0.075027686	2.14E-11	0.214656561	0.078145255	0.01259138	0.086833135	0.121174894	0.015932809	0.141522848	0.164580871	0.090675826	0.131226184	0.156405224	0.03955113	0.103338014	0.062760867	0.000241151	0.152243811	0.096109498	0.246263139	0.156376882	0.108042257	0.059229772	0.148159119	0.169796113	5.19E-05	0.176215352	0.053824585	0.044388675	0.137550244	0.112771323	0.278810252	0.137070592	0.061904762
ICMT	-	Alu	both	3.24E-05	0.222935158	0.113066235	1.49E-16	0.249761487	0.16213144	0.867611062	0.212816851	0.173715029	8.38E-10	0.23109313	0.120369429	0.002356476	0.124249514	0.17790467	0.486777214	0.216727903	0.211588468	0.013569204	0.175625206	0.219408617	0.844270643	0.175953376	0.178016738	0.008989057	0.22334045	0.183078204	0.989745699	0.239124679	0.229012077	0.59101261	0.204864452	0.210239952	6.37E-06	0.141552014	0.02372578	0.045978976	0.190630976	0.168884493	0.592929643	0.117542613	0.140984016
ICMT	-	Alu	both	0.112003596	0.182915692	0.136623449	1.67E-20	0.233027456	0.13662158	0.350070084	0.166633683	0.115911652	1.07E-10	0.199999734	0.096690564	0.046859385	0.126624615	0.152095157	0.213559035	0.203689558	0.19233362	0.009717283	0.149539078	0.185769239	0.324911658	0.160565621	0.143237763	0.005912609	0.198366798	0.158053522	0.289331146	0.187346262	0.217426936	0.009056261	0.170501428	0.198213022	0.000110342	0.106254195	0.028769924	1.46E-05	0.170457092	0.130663556	0.145135951	0.088759951	0.167424243
ICMT	-	Alu	both	3.53E-05	0.466012105	0.30143993	3.48E-26	0.519488856	0.371203787	0.102784187	0.455283573	0.296227106	1.09E-10	0.504937575	0.329346221	0.000285822	0.30795058	0.402584665	0.886946617	0.450723564	0.463236406	0.538595427	0.414718593	0.444874707	0.38995726	0.358344319	0.382200913	0.000115856	0.457804532	0.386831536	0.447164274	0.443618553	0.481122443	0.576141042	0.437247721	0.447962014	1.44E-06	0.32921207	0.053074866	0.000988265	0.414079922	0.362381222	0.780852008	0.26611241	0.23890747
ICMT	-	Alu	chimp	0.086667891	0.126010836	0.090232377	6.88E-10	0.143835074	0.083453894	0.134718604	0.114659612	0.051353875	9.62E-11	0.128078724	0.041937726	0.012373642	0.04866414	0.078060964	0.25498552	0.103679372	0.106382896	0.008415455	0.083447243	0.113904134	0.246943249	0.076344067	0.09906421	2.90E-05	0.123360893	0.064860959	0.677732139	0.109968012	0.090338338	0.718266062	0.093273475	0.089494135	2.30E-06	0.121645152	0.014202632	0.007940282	0.093708154	0.072631528	0.824254087	0.075342215	0.05795626
ICMT	-	Alu	both	0.101518802	0.097375061	0.112212323	4.69E-05	0.079451984	0.051499989	0.346998437	0.090167309	0.110735877	1.36E-05	0.098261075	0.050212823	0.002915215	0.069787205	0.108550331	0.002452066	0.064388139	0.080423706	0.137692963	0.076456567	0.087868679	0.118341234	0.05674685	0.048824842	0.037588299	0.095715307	0.069276475	0.866644188	0.058514595	0.047809549	0.444226276	0.075194803	0.083990901	1.61E-05	0.103783716	0.024303642	0.072637641	0.082792075	0.066287815	0.492894175	0.081541225	0.11268018
ICMT	-	Alu	both	0.189203044	0.202321857	0.172499937	3.92E-09	0.195348677	0.13994901	0.154308683	0.189112705	0.249705387	1.17E-11	0.242715552	0.121062414	0.000692709	0.119878499	0.173645383	0.704339765	0.16569178	0.1603269	0.766428271	0.162339433	0.156352576	0.073919518	0.131883298	0.108182873	0.066640434	0.187960521	0.160151171	0.976558977	0.182193592	0.174277773	0.180112949	0.17051927	0.182834299	6.16E-05	0.199682787	0.060024487	0.003031211	0.173730632	0.145319282	0.048177423	0.151706333	0.053726708
ICMT	-	Alu	both	0.439764083	0.467945029	0.452254509	9.92E-22	0.505604538	0.383650749	0.613488385	0.426432538	0.483110745	1.61E-10	0.460689428	0.309378615	0.005766727	0.38039005	0.430154973	0.667837933	0.441423109	0.453729037	0.417432809	0.438119007	0.452560648	0.260870422	0.361814218	0.39229903	0.001306106	0.460539787	0.420551714	0.108979586	0.438443457	0.485948098	0.035294129	0.438638775	0.469720897	0.000238985	0.394685514	0.180993457	0.001712771	0.419857499	0.380289624	0.952294504	0.339262055	0.347747748
ICMT	-	Alu	both	0.01190333	0.290992722	0.217880583	9.26E-18	0.317129471	0.221397601	0.863647806	0.267963301	0.263723545	5.63E-10	0.299095141	0.179507958	8.05E-06	0.199355809	0.274074614	0.143831388	0.258830162	0.276152075	0.043253171	0.252595792	0.286116812	0.837389071	0.245173035	0.252062044	2.50E-05	0.294715631	0.230182988	0.7773834	0.267097432	0.265235561	0.13245934	0.257761386	0.277162499	7.25E-05	0.250020474	0.099756594	0.402991705	0.248410691	0.237241178	0.110400664	0.192150455	0.114586466
ICMT	-	Alu	chimp	0.255150107	0.063043375	0.053294604	1.91E-10	0.075106336	0.042885303	0.634856006	0.059116935	0.06529013	9.78E-08	0.059464545	0.027654565	0.004597275	0.028824937	0.042073335	0.000180555	0.068198411	0.048549357	0.010509021	0.046406692	0.058692696	0.033782492	0.073567766	0.105126707	0.021725837	0.077435061	0.059421696	0.589273576	0.060749211	0.058301382	0.065014866	0.046914174	0.053244844	0.01641911	0.069023002	0.045922641	0.304735519	0.047577785	0.042757075	0.874401734	0.041758493	0.036789298
ICMT	-	Alu	no-conserve	0.015531856	0.018772261	0.006711915	2.64E-10	0.025755361	0.009862196	0.770183652	0.021249546	0.014101144	6.64E-05	0.021399321	0.009120551	0.000128841	0.005434032	0.013115725	0.251353599	0.018076866	0.017685077	0.081621761	0.013056821	0.016314073	0.361707189	0.036161801	0.046945717	0.003381443	0.02626289	0.013964511	0.608132327	0.018147159	0.018340736	0.770945212	0.010293959	0.011116851	0.001503846	0.030788458	0.009003229	0.261408103	0.011710211	0.012545538	0.180791264	0.012881877	0
ICMT	-	Alu	chimp	0.007226716	0.029541956	0.012729951	1.58E-10	0.033216001	0.014676474	0.415463968	0.031631135	0.015810524	1.73E-08	0.027138236	0.00756523	0.006766129	0.012005769	0.019072887	0.559711268	0.021668452	0.019828511	0.511903173	0.020184068	0.019736575	0.349180654	0.033501403	0.042308025	0.002716279	0.039483462	0.023916593	0.373882426	0.023649327	0.027165455	0.434150351	0.019973739	0.022772214	0.000307043	0.032258629	0.013230024	0.022143975	0.022877933	0.016761867	0.99271024	0.024983661	0.017119565
ICMT	-	Alu	chimp	0.142320186	0.019508943	0.011954116	1.30E-14	0.035763611	0.014175339	0.424725115	0.023640237	0.015873016	0.001382081	0.015613658	0.0086424	0.041527524	0.011637669	0.017100116	0.406375492	0.020582172	0.016139884	0.267469001	0.013569693	0.012531612	0.475198971	0.029161508	0.027184745	3.44E-07	0.031101734	0.011862911	0.89052563	0.019778862	0.01456296	0.612818808	0.014868535	0.015174846	0.007258088	0.019776506	0.00758556	8.52E-05	0.017264201	0.009318688	0.979079307	0.015739195	0.05
ICMT	-	no-repetitive	no-conserve	0.009489605	0.22142111	0.132611342	8.83E-23	0.252201738	0.124281635	0.883545177	0.190311756	0.18409007	5.37E-15	0.153686341	0.045824717	1.84E-06	0.091110421	0.144372787	9.84E-05	0.193097322	0.147947543	0.024452414	0.123146149	0.146350062	0.776156847	0.228081207	0.241525518	1.48E-11	0.262020242	0.141891972	0.220749657	0.201636791	0.161044283	0.030113289	0.158159383	0.174895036	1.03E-05	0.234768194	0.131430803	9.79E-10	0.15913121	0.09921381	0.075115309	0.167121938	0.061861011
ICMT	-	no-repetitive	no-conserve	0.027355313	0.058267689	0.032921314	7.40E-11	0.055132403	0.02060235	0.593436423	0.03834622	0.019659307	7.72E-08	0.028028211	0.004517485	9.32E-05	0.020217352	0.038228709	0.884946548	0.04260177	0.033408909	0.137035669	0.023890783	0.029331134	0.282245266	0.054600679	0.044515085	1.64E-12	0.05737243	0.013469374	0.074385857	0.041116891	0.015802216	0.550975149	0.035142939	0.035132695	0.003775856	0.029055752	0.015223026	7.35E-08	0.034978756	0.014399056	0.314405889	0.026570361	0.004901961
ICMT	-	Alu	chimp	0.460706325	0.142661892	0.123256134	1.11E-22	0.194610225	0.095707488	0.951668297	0.139304374	0.135449512	4.17E-12	0.143918729	0.055932828	0.003490136	0.072214167	0.10452024	0.053288212	0.138941383	0.121387532	0.001696275	0.087916647	0.116829298	0.247711907	0.153951116	0.170811868	7.93E-08	0.187944829	0.110822158	0.865869997	0.154072069	0.142022857	0.216748919	0.107062285	0.114814236	0.004181563	0.144695249	0.100779226	0.000572307	0.106439963	0.080527524	0.68081651	0.126550745	0.099581281
ICMT	-	Alu	both	0.196487231	0.380617937	0.330931593	1.78E-16	0.466182972	0.348802502	0.012056276	0.339775633	0.615336544	1.07E-15	0.413146831	0.208694723	0.000681451	0.293254228	0.356646912	0.110516805	0.414534558	0.396241309	0.000888287	0.334456284	0.404017814	0.877584755	0.324494099	0.321971177	0.003127777	0.440921688	0.392649809	0.458267292	0.415342982	0.395566344	0.052277268	0.35875368	0.398056425	0.002414485	0.451573866	0.356788447	4.65E-05	0.350809314	0.300489925	0.90687809	0.386864234	0.406985294
ICMT	-	Alu	both	0.039394771	0.118819761	0.078850395	9.91E-16	0.155341188	0.093150268	0.404542083	0.116336606	0.152150263	6.60E-12	0.130914396	0.054281323	0.000776372	0.067728921	0.09491177	0.877917701	0.118252433	0.113724429	0.002063797	0.089838364	0.115230148	0.426109927	0.107449487	0.124430992	0.14312943	0.145561806	0.128924504	0.378169314	0.119970029	0.13686505	0.143579919	0.096639468	0.106700504	0.006441989	0.146778772	0.110018151	0.006481732	0.103519336	0.085383831	0.370836408	0.098677373	0.123065476
ICMT	-	Alu	no-conserve	0.568521922	0.046958377	0.041709343	3.30E-10	0.060920129	0.036645624	0.753832071	0.045974341	0.04682861	1.50E-06	0.055301717	0.027745428	0.003014072	0.028240285	0.041160562	0.803475653	0.054737314	0.051254464	0.072689735	0.036596072	0.042650551	0.002322072	0.050061094	0.07712971	0.006903811	0.055177174	0.037424409	0.729865849	0.052521269	0.052589396	0.136512177	0.036543511	0.044976973	0.31484491	0.065586977	0.058661386	0.051481079	0.037962696	0.030340135	0.917885641	0.047670469	0.035173063
ICMT	-	Alu	no-conserve	0.259265359	0.018214418	0.02147217	0.003983618	0.019511653	0.014116703	1	0.017544344	0.014217342	0.021398574	0.024028178	0.017049285	0.002407462	0.018015425	0.029479987	0.132635379	0.022842724	0.022581035	0.116750846	0.023074442	0.027508025	0.923439867	0.021044132	0.020833733	0.61276004	0.02031397	0.019423763	0.590347044	0.020059708	0.022163224	0.971443461	0.019773453	0.020721598	0.017000677	0.052190021	0.037627881	0.388684523	0.01724975	0.018991635	0.81344569	0.038244423	0.040476191
ICMT	-	Alu	rhesus	0.324954997	0.048191045	0.039650708	0.000310636	0.047722815	0.034586606	0.527438948	0.042192888	0.055982906	0.000403402	0.045167643	0.027921548	0.09112601	0.041173865	0.048032867	0.020608183	0.048338392	0.051580634	0.000738499	0.046197502	0.068016366	0.349752731	0.045119246	0.040031189	0.667669626	0.044060917	0.043096791	0.575905366	0.046806533	0.047925572	0.042104946	0.044065281	0.05279716	0.046690266	0.058977321	0.042465157	0.044809072	0.044580089	0.03639025	0.16385774	0.045112807	0.009259259
ICMT	-	Alu	rhesus	0.804735529	0.033346052	0.032481825	7.50E-05	0.036980032	0.02286222	0.670448454	0.033381356	0.035669192	8.49E-06	0.030073661	0.013510516	0.314717144	0.033450028	0.03442832	0.46427153	0.038115294	0.036075884	0.074385966	0.031852912	0.036501423	0.471983581	0.029397232	0.043156205	0.446085775	0.037113818	0.032906136	0.462053485	0.036625638	0.036879665	0.059009485	0.02840475	0.034336909	0.05095983	0.028513962	0.015897998	0.172227059	0.034959411	0.029661448	0.553688169	0.022496701	0.030080214
ICMT	-	Alu	both	0.074029898	0.293387419	0.241193873	2.78E-23	0.306055045	0.190112287	0.350078889	0.263309506	0.36262933	2.38E-11	0.332453317	0.197107225	0.046861138	0.233596477	0.260688814	0.490359469	0.281591085	0.295601268	0.574532001	0.276898122	0.292948557	0.775567443	0.231773204	0.225839146	0.002513218	0.28558752	0.244195316	0.747988827	0.322385166	0.311514933	0.00729353	0.264250647	0.302076197	0.006634516	0.264979467	0.169869018	0.032722198	0.258427727	0.233887251	0.161029573	0.189668041	0.310606061
ICMT	-	Alu	both	0.169102733	0.346691447	0.300854962	1.28E-21	0.371964212	0.242828329	0.571595052	0.313173843	0.352717653	1.48E-13	0.378458785	0.218883036	0.030726735	0.293225672	0.332697571	0.6034869	0.344305854	0.358830873	0.391480185	0.346418461	0.369764857	0.117204515	0.271649914	0.216102176	1.74E-05	0.352217381	0.28457838	0.668805415	0.38921533	0.401187498	0.002945058	0.318580561	0.362645916	0.001659412	0.308283646	0.181456312	0.039837174	0.31139572	0.282198373	0.837493	0.225812476	0.256439394
ICMT	-	Alu	no-conserve	0.721418464	0.053615231	0.068254827	0.521997322	0.045884648	0.052827711	0.109577517	0.045826512	0	0.008428875	0.054219537	0.023662853	0.481446167	0.058714957	0.066840816	4.90E-07	0.035861273	0.067147531	0.000344914	0.049286583	0.081888661	0.168782183	0.011120838	0.009090909	0.086819277	0.033857361	0.021818529	0.015257517	0.024299576	0.042153092	0.079631598	0.052147059	0.06743412	0.01235927	0.031161546	0.007575758	0.820910795	0.047078226	0.043746751	0.077325851	0.015858649	0.045454546
ICMT	-	Alu	both	0.764498652	0.166119555	0.149698471	0.68545405	0.176631364	0.163045606	0.226764028	0.169069464	0.085144928	0.001741975	0.179292591	0.110460115	0.018357661	0.169242417	0.239703572	3.30E-09	0.126579007	0.240784506	9.39E-05	0.148473623	0.245078974	0.039871383	0.047838493	0.027575758	0.000275378	0.139543527	0.063939437	0.001715379	0.1090692	0.206350051	0.010699815	0.140990959	0.189684763	6.18E-05	0.132737906	0.02004662	0.247058804	0.166488034	0.14423146	0.395199688	0.140261596	0.076086957
ICMT	-	Alu	no-conserve	0.026466493	0.037895282	0.015393598	0.677809937	0.043531279	0.039969416	0.029584903	0.036606417	0.108100233	0.009683741	0.052282729	0.029451455	0.167239623	0.040736258	0.049281165	5.85E-06	0.029811129	0.05934573	2.99E-05	0.037496583	0.079921163	0.062060671	0.013596235	0.003484848	0.000696597	0.036034505	0.012395507	0.152085705	0.034322533	0.044657901	0.417186967	0.037304373	0.045661705	0.000277825	0.04353628	0.002164502	0.965584216	0.044338645	0.044497436	0.42660131	0.041708951	0.0125
ICMT	-	Alu	no-conserve	0.182681443	0.055582075	0.03583464	3.60E-08	0.080691592	0.039217522	0.658639059	0.059386738	0.072494172	1.62E-05	0.072077555	0.029278335	0.003135622	0.02428345	0.041786016	0.790983048	0.048398258	0.047029224	0.00093295	0.030847293	0.054823063	0.767390177	0.024005397	0.02655303	0.137301387	0.068331045	0.049479041	0.042153201	0.05481816	0.076327656	0.067846167	0.041663678	0.053206386	0.004537389	0.057081968	0.030177929	0.865661774	0.048396174	0.046887735	0.475260602	0.02773274	0.040064103
ICMT	-	Alu	no-conserve	0.047849177	0.326455114	0.259957029	1.78E-10	0.35541478	0.253332879	0.915488199	0.330968305	0.340243846	4.28E-11	0.440673703	0.269635867	0.018454895	0.267501546	0.325452946	0.000276114	0.280685388	0.362720598	0.00777071	0.296521115	0.378222064	0.047243471	0.149120112	0.099068422	0.003259197	0.322095532	0.242156772	0.393861099	0.321040712	0.361509646	0.561850441	0.310789947	0.327762205	3.38E-05	0.302730917	0.09774229	0.030245792	0.325813699	0.289728202	0.576914495	0.220429297	0.162337663
ICMT	-	Alu	no-conserve	0.018988816	0.364581632	0.266819296	1.48E-12	0.409802762	0.283546109	0.947616456	0.357667405	0.366788539	8.59E-12	0.464392892	0.247168085	0.000271168	0.271087845	0.37283728	0.000403909	0.317925037	0.409327183	0.002131624	0.330446552	0.432350179	0.044391742	0.177839458	0.123004525	0.002183784	0.368907251	0.272953371	0.452503601	0.348711537	0.3969387	0.280029091	0.350608869	0.376774697	0.000127533	0.331114329	0.130805671	0.326611506	0.341458421	0.318430646	0.975252665	0.213423083	0.206293707
ICMT	-	Alu	no-conserve	0.572504886	0.079365481	0.08928638	0.008590329	0.081832046	0.062837877	0.804157075	0.099045634	0.084320908	3.33E-07	0.105995861	0.047883929	0.000861593	0.065030752	0.10810109	4.85E-08	0.068150219	0.120111768	0.000689904	0.070159498	0.107891762	0.844218261	0.047922568	0.05940984	0.000746518	0.09608587	0.059333258	0.669574962	0.083370538	0.080382393	0.438813739	0.093065682	0.100384876	3.40E-05	0.078710872	0.021419443	0.032756483	0.08450888	0.066152589	0.770749045	0.030832097	0.025
NOL9	-	Alu	chimp	0.758113406	0.047878874	0.044783408	4.70E-06	0.074484062	0.035731492	0.78231275	0.050317495	0.048412698	9.14E-06	0.061696561	0.016134142	0.036754676	0.02652054	0.054163369	0.957520687	0.058250232	0.052464612	0.015936901	0.027770661	0.052958468	0.02653883	0.029180258	0.007636364	0.015830553	0.059516155	0.0336652	0.887785337	0.070164207	0.07581185	0.492555227	0.040113862	0.044277849	0.082832977	0.064230527	0.046330281	0.072625053	0.03686642	0.044240783	0.127856861	0.036298436	0.057983194
SERBP1	-	Alu	both	0.8937466	0.333220195	0.335631996	2.48E-31	0.457579795	0.226653641	0.828057772	0.40907968	0.374867725	2.73E-12	0.361545471	0.156549698	3.80E-09	0.17616369	0.391213377	0.004143088	0.463959718	0.419736761	0.006660853	0.351865373	0.432110363	0.106666677	0.517314984	0.578889362	0.014073124	0.424726953	0.358230438	0.119502842	0.364413925	0.423655938	0.034110342	0.253294854	0.28117682	0.058207065	0.307250911	0.237210974	0.003382637	0.384205472	0.32752177	0.229271748	0.273076565	0.37870648
SERBP1	-	Alu	both	0.132544026	0.38568114	0.315153739	1.66E-33	0.468461637	0.250457533	0.32466387	0.444495572	0.336855971	4.35E-12	0.390251989	0.186545269	1.65E-10	0.159527849	0.41034265	0.010647858	0.474322393	0.437501227	0.074721493	0.382034049	0.435426892	0.380913771	0.533317134	0.560960254	9.08E-05	0.449918341	0.361206942	0.954611875	0.41134049	0.423161392	0.005864003	0.296478463	0.337865412	0.02047661	0.341411391	0.242286066	0.000721956	0.441438701	0.392549608	0.976090492	0.287887627	0.285955897
SERBP1	-	Alu	no-conserve	0.584826481	0.024504151	0.016971047	1.40E-11	0.035139626	0.011855202	0.950846302	0.02930061	0.025455796	0.018241076	0.024815502	0.012207604	0.004610955	0.008051346	0.02185533	0.173660945	0.03170796	0.024452272	0.375468622	0.022124421	0.028577173	0.025793188	0.060927912	0.085104329	0.283865364	0.03068931	0.027551088	0.618504977	0.016889747	0.015738838	0.150238022	0.01143017	0.015689743	0.001261442	0.025450159	0.008180105	0.683216807	0.024265932	0.022911488	0.898206419	0.023959394	0.018016582
SERBP1	-	Alu	both	0.000481234	0.489256153	0.33697321	6.09E-29	0.579330757	0.400079071	0.212189014	0.519627242	0.44801564	3.55E-14	0.492527311	0.286568462	4.92E-10	0.265099981	0.504091857	4.03E-06	0.540587666	0.482847972	0.541565098	0.455200711	0.471641137	0.015358577	0.595365908	0.687187478	6.70E-11	0.561607296	0.424951787	0.091563751	0.512547717	0.458284453	0.041165591	0.407195458	0.442989319	1.04E-06	0.456166815	0.242693648	0.026006073	0.510804244	0.483204152	0.718525771	0.403711725	0.413020833
SERBP1	-	Alu	rhesus	0.265139176	0.081578198	0.060059497	5.66E-21	0.12775291	0.056131152	0.843749058	0.084944684	0.099964101	2.62E-06	0.067495697	0.029724877	9.10E-06	0.034669373	0.083514663	0.030463151	0.085888886	0.067772707	0.229667174	0.065140353	0.06516552	0.871051054	0.131145694	0.124140683	5.91E-06	0.099234117	0.051537599	0.501492887	0.095355459	0.080145485	0.002985534	0.053309486	0.068878069	3.61E-05	0.091847352	0.038267465	5.23E-07	0.102676452	0.064815585	0.743996385	0.092208466	0.089275263
SERBP1	-	Alu	both	0.070344396	0.158993492	0.105967531	9.23E-30	0.217718592	0.085295757	0.061646883	0.187493425	0.078316121	2.67E-09	0.167457779	0.072910638	3.30E-07	0.060880175	0.146656886	0.122492643	0.186653257	0.169937597	0.018714667	0.124883966	0.163425702	7.64E-05	0.307431044	0.442111651	0.001559932	0.190363555	0.136916481	0.642290965	0.158571732	0.157387958	0.857322692	0.093317309	0.091963577	0.001058529	0.19142513	0.108751851	0.030886919	0.137370179	0.112118748	0.134373118	0.147082614	0.05295824
SERBP1	-	Alu	both	0.273149428	0.432940844	0.38225524	2.12E-31	0.526840536	0.316594437	0.371319172	0.482927548	0.395564169	6.25E-12	0.437815124	0.243725361	5.23E-10	0.222947504	0.46812826	0.435705487	0.504274839	0.504117683	0.487963927	0.428699495	0.45352713	0.000153171	0.547642574	0.689698935	4.98E-05	0.503511933	0.41929986	0.861542199	0.440324503	0.441959428	0.01702152	0.346878808	0.383163213	0.00161092	0.466120781	0.317952712	0.000549243	0.481179831	0.417003596	0.753982335	0.367960848	0.333714002
SERBP1	-	Alu	no-conserve	0.020258125	0.017935596	0.005772157	3.21E-09	0.027934085	0.00984963	0.057513913	0.021619623	0	0.010219832	0.019768264	0.010447067	4.63E-05	0.007301848	0.023032774	0.115609707	0.020834512	0.024669235	2.71E-05	0.011647999	0.026567356	0.005982445	0.035934058	0.055560401	0.276363681	0.020944846	0.017258221	0.288701656	0.02008992	0.024822049	0.026553566	0.010675627	0.014531831	7.00E-05	0.022466727	0.004473304	0.775046738	0.016755324	0.015754513	0.426630171	0.016258064	0.020432692
SERBP1	-	Alu	no-conserve	0.012191715	0.022372309	0.004652866	9.62E-16	0.037056138	0.008206499	0.052432596	0.026296394	0	0.005921976	0.028532794	0.014109477	1.49E-05	0.006943507	0.02362194	0.881973087	0.026399997	0.02425361	0.193213677	0.016967534	0.021855676	0.154187436	0.069317309	0.08821173	0.0016058	0.030538077	0.015076478	0.605202571	0.022842732	0.015752569	0.059623639	0.010082458	0.012000455	0.000303511	0.03302493	0.014781595	0.289780224	0.01867717	0.014890686	0.409465281	0.029844924	0.03002451
ZNHIT6	-	Alu	both	0.1231175	0.019403496	0.012757884	1.61E-10	0.043545129	0.024322723	0.457711417	0.02102449	0.011428842	0.07992888	0.023033604	0.016896478	0.249308674	0.022072152	0.02505986	0.00321916	0.030300533	0.038363565	9.62E-07	0.01609828	0.038124768	0.224926206	0.033012173	0.02845643	0.103676743	0.028659465	0.024957176	0.443569679	0.028183439	0.028980009	0.081111945	0.023033841	0.029337364	0.00123498	0.028606296	0.011132697	0.258842361	0.026774601	0.022381916	0.26551311	0.016177408	0
GBP4	-	Alu	no-conserve	0.690474088	0.056870889	0.052632183	0.002294372	0.074239904	0.098447073	0.98781321	0.059903619	0.06199678	0.18324225	0.069766977	0.06144123	0.000566411	0.072478775	0.121377497	4.00E-05	0.107518592	0.137512612	1.01E-10	0.037120563	0.108133243	0.013616552	0.056489528	0.09139689	2.02E-06	0.076193284	0.11233691	0.014625762	0.078319039	0.106398199	0.002860748	0.058899905	0.086209862	0.012321848	0.074595838	0.05193191	0.719043154	0.087612409	0.087332133	0.608888271	0.043458684	0.05
GBP4	-	Alu	no-conserve	0.741480956	0.11783526	0.122706835	0.007203723	0.139624749	0.162275781	0.007449804	0.13305613	0.325980392	3.77E-06	0.110339637	0.056723195	0.000668735	0.177634012	0.261646374	7.68E-07	0.18189578	0.230985016	1.23E-12	0.091326614	0.260411107	0.176574297	0.142570372	0.164375831	3.91E-06	0.144497118	0.192304425	3.14E-05	0.126700169	0.192321145	0.051418101	0.131576232	0.164408541	0.006688506	0.005458208	0.001122334	0.158350969	0.179837393	0.204801791	0.311766685	0.075092614	0.107655503
GBP4	-	Alu	no-conserve	0.180740593	0.296509635	0.240199675	0.725379937	0.356863165	0.374094979	0.409880509	0.335324698	0.406971154	0.000191357	0.305074721	0.222257893	0.192452274	0.346244186	0.400272779	0.000273849	0.393246928	0.435211716	1.12E-09	0.182028061	0.442056351	0.273624642	0.28989247	0.317853127	0.024880791	0.344044826	0.393423041	0.081071395	0.325435023	0.375767053	0.000586284	0.295720518	0.41209965	0.259470024	0.316134367	0.27015517	0.021537173	0.370557846	0.415000246	0.761704478	0.198473868	0.22125
GBP4	-	Alu	no-conserve	0.302346114	0.011622544	0.008292292	0.202323702	0.012933883	0.014539485	0.84148296	0.00835897	0.007843137	0.020481582	0.006301161	0.003082806	2.55E-08	0.010907295	0.041052242	0.211033689	0.022639824	0.026713126	1.33E-07	0.010899198	0.02102078	0.848776425	0.008940081	0.007761001	4.06E-07	0.012866212	0.021238018	0.002950958	0.010293151	0.016457479	0.001428312	0.011560342	0.016380838	0.033848301	0.0106407	0.009521597	0.642000636	0.022396758	0.022205584	0.879138454	0.010353422	0.009259259
GBP4	-	Alu	no-conserve	0.452335915	0.19921248	0.211036302	0.141251663	0.213563123	0.226145601	0.25981807	0.23201629	0.285422602	0.037421488	0.213987044	0.17702476	3.41E-05	0.229484353	0.323475025	5.51E-07	0.23999222	0.283563056	5.00E-06	0.159016939	0.289525901	0.009502271	0.217262311	0.261930271	0.056004081	0.223581909	0.247989584	0.777382619	0.225516517	0.226458193	0.172293477	0.227635296	0.256474166	0.01257467	0.251161171	0.194028017	0.82096365	0.238855936	0.248442642	0.371724642	0.160640137	0.204497273
GBP4	-	Alu	no-conserve	0.285071722	0.144406309	0.115741557	0.040874715	0.178689644	0.20185265	0.071046256	0.146379858	0.257020757	0.000194795	0.137005517	0.098306803	0.000600509	0.169965528	0.267134131	1.41E-05	0.19813389	0.239272258	1.84E-10	0.106176834	0.259533719	0.196312793	0.149189174	0.169225262	6.07E-07	0.167225119	0.217415399	0.000425969	0.157952841	0.217939357	0.066205467	0.150744033	0.18240622	0.002082519	0.180506132	0.124816502	0.002546358	0.200024533	0.246086897	0.341010025	0.111961701	0.158997909
GBP4	-	Alu	no-conserve	0.175340479	0.040802344	0.026582877	1.93E-05	0.049613479	0.075876829	0.604966838	0.045101876	0.037037037	0.528586847	0.039831522	0.040059338	0.002005791	0.03399237	0.06792229	0.038737097	0.065242407	0.07906379	4.07E-09	0.029579476	0.07389906	0.131878696	0.042885981	0.067876267	3.02E-05	0.04804809	0.070775441	0.004739424	0.047688804	0.069199773	0.010049795	0.038260916	0.052887958	0.189146129	0.063344131	0.050469321	0.096463945	0.059076838	0.076482898	0.136795686	0.035138997	0.055746285
GBP4	-	Alu	no-conserve	0.212287996	0.023896277	0.020119287	0.2334546	0.026209586	0.021181258	0.597616504	0.03079978	0.019209508	0.006511075	0.022934777	0.017180933	0.019970701	0.026265338	0.035042419	0.042056854	0.029487425	0.037743692	1.83E-06	0.013465105	0.035352288	0.511006287	0.031771492	0.034497783	0.014309877	0.031691281	0.036992663	0.073933333	0.032986659	0.040297377	0.003486211	0.019263755	0.030519128	0.004538363	0.028899231	0.016527592	0.597160535	0.026603452	0.026985838	0.741858489	0.014445334	0.010869565
GBP4	-	Alu	no-conserve	0.005774555	0.19136302	0.109887557	0.841816884	0.224144491	0.230349596	0.032878689	0.233320945	0.376582278	4.82E-06	0.191608598	0.100591022	1.23E-09	0.153474074	0.335525346	1.02E-11	0.223423571	0.300189122	5.20E-09	0.120855141	0.290481358	0.204420063	0.211745223	0.235907917	0.08793193	0.23252226	0.266205461	0.032528137	0.233414785	0.294675905	0.014340863	0.191392153	0.238147172	0.000862845	0.206758077	0.142896804	0.975746562	0.217020425	0.226159599	0.375837104	0.09399542	0.11759087
GBP4	-	Alu	no-conserve	0.06366118	0.11129284	0.079423036	0.982369452	0.127856721	0.133316412	0.158069582	0.125616178	0.065556343	0.010732004	0.108480736	0.077528978	1.05E-05	0.08722553	0.168404282	0.00957042	0.126710707	0.147634122	7.17E-09	0.065312612	0.16241699	0.506983891	0.123527407	0.138679486	0.029026529	0.125375115	0.148454861	0.015541996	0.132300245	0.168959613	0.015448124	0.099948394	0.123508492	0.004221751	0.115465861	0.086457336	0.795634625	0.116908226	0.118954235	0.409783707	0.067192389	0.077346723
GBP4	-	Alu	no-conserve	0.910185639	0.018940025	0.017770907	0.861557867	0.022761886	0.02092682	0.482364251	0.021550324	0.012658228	0.021078055	0.016799275	0.010878446	0.004522743	0.018113851	0.030384737	0.000360021	0.022751712	0.03192305	6.10E-09	0.009154615	0.024640055	0.640863499	0.023558001	0.019212278	0.001829245	0.022746824	0.029125486	0.00278709	0.019050493	0.030704604	0.157344511	0.016036613	0.017560608	0.000612796	0.024802822	0.012823878	0.113460546	0.019022639	0.022045093	0.249256088	0.013252771	0.023148148
GBP4	-	Alu	no-conserve	0.14986892	0.021717328	0.013273648	0.000372505	0.042404386	0.05766599	0.405229252	0.028147946	0.058526441	0.048488244	0.027268219	0.021577531	0.009284247	0.043218166	0.066036473	0.001245865	0.055563011	0.070978287	1.04E-10	0.019118463	0.058895219	0.170129731	0.0287438	0.04137385	1.90E-08	0.037063527	0.063586887	3.33E-07	0.033391861	0.073195457	0.089862241	0.028109241	0.034381192	0.940910633	0.037100332	0.04258907	0.280233804	0.045702038	0.048871901	0.125146179	0.014387303	0.034632035
GBP4	-	Alu	no-conserve	0.007777223	0.154698891	0.084587465	7.20E-05	0.243643389	0.295658777	0.45228806	0.184464836	0.243366277	0.057253795	0.178927306	0.148596853	0.000126942	0.242463205	0.370180683	8.04E-08	0.298730667	0.361582878	1.32E-13	0.105949169	0.358672687	0.016752699	0.16827316	0.235155165	9.72E-13	0.225774619	0.328752999	1.12E-07	0.223336105	0.359840569	0.063317114	0.172102707	0.207274288	0.688329031	0.22066444	0.235633297	0.004170785	0.252842562	0.306396925	0.00215891	0.091240303	0.343863636
GBP4	-	Alu	no-conserve	0.805227275	0.237632424	0.240380586	4.30E-10	0.397162231	0.497211319	0.635145022	0.218394116	0.211382114	0.041256494	0.2935376	0.247928234	1.15E-05	0.381230233	0.62222703	1.34E-17	0.476495293	0.601065866	1.13E-14	0.149489674	0.549832978	0.316664434	0.236621284	0.280208356	8.91E-12	0.344035373	0.477434941	1.95E-06	0.334764319	0.474622268	0.312525383	0.275015969	0.331145762	0.050440268	0.391583139	0.33251611	0.904627002	0.379965546	0.395929813	0.00877391	0.10989808	0.477272727
GBP4	-	Alu	no-conserve	0.074640055	0.263495498	0.181109927	0.00030147	0.354825682	0.41696678	0.280423561	0.277459061	0.38053613	0.006316783	0.290179282	0.22600941	0.000134072	0.364727308	0.547903204	2.66E-14	0.437469129	0.531642489	3.68E-14	0.152852602	0.487497687	0.312315912	0.237424108	0.273008734	1.87E-07	0.346244205	0.450914065	0.000653606	0.324362271	0.427499266	0.087952519	0.26327494	0.329588718	0.067352608	0.358888616	0.309382647	0.448915563	0.361653809	0.38989498	0.020278716	0.106064187	0.404017857
GBP4	-	Alu	no-conserve	0.242404105	0.071448465	0.049202671	0.322013161	0.108078572	0.09695649	0.656752613	0.085762177	0.068398268	0.000470927	0.088955086	0.050326627	0.000828869	0.087178924	0.151153848	0.000187495	0.119673494	0.144245055	1.41E-15	0.036266909	0.158386603	0.646265945	0.080304258	0.085023588	1.93E-09	0.099043704	0.153943093	0.00823963	0.094523781	0.134051554	0.003558498	0.059209222	0.081825	0.041417673	0.096266043	0.072650648	0.075160144	0.095050846	0.1127753	0.012287655	0.03266318	0.130137845
GBP4	-	Alu	no-conserve	0.303740607	0.055598734	0.040073783	8.58E-20	0.098127976	0.175272857	0.003247126	0.050847079	0.255092593	0.895405319	0.052629633	0.051977148	0.000970943	0.164716322	0.251525597	4.32E-14	0.171339547	0.241669674	1.10E-15	0.058455313	0.230213417	0.253254324	0.06939802	0.082482159	5.69E-13	0.09964002	0.172392272	8.55E-09	0.08245694	0.164545772	0.007531442	0.082946774	0.109427383	0.014596048	0.064651337	0.049013896	0.299170335	0.145992933	0.163831655	0.000529492	0.01759346	0.140376984
GBP4	-	Alu	no-conserve	0.123901987	0.065382052	0.042064479	0.000265687	0.101014873	0.133277897	0.659826015	0.072848722	0.078378378	0.04042554	0.064530691	0.046931745	0.000666755	0.094440317	0.156887231	0.000280913	0.131526156	0.156270151	6.44E-15	0.042279226	0.173397555	0.807266738	0.072942638	0.073943387	1.43E-10	0.091751749	0.149036044	0.000279769	0.095628853	0.14413112	0.003624061	0.06910397	0.089531071	0.052807077	0.067358636	0.048140355	0.082736025	0.118073007	0.142160968	0.137024902	0.028223464	0.082983193
GBP4	-	Alu	no-conserve	0.312581562	0.015570598	0.010946196	0.458732358	0.023762811	0.02375169	0.635228265	0.022597933	0.015151515	0.024074367	0.0205878	0.013711092	0.00093687	0.015643182	0.026281283	0.402499583	0.021729885	0.023542279	1.95E-08	0.009109913	0.028295556	0.671310585	0.020164691	0.017865794	0.0699695	0.026200125	0.02824768	0.284065691	0.026869262	0.016752922	0.024527259	0.019898461	0.026753557	0.062136637	0.024870724	0.019620548	0.887392192	0.018000744	0.016081147	0.345821974	0.007675593	0.033333333
GBP4	-	Alu	no-conserve	0.103811254	0.017174193	0.007087324	0.983649726	0.025249203	0.02436051	0.462807673	0.021655383	0.042839657	0.662514899	0.016483011	0.019709476	1.47E-05	0.012409288	0.035631505	0.316745322	0.0296548	0.035342449	2.25E-14	0.009685777	0.037788047	0.828116365	0.015427566	0.019582132	3.63E-05	0.0224562	0.030889281	0.006077264	0.021397578	0.03357173	0.008516066	0.016182897	0.024567768	0.838424384	0.017787896	0.027652489	0.169765786	0.024275826	0.028532013	0.328224563	0.00746158	0.05
GBP4	-	Alu	no-conserve	0.524622698	0.540075986	0.50576177	0.022590105	0.662665463	0.679105957	0.795479742	0.587393332	0.541033435	0.00557085	0.594107486	0.567401843	0.006048791	0.519274125	0.728486951	0.001825066	0.705134935	0.744802325	2.85E-09	0.290026598	0.714791441	0.376124525	0.433043375	0.494662193	0.00612696	0.641688769	0.661191387	0.010989899	0.673647428	0.666555555	0.009070558	0.483558021	0.667652328	0.049494253	0.694446155	0.612206448	0.907828297	0.606130894	0.638913173	0.006514887	0.239048907	0.727163462
GBP4	-	Alu	no-conserve	0.883011659	0.105115698	0.103526892	0.059725006	0.147582944	0.166829406	0.741025145	0.128476741	0.127272727	0.009074655	0.117840511	0.087053633	0.000117301	0.124857774	0.211901689	0.005543901	0.178350849	0.200185935	1.18E-09	0.067392435	0.186694682	0.442611804	0.108607239	0.122797636	5.16E-05	0.139181848	0.17581567	0.012630605	0.140576464	0.17655469	4.18E-05	0.100860372	0.156518233	0.251947123	0.137538629	0.119934772	0.259009833	0.137246281	0.158579478	0.000837424	0.048507982	0.188411262
GBP4	-	Alu	no-conserve	0.627292296	0.013261123	0.021813634	0.253102106	0.019483881	0.021751868	0.978240145	0.013694061	0.035087719	0.05353727	0.014117085	0.012784153	0.029141947	0.029696707	0.038794496	0.038850146	0.024108426	0.029064359	1.13E-09	0.008857413	0.025146772	0.255937121	0.015160453	0.02136276	1.28E-08	0.017746549	0.031307074	0.00314082	0.021319208	0.034415171	0.166849713	0.013754007	0.014333056	0.005212782	0.012609804	0.00679094	0.213101894	0.022940946	0.027450835	0.020691877	0.007897551	0.027536232
GBP4	-	Alu	no-conserve	0.522831372	0.007908658	0.012279429	0.01100488	0.013776765	0.020646761	0.90266311	0.009243149	0.011111111	0.126459961	0.008203112	0.008154952	0.063886822	0.016116446	0.021434697	1.24E-06	0.014567389	0.025880722	1.77E-08	0.006768785	0.023550387	0.150041223	0.013719235	0.007453251	5.99E-05	0.014224418	0.020210371	0.000535034	0.013421631	0.023009473	0.009034997	0.010979028	0.015588399	0.022348782	0.009061809	0.005419317	0.539790249	0.015937158	0.014709647	0.146677921	0.002658129	0.0125
GBP4	-	Alu	no-conserve	0.810425572	0.132337483	0.145317222	4.34E-05	0.182558082	0.225469157	0.61797767	0.14292224	0.10842803	0.013256712	0.130241475	0.104707744	0.000119541	0.198090013	0.313177187	7.39E-12	0.230558288	0.297437542	6.96E-12	0.089899929	0.277966431	0.006655543	0.140054248	0.201404133	7.09E-05	0.185701887	0.23768232	0.000383684	0.181531981	0.247097017	0.003092825	0.151405296	0.207257745	0.525984415	0.144506256	0.159835578	0.394455459	0.198946175	0.219373945	0.002770251	0.062041674	0.208375398
GBP4	-	Alu	no-conserve	0.145933436	0.025947258	0.016001693	4.56E-06	0.039789907	0.057271889	0.269344629	0.02236579	0.058665008	0.093200826	0.021075471	0.016548127	0.687563869	0.079398759	0.082829987	0.140838476	0.077876136	0.083966557	8.92E-15	0.020683782	0.080625094	0.000972619	0.026438338	0.05184345	1.05E-07	0.03973405	0.061572184	4.76E-05	0.034322673	0.057917541	0.000697379	0.036267179	0.049418814	0.678846865	0.034539448	0.035177769	0.916049502	0.066780521	0.061873077	1.06E-05	0.016187073	0.138515574
GBP4	-	Alu	no-conserve	0.65179743	0.017603904	0.018475044	0.151126554	0.030218901	0.035767996	0.174433148	0.017512529	0.117086835	0.325154069	0.0220973	0.019426261	0.010492057	0.037433063	0.053494315	0.0071445	0.038841766	0.048296089	4.56E-13	0.015006616	0.050681334	0.034002298	0.021289468	0.035542949	0.000157977	0.02963508	0.040449539	0.001486518	0.024748677	0.036136792	0.005315942	0.025773106	0.035831933	0.095264958	0.023149747	0.016121681	0.123374039	0.035037396	0.041883997	0.000254576	0.008901389	0.069444445
GBP4	-	Alu	no-conserve	0.2506995	0.127642112	0.095148224	0.377089944	0.176364487	0.184830232	0.39921975	0.154293403	0.294944644	0.136579916	0.136898152	0.112174396	8.70E-05	0.166540565	0.254908849	2.69E-06	0.210300963	0.258979568	7.62E-15	0.064170029	0.251480754	0.875810731	0.116941191	0.114651461	8.28E-07	0.169274378	0.226334854	0.011694529	0.180695356	0.226155236	0.00392944	0.123631235	0.171827055	0.44169598	0.170223197	0.156953082	0.366947134	0.176658007	0.191770045	0.095242357	0.057736653	0.19504644
GBP4	-	Alu	no-conserve	0.352708078	0.026592588	0.017056606	0.797849775	0.046470361	0.044852925	0.861106109	0.037100502	0.043010753	0.051336655	0.038971327	0.025815456	8.06E-06	0.032871267	0.095087892	0.335612042	0.072247849	0.080926657	5.02E-15	0.016843054	0.080740405	0.716708761	0.030568261	0.032355649	5.53E-05	0.045666578	0.067874692	0.254392959	0.054364395	0.062141278	2.72E-05	0.030717218	0.057927299	0.662898759	0.047731059	0.049059467	0.758410984	0.046818059	0.040805228	0.521199887	0.011939743	0.015625
GBP4	-	Alu	no-conserve	0.26620273	0.024748588	0.014368737	0.024545215	0.045041898	0.056527161	0.086257829	0.035733887	0	0.780093856	0.03957223	0.036077328	0.018998729	0.038193268	0.057098221	0.456398117	0.058105913	0.058534104	2.62E-11	0.014892656	0.066062786	0.450239949	0.021725046	0.029631249	0.001455481	0.040269885	0.054872879	0.164588358	0.052035316	0.06289075	0.000324718	0.025574236	0.039183144	0.29303153	0.04887884	0.064971623	0.463784975	0.042334382	0.034591204	0.639874636	0.015074028	0.013157895
GBP4	-	Alu	no-conserve	0.229619164	0.389406142	0.299596373	0.345533019	0.519038903	0.564125975	0.309880514	0.485876439	0.243589744	0.227508546	0.463508649	0.421490107	5.10E-05	0.328729834	0.663563924	0.078381431	0.625763465	0.677303735	3.30E-14	0.149665664	0.636489635	0.592089132	0.242731945	0.263476312	0.871874705	0.46293451	0.559881815	0.065877484	0.585572337	0.592540052	4.26E-05	0.283447087	0.500198129	0.239366916	0.654050824	0.59481361	0.317712416	0.423646299	0.493595965	0.038329216	0.118716189	0.444444445
GBP4	-	Alu	no-conserve	0.469879507	0.396877902	0.32759692	0.990033213	0.525446273	0.591440163	0.240492288	0.469057328	0.236111111	0.515481819	0.399066566	0.397877081	3.64E-05	0.323669033	0.691551696	1.36E-07	0.689877209	0.784764818	1.44E-12	0.161824974	0.646974224	0.845999492	0.2016837	0.218205067	0.008618845	0.468053835	0.641603317	0.936558742	0.509540079	0.62744469	0.012975276	0.23831737	0.371192333	0.326024803	0.581954126	0.516253768	0.920862143	0.418470398	0.447682967	0.489563439	0.092225588	0.166666667
EVI5	-	Alu	both	0.613580478	0.057357284	0.057939567	0.222419588	0.066038629	0.057518576	0.258229697	0.053407535	0.011549184	0.026278929	0.060594352	0.038598016	0.004796987	0.036002266	0.067121681	0.11191318	0.080496758	0.066804671	0.061709762	0.048102409	0.061380187	0.259045018	0.061805699	0.076815972	0.122880911	0.058083575	0.064921161	0.0974219	0.065052046	0.082159368	0.116858369	0.052831505	0.061960101	0.160048789	0.059655889	0.047510819	0.129828607	0.05291395	0.047005713	0.042461166	0.015998963	0.058333334
COX15	-	Alu	no-conserve	0.053933897	0.019788878	0.040059944	0.019582201	0.026441141	0.01973486	0.567704654	0.018195761	0.009009009	0.24226974	0.014132524	0.010157048	0.477217338	0.028047439	0.022362552	0.208313182	0.024574781	0.026259567	0.991607768	0.020509942	0.018468806	0.016783111	0.02175197	0.011484946	0.941047094	0.020178884	0.021515575	0.255791461	0.018172427	0.024076895	0.261282149	0.025853449	0.03015974	0.233054264	0.033211725	0.043253086	0.598794509	0.021916145	0.019676433	0.712737633	0.02274121	0.014285714
COX15	-	Alu	no-conserve	0.08239503	0.025990003	0.050495057	0.202543984	0.029292501	0.024235614	0.02817753	0.021320272	0.069486215	0.379246434	0.01793722	0.020010054	0.921364996	0.033712607	0.026993651	0.110087676	0.028327128	0.031719774	0.391152553	0.023894751	0.026308708	0.244295699	0.021375368	0.015005341	0.493244003	0.022790565	0.02122596	0.965217102	0.02363271	0.025357747	0.87879194	0.03073967	0.02970076	0.546348208	0.020084844	0.032193325	0.177263192	0.026567698	0.028619365	0.050275229	0.022501646	0.050886614
COX15	-	Alu	no-conserve	0.102016246	0.01580975	0.007788639	0.735646229	0.019624135	0.01891843	0.914383265	0.016613025	0.013888889	0.461470642	0.014012596	0.015223162	0.455810892	0.031005323	0.024319001	0.59252732	0.020001897	0.020644338	0.003934311	0.01457024	0.023645198	0.219848439	0.015858255	0.013068269	0.325835082	0.01549855	0.014308133	0.665949908	0.017581784	0.014848197	0.239238888	0.020366246	0.023557314	0.024350967	0.021037156	0.008815943	0.341933171	0.017772539	0.0168931	0.460165311	0.020096619	0.025287357
COX15	-	Alu	no-conserve	0.817465895	0.022582769	0.030241161	0.270953274	0.024732837	0.026293648	0.344451626	0.02241404	0.007407407	0.075607533	0.016587123	0.025430002	0.316725491	0.040619696	0.029970625	0.201844483	0.023404991	0.025171823	0.039278698	0.020550512	0.028215567	0.795114615	0.020164064	0.017469476	0.307061705	0.021324351	0.018237241	0.125789672	0.022285536	0.028896175	0.536606558	0.028695038	0.026527883	0.179380791	0.025625593	0.023864725	0.581483821	0.02768458	0.028248796	0.429456575	0.029647677	0.045454546
COX15	-	Alu	no-conserve	0.700486793	0.012133101	0.017555623	0.123005135	0.01453947	0.011094223	0.07901151	0.011342068	0.10751773	0.499837403	0.010307512	0.009933381	0.921977309	0.01800552	0.014184918	0.015527597	0.011229337	0.015340343	0.78610088	0.01498267	0.01166996	0.296192757	0.012670324	0.008544645	0.638605368	0.012547582	0.013037634	0.003040947	0.009887952	0.021374371	0.014864264	0.011720851	0.017545237	0.701570691	0.015181077	0.024898969	0.259433602	0.013290152	0.013991982	0.090861118	0.015445361	0.059195402
COX15	-	Alu	no-conserve	0.984402417	0.019909288	0.019552465	0.309397563	0.024843837	0.022400313	0.551022199	0.017863326	0.022727273	0.2505045	0.016092079	0.018567056	5.56E-05	0.047200185	0.023832621	0.462865082	0.022093302	0.021797892	0.054114165	0.020534141	0.025438358	0.088354612	0.017264317	0.014303038	0.192377116	0.022098515	0.016919449	0.264561228	0.019059048	0.022069494	0.476999735	0.02516406	0.023154135	0.077206258	0.027871077	0.020611694	0.300283933	0.022407129	0.025521557	0.802915333	0.026556508	0.0234375
COX15	-	Alu	no-conserve	0.033122911	0.016559066	0.035460009	0.174888951	0.020453191	0.02164418	0.457922078	0.016846419	0.04751462	0.054099199	0.011838079	0.006027281	0.072262576	0.039338416	0.022571072	0.551309234	0.022769152	0.019803395	0.23016289	0.019706435	0.020871447	0.041178212	0.016813687	0.010002612	0.545187319	0.017652955	0.019040182	0.412860238	0.020041156	0.015907293	0.481850437	0.023627507	0.02456409	0.311714312	0.01727132	0.021587101	0.101459443	0.022872287	0.026560705	0.06957427	0.023931187	0.05801678
COX15	-	Alu	no-conserve	0.000182119	0.017649672	0.049246429	0.209875448	0.026328075	0.027787339	0.300208572	0.017376098	0.005128205	0.781281917	0.012637442	0.01318851	0.740398769	0.031476068	0.023922422	0.68492914	0.026355245	0.025224795	0.314879397	0.020997815	0.02095038	0.090774439	0.018761872	0.012770978	0.154510277	0.021697077	0.019763874	0.477451371	0.020389284	0.023727144	0.030034895	0.024309903	0.028633995	0.04725045	0.026970352	0.014141904	0.98598924	0.023490603	0.020733057	0.681829891	0.023976115	0.009259259
CWF19L1	-	Alu	no-conserve	0.00072172	0.080637172	0.040857767	9.77E-08	0.110083593	0.077440854	0.384963417	0.085679646	0.111304348	0.336938228	0.079780497	0.069710284	0.932496655	0.094146976	0.09039359	0.354406822	0.090532929	0.101494915	0.302996965	0.08345134	0.094012438	0.165150123	0.108283895	0.09421341	0.015570916	0.093805278	0.076678134	0.855748646	0.088207682	0.082702131	0.145900831	0.081085866	0.095925418	0.164342713	0.106300844	0.083600851	0.43689478	0.101766581	0.110645113	0.011574784	0.079258408	0.01862069
CWF19L1	-	Alu	no-conserve	0.080835172	0.108969452	0.097266832	0.001254414	0.123106168	0.09434457	0.656695967	0.10646683	0.12685655	0.000920112	0.105650968	0.064106385	0.000112646	0.065595075	0.118988232	0.20616719	0.127017939	0.11603527	0.030012165	0.088000957	0.11841876	0.046641064	0.126350312	0.10222092	0.244979975	0.117294117	0.097249083	0.841380116	0.117071382	0.113513655	0.231782544	0.091310261	0.104222147	0.137646421	0.132176006	0.134236142	0.015809629	0.105472253	0.081753732	0.053052132	0.086712876	0.17099359
CWF19L1	-	Alu	no-conserve	0.188641651	0.981036664	0.828117717	2.11E-06	0.964898572	0.952218512	0.182204228	0.982708206	0.971637427	1.86E-07	0.970576117	0.938763318	0.93218361	0.908579927	0.982147285	0.952908036	0.951038111	0.940451212	0.675135033	0.916456972	0.97954945	0.007125006	0.856305635	0.670415476	0.002506421	0.92243749	0.85326272	0.001294059	0.990124763	0.91318822	0.011754854	0.963526205	0.953604821	0.000698805	0.782407193	0.472582973	1.12E-07	0.97595598	0.953304826	0.013136046	0.76458068	0.490625
CWF19L1	-	Alu	no-conserve	0.115855824	0.131576854	0.16484207	1.83E-09	0.196738829	0.146435145	0.025253747	0.136499435	0.221781995	5.75E-09	0.13883749	0.07411831	0.001390947	0.105894647	0.145684295	1.61E-09	0.185256685	0.135283955	0.265340465	0.117525369	0.129079333	0.919014004	0.200322297	0.201717881	0.091211142	0.171353439	0.148547665	0.249697783	0.157395641	0.166000082	0.488672651	0.106154835	0.110057097	0.0203581	0.176494794	0.134787777	7.73E-12	0.152933324	0.09504461	0.48634972	0.189002925	0.226309003
CWF19L1	-	Alu	no-conserve	0.098731826	0.030334312	0.021302053	2.78E-06	0.037429985	0.022991478	0.433425473	0.03161368	0.019276321	1.30E-05	0.032338785	0.015689708	0.006366057	0.017830154	0.030126587	0.024326388	0.031350043	0.023314134	0.723043509	0.022983728	0.023280252	0.709995139	0.054704721	0.055132286	0.012112971	0.038225135	0.026526567	0.517617876	0.030564076	0.027641783	0.216617035	0.019379554	0.01583332	0.003155668	0.035972206	0.016067108	0.076789316	0.026454311	0.020510729	0.547338429	0.033757934	0.02518315
CWF19L1	-	Alu	no-conserve	0.47843918	0.121983301	0.115710141	3.46E-13	0.139936431	0.084753955	0.212196846	0.11428176	0.144941714	1.59E-11	0.09090038	0.035322463	0.939752102	0.095179783	0.088831246	1.28E-08	0.128336218	0.079851653	0.226090992	0.090494085	0.072165604	0.16332679	0.167626076	0.137880692	0.0023515	0.137432196	0.102587194	0.391253438	0.11860725	0.096611747	0.173371311	0.085702547	0.095293038	0.009120705	0.098744525	0.062826674	2.31E-13	0.116569686	0.063106967	0.37936544	0.112836727	0.13126294
CWF19L1	-	Alu	no-conserve	3.01E-05	0.044645917	0.014858847	3.04E-05	0.05937159	0.042492568	0.1415735	0.04559276	0.020707071	0.00019259	0.043759989	0.023404123	0.148004163	0.029449383	0.038179153	0.008486008	0.047449389	0.036632052	0.030286793	0.032088981	0.04579066	0.652875141	0.072939319	0.071510298	0.000160106	0.061123555	0.037385498	0.012788404	0.047551257	0.028645888	0.010890228	0.028271295	0.039090986	0.013855311	0.041488681	0.029071146	0.000431627	0.045489569	0.030323536	0.577249768	0.045428846	0.060274327
CWF19L1	-	Alu	no-conserve	0.204049849	0.032143746	0.022043094	2.44E-06	0.03883239	0.02005025	0.967593467	0.034506914	0.032029284	0.000183576	0.030990015	0.012951498	0.000639695	0.010175668	0.027063058	0.225281702	0.028574216	0.023179049	0.004830859	0.019398084	0.030278085	0.000149308	0.043046509	0.023219556	0.093238727	0.036457696	0.028749495	0.740597323	0.032707864	0.026936508	0.503357224	0.019476735	0.021977612	0.005515563	0.021043446	0.008076645	0.007122415	0.027973368	0.017235713	0.946317217	0.021827418	0.020833333
CWF19L1	-	Alu	no-conserve	0.156203443	0.048332407	0.062935351	0.000472296	0.058558391	0.046803033	0.201247494	0.043101907	0.05891688	0.004617786	0.040685136	0.026591323	0.231018442	0.030023575	0.03671005	0.604521636	0.04307921	0.039751817	0.010449022	0.034986283	0.048393728	0.43665894	0.053077784	0.051927229	0.010970586	0.051207081	0.039160137	0.054114732	0.053104386	0.037751352	0.212610155	0.041686257	0.047633587	0.006552391	0.036633128	0.022379526	0.00034194	0.057275502	0.039723458	0.115252216	0.039281893	0.00862069
CWF19L1	-	Alu	no-conserve	0.945547085	0.29052165	0.279829825	2.73E-19	0.337071456	0.213497536	0.708580342	0.33696497	0.296054935	3.80E-12	0.367056449	0.194760205	0.000775958	0.232559909	0.306706775	0.518496278	0.310480429	0.297375132	1.02E-05	0.238537624	0.323694423	0.289869973	0.450712726	0.470424895	6.26E-05	0.343949394	0.26906334	0.985352759	0.299273516	0.299862274	0.717460724	0.249363443	0.253816427	0.000220994	0.333171562	0.199977287	1.89E-10	0.316524126	0.230775008	0.31427494	0.274474879	0.32921123
CWF19L1	-	Alu	no-conserve	0.013999393	0.341666775	0.47376077	1.18E-15	0.41941538	0.520628159	0.003129508	0.304840827	0.779287613	3.20E-06	0.341743445	0.249962993	6.28E-08	0.316858957	0.491593818	0.41501409	0.496395762	0.485322223	0.011480767	0.41134181	0.475689942	0.700321418	0.45207223	0.445049178	0.072202899	0.367793929	0.395155126	0.000373781	0.315794412	0.41302163	0.78078761	0.538076476	0.541109317	0.749515146	0.312418575	0.341658259	3.71E-08	0.394907821	0.310924619	0.08317524	0.289680674	0.626290323
CWF19L1	-	Alu	no-conserve	0.008352994	0.044776616	0.137752664	0.313997529	0.070315715	0.068073041	0.110377216	0.043558953	0.069082958	0.022925922	0.046770797	0.03369045	0.410368589	0.044083334	0.048101786	0.489227656	0.072169231	0.071206886	0.014564685	0.052291007	0.075125112	0.015085998	0.07915785	0.064188605	0.00207154	0.062549378	0.08199237	0.000143276	0.050282392	0.093481002	0.087839012	0.052059067	0.06064577	0.573050913	0.051460981	0.0672166	0.326590832	0.057823749	0.054111516	0.022826578	0.048962605	0.124300468
CWF19L1	-	Alu	no-conserve	0.512974248	0.077809853	0.068584434	0.113255838	0.081470641	0.072744514	0.081408257	0.07898103	0.1230896	0.001566469	0.078497278	0.055868394	0.277669967	0.065918404	0.078588992	0.596414968	0.075001804	0.073821589	0.867823128	0.075894233	0.074519931	0.061484147	0.105548931	0.092302526	0.025931153	0.089206409	0.074190609	0.441718162	0.063575598	0.054592618	0.215714486	0.070736831	0.075300629	0.485088225	0.079511767	0.074160552	0.022529681	0.098560427	0.084790145	0.329680846	0.083110758	0.054824562
METTL10	-	Alu	chimp	0.796036441	0.041723064	0.040355358	0.146426522	0.066374192	0.071950309	0.76062778	0.04412747	0.051167133	0.59493131	0.032050024	0.025994899	0.050565627	0.052033397	0.065558553	0.839878819	0.059675608	0.055212547	0.068421261	0.051253404	0.058929423	0.002107714	0.035809193	0.011354847	0.02751968	0.056170541	0.035276492	0.523552605	0.057713003	0.062439573	0.018267151	0.041272916	0.059761787	0.528770858	0.043538265	0.035771868	0.033561221	0.070094815	0.051961694	0.242205469	0.031217338	0.071739131
METTL10	-	Alu	chimp	0.982419804	0.031893844	0.034011636	0.062421609	0.046165314	0.055672082	0.52566637	0.041061281	0.049818841	0.703979487	0.032383464	0.02385695	0.360514764	0.059651879	0.047279002	0.162783414	0.043621396	0.052954524	0.316682081	0.046934994	0.04703337	0.050566218	0.034743784	0.02177622	0.032835439	0.048036645	0.036224309	0.052124092	0.049233888	0.064766866	0.02523086	0.043036986	0.060570945	0.151708033	0.041224464	0.034255332	0.013785395	0.058568509	0.041240676	0.192159136	0.02412404	0.046497585
DCLRE1C	-	Alu	both	0.140304599	0.059717188	0.047713109	0.845256268	0.132488705	0.126737502	0.754192437	0.048919734	0.034188034	0.280053531	0.07757063	0.056211875	8.93E-11	0.02172059	0.160796703	0.646184439	0.11241153	0.113305022	0.809358875	0.065765451	0.072622064	0.000191623	0.032170492	0.002857143	0.000955212	0.076927951	0.041434939	0.335905689	0.080048852	0.062498657	0.014305789	0.072723786	0.112027846	0.015945527	0.159274494	0.111566893	0.036404505	0.090072256	0.116514683	0.158702669	0.033555256	0
DCLRE1C	-	Alu	chimp	0.02262053	0.055012369	0.030590177	0.22824709	0.094520866	0.087451158	0.187436043	0.04658086	0.013333333	0.661264133	0.088645759	0.078089055	0.003732943	0.025501058	0.067485181	0.156938395	0.071516419	0.072018619	0.333610222	0.060533762	0.041292165	0.000352664	0.019804137	0	0.000227292	0.063555875	0.034301917	0.802975147	0.054726191	0.052447917	0.000734811	0.05788696	0.096032742	0.004867713	0.138945045	0.091590681	0.736598551	0.079171919	0.079216843	0.737804362	0.01814818	0.022727273
DCLRE1C	-	Alu	rhesus	0.086161877	0.053963199	0.039042055	0.324353009	0.097186347	0.09048383	0.822055706	0.048657445	0.035555556	0.705843986	0.085487715	0.079119562	0.0011266	0.023812199	0.064933233	0.063989485	0.075617152	0.073200638	0.38331562	0.053816677	0.037165181	0.0001997	0.022343923	0	2.17E-05	0.064708062	0.030498167	0.304475491	0.056550345	0.04220947	0.002837925	0.059619031	0.088527201	0.030159516	0.137564601	0.113118475	0.810145037	0.075709869	0.076947905	0.092015123	0.020509657	0.1
DCLRE1C	-	Alu	no-conserve	0.647487296	0.050016368	0.063745291	0.009683003	0.067663593	0.054046063	0.666095292	0.050233481	0.036786787	0.402115934	0.046375863	0.038766121	0.0007053	0.019543876	0.056882619	0.011874458	0.05649924	0.038142919	0.648602506	0.043933247	0.054946009	0.001135535	0.031853079	0.016333333	0.784973056	0.052681469	0.058401167	0.432473148	0.046308672	0.033017785	0.019361011	0.040214594	0.056594263	0.004684795	0.060185869	0.042399205	0.04369293	0.056357248	0.035315713	0.20514324	0.030246681	0
DCLRE1C	-	Alu	chimp	0.396996976	0.062894095	0.057996067	0.00012208	0.072557665	0.049360675	0.700423095	0.055997195	0.061494253	0.824201664	0.052805064	0.051117962	9.58E-05	0.018262908	0.064212588	0.007357659	0.060461301	0.04196439	0.131422729	0.053032168	0.079041214	0.002748256	0.026536196	0.012833333	0.203736964	0.059361161	0.050687151	0.86924866	0.052478741	0.047715738	0.133479455	0.045404324	0.054412126	0.001109696	0.074275792	0.041983055	0.148165577	0.067045556	0.052395377	0.145987118	0.041537961	0
DCLRE1C	-	Alu	no-conserve	0.083455966	0.047967468	0.030661546	0.139328304	0.049446974	0.045534407	0.016409371	0.046508323	0	0.794345258	0.038288988	0.036826602	0.414013219	0.020717961	0.025262069	0.033361176	0.047661094	0.038111128	0.087736023	0.052527883	0.030430239	0.000303848	0.023382403	0.0025	0.518056825	0.039716843	0.039760018	0.580934215	0.032233629	0.022111982	0.736117439	0.039912107	0.039080291	0.01278436	0.061754732	0.044961375	0.04496485	0.064604443	0.048284163	0.232010795	0.03119629	0
YME1L1	-	Alu	no-conserve	0.727659318	0.008408887	0.014725787	0.746780266	0.00967952	0.010677662	0.877803792	0.00664093	0.006865199	0.155688696	0.008962186	0.006900879	0.150714335	0.007287095	0.008549897	0.466723536	0.00968508	0.010494952	0.71623863	0.007429137	0.008000443	0.51386429	0.008926922	0.008489019	0.91851405	0.008161234	0.008431919	0.979437735	0.010443522	0.010035193	0.134220455	0.007349824	0.008377705	0.405931702	0.012620257	0.016393197	0.183200125	0.007572095	0.006440918	0.626769273	0.011034841	0.014694042
YME1L1	-	Alu	chimp	0.000353672	0.007994432	0.014884309	0.036472449	0.007338035	0.00601055	0.604599312	0.007171235	0.008508693	0.249732552	0.008676743	0.007495742	0.917706559	0.007924839	0.007575331	0.135800721	0.006625902	0.005624758	0.650958206	0.008322733	0.007939831	0.213581549	0.007136013	0.006625102	0.984785408	0.007896418	0.008561164	0.694839981	0.007579082	0.008664823	0.301928049	0.007880377	0.007385973	0.025128856	0.007862063	0.004612229	0.673182621	0.008559527	0.008047712	0.501692922	0.011109999	0.00877193
YME1L1	-	Alu	no-conserve	0.350831071	0.00399361	0.003419295	0.33504725	0.004244346	0.004200701	0.812792281	0.003800996	0.003306088	0.040187605	0.00411829	0.003120573	0.930182358	0.00366901	0.003237509	0.035910411	0.003505236	0.004232845	0.63941014	0.003921779	0.003612122	0.273758351	0.00417128	0.004259157	0.915002143	0.004297486	0.005433068	0.440145395	0.004317656	0.003781255	0.808501563	0.004552205	0.004186857	0.035489997	0.003469864	0.001751207	0.942364086	0.00359669	0.003369975	0.927404014	0.004596145	0.00390625
WAC-AS1	-	Alu	no-conserve	0.088207161	0.05467205	0.045813634	1.41E-07	0.062380507	0.039530258	0.746038931	0.042538629	0.030609307	9.29E-05	0.047109718	0.020637575	0.100493002	0.033941331	0.049651361	0.045942506	0.069093698	0.054837627	0.117553509	0.053749422	0.064853869	0.973816378	0.102314145	0.105536008	0.960618474	0.064865376	0.067106176	0.156370525	0.058075094	0.06806613	0.435417818	0.032580825	0.030105373	0.000503051	0.041826285	0.01582398	0.002264922	0.050415284	0.034738723	0.173304033	0.058976462	0.101933427
WAC-AS1	-	Alu	no-conserve	0.684910395	0.014326338	0.014096673	1.29E-09	0.021320219	0.009712394	0.881982949	0.012814048	0.012507645	0.000508042	0.020786946	0.006723596	0.004846407	0.005727784	0.011319348	0.370702962	0.020602448	0.017490341	0.062005226	0.011088001	0.016240358	0.651802998	0.040984782	0.047857863	0.166654463	0.019121218	0.017587678	0.397115159	0.024834747	0.022161935	0.195341463	0.008821965	0.006429471	0.0047622	0.025848881	0.008630622	0.201279272	0.014587926	0.010967069	0.312711524	0.017712914	0.004464286
WAC-AS1	-	Alu	no-conserve	0.138396618	0.048275737	0.034373809	5.74E-07	0.055327942	0.037817771	0.436096645	0.045169489	0.028183581	0.007088248	0.042444476	0.028472498	0.044006025	0.0376418	0.048384448	0.07258679	0.061555833	0.055310409	0.239435329	0.050792586	0.060754604	0.697874702	0.080058588	0.086175347	0.163992629	0.058690007	0.052297542	0.947290802	0.056901346	0.054625002	0.912883029	0.039907337	0.045417712	0.01722431	0.061651518	0.040758636	0.003823927	0.046888446	0.037011973	0.07532019	0.103329682	0.048232323
WAC-AS1	-	Alu	no-conserve	0.002008403	0.016232959	0.004539371	2.59E-10	0.021061977	0.007121059	0.081607274	0.014481569	0	0.000223131	0.014670065	0.003019798	0.00019023	0.008951559	0.022803523	0.237047905	0.018087873	0.013237246	0.30948765	0.012424959	0.015597622	0.598012284	0.034194747	0.043335872	0.002057447	0.018577913	0.011110059	0.420609461	0.014575436	0.008576711	0.156044461	0.009106511	0.006493804	0.050577717	0.00691764	0.001317523	0.210310999	0.009704388	0.007533914	0.151001214	0.011651258	0
WAC-AS1	-	Alu	no-conserve	0.109844125	0.008911258	0.003804486	5.07E-05	0.012383082	0.006441558	0.185428901	0.008709886	0	0.141702458	0.010229294	0.00846454	0.118479434	0.00960408	0.01134276	0.335112676	0.010319837	0.008708733	0.766120219	0.006979912	0.007261534	0.030000139	0.027183423	0.018654975	0.02922823	0.01103598	0.006962868	0.65756922	0.011103178	0.011337336	0.683639626	0.005059383	0.006909057	0.031992863	0.00861355	0.001044932	0.13011795	0.007532636	0.004600926	0.728464997	0.013111354	0.010416667
WAC-AS1	-	Alu	no-conserve	0.084301048	0.039460563	0.027237593	3.99E-07	0.04863735	0.029798162	0.399860919	0.034095467	0.055016181	2.57E-05	0.035251333	0.015002041	0.02242123	0.027447434	0.038892546	0.033984944	0.052030705	0.041071431	0.464610889	0.040798142	0.033960609	0.347288901	0.062629779	0.077340352	0.317012867	0.047739071	0.043082083	0.432246949	0.044132458	0.034849136	0.44520579	0.032298339	0.035589833	0.009823298	0.038584353	0.014127929	6.72E-06	0.038140066	0.021270883	0.107046131	0.053267993	0.017097083
WAC-AS1	-	Alu	no-conserve	0.110276798	0.012567315	0.010371814	0.000267948	0.01454097	0.00852362	0.127502844	0.010767306	0	0.013960683	0.020698871	0.010347253	0.057796092	0.008014615	0.011013225	0.452843056	0.015431394	0.014993895	0.276345737	0.011014082	0.010276737	0.779615559	0.024223893	0.028476779	4.24E-05	0.014093235	0.004576285	0.530666541	0.015282116	0.014651857	0.507409675	0.006436632	0.005947485	0.01524686	0.021545036	0.00784632	0.374754004	0.008913329	0.00686181	0.316100873	0.036565591	0.018012423
WAC-AS1	-	Alu	no-conserve	0.005281513	0.028540187	0.013118376	1.96E-05	0.030149326	0.019922503	0.467376951	0.026349487	0.011510654	0.007043995	0.045050995	0.024228438	0.304226368	0.022923251	0.023511618	0.333666861	0.033295933	0.028659652	0.192129168	0.026925692	0.034701099	0.074782128	0.053538637	0.046949984	0.748095255	0.0311883	0.031540747	0.410315474	0.030724497	0.031194456	0.600215521	0.01723924	0.014660186	0.000472774	0.030023756	0.007447458	0.717140622	0.021817011	0.020358867	0.92240899	0.038996245	0.035416667
WAC-AS1	-	Alu	no-conserve	0.073034584	0.06224675	0.04506762	4.86E-14	0.065470672	0.037776799	0.113844848	0.053033737	0.023930156	2.84E-07	0.088215429	0.042618758	0.014040756	0.037891467	0.054144297	0.206058234	0.05903036	0.051800963	0.419950272	0.055203442	0.04949636	0.263591107	0.093612339	0.102182554	0.084218888	0.07123497	0.057990571	0.797116497	0.062749543	0.063707424	0.399367619	0.041496314	0.040123193	7.02E-06	0.093066715	0.037385442	0.029354226	0.04338485	0.037399555	0.080266303	0.091436119	0.034184588
WAC-AS1	-	Alu	no-conserve	0.001367581	0.019351478	0.00757258	3.93E-07	0.020414154	0.011805065	0.729071342	0.017453239	0.011167181	1.28E-05	0.041988738	0.01825071	0.013237922	0.011639597	0.017991645	0.30389382	0.016868974	0.016692917	0.497255335	0.016383764	0.014777175	4.28E-06	0.028434312	0.011158035	0.222110952	0.018986904	0.01674485	0.222561354	0.016497362	0.019187035	0.404966216	0.015697923	0.013489467	0.001281226	0.035813612	0.013517456	0.269885515	0.014292361	0.011236146	0.642551582	0.036231031	0.020490298
WAC-AS1	-	Alu	no-conserve	0.060725986	0.024233546	0.016557577	1.47E-06	0.02690824	0.015819096	0.995890867	0.018309879	0.014588992	0.050806761	0.042008366	0.033809215	0.017633603	0.017082822	0.026069388	0.965780975	0.029040635	0.026889324	0.608220323	0.027228599	0.023299327	0.007360424	0.033294935	0.018889378	0.316311603	0.025628119	0.025480631	0.363638633	0.026284118	0.029810212	0.166485539	0.022055275	0.018925721	0.099666295	0.053620098	0.039964182	0.069890637	0.026407232	0.020411046	0.088870069	0.062255854	0.017857143
WAC-AS1	-	Alu	no-conserve	0.004410719	0.037039331	0.017329526	1.06E-14	0.03946679	0.018590837	0.319503938	0.027735736	0.011292114	0.00036003	0.044332282	0.021992601	0.212156961	0.026725967	0.03320507	0.591124986	0.034206799	0.031806909	0.882862999	0.033732029	0.030393414	0.328113425	0.047233715	0.052801402	0.002892463	0.03704871	0.023653372	0.04697352	0.047208925	0.027701248	0.096508614	0.028123258	0.022329274	0.000965658	0.067736842	0.035842016	0.025605879	0.029280663	0.020853645	0.444124551	0.070686706	0.043228905
WAC-AS1	-	Alu	no-conserve	0.402836467	0.011719508	0.008315028	4.13E-07	0.015101483	0.006765695	0.881412771	0.01199546	0.005651705	0.005868147	0.018052952	0.007573081	0.000299356	0.00577837	0.012707153	0.472295319	0.012175582	0.011964715	0.00495925	0.00852892	0.013752145	0.483843038	0.027026739	0.034814289	0.013324309	0.015996778	0.009164886	0.964654745	0.016686216	0.015400665	0.410765995	0.005680133	0.006845876	0.000844538	0.020226854	0.004817405	0.630330194	0.007732843	0.007191206	0.123018617	0.016046458	0.02905433
PBLD	-	Alu	no-conserve	0.690769704	0.016521095	0.011990321	0.192729722	0.04072762	0.033557766	0.384089018	0.009863182	0.024691358	0.01918343	0.00515374	0.016598481	0.163702622	0.026969861	0.025961586	0.726990542	0.026576182	0.025896859	0.023380523	0.023393571	0.027199245	0.148831022	0.033974548	0.036423606	0.006587222	0.020359743	0.014429565	0.482775638	0.011327869	0.020314213	0.192663414	0.033610091	0.042290197	0.825175524	0.016264789	0.012630583	0.210252784	0.028690204	0.022805236	0.289448122	0.007588068	0.017857143
PBLD	-	Alu	both	0.008669513	0.022132267	0.071335877	0.039948058	0.053522455	0.042302002	0.001162118	0.020088395	0.194276094	0.455749218	0.012230264	0.020506894	0.154562526	0.025365853	0.027553199	5.16E-10	0.039442312	0.026090051	0.748007402	0.0272046	0.02524579	0.937234882	0.034148434	0.031901514	0.130915866	0.031487629	0.026410648	0.057869258	0.022307004	0.046407661	0.936703829	0.039141673	0.044266563	0.707697917	0.030237824	0.026591115	0.851301362	0.041064695	0.038990299	0.311794332	0.018042931	0
PBLD	-	Alu	both	0.00125317	0.029837322	0.062769558	0.057423639	0.072667032	0.059438077	0.725774852	0.020665037	0.034482759	0.805669074	0.013368379	0.011815863	0.163705284	0.038856439	0.046550887	0.016024854	0.051246783	0.041925268	0.489641788	0.044025777	0.043541017	0.08739947	0.050178834	0.055837867	0.005948967	0.041879668	0.028094483	0.019601933	0.021244842	0.05256066	0.392706524	0.057563268	0.064778743	0.822902856	0.039869118	0.03491465	0.176622768	0.046970985	0.034893392	0.189643656	0.027944187	0
PBLD	-	Alu	both	3.84E-05	0.032376042	0.114862352	0.61142849	0.069233081	0.067933598	0.97084941	0.023013843	0.022222222	0.306191052	0.025613808	0.019511441	0.939556708	0.065807024	0.062702092	0.092118894	0.066959324	0.059945338	0.92071721	0.067494746	0.061639515	0.000818679	0.053075251	0.063219652	0.00143554	0.037851214	0.022033087	0.000882377	0.036917955	0.093420951	0.05794977	0.072018606	0.095033424	0.80208631	0.062516759	0.068712804	0.840534811	0.049281667	0.051419203	0.343127198	0.052598308	0.114478115
PBLD	-	Alu	no-conserve	0.00509619	0.021186988	0.043111381	0.656775732	0.049544236	0.047660663	0.428568347	0.011670172	0	0.647796821	0.00880468	0.01611241	0.899304846	0.048632168	0.030815301	0.35153019	0.034465569	0.031213046	0.800227396	0.034221661	0.030594266	0.041476027	0.028748867	0.032800997	2.78E-05	0.023861365	0.007365216	0.014667927	0.026230471	0.048059644	0.398189609	0.046486648	0.05579872	0.581454355	0.032315638	0.026962203	0.85579054	0.033092857	0.026425351	0.698364016	0.02655166	0.009259259
PBLD	-	Alu	both	0.059340638	0.039147004	0.061215378	0.030264573	0.101230002	0.123184361	0.448429971	0.020122864	0.092592593	0.842759843	0.014715418	0.01716792	0.879454991	0.104803548	0.094834594	0.167788014	0.089945979	0.08353532	0.292206487	0.091805268	0.083621655	0.017938419	0.083024429	0.098453343	0.000860866	0.056398154	0.027901222	0.095640918	0.047478756	0.062259524	0.963777845	0.11612656	0.115717511	0.092104943	0.073375789	0.098608287	0.063315483	0.061997453	0.040044783	0.817573547	0.045096799	0.022727273
PBLD	-	Alu	both	0.025234819	0.026901395	0.048602167	0.001448303	0.070765446	0.098999436	0.040641436	0.015766784	0.048821549	0.425331559	0.00910021	0.020168951	0.992861473	0.089401894	0.075456533	0.741321765	0.069037805	0.067018651	0.395173404	0.061081145	0.064794573	0.008505473	0.065482079	0.075793711	0.003814134	0.040364041	0.021798293	0.056663906	0.034026792	0.05406254	0.105194926	0.086824984	0.112564476	0.17865862	0.05466221	0.065725093	0.146705647	0.047559616	0.025994607	0.798491241	0.026793598	0.041666667
PBLD	-	Alu	both	0.078103425	0.015535976	0.029319693	0.915506187	0.046046838	0.040813004	0.013706412	0.00992423	0.053703704	0.55254997	0.006483593	0.010152546	0.949712607	0.045126131	0.031067454	0.086441447	0.034767002	0.028617737	0.124755761	0.027039099	0.031204508	0.031098267	0.027778331	0.030768691	0.01276849	0.021287016	0.013895266	0.69143107	0.023754675	0.01678757	0.299778308	0.044549531	0.056613271	0.34792862	0.0305867	0.034296151	0.099523907	0.02403532	0.038463072	0.514590237	0.010081388	0
PBLD	-	Alu	no-conserve	0.000682489	0.013588947	0.047751175	0.300066017	0.04090601	0.044769022	0.0140059	0.011331056	0.058080808	0.184225772	0.009285967	0.015536005	0.149146931	0.031080352	0.029991981	0.08620567	0.033493367	0.028313261	0.252770088	0.035958643	0.029709133	0.017300024	0.028986366	0.031869788	0.002690058	0.019713564	0.009329751	0.249609859	0.021913408	0.031223687	0.014248298	0.049978542	0.071157854	0.720726308	0.024107962	0.015831756	0.634588333	0.032972808	0.037380492	0.482787468	0.01212449	0.017857143
MRPS16	-	Alu	no-conserve	0.005162965	0.011967101	0.004775443	2.55E-10	0.020922374	0.01116503	0.456104555	0.012816578	0.016753678	0.077643401	0.012163835	0.008548015	0.087557413	0.007925868	0.010569663	0.326487837	0.014871916	0.011871227	0.020438996	0.007880753	0.013116757	0.203797239	0.024094593	0.027829589	0.000106198	0.015173686	0.008545946	0.524027278	0.011956168	0.009816318	0.716447376	0.011192227	0.010909247	0.049527629	0.017997224	0.014242198	0.116022223	0.010875963	0.008349442	0.83556328	0.022344825	0.019942417
MRPS16	-	Alu	no-conserve	0.777478505	0.014653078	0.015279428	2.18E-18	0.022117997	0.010068043	0.107025726	0.014727029	0.005464481	4.41E-05	0.015428265	0.008136498	0.033888685	0.008737675	0.011825914	0.466905939	0.013400469	0.013747577	0.074096555	0.010749682	0.013800354	0.908573171	0.023729507	0.023286314	0.029364521	0.015198084	0.011742036	0.040772888	0.013628392	0.008144999	0.417024772	0.01187015	0.010484038	0.87984903	0.01938589	0.019411196	0.107901462	0.012530797	0.009975482	0.207517128	0.022311193	0.01000351
MRPS16	-	Alu	no-conserve	0.03284651	0.074543474	0.052417698	1.16E-37	0.094559471	0.042524927	0.08319995	0.077093914	0.046108059	2.12E-14	0.069610498	0.032304355	1.84E-06	0.035713795	0.065809553	0.009633163	0.076051097	0.063716494	0.029249777	0.054347298	0.06277572	0.017157575	0.120477922	0.13716637	2.84E-10	0.080071273	0.047390604	0.003064167	0.073992657	0.047453486	0.041294362	0.060690148	0.055138388	0.016565754	0.074712574	0.054926635	1.35E-09	0.060451729	0.038749433	0.282787874	0.086409546	0.060968522
MRPS16	-	Alu	no-conserve	0.000524198	0.05252339	0.027229256	3.80E-33	0.073565753	0.027692395	0.007100985	0.058065337	0.011187983	3.61E-12	0.051017057	0.020057975	4.04E-07	0.017046854	0.03493204	0.005124207	0.05387944	0.042530197	0.00048836	0.029589738	0.043659162	0.017207938	0.095973477	0.114959416	1.39E-12	0.063978933	0.032065031	0.020213426	0.048316648	0.034184811	0.498924479	0.035207797	0.032827328	0.001763636	0.060696822	0.040622859	0.00071314	0.041772816	0.031062411	0.03651008	0.056584159	0.020637309
MRPS16	-	Alu	no-conserve	0.003002192	0.020418607	0.011036283	1.95E-20	0.032371108	0.013958393	0.498503335	0.024437809	0.018344622	1.88E-08	0.020639277	0.008349138	0.000122557	0.006994015	0.016156203	0.192483096	0.021984076	0.019004464	0.074704447	0.014004662	0.016222823	0.244282473	0.040876831	0.045504981	2.88E-08	0.028706866	0.0139409	0.70936404	0.019763813	0.016729838	0.066453928	0.016738637	0.012877803	0.025676664	0.023223132	0.018867036	0.205763062	0.017403938	0.014685096	0.07445096	0.02422409	0.007142857
MRPS16	-	Alu	no-conserve	0.004665294	0.033171869	0.017698654	4.23E-29	0.053468533	0.019614252	0.019889283	0.037008119	0.013009686	1.39E-10	0.030428072	0.0118453	9.14E-05	0.010893785	0.021004033	0.722783356	0.036052095	0.035194575	0.000438408	0.022846639	0.035005654	0.023563713	0.06820089	0.07847576	2.23E-07	0.043276754	0.024449537	0.854328697	0.029721865	0.030220682	0.447393996	0.023776636	0.022182098	0.001790412	0.036860708	0.021939822	0.081866971	0.02573981	0.021687636	0.084003502	0.037492929	0.015819328
MRPS16	-	Alu	no-conserve	0.05112867	0.017113337	0.012846966	1.25E-17	0.023762458	0.010952326	0.116180256	0.017409128	0.007978789	0.000742426	0.015706845	0.009811727	0.000520283	0.009949173	0.017401815	0.067138678	0.018716246	0.022164086	0.160886072	0.019644242	0.022166623	0.0307117	0.029635086	0.038315166	0.000254898	0.016688338	0.011365778	0.011637326	0.018420164	0.010854297	0.260188684	0.018698455	0.016148344	0.154695708	0.01523526	0.01435893	9.38E-08	0.016663805	0.008751315	0.344629164	0.022195441	0.015040184
MRPS16	-	Alu	no-conserve	0.67639871	0.036078461	0.050396249	3.72E-19	0.048668554	0.023762254	0.334695972	0.038273377	0.042201637	2.05E-09	0.034490022	0.014981273	3.11E-05	0.015520939	0.026909218	5.36E-06	0.038349554	0.02681039	0.031971107	0.019761439	0.024669381	0.674619753	0.066584272	0.063808117	0.036096618	0.045375931	0.03612656	0.036360414	0.036641299	0.041734929	0.079866198	0.025750168	0.029718606	0.002038373	0.0400014	0.029043506	0.000324437	0.031376915	0.022956104	1	0.039567947	0.036610448
MRPS16	-	Alu	no-conserve	0.009491063	0.013410886	0.006804612	9.79E-23	0.027041911	0.009141812	0.177465198	0.017357962	0.007449073	3.29E-06	0.011823533	0.005561844	0.013543991	0.006434818	0.009673686	0.031746313	0.015359309	0.011691003	0.253337064	0.008499188	0.010119607	0.758675637	0.032943542	0.030695422	4.07E-06	0.020557113	0.010056111	0.03491838	0.014636846	0.008638147	0.084118004	0.010508978	0.008515175	0.000110091	0.01729608	0.007337619	0.002558531	0.012083182	0.008076519	0.603662647	0.01869009	0.014385965
MRPS16	-	Alu	no-conserve	0.229875717	0.013715753	0.009997259	1.11E-20	0.023123638	0.009831568	0.300467033	0.014941223	0.008927839	0.000795395	0.012756147	0.008000099	0.000681939	0.006877761	0.01573111	0.754524676	0.014978628	0.014912566	0.010056259	0.008245433	0.01215005	0.566730209	0.030988033	0.026738315	2.99E-10	0.020834608	0.00860799	0.174267601	0.013250101	0.010876265	0.378552562	0.008804639	0.007772232	0.018971797	0.017060939	0.011876685	0.064973226	0.010075191	0.008065886	0.059426081	0.016507362	0.003731343
MRPS16	-	Alu	no-conserve	0.059250038	0.018053272	0.010879701	2.94E-26	0.034719531	0.008648289	0.947637279	0.02428921	0.021659645	1.65E-07	0.025100893	0.010202011	0.000782033	0.007078541	0.014285542	0.391500072	0.021139827	0.018150334	1.12E-05	0.010306524	0.022581706	0.002859687	0.061797928	0.079274645	1.74E-06	0.027634192	0.012119441	0.808436795	0.018947052	0.016654457	0.367924747	0.013267	0.011315196	4.88E-05	0.028336396	0.012352468	0.000375118	0.015519506	0.009353877	0.795237357	0.02557471	0.017646049
MRPS16	-	Alu	no-conserve	0.000145327	0.177672006	0.084496216	1.35E-41	0.262232156	0.093833265	0.051829214	0.203363286	0.100498609	5.33E-16	0.162560481	0.061392705	1.52E-08	0.080720509	0.148209314	0.089601357	0.195345975	0.172129632	3.57E-06	0.120161138	0.168253732	0.000636987	0.352902615	0.435413906	5.36E-20	0.229585589	0.097849504	0.000353481	0.176265373	0.099039865	0.470010197	0.130724159	0.12417994	5.27E-06	0.178059069	0.106666787	5.10E-07	0.14593371	0.10204961	0.064841709	0.18046831	0.092510279
MRPS16	-	Alu	no-conserve	0.049615758	0.033490027	0.018426553	5.02E-16	0.063921612	0.031196297	0.481221596	0.03860087	0.047314962	3.76E-06	0.03694353	0.016030708	0.030065283	0.024102743	0.037115011	0.155903924	0.042563222	0.03359918	0.007014759	0.024525683	0.036505519	0.118981614	0.083147867	0.095542431	0.171254741	0.049497221	0.042307426	0.90791563	0.041582281	0.037822459	0.068088752	0.027485644	0.031488764	0.780842409	0.0434329	0.043739607	0.269395713	0.031482065	0.035115538	0.348475486	0.037959059	0.063075448
MRPS16	-	Alu	no-conserve	0.114107455	0.196735265	0.154929603	1.53E-33	0.297604863	0.164300953	0.085006239	0.23664722	0.146774495	1.79E-12	0.269386382	0.155946621	1.37E-05	0.135959664	0.199127904	0.000461772	0.253349616	0.218576721	1.25E-06	0.159564946	0.227947254	0.039003228	0.335236804	0.376445124	3.62E-08	0.270040532	0.187856133	0.239282608	0.250610225	0.224058766	0.387745054	0.178299077	0.184746101	0.002445364	0.259934778	0.195016341	0.180875401	0.19544948	0.181193226	0.635877463	0.243788	0.209564089
MRPS16	-	Alu	no-conserve	0.005129812	0.17698767	0.103026148	2.99E-35	0.240397087	0.103300181	0.012064307	0.213419262	0.064965273	7.77E-15	0.220879542	0.089275558	2.06E-09	0.071451745	0.157526407	0.033560442	0.200114402	0.181494874	1.73E-07	0.12158242	0.191602587	0.093310625	0.310425907	0.342516625	8.95E-13	0.231354946	0.132324888	0.034595291	0.20240199	0.151990746	0.609003032	0.141915076	0.13533963	3.42E-08	0.229330718	0.119728667	0.002655039	0.143818308	0.119035468	0.42203807	0.172282753	0.122192671
MRPS16	-	Alu	no-conserve	0.011057533	0.062086071	0.027469965	1.43E-25	0.087052356	0.031206908	0.029831217	0.078050698	0.016260163	1.05E-13	0.089486781	0.028169256	5.25E-08	0.019634778	0.050283533	0.162221047	0.07005535	0.06104372	1.19E-07	0.035798478	0.07167952	0.005251887	0.145647647	0.177812238	8.75E-10	0.083397416	0.037229696	0.015931358	0.073870259	0.043155192	0.668637427	0.041719741	0.036805188	1.52E-05	0.080603006	0.037061513	0.512325201	0.042177024	0.037374622	0.843369937	0.052407966	0.042553192
MRPS16	-	Alu	no-conserve	0.983940864	0.015229611	0.019212834	0.000521742	0.018047745	0.013046067	0.040982505	0.014745695	0.034364926	4.55E-06	0.014723033	0.00546761	0.371527812	0.010617116	0.012146639	0.83509424	0.015466787	0.014305168	0.00759243	0.011210764	0.016434622	0.751260879	0.027687161	0.023945448	0.171551754	0.017961229	0.020806572	0.665005056	0.011634568	0.015087623	0.367926509	0.01230748	0.012844957	0.414026549	0.015952223	0.017754109	0.663592222	0.011682348	0.009158892	0.464827664	0.02044498	0.009433962
MRPS16	-	Alu	no-conserve	0.133282547	0.031993908	0.066973713	3.58E-13	0.049272477	0.024180879	0.146818927	0.033352863	0.068313766	2.66E-07	0.028750367	0.013079915	0.050228631	0.01694309	0.022406781	1.14E-05	0.038129111	0.023346536	0.003691499	0.015769143	0.021994587	0.961623409	0.061792343	0.053681302	0.134586028	0.042538693	0.03406674	0.000695493	0.031536622	0.053815672	0.727970763	0.023072684	0.022341978	0.419187128	0.029556339	0.039237713	0.000791847	0.024621109	0.015345546	0.283255397	0.030121765	0.034136972
MRPS16	-	Alu	no-conserve	0.28176439	0.015804532	0.028070353	0.000330088	0.02211369	0.016769852	0.022345267	0.015427841	0.03616574	0.004788068	0.015252485	0.010522958	0.521583632	0.020248389	0.018441697	0.903642298	0.019551991	0.018246221	0.117257382	0.013137749	0.015148606	0.322152019	0.023504083	0.027192774	0.363382482	0.02007482	0.017286852	0.474420761	0.017278169	0.014270137	0.232734526	0.016954504	0.019703569	0.732468546	0.016732988	0.024685808	0.108342104	0.015710623	0.01893494	0.807384132	0.020537627	0.028046422
MRPS16	-	Alu	no-conserve	0.002317711	0.155499686	0.08130807	2.01E-41	0.236138252	0.087286449	0.083198424	0.196464375	0.101961558	1.18E-15	0.176724672	0.063354194	1.37E-08	0.066731091	0.129753871	0.00244059	0.172418763	0.143699079	1.60E-06	0.108073963	0.161452522	0.002204837	0.303019372	0.368815812	5.16E-13	0.191878904	0.097038706	0.00385681	0.171543718	0.11294633	0.398738154	0.11647451	0.106133351	1.10E-05	0.209415025	0.121475477	0.024992912	0.111000678	0.094886883	0.264635283	0.163456806	0.101160696
MRPS16	-	Alu	no-conserve	0.000351072	0.081741091	0.025464611	4.21E-35	0.135867586	0.034709664	0.243285434	0.109994392	0.055873016	5.24E-15	0.093877103	0.024178708	8.51E-08	0.021851483	0.052426954	0.071290087	0.084141905	0.067823143	1.47E-07	0.042926607	0.079797465	0.003092423	0.199894024	0.252817259	6.47E-16	0.111662161	0.03544685	0.031717151	0.087368774	0.051958141	0.570398124	0.046961925	0.042100216	2.03E-06	0.114417544	0.050528207	0.146125065	0.046127194	0.042526002	0.107759833	0.084657655	0.023392857
MRPS16	-	Alu	no-conserve	0.032696374	0.020438816	0.008717446	4.15E-25	0.039663729	0.007479872	0.013987973	0.030404627	0	7.67E-11	0.024765336	0.003834199	0.002255132	0.005509133	0.010521334	0.568391875	0.021697679	0.016115176	2.41E-08	0.007936459	0.020730053	0.031702051	0.068288171	0.081417304	7.57E-08	0.031016961	0.009218123	0.205109158	0.020801743	0.01308181	0.674041753	0.009390348	0.008291368	0.001226447	0.02262205	0.008348161	0.220111572	0.009964693	0.007452047	0.166743852	0.015222622	0
MRPS16	-	Alu	no-conserve	0.752677213	0.045520024	0.047626864	3.66E-11	0.055230566	0.031262055	0.21334167	0.038589074	0.017515348	5.30E-06	0.034148715	0.01627661	0.089082718	0.027037167	0.033160537	0.039640052	0.040534356	0.031363715	0.131948111	0.027012942	0.028846588	0.324216212	0.056316929	0.046598955	0.038132081	0.044702715	0.033560621	0.387156369	0.037661882	0.03000468	0.012393286	0.032144348	0.041142706	0.046873109	0.053067204	0.039985147	0.009315808	0.036305723	0.025599489	0.831438167	0.054908065	0.047364672
MRPS16	-	Alu	no-conserve	0.157410468	0.087529917	0.063710503	1.27E-29	0.148152653	0.05785459	0.036958415	0.093444583	0.030867889	7.43E-11	0.089897898	0.034927343	3.32E-05	0.028749452	0.056551667	0.000609542	0.080384934	0.060430879	0.009539922	0.041571742	0.053612012	0.420376631	0.145343753	0.151029735	7.24E-08	0.107093823	0.057350259	0.361544749	0.098640164	0.075166936	0.549735499	0.057025959	0.056723425	1.23E-05	0.113851966	0.057876701	0.006153701	0.077244218	0.062759822	0.737145251	0.104216315	0.075659229
MRPS16	-	Alu	no-conserve	0.404607805	0.022449003	0.018377512	0.003911861	0.027058304	0.021482548	0.112635757	0.02485499	0.057394935	0.032963522	0.020215529	0.013275989	0.035664798	0.029356472	0.018709822	0.371227329	0.020789395	0.019475241	0.357106751	0.019589459	0.016071221	0.766003045	0.028061954	0.027082591	0.183459688	0.025466382	0.022944342	0.571699749	0.021229978	0.022842278	0.067028976	0.020907708	0.026983298	0.484589314	0.031794087	0.032513355	0.734829596	0.022454083	0.022449001	0.378608465	0.036610348	0.0234375
MRPS16	-	Alu	no-conserve	0.000419844	0.397082142	0.279112581	4.37E-44	0.475068485	0.286422219	0.100689829	0.425288418	0.307266857	2.52E-19	0.432858342	0.237054132	8.56E-09	0.232880667	0.343212295	3.66E-05	0.411338798	0.366652424	0.002609949	0.316346913	0.366765159	0.402953814	0.524052112	0.55146301	4.19E-18	0.433842426	0.290326458	3.50E-05	0.443032648	0.324805923	0.50697164	0.345285716	0.350351974	2.79E-08	0.469545624	0.341924608	1.92E-07	0.36621128	0.301803788	0.163817695	0.394920582	0.301156116
MRPS16	-	Alu	no-conserve	0.004779709	0.178588673	0.115187497	2.14E-21	0.201724099	0.127086445	0.142991066	0.191877224	0.128703353	6.74E-11	0.197154611	0.111847672	0.036272566	0.134649669	0.154412392	0.004065384	0.184911893	0.157522484	5.92E-05	0.118092701	0.157778712	0.037479071	0.274149887	0.308778577	8.75E-10	0.192829558	0.122859482	0.001410257	0.187869566	0.132515757	0.702261209	0.145991786	0.143938495	4.96E-07	0.220747056	0.136619559	0.0001633	0.162633221	0.131671141	0.289995833	0.179184136	0.124314087
MRPS16	-	Alu	no-conserve	0.029489478	0.017840916	0.014316824	1.57E-09	0.017626792	0.008692199	0.063438714	0.018537967	0.002564103	9.73E-05	0.017110971	0.009414448	0.798746893	0.013826098	0.011709181	0.555596762	0.011936616	0.010812248	0.153182545	0.012273135	0.013704357	0.369849652	0.027095906	0.028828246	0.000873521	0.019271087	0.011138161	0.004881344	0.013287981	0.005810236	0.009814723	0.012374514	0.017238472	0.035969248	0.015673515	0.011042379	0.088512929	0.015486232	0.011750245	0.608174177	0.016292121	0.021293801
MRPS16	-	Alu	no-conserve	0.001991886	0.027676333	0.052078122	4.78E-09	0.029645811	0.045886985	0.279893758	0.023013385	0.052342939	0.317194044	0.019228298	0.01825245	0.678838117	0.029166254	0.025966074	0.030654802	0.036321196	0.027526778	0.196969134	0.027217432	0.026326312	0.859790423	0.021957723	0.022353631	0.017222309	0.024744262	0.032685092	0.041953787	0.023000136	0.035599126	0.001675031	0.035463805	0.048163033	0.120655046	0.025356926	0.044564029	0.251612146	0.027145331	0.029913736	0.093072859	0.027505068	0.067460318
MRPS16	-	Alu	no-conserve	0.056881959	0.11014019	0.072882549	2.15E-20	0.150034224	0.082567235	0.704805652	0.132193399	0.143390494	1.73E-10	0.128827169	0.064176095	4.97E-06	0.058215097	0.095248698	0.119332644	0.116619593	0.104081278	6.73E-08	0.067256353	0.112871631	0.071411663	0.196449988	0.22640347	3.04E-07	0.133637386	0.078280647	0.000785684	0.129724864	0.077088232	0.155341343	0.073594416	0.079231577	0.000431239	0.127135788	0.08201092	0.004401468	0.092903801	0.069527747	0.372150654	0.109559847	0.062200957
MRPS16	-	Alu	no-conserve	0.054336798	0.039617307	0.023194907	5.99E-22	0.051253574	0.021393176	0.078338671	0.033108806	0.008792357	2.98E-07	0.032517394	0.01474094	0.00250279	0.020728726	0.032870169	0.529379967	0.037629582	0.036791522	7.51E-05	0.027517742	0.041450724	0.286339017	0.063648494	0.066304138	2.23E-08	0.038302661	0.017377601	1.41E-05	0.037544982	0.014070182	0.233772512	0.032650003	0.036983476	0.001278682	0.028880541	0.016147066	4.01E-05	0.037920599	0.023476715	0.131808835	0.04583158	0.008333333
MRPS16	-	Alu	no-conserve	0.020190139	0.041024657	0.019862637	3.62E-27	0.054635502	0.019304132	0.042474207	0.035321511	0.006578947	1.57E-11	0.035117582	0.012019593	1.35E-05	0.013456682	0.030435204	0.666464235	0.041043982	0.037146578	2.25E-05	0.026763164	0.042903757	0.143453213	0.06653015	0.07312142	1.36E-11	0.042056867	0.01531848	0.000174993	0.042222161	0.019047071	0.244333251	0.034865461	0.036609328	3.18E-05	0.032977545	0.014866297	4.30E-07	0.040160522	0.021216412	0.405649535	0.051540346	0.023039216
MRPS16	-	Alu	no-conserve	0.00793543	0.016019879	0.005688851	1.08E-13	0.023804243	0.010944967	0.103975455	0.015064686	0.002564103	0.042980254	0.013846758	0.009935641	0.65993595	0.01287273	0.010760901	0.17349821	0.016462397	0.011657936	0.019913745	0.010594959	0.013769882	0.495009184	0.027107242	0.02801633	0.000246325	0.016432813	0.009087024	0.045730047	0.016720922	0.010619391	0.363524387	0.013575526	0.01583734	0.000579662	0.01505113	0.006171492	0.001610318	0.016602174	0.008934814	0.085164176	0.024138878	0
MRPS16	-	Alu	no-conserve	0.310536128	0.017683868	0.01232776	2.98E-14	0.028285461	0.013503749	0.034285518	0.017200382	0	0.000216809	0.015920605	0.008598306	0.400356521	0.020861912	0.015117971	0.001209426	0.018340521	0.022843703	0.004417109	0.014476605	0.019452971	0.796537497	0.030618059	0.032366948	0.317714919	0.017471601	0.015361759	0.700820717	0.018605176	0.016061211	0.630982496	0.016429825	0.016412856	0.00906413	0.023849399	0.014078481	0.036599303	0.017648247	0.011289516	0.84310635	0.028373143	0.022817461
MRPS16	-	Alu	no-conserve	0.778760802	0.008095271	0.01018685	2.08E-08	0.009824681	0.004511845	0.485621493	0.007697387	0.003030303	0.072279781	0.006382769	0.004202987	0.624571902	0.008880381	0.009365102	0.119936507	0.007019609	0.007310846	0.022366644	0.005867597	0.007190253	0.328399653	0.011663185	0.009369753	0.143920852	0.00780674	0.005761567	0.339843427	0.006338399	0.005041153	0.324084703	0.006550961	0.007376393	0.882486583	0.009558263	0.008590521	0.611213046	0.00607843	0.004100926	0.617247874	0.010160951	0.01010101
MRPS16	-	Alu	no-conserve	0.019365284	0.074494969	0.046420272	1.38E-26	0.104319645	0.049259785	0.095509764	0.092547233	0.044846706	1.17E-08	0.079692733	0.044105947	3.09E-06	0.038582805	0.075223267	0.655343923	0.075473135	0.076024583	2.69E-05	0.053976373	0.082553262	0.021423918	0.133723926	0.163477731	7.41E-07	0.076057223	0.044544004	0.000651552	0.08508511	0.050573046	0.983694358	0.061680644	0.062548838	1.50E-05	0.096745589	0.061835897	0.000336328	0.059108273	0.040373194	0.841988058	0.099080519	0.093240093
MRPS16	-	Alu	no-conserve	0.206501834	0.020174004	0.018783155	0.000485163	0.022367365	0.016359617	0.704694807	0.01671563	0.011607861	0.168655837	0.015890044	0.018992083	0.095324623	0.029668658	0.022011015	0.727572101	0.02032176	0.018517657	0.22658615	0.018045245	0.019138267	0.253672937	0.01960465	0.015458005	0.50864474	0.018430932	0.016027565	0.405132383	0.02026844	0.023044367	0.610029116	0.021144114	0.020423113	0.387926395	0.020802153	0.024294178	0.736099785	0.018067767	0.015104599	0.743824201	0.0297935	0.027220395
MRPS16	-	Alu	no-conserve	0.172763616	0.007115389	0.004172182	1.82E-12	0.011238487	0.003858297	0.004963876	0.008289606	0.039368215	0.460697933	0.006426992	0.005386881	0.764795786	0.014482599	0.007331024	0.843466806	0.007391156	0.005111327	0.000633392	0.005303023	0.008424801	0.382781988	0.011313187	0.014728288	0.005519456	0.008425127	0.005914155	0.628269332	0.009649778	0.00920658	0.360400723	0.006909003	0.005247452	0.111694267	0.010511945	0.00897225	0.753085668	0.006374149	0.005805293	0.294233963	0.010941773	0
KCNMA1	-	no-repetitive	both	2.01E-06	0.00932713	0.03629281	0.159154218	0.020065951	0.022485606	0.000856828	0.011198752	0.033401858	0.293502627	0.005051111	0.00257047	0.309874925	0.005474862	0.014303135	0.007714477	0.015118839	0.025273954	0.192808757	0.014293962	0.013057002	0.11160607	0.009402571	0.005151515	0.266941483	0.01031512	0.008601502	0.323820986	0.012988789	0.016620087	0.041820111	0.041074871	0.04620727	0.596873994	0.022337571	0.022216228	0.157225125	0.007737519	0.004371097	0.09914012	0.010213785	0.010683761
DDX6	-	no-repetitive	no-conserve	0.000340518	0.050476076	0.017905515	1.47E-40	0.077861343	0.012926755	0.009563748	0.061316906	0.005241926	1.79E-12	0.039065052	0.00877756	2.17E-06	0.012358072	0.0282549	0.079757897	0.033459602	0.027176162	0.002478994	0.020047582	0.027772353	0.01255072	0.081930013	0.0492178	1.17E-14	0.070831203	0.021789412	0.008246798	0.043126457	0.023315052	0.123868701	0.025685973	0.0202362	7.57E-08	0.043766222	0.015150687	5.71E-05	0.021757027	0.012175008	0.37055721	0.046694894	0.018640748
PVRL1	-	no-repetitive	no-conserve	1.05E-05	0.020845792	0.004851742	5.80E-10	0.02075588	0.005070796	0.693440059	0.01662405	0.020220588	1.84E-15	0.012002734	0.002140046	0.073224249	0.008751682	0.01520171	0.31448314	0.010506972	0.005371103	0.00244272	0.008597741	0.001234568	0.000221513	0.018073147	0.008148148	3.22E-08	0.021028165	0.006631238	0.126831572	0.014094741	0.011246866	0.026447116	0.010920372	0.005746802	0.000147463	0.011000885	0.002426795	0.00533426	0.011259828	0.006253925	0.077295845	0.017547306	0
LDHA	+	no-repetitive	no-conserve	0.160300966	0.003175784	0.00398113	0.023346951	0.004326938	0.004846272	0.975823917	0.003080979	0.00308538	0.062359766	0.003071427	0.002645295	0.698927721	0.002995916	0.003127138	0.017620222	0.003740597	0.004322529	0.740485102	0.0031652	0.003336371	0.141704966	0.002878584	0.002441831	0.261651234	0.004095451	0.004811227	0.919573024	0.002667222	0.002645961	0.101145542	0.00303801	0.002450041	0.027032204	0.000294629	0.000210314	0.884344272	0.00332981	0.003319881	0.042042009	0.001263569	0
TP53I11	-	no-repetitive	no-conserve	0.487490666	0.010109411	0.00711555	6.23E-12	0.020629384	0.007408827	0.150955225	0.013465349	0	0.001154234	0.010720089	0.002747427	0.001007599	0.006917324	0.014803359	0.756152936	0.009116659	0.01084237	0.000558259	0.009333662	0.011026453	0.265557209	0.009432494	0.014367201	0.000351962	0.020016208	0.00931241	0.622225814	0.012885134	0.007869417	0.762237673	0.006814245	0.006653783	0.000211373	0.011206723	0.007771793	0.45939716	0.009730978	0.007678917	0.843295481	0.010399709	0.01
TRIM5	-	Alu	no-conserve	0.553744904	0.012529397	0.017233601	0.148481424	0.013327138	0.016347118	0.709565839	0.012143786	0.006940041	0.183996366	0.010404915	0.007372666	0.091418838	0.013454782	0.015840287	0.551585013	0.015065784	0.015327946	0.56053001	0.0134505	0.012436265	0.611377207	0.011235404	0.011177622	0.068915184	0.011233905	0.007594576	0.151352267	0.010963246	0.012512266	0.451919085	0.014156487	0.010806519	0.298736008	0.011785833	0.025949	0.06825979	0.015864058	0.012570321	0.082270341	0.029318938	0.075902993
TRIM5	-	Alu	no-conserve	0.180490078	0.013782435	0.009151278	0.889994766	0.011661494	0.011009037	0.007328789	0.011158625	0.056982741	0.148138467	0.008578423	0.004939951	0.049021052	0.024562805	0.012025096	0.030014766	0.018448904	0.012221478	0.23031893	0.0201506	0.015028179	0.033365362	0.013648098	0.006048462	0.35886921	0.010272164	0.009226247	0.722143082	0.011164506	0.007365051	0.502373151	0.022615029	0.018026357	0.173801377	0.01302437	0.007506641	0.019615984	0.018551563	0.012773964	0.001515044	0.024936421	0.121491228
TRIM5	-	Alu	no-conserve	0.901634025	0.018672316	0.01882656	0.042165429	0.018622108	0.022852893	0.1294618	0.017896267	0.039818594	0.013485891	0.01312094	0.005227893	0.591998768	0.03148784	0.030835385	0.796192292	0.027489427	0.028042563	0.908978226	0.025645977	0.024971584	0.418980625	0.020619639	0.019988615	0.007395682	0.015222275	0.009916893	0.34332526	0.01730803	0.018237375	0.440479397	0.028130584	0.024965137	0.25337704	0.016910498	0.011336853	0.204474216	0.028126568	0.023798316	0.001807709	0.02818563	0.089037698
FADS1	-	Alu	rhesus	0.015276105	0.007777319	0.018113927	0.876659547	0.010039983	0.012608812	0.887067083	0.007530019	0.005009039	0.000685598	0.008342201	0.005353841	0.008435215	0.009157286	0.017925964	0.697023832	0.012865272	0.014037826	0.04050837	0.012624404	0.017827784	0.242360636	0.007816372	0.007538456	0.638540776	0.00888274	0.008944355	0.351861925	0.013467825	0.009688608	0.169734783	0.014592073	0.013721372	0.152535823	0.012088902	0.008574562	0.792424052	0.011020424	0.010313105	0.931412148	0.00903082	0.013157895
FADS1	-	Alu	both	0.474983125	0.009593066	0.016635183	0.875746969	0.013826109	0.018872051	0.219171993	0.010400975	0.028317638	0.00171452	0.013796499	0.012146395	0.035576739	0.01663779	0.025650854	0.075637252	0.017858072	0.013799165	0.014950718	0.013956961	0.023994612	0.285773318	0.01058796	0.00933429	0.401302301	0.012019154	0.012859257	0.254927749	0.014269328	0.01513884	0.024100501	0.016041026	0.018147564	0.669627031	0.017523631	0.024883032	0.07583041	0.013527347	0.02092323	0.022605119	0.012942423	0.044013505
FADS1	-	Alu	both	0.564429363	0.008680935	0.021843537	0.342472309	0.012198578	0.020002774	0.730948435	0.010912861	0.010250896	4.75E-07	0.01283701	0.002750029	0.484077562	0.017896846	0.012775479	0.989094834	0.013936839	0.015355942	0.263988403	0.01416497	0.018036507	0.024334359	0.009046416	0.006280216	0.313340137	0.011305916	0.013032023	0.552662853	0.013470689	0.010647219	0.098028283	0.013658534	0.01546326	0.541606115	0.018376322	0.019857749	0.577423119	0.011686352	0.013885904	0.779771486	0.016815733	0.022727273
FADS1	-	Alu	chimp	0.000762426	0.022213553	0.078477423	0.014212109	0.036863595	0.046159286	0.004386542	0.024046841	0.118092502	0.000716018	0.02875914	0.022592656	0.000362678	0.03451664	0.059259851	0.48889806	0.046419521	0.050625852	0.005978418	0.028874719	0.044855242	0.977208162	0.025778147	0.026297891	0.013388943	0.031707831	0.039517602	0.009931044	0.031162139	0.04078504	0.060377531	0.041908825	0.053043367	0.664711243	0.031320837	0.041830369	0.210902024	0.04189537	0.049258803	0.505350282	0.027996912	0.05131579
FADS1	-	Alu	chimp	0.000269451	0.015267378	0.052232883	6.40E-05	0.023183283	0.03787392	0.029347758	0.017339529	0.051066218	0.000168209	0.021682492	0.020125603	0.000414204	0.026392012	0.050819453	0.045191791	0.034517273	0.044740372	0.000306172	0.02471377	0.049184373	0.281860401	0.018479872	0.017904568	0.047381968	0.021699359	0.026426853	0.066860073	0.025244144	0.031499838	0.011280088	0.026610532	0.033683675	0.651034675	0.029276688	0.043617434	0.012591877	0.021489181	0.037199859	0.628089587	0.024266254	0.033333334
FADS1	-	Alu	chimp	0.102002578	0.007861505	0.023356244	0.096633704	0.013960199	0.01107745	0.19598299	0.008320846	0.014607615	0.021713315	0.010724811	0.009411616	0.547881009	0.014857875	0.01598977	0.080319893	0.015561563	0.020650341	2.24E-05	0.009745062	0.024510507	0.922356762	0.013082476	0.013858669	0.423799853	0.011845238	0.011900616	0.088253184	0.013552802	0.016851705	0.002163669	0.016639949	0.020127511	0.505653332	0.020273206	0.019908854	0.480769277	0.012508087	0.01631249	0.949352713	0.020228419	0.041666667
GANAB	-	no-repetitive	no-conserve	0.762251657	0.004552833	0.003693204	0.765297679	0.004372021	0.004379637	0.979378947	0.003138321	0.002687072	0.710531306	0.003651426	0.004425462	0.231919617	0.003098324	0.002564576	0.546633325	0.003869735	0.003707785	0.097674441	0.003571241	0.004202416	0.400902955	0.003684053	0.003524369	0.371535648	0.004026776	0.004799571	0.626410196	0.00353096	0.003142695	0.906226787	0.003775728	0.003600983	0.247814291	0.000893306	0.001007853	0.262463565	0.00353931	0.003600707	0.183714888	0.002560039	0
ZBTB3	-	Alu	no-conserve	0.005986385	0.060023987	0.012820513	6.84E-06	0.076439912	0.035920363	0.588844613	0.049483037	0.022988506	0.001828844	0.042702473	0.00897753	0.019213764	0.074947724	0.05268313	0.031374876	0.034117977	0.049094051	0.794634905	0.04413768	0.042595809	2.76E-05	0.03358848	0	0.000915443	0.044730103	0.012260261	0.163462568	0.063964004	0.02390584	0.077988332	0.082715826	0.062567816	0.007238172	0.045447763	0.016666667	0.018981958	0.070312598	0.047174655	0.955513159	0.07195545	0.049043062
ZBTB3	-	Alu	chimp	0.481488315	0.023713488	0.014674845	1.20E-05	0.03932935	0.015691292	0.963498885	0.024295826	0.01010101	0.058882421	0.017958101	0.004988662	0.124136289	0.025107453	0.015445887	0.229757389	0.023315688	0.023249167	0.655355219	0.019044201	0.015005517	0.018838604	0.018647853	0.002583333	0.127576778	0.019195443	0.010853354	0.993974609	0.020651948	0.017018929	0.811903216	0.03305257	0.031051874	0.003956299	0.044306175	0.017412515	0.428568212	0.032401214	0.027080299	0.280579507	0.02279044	0.033991228
ZBTB3	-	Alu	chimp	0.60791463	0.027860586	0.022328549	0.002680547	0.035885195	0.022752461	0.883533106	0.031408382	0.011111111	0.840842944	0.020030602	0.015266876	0.772741803	0.039999992	0.045982304	0.691413431	0.023086415	0.024958198	0.933341708	0.031255915	0.028719045	0.006354366	0.017085837	0.003076923	0.074474522	0.019910099	0.010545106	0.493948029	0.035938383	0.02289916	0.201351734	0.046681119	0.039837762	0.121859589	0.053815142	0.036540755	0.07991988	0.033534548	0.021540024	0.136336539	0.026569267	0.052777778
TMEM223	-	Alu	both	0.140932879	0.029055709	0.045211325	0.002071858	0.041636271	0.034736514	0.682436028	0.032486092	0.033901126	0.003315692	0.0296273	0.019617498	0.769209323	0.028117041	0.030827831	0.162039882	0.035481738	0.031065892	0.96682446	0.028720097	0.030122841	0.696263112	0.03748727	0.035379061	0.119963673	0.034209385	0.030045723	0.963392297	0.033570176	0.032668863	0.902886805	0.029971158	0.029432297	0.500275263	0.031865216	0.037699571	0.001743096	0.038224047	0.029732976	0.118354646	0.027142641	0.054671228
SLC25A45	-	Alu	no-conserve	0.848226245	0.038509775	0.034853801	0.969042884	0.12285602	0.128090717	0.972638456	0.053818128	0.066666667	0.360453319	0.044563159	0.028170701	0.427808475	0.063605079	0.070021196	0.314218275	0.084359249	0.075059381	0.14095813	0.069424085	0.083473129	0.085400296	0.099567715	0.122683577	0.000901623	0.097905075	0.056542239	0.017551592	0.074425942	0.122979811	0.746060002	0.101726712	0.110000023	0.928618685	0.148789932	0.146858173	0.037328194	0.09576089	0.075471571	0.339850588	0.026208512	0
SLC25A45	-	Alu	no-conserve	0.363816166	0.020798363	0.010632642	0.086360769	0.063227746	0.080613142	0.781868824	0.029285302	0.033333333	0.168700122	0.02198445	0.012540853	0.180122141	0.029222837	0.043615701	0.342239123	0.045961436	0.043455187	0.526661712	0.03141399	0.034167149	0.121217485	0.054047912	0.07414258	0.003808125	0.049714694	0.031115274	0.000170536	0.036268674	0.076687869	0.634230647	0.046126262	0.062898603	0.373476507	0.085165445	0.072653117	0.513511171	0.050058738	0.040553112	0.43279836	0.016675339	0
SLC25A45	-	Alu	chimp	0.232903518	0.035924153	0.014035088	0.055280798	0.210842193	0.245159469	0.171537399	0.068969114	0.155555556	0.753676283	0.046830277	0.045177045	0.026793484	0.115089131	0.181474341	0.172361457	0.170863388	0.143783418	0.193605205	0.124830911	0.146441761	0.31331035	0.182102648	0.156809187	8.03E-06	0.15311153	0.060767115	0.00064931	0.120288203	0.246249059	0.013560986	0.175345787	0.14015135	0.497504764	0.069511541	0.051239669	0.893075565	0.202386218	0.201947345	0.522238297	0.032189834	0
MALAT1	+	no-repetitive	no-conserve	0.297257607	0.173869935	0.135406352	6.18E-07	0.10260539	0.142260019	0.939559682	0.170865044	0.154414422	0.594013538	0.120289151	0.109574628	0.128361165	0.146738006	0.183362347	0.203786688	0.09606124	0.094066271	0.674602176	0.180062604	0.154835578	0.00209979	0.063446038	0.021883117	0.326165938	0.12609825	0.142823417	0.676367469	0.137356694	0.113594858	0.288395615	0.079510973	0.086355322	0.293871363	0.027447569	0.021523687	8.60E-06	0.152190998	0.197123045	0.587666273	0.045880034	0.022727273
AP5B1	-	Alu	both	0.200138244	0.059930545	0.031785487	6.63E-06	0.078405563	0.132827295	0.794811985	0.038546281	0.128205128	0.139731963	0.071569132	0.051810166	0.898693084	0.077093707	0.072334003	0.002863274	0.065736154	0.08043666	0.297441245	0.065978345	0.076221899	0.017128552	0.017643798	0	0.538068711	0.054288615	0.056997013	0.647349904	0.070971327	0.063737811	0.329309543	0.051226489	0.056580369	0.013506567	0.141586346	0.112634666	0.106390436	0.08558708	0.099221407	0.243067378	0.031962484	0.068181818
AP5B1	-	Alu	both	0.216069568	0.110738889	0.096027397	0.000225821	0.203821792	0.140773489	0.205366436	0.082662132	0.178571429	0.001165175	0.122160506	0.064094916	0.072929246	0.110097807	0.149386874	0.000110579	0.129488264	0.179735047	8.20E-05	0.095785805	0.17319058	0.003353693	0.052802569	0.002	0.016848398	0.155580323	0.104775969	0.387771148	0.15526168	0.19915732	0.031170893	0.08863991	0.119529926	3.85E-05	0.152912208	0.068874556	0.006622843	0.163648021	0.111120123	0.530037741	0.018212996	0
AP5B1	-	Alu	both	0.6716179	0.033142711	0.049314463	0.165284861	0.049528257	0.037739305	0.239722314	0.02640011	0	0.022385169	0.031611105	0.015140432	0.014425944	0.032545525	0.057956379	0.067129605	0.040193533	0.045971572	0.100393759	0.026639237	0.038401572	0.002284025	0.021747241	0.001818182	0.323599078	0.04400241	0.0404131	0.197276361	0.036531148	0.045080686	0.031685343	0.028643375	0.038505529	0.003302321	0.034925922	0.013452015	0.030062805	0.042880155	0.024445846	0.599018497	0.007351597	0
AP5B1	-	Alu	chimp	0.42816886	0.145177711	0.117081214	3.52E-05	0.24596447	0.187772279	0.584322157	0.126125639	0.150997151	0.00855551	0.159314628	0.110139797	0.003792502	0.118087796	0.178741577	0.242610667	0.172020182	0.186143447	0.008015447	0.119204245	0.161183977	0.007473088	0.087589282	0.024272727	0.000178734	0.209444511	0.137804351	0.24576159	0.20726198	0.17438219	0.010922493	0.126833145	0.167517821	0.001666178	0.16566211	0.091787527	0.00018954	0.197412734	0.136246968	0.445320759	0.025978574	0
AP5B1	-	Alu	both	0.207277551	0.171812	0.138945978	0.063258635	0.27149208	0.25285926	0.542116586	0.140829313	0.181372549	0.011623863	0.184111233	0.135828484	0.077533098	0.196322977	0.244924502	0.010965311	0.203397428	0.245815276	0.015288917	0.152857625	0.207373576	0.006817022	0.09319591	0.021969697	0.000179423	0.238607385	0.165978725	0.067628072	0.239051054	0.18996114	0.003763627	0.156365494	0.225942215	0.001870376	0.196425556	0.11137132	0.000341516	0.242280303	0.180939737	0.439010901	0.030056073	0
AP5B1	-	Alu	both	0.702364713	0.098917715	0.081952689	0.057609494	0.118047488	0.091451539	0.43096606	0.074382054	0.116138763	0.000285126	0.106751676	0.053677774	7.54E-06	0.082709751	0.173868862	0.000572385	0.11096163	0.148071686	2.01E-05	0.078335585	0.158046468	0.000232908	0.056276495	0.001666667	1.16E-06	0.122517767	0.047651822	0.205678408	0.12823654	0.0978429	0.027148738	0.079588463	0.111031844	0.003005576	0.107773316	0.063780523	0.855132502	0.108167686	0.099720394	0.226472658	0.013356178	0.05
AP5B1	-	Alu	both	0.530878883	0.097229062	0.080508497	0.149759977	0.17974044	0.157931863	0.387843855	0.089963473	0.146464647	0.23448495	0.114235031	0.096095291	0.010753505	0.110366822	0.163013585	1.20E-05	0.119118733	0.174460432	0.011486923	0.097847304	0.139390086	0.005327182	0.058652932	0.007076923	0.906529914	0.136615932	0.124567506	0.417085015	0.131419105	0.144968148	0.003956772	0.09207038	0.131929368	0.012656595	0.12106458	0.085055908	0.433991272	0.146586786	0.131153412	0.053062584	0.028363254	0.085227273
AP5B1	-	Alu	both	0.397921067	0.156848406	0.117184792	0.293615947	0.247120723	0.234067968	0.815837343	0.146676642	0.138888889	0.121977586	0.180728306	0.145014712	0.148115946	0.183479438	0.237322707	8.71E-07	0.160931406	0.250435085	0.000432643	0.146579745	0.236611223	0.004559852	0.079648131	0.009090909	0.125395724	0.218334281	0.18143959	0.223192911	0.222124318	0.26121379	0.000127906	0.12259588	0.212072822	0.000758206	0.195657734	0.101361491	0.157063463	0.222528308	0.193745057	0.052832374	0.038542094	0.15
AP5B1	-	Alu	both	0.411785752	0.416520915	0.368712951	4.49E-06	0.527239798	0.489945317	0.204069557	0.385578199	0.574074074	6.40E-06	0.457588257	0.328170787	0.03354189	0.456660895	0.533034547	0.00155347	0.42856731	0.552077553	0.050257219	0.40147233	0.513568025	3.41E-06	0.228912096	0.012	1.41E-07	0.519961422	0.395041267	0.0037563	0.549532177	0.479349799	0.008152983	0.371327346	0.493217587	2.68E-05	0.418294369	0.178762904	2.53E-05	0.538287917	0.467454197	0.41332088	0.059764378	0.107142857
CPT1A	-	Alu	no-conserve	0.010758643	0.059928537	0.037146769	4.52E-17	0.100281656	0.047582428	0.262084583	0.068620305	0.039321086	4.74E-06	0.065115596	0.034245052	1.54E-10	0.022892484	0.046534042	2.23E-05	0.062655716	0.044996166	0.002657721	0.036884261	0.046816073	0.260602716	0.134208032	0.104545522	0.025095117	0.081588524	0.05902536	0.938534629	0.061561639	0.055790241	0.616574774	0.041020341	0.03994775	0.000132209	0.066503702	0.037358063	0.893810832	0.048688161	0.048456505	0.4775319	0.048156173	0.027720226
CPT1A	-	Alu	no-conserve	0.00016499	0.018185624	0.042771507	0.601292002	0.019884893	0.021478321	0.023755948	0.016204756	0.064246804	0.00452111	0.01516134	0.007422663	0.000599209	0.016904041	0.028022031	0.494888934	0.027752002	0.024333305	0.00604463	0.018235554	0.025294908	0.901545188	0.021368919	0.020195356	0.12006897	0.020231153	0.024090111	0.017245817	0.01454146	0.021401764	0.379590094	0.026710373	0.029142596	0.039888251	0.021628051	0.040169576	0.140938458	0.025170771	0.020388916	0.22513424	0.016440804	0.034456678
CPT1A	-	Alu	no-conserve	6.25E-06	0.011937525	0.053511565	0.000121875	0.011976222	0.021546629	0.002403047	0.008537393	0.048298309	0.856294788	0.007663344	0.009414387	6.67E-05	0.007038754	0.013447227	0.008640953	0.021136342	0.012861723	0.098171355	0.010823706	0.010134782	0.41836032	0.010565944	0.010414221	2.61E-07	0.011187652	0.028898201	2.06E-05	0.011856132	0.02750115	0.017098111	0.011797113	0.014622203	0.061445752	0.011660279	0.032481512	0.29153882	0.018102328	0.014761381	0.009558957	0.008627484	0.050252525
CPT1A	-	Alu	no-conserve	0.378912485	0.017916255	0.020091404	5.14E-05	0.029863735	0.016679663	0.404519721	0.021872255	0.027740121	0.001493848	0.020799335	0.009232435	0.001610422	0.009131478	0.016260568	0.550290063	0.023052514	0.021321049	0.00733528	0.016633729	0.021965859	0.70360029	0.057879595	0.05198089	0.485351874	0.025765891	0.021462239	0.841452037	0.021718118	0.020510331	0.509246883	0.015720978	0.015514867	0.07220562	0.027631832	0.019511505	0.844474006	0.018248307	0.016265589	0.622288136	0.018176163	0.017779766
CPT1A	-	Alu	no-conserve	0.737286238	0.147622894	0.133889512	3.16E-13	0.179189768	0.106312957	0.421917284	0.167722065	0.199675808	4.95E-06	0.152460998	0.09083127	1.06E-08	0.091561621	0.160250062	0.625789942	0.16143125	0.164147064	6.12E-06	0.112151093	0.159800928	0.11847924	0.309377719	0.330822295	0.070917778	0.166045932	0.141290716	0.436292228	0.152215516	0.161652277	0.608158069	0.111629351	0.113424197	0.094905286	0.18360163	0.159629198	0.273422554	0.119172874	0.105360918	0.156891918	0.091833711	0.148348578
CPT1A	-	Alu	no-conserve	0.939267243	0.052472137	0.051508719	2.22E-10	0.079696491	0.035909512	0.281167601	0.05911785	0.06797914	9.25E-05	0.053599794	0.021273758	2.90E-10	0.018568399	0.048263269	0.025683805	0.066595097	0.05086207	0.000108892	0.029140582	0.046766678	0.725633	0.166116608	0.155939792	0.941459239	0.068576183	0.054731465	0.476814192	0.051175392	0.054136202	0.353701827	0.03394283	0.029086913	0.435196624	0.063156912	0.056626008	0.045750711	0.036733594	0.025451891	0.704757624	0.034685558	0.024122807
CPT1A	-	Alu	no-conserve	0.953550663	0.051255194	0.049847286	0.007050524	0.0522235	0.036911863	0.801846898	0.047566504	0.045297117	0.883931676	0.040663763	0.039126044	0.107542552	0.052344102	0.057942938	0.044923307	0.047339509	0.056409106	0.908692053	0.050462714	0.047725448	0.40843948	0.058100947	0.063177892	0.144182185	0.048915782	0.055154524	0.305070246	0.039235609	0.043300914	0.742079443	0.058183428	0.055056988	0.816875462	0.062786666	0.059046663	0.853439494	0.052115892	0.05231066	0.858475733	0.039170125	0.032962618
CPT1A	-	Alu	no-conserve	0.000744911	0.578910276	0.477906036	4.06E-18	0.564680574	0.453575156	0.251555294	0.572707167	0.519783966	1.88E-13	0.601004805	0.451882408	1.86E-05	0.479991104	0.558163034	0.013378241	0.539759465	0.522562526	0.086265953	0.532289945	0.557326299	0.131091557	0.699069676	0.728234398	4.85E-10	0.581815222	0.494239906	0.053893155	0.567208409	0.518403652	0.240451789	0.565985679	0.55444369	0.00465264	0.373079806	0.282940713	9.70E-05	0.558309921	0.515312249	0.411441246	0.172522022	0.127135547
CPT1A	-	Alu	no-conserve	0.859079795	0.015082028	0.013789991	1.44E-06	0.020271187	0.010433286	0.705606624	0.016194951	0.008469791	0.287268002	0.015273217	0.012711751	0.014296809	0.009824878	0.01369545	0.002214947	0.015774343	0.009658718	0.040498275	0.011925998	0.013896146	0.878321742	0.027344974	0.024819545	0.758113043	0.018468521	0.016912484	0.026539941	0.012806482	0.018681115	0.461856697	0.014127868	0.014879028	0.006610095	0.021688462	0.011210814	0.124161857	0.015279347	0.010041367	0.198840902	0.014162322	0
CPT1A	-	Alu	no-conserve	0.046314693	0.023640637	0.014167479	0.134935405	0.02796718	0.024924272	0.854424822	0.021187593	0.018846828	0.013436852	0.021152245	0.013958861	0.56932542	0.014357445	0.01324536	0.002599789	0.020945092	0.012867875	0.705780394	0.017485696	0.014616064	0.05225194	0.03027112	0.022866369	0.885292687	0.026704253	0.02593429	0.933177125	0.021229668	0.01989624	0.507054809	0.020146303	0.020114009	0.160870216	0.025701989	0.020134237	0.333923683	0.023625402	0.018224017	0.129536864	0.020002342	0
CPT1A	-	Alu	no-conserve	0.319124351	0.016848199	0.011121126	0.003339415	0.022247407	0.015279897	0.194183289	0.017263068	0.02389111	0.153706386	0.016545408	0.01198141	0.106574452	0.01186077	0.014980544	0.636264075	0.01575041	0.012840495	0.97954718	0.014142736	0.012727599	0.471762227	0.024880901	0.021770459	0.91509468	0.018365748	0.016896048	0.02834148	0.013697846	0.021968837	0.062789529	0.0161077	0.012033213	0.027962852	0.022487243	0.015339668	0.647521231	0.017575665	0.013978144	0.336434582	0.019010286	0.042982456
CPT1A	-	Alu	no-conserve	0.632592585	0.010262453	0.007219105	0.022945476	0.012691241	0.009131908	0.907448422	0.012770039	0.007849888	0.046564404	0.01134924	0.006493324	0.084443133	0.012745888	0.010407235	0.287724751	0.011950125	0.012199563	0.054221552	0.011774283	0.013457982	0.494352324	0.018842219	0.017555969	0.547630799	0.011442506	0.013129614	0.332846697	0.010691979	0.006430406	0.95180976	0.010362367	0.009432836	0.044019347	0.014904127	0.009543974	0.608477794	0.011366787	0.008996403	0.214928729	0.011609655	0
CPT1A	-	Alu	no-conserve	0.455540671	0.01489932	0.010709129	0.002859349	0.018053876	0.01167626	0.807434954	0.017609789	0.013647489	0.007111498	0.01773657	0.008485232	0.245915246	0.016597857	0.013800985	0.587853243	0.017706342	0.014360287	0.069739552	0.015945971	0.020144252	0.400747404	0.027558335	0.024126192	0.920450764	0.016342334	0.014994685	0.561378594	0.015706929	0.016753412	0.821324346	0.017248939	0.01698436	0.129980497	0.022700774	0.016461091	0.150436396	0.015863119	0.011172878	0.148488851	0.017713083	0
CPT1A	-	Alu	no-conserve	0.984477958	0.014377914	0.012093552	0.003112099	0.014368183	0.009844058	0.745074389	0.013738765	0.017884783	0.857228396	0.012888512	0.012946179	0.280011916	0.01879242	0.016414938	0.900174963	0.014773552	0.014559852	0.058939806	0.014810953	0.018043722	0.145967112	0.018103751	0.019611751	0.484291193	0.015958296	0.016791069	0.18120314	0.012605466	0.014670539	0.046559188	0.016346252	0.012934342	0.526635588	0.013286323	0.015223571	0.851945612	0.01551267	0.012633553	0.989217282	0.013410158	0.016666667
CPT1A	-	Alu	no-conserve	0.122170664	0.119455037	0.147905912	0.027484502	0.146257946	0.128763346	0.742595731	0.121539745	0.107897681	0.02996504	0.126878575	0.100718291	8.80E-07	0.087840242	0.125751182	0.028809921	0.13248511	0.11517556	0.039691287	0.105578795	0.118771623	0.682619141	0.17390916	0.16696437	0.553130298	0.123189858	0.126075724	0.577933294	0.129072521	0.140350979	0.954464241	0.121825748	0.11941837	0.339907991	0.108246367	0.098041928	0.070430679	0.129997881	0.112935305	0.55313724	0.094879983	0.068452381
CPT1A	-	Alu	no-conserve	0.066452346	0.08051358	0.118745473	0.001991347	0.090661508	0.074366325	0.776916983	0.075954431	0.078839569	0.661812694	0.072736682	0.068259937	6.84E-07	0.052815262	0.089851229	0.128186525	0.079919603	0.071286726	0.00038442	0.058392596	0.083121167	0.36882275	0.124257443	0.128113515	0.381625816	0.075485682	0.083994492	0.491550291	0.077112345	0.080649791	0.113708036	0.068975089	0.077163367	0.631447926	0.066640669	0.073177126	0.164044871	0.074896166	0.062803234	0.032926617	0.050751951	0.119476576
CPT1A	-	Alu	no-conserve	0.469792659	0.257940773	0.232785776	2.05E-06	0.284819573	0.225043597	0.947594411	0.258257239	0.253282088	0.002829019	0.248920392	0.180440521	2.36E-05	0.215494887	0.280746354	0.29222345	0.279379637	0.264663782	0.02280109	0.230397945	0.269100526	0.345954909	0.435628965	0.414473687	0.288530922	0.249069111	0.228220163	0.098233593	0.269748161	0.205130504	0.822602542	0.253079764	0.248080884	0.001919155	0.255811403	0.184901237	2.31E-05	0.249757678	0.18368307	0.492571642	0.194299607	0.145353303
CPT1A	-	Alu	no-conserve	0.790606838	0.073132981	0.056148993	3.48E-06	0.081882779	0.047356624	0.668876496	0.073194391	0.046955624	0.02227807	0.069946658	0.042570045	0.001525715	0.047844774	0.06980503	0.038391033	0.07272979	0.082548174	0.000311473	0.058192965	0.086406769	0.918146529	0.184212248	0.172162277	0.508773802	0.073973195	0.060249461	0.699085536	0.076745587	0.077095395	0.813397034	0.061810133	0.060533558	0.018320661	0.07827796	0.056959105	0.904156847	0.056503077	0.050540341	0.12360035	0.052214613	0.014705882
CPT1A	-	Alu	chimp	8.60E-05	0.04651523	0.169841856	2.32E-15	0.048537953	0.07941456	0.003431	0.029218345	0.193233943	0.928505751	0.028482789	0.02744474	3.04E-08	0.019007943	0.043583245	5.65E-13	0.085225727	0.043386893	0.219111896	0.035829321	0.034353874	0.934643603	0.047452731	0.042232834	5.55E-09	0.05015792	0.089169935	1.35E-09	0.031829582	0.117095916	0.020896112	0.05226075	0.059915924	0.946489694	0.039489099	0.077529302	1.04E-06	0.071896437	0.044959336	0.002641478	0.032607202	0.121324702
CPT1A	-	Alu	chimp	0.729271728	0.096342383	0.085816029	5.92E-15	0.121497724	0.061362914	0.828056612	0.098827805	0.073264698	1.55E-07	0.093438738	0.042272279	4.20E-06	0.037139798	0.057728516	3.21E-10	0.086652899	0.05187589	0.081239392	0.053363627	0.058517047	0.906009851	0.187806605	0.171742106	0.01656043	0.099765168	0.074512884	0.166714712	0.064922621	0.074829694	0.078019295	0.058822835	0.049053256	0.006476696	0.135425407	0.084330304	5.78E-05	0.06562976	0.046398483	0.571285224	0.108674734	0.081557539
CPT1A	-	Alu	rhesus	0.022767208	0.046506697	0.022407172	2.83E-20	0.064055776	0.020225659	0.757679432	0.052670733	0.055309814	3.69E-07	0.056112117	0.02015627	1.08E-07	0.014017094	0.027401145	0.001103535	0.044602078	0.031907872	0.001359106	0.026950159	0.035746349	0.748719614	0.120483365	0.104686459	0.034640786	0.052447322	0.035877382	0.861323099	0.050319087	0.048677413	0.894178538	0.025770962	0.024708267	0.062621132	0.056676584	0.036272674	0.143929276	0.032371496	0.027357122	0.72046237	0.040717759	0.049850657
CPT1A	-	Alu	no-conserve	8.33E-05	0.036431438	0.00794123	6.58E-18	0.049914238	0.013353132	0.275834935	0.040272641	0.013920696	6.96E-08	0.042077746	0.012236541	1.32E-06	0.010301685	0.021358444	0.014496882	0.035810836	0.026232623	0.010613061	0.019965889	0.025672467	0.742921836	0.114990672	0.096468159	0.534194832	0.039534497	0.02938168	0.906207325	0.036447354	0.041143123	0.601943435	0.018909351	0.016085347	0.405478305	0.045039376	0.034814031	0.774677234	0.019864664	0.018572368	0.343026834	0.02610843	0.00862069
CPT1A	-	Alu	no-conserve	0.000986319	0.020333967	0.004675745	2.61E-09	0.025038682	0.009971978	0.979611369	0.022665502	0.015173071	0.002302632	0.024870975	0.013111488	0.325826591	0.012969506	0.014752785	0.141303401	0.022344487	0.016892157	0.079457376	0.014153261	0.017616154	0.889565766	0.046459982	0.044461159	0.034187437	0.025824105	0.01625113	0.53154932	0.018411154	0.018688753	0.474879763	0.016736777	0.017464216	0.399851735	0.022525126	0.020664948	0.005340416	0.01554774	0.022751517	0.813126285	0.014042665	0.010869565
CPT1A	-	Alu	chimp	0.318513876	0.022981705	0.012829123	2.14E-08	0.033172271	0.010921698	0.813425724	0.023700212	0.009457672	0.004682602	0.025227389	0.00922768	0.001850028	0.005813652	0.010168471	0.736382308	0.019463921	0.015986562	0.001109342	0.011022056	0.014984064	0.008914165	0.05844389	0.02819211	0.066230171	0.02665867	0.014664275	0.375899382	0.019921002	0.019413332	0.557106649	0.013656562	0.009845424	0.089408065	0.042810264	0.030246609	0.529187954	0.013947267	0.009479246	0.346919988	0.021592155	0.031596272
CPT1A	-	Alu	chimp	0.000134952	0.243378373	0.130152163	5.14E-29	0.279378136	0.146453293	0.327104627	0.2698183	0.202620646	1.53E-11	0.304441553	0.168848715	2.96E-07	0.137088246	0.206535921	0.424400294	0.265046952	0.253669769	0.000152477	0.194563641	0.24352862	0.043908386	0.419536978	0.469933464	0.00285153	0.256717434	0.20873544	0.797158411	0.252805222	0.265587226	0.933416788	0.203691986	0.19839452	0.00037213	0.329999236	0.259727504	0.003182501	0.207399137	0.172027445	0.59971735	0.169727915	0.17697318
CPT1A	-	Alu	chimp	0.015772496	0.081564548	0.042240966	2.22E-20	0.111803443	0.04570982	0.12057586	0.091367192	0.037621135	2.58E-08	0.105588222	0.047540419	2.66E-05	0.038849678	0.062232625	0.317551232	0.097420642	0.088643975	0.000589927	0.058589698	0.081017777	0.269500524	0.20322488	0.2145973	0.112262536	0.089351743	0.069205587	0.239245124	0.089338715	0.106041514	0.502734976	0.06107791	0.054573121	0.012334979	0.102535752	0.077719783	0.058170207	0.064194152	0.04888379	0.59735018	0.04924468	0.055212202
CPT1A	-	Alu	chimp	0.356056105	0.13430329	0.113285187	1.97E-20	0.166177508	0.089517124	0.987909273	0.12875016	0.123688028	2.10E-08	0.197049163	0.110138983	9.13E-06	0.064913446	0.092523848	3.78E-05	0.127781697	0.099686215	0.101402442	0.093486323	0.099350186	0.219133933	0.238757623	0.253177558	0.051567644	0.139001486	0.115835332	0.570514499	0.118881243	0.126366162	0.240452154	0.101737706	0.091576664	0.03622896	0.1627263	0.136941669	0.005642458	0.10376107	0.080428216	0.584674502	0.161494083	0.142293589
CPT1A	-	Alu	no-conserve	4.56E-06	0.013039184	0.075180744	4.00E-08	0.012890941	0.024186253	0.069510215	0.006973911	0.038924134	0.758099735	0.009282233	0.008267014	0.002394511	0.006140346	0.010425288	0.050257444	0.021885556	0.01314638	0.003559662	0.009213459	0.011117191	0.649984815	0.009541641	0.007991186	0.006818207	0.011374872	0.022965663	4.19E-08	0.008343306	0.032314966	0.073401294	0.018899092	0.021593238	0.005740987	0.019849485	0.060747931	0.207044515	0.021913766	0.016339661	0.405744533	0.010419295	0.01724138
CPT1A	-	Alu	chimp	0.373245774	0.222516947	0.20213214	2.84E-08	0.29416608	0.230355007	0.619984823	0.195246403	0.216061828	0.135854379	0.235928883	0.203535154	0.016366402	0.185343448	0.214654115	0.212424628	0.239824686	0.229114128	0.007118019	0.197924003	0.232230893	0.339861651	0.351971481	0.334099824	0.436036153	0.219418378	0.209226467	1	0.250249342	0.256856157	0.000922104	0.211971243	0.250341224	0.982442637	0.26351254	0.279840672	0.433324008	0.214493284	0.205710762	0.437864786	0.176600255	0.208262504
CPT1A	-	Alu	no-conserve	0.843541587	0.074106203	0.070849415	6.75E-06	0.101252293	0.067784956	0.898321024	0.065957634	0.050291481	0.242879948	0.070458057	0.055442913	0.348218459	0.071266316	0.077999014	0.931918795	0.085498679	0.082022717	0.081500442	0.072168258	0.07911277	0.207366737	0.124365158	0.107654279	0.668164019	0.080172005	0.080606378	0.846074994	0.074091419	0.074691374	0.100693397	0.072272566	0.08047164	0.195823113	0.077729721	0.093912832	0.961970795	0.075332721	0.070247822	0.11303078	0.053503852	0.083987193
CPT1A	-	Alu	chimp	0.828812702	0.049796412	0.041013178	3.39E-10	0.061281814	0.029792281	0.287612574	0.043063293	0.016339869	0.000836667	0.042622267	0.021370155	0.521972046	0.028685407	0.03062509	2.96E-05	0.04962306	0.02992926	0.129002805	0.030561077	0.032071794	0.190196144	0.084124609	0.071117269	0.763784506	0.049277734	0.04455917	0.844888693	0.053991946	0.052385534	0.44922305	0.037145768	0.038555085	0.715229669	0.035764338	0.0359945	0.428122159	0.039420974	0.031027032	0.769642786	0.029483129	0.034143519
CPT1A	-	Alu	chimp	0.035228025	0.094434381	0.169725059	1.68E-10	0.131383823	0.069129969	0.734615053	0.087451685	0.085997047	9.61E-07	0.102174058	0.040258881	2.01E-06	0.033082217	0.058604421	2.26E-09	0.118264308	0.076767798	0.03801051	0.060748324	0.070153446	0.536052366	0.208576861	0.180874058	0.04789737	0.106100673	0.117789147	0.001335868	0.09897816	0.148754957	0.315187123	0.067133392	0.06848068	0.023705828	0.084895842	0.071174843	0.205114185	0.076358729	0.06348433	0.083359245	0.04719543	0.084417421
CPT1A	-	Alu	chimp	0.056936471	0.032431629	0.013329022	1.21E-11	0.049497323	0.019761599	0.335926275	0.030844313	0.011347723	0.007049015	0.036083554	0.019339764	0.007358764	0.012282346	0.019563619	0.108529724	0.034530399	0.027694226	0.065305989	0.021001955	0.023196293	0.212203112	0.082371501	0.063604668	0.576968172	0.035714307	0.030821053	0.101085062	0.029612992	0.036716362	0.406414963	0.02202543	0.017519283	0.03122943	0.022439045	0.013746334	0.848342578	0.021492792	0.025893023	0.520381337	0.021063499	0.009615385
CPT1A	-	Alu	chimp	0.004425935	0.114904305	0.072122684	3.15E-08	0.12365098	0.092293491	0.645614064	0.114125435	0.09977147	0.014147477	0.124983907	0.099031537	7.46E-05	0.106956552	0.137296834	0.025537484	0.120222144	0.132320719	0.002422696	0.106935986	0.135894613	0.171059477	0.18504479	0.203017479	0.304311251	0.117020598	0.105170544	0.097658346	0.116065023	0.098356995	0.352753946	0.120099539	0.107545858	0.000304255	0.121993518	0.078443972	0.581777291	0.100145424	0.103398052	0.601432151	0.093967572	0.129486646
CPT1A	-	Alu	chimp	0.000992447	0.269408474	0.17261251	1.11E-14	0.281925942	0.212945341	0.083135764	0.289424063	0.188782369	1.14E-08	0.317682282	0.217254582	0.000317096	0.222030445	0.268461258	0.637380892	0.288833209	0.286190895	0.007411808	0.248625534	0.291513264	0.286944138	0.428150526	0.443476665	0.028966986	0.265545649	0.229504309	0.143904901	0.2827416	0.249033033	0.183273411	0.259522856	0.248730844	0.006747807	0.28973387	0.211020222	0.344206695	0.224139146	0.238050949	0.370657146	0.207942154	0.17226614
CPT1A	-	Alu	no-conserve	0.800912991	0.012057895	0.014097273	4.88E-11	0.01799037	0.006926393	0.068514936	0.011368741	0.038905829	0.176173446	0.013362362	0.007841478	0.000735793	0.006797104	0.012588125	0.555338045	0.013906827	0.011658364	0.119669489	0.009068905	0.008939949	0.450429093	0.021758304	0.02373937	0.294290138	0.015391397	0.011323544	0.005753638	0.012814769	0.022379548	0.750571537	0.010096068	0.008316735	0.008877222	0.012436772	0.005300567	0.924392864	0.010408801	0.010273216	0.802602756	0.008368531	0.008928572
CPT1A	-	Alu	no-conserve	0.816238514	0.043540358	0.043526392	2.39E-14	0.067796936	0.028099798	0.77659312	0.044066303	0.038818391	0.000463443	0.042193424	0.022963834	7.90E-06	0.022393683	0.037027982	0.15508306	0.047153604	0.039992464	0.043991814	0.028925338	0.03505158	0.788811321	0.111891135	0.088825894	0.258163449	0.052919091	0.040556306	0.964688875	0.041573975	0.043571262	0.005857017	0.029776559	0.040126395	0.82322837	0.02651924	0.028987829	0.266606267	0.03615062	0.032103533	0.225314574	0.026460161	0.0871159
CPT1A	-	Alu	both	0.000112774	0.579395878	0.480449437	1.03E-21	0.587008334	0.482138726	0.903508877	0.575123179	0.57815662	7.76E-08	0.566446093	0.464898093	0.001308359	0.535241996	0.579066709	0.029725882	0.564162042	0.590385106	0.568484669	0.58621555	0.596376389	0.970348506	0.708036644	0.724353044	8.98E-05	0.576258042	0.522258823	0.093328286	0.543283673	0.504084573	0.283862384	0.602444827	0.588883251	0.014243256	0.577291514	0.519146506	0.001142503	0.568572474	0.537876579	0.836027805	0.521338142	0.604121965
CPT1A	-	Alu	chimp	0.81862766	0.093335845	0.086583029	0.006595238	0.132189469	0.112387724	0.041189561	0.091344477	0.152350053	0.013333755	0.096780712	0.070569524	6.69E-07	0.064777742	0.093718639	0.071847677	0.120386979	0.106287728	0.056139857	0.088690507	0.099476244	0.758684616	0.165279977	0.166332698	0.743908859	0.103016554	0.107302566	0.6943516	0.100319036	0.103071007	0.222181004	0.099482541	0.1052486	0.67063251	0.068586438	0.078470002	0.069521164	0.098071979	0.08494572	0.019456366	0.060267885	0.14016794
CPT1A	-	Alu	chimp	0.072567388	0.516939292	0.45477475	1.58E-28	0.578719052	0.420028449	0.704797511	0.495987697	0.538334595	1.39E-10	0.491505816	0.32644583	5.20E-06	0.329894919	0.415861675	8.25E-09	0.505798126	0.440586461	0.921919405	0.442430884	0.435498002	0.483435016	0.658341789	0.663426847	2.94E-07	0.551297945	0.468581369	0.520476082	0.470630607	0.466605061	0.198967876	0.476897507	0.457169187	0.000225936	0.518989547	0.441969178	2.14E-08	0.480276049	0.403201637	0.952237714	0.439578014	0.474141604
CPT1A	-	Alu	no-conserve	0.620185584	0.056339328	0.062299854	1.11E-15	0.077748625	0.032811481	0.615133591	0.04303686	0.0801094	1.96E-05	0.047389452	0.020230109	1.29E-06	0.019377721	0.035898321	0.000231905	0.049864434	0.035824758	0.039882138	0.029297925	0.036347516	0.655535971	0.083698831	0.073307828	0.619416591	0.061407315	0.057883269	0.002563341	0.03755788	0.05500392	0.507587471	0.035853032	0.040317653	0.42903025	0.0316789	0.041036022	0.340821691	0.040313212	0.031366197	0.324414768	0.028409317	0.04248366
CPT1A	-	Alu	both	0.748027613	0.034483275	0.027754179	4.80E-07	0.058987853	0.026811168	0.329290657	0.039898106	0.081861721	0.048790968	0.03765074	0.026060712	0.018833586	0.012159738	0.020802911	0.441330238	0.03960864	0.033322072	0.004498993	0.023421622	0.029390318	0.15128176	0.112614827	0.112893723	0.731719756	0.04500018	0.039922114	0.050389354	0.034253049	0.046660366	0.4862739	0.027884412	0.0274965	0.063603115	0.039855634	0.030294456	0.336825097	0.026568848	0.025280279	0.229674361	0.036620287	0.062139038
CPT1A	-	Alu	both	0.203217963	0.096728754	0.07383827	3.92E-15	0.142164562	0.07357846	0.296999928	0.095333043	0.056721057	0.001031506	0.098703246	0.059014875	1.73E-08	0.043931139	0.078530506	0.042293988	0.099810438	0.087564813	0.033274555	0.075919922	0.090567971	0.1734574	0.192533535	0.201122091	0.191772164	0.101854783	0.083640611	0.742254562	0.100007656	0.09125533	0.431814493	0.071134299	0.074065471	0.001538208	0.14822656	0.100543524	0.484235725	0.072193226	0.07321383	0.520797099	0.1131824	0.077458017
CPT1A	-	Alu	both	0.016706538	0.045947958	0.142081889	0.604334571	0.056481849	0.056397632	0.008123681	0.041718295	0.141160909	0.712894332	0.039472883	0.032113904	5.59E-06	0.016873786	0.034210157	0.00078564	0.064631339	0.044904894	0.005173846	0.030589182	0.040963638	0.600209437	0.082308144	0.075307897	0.00129166	0.05138939	0.071815745	0.000241233	0.040085924	0.082270154	0.109008944	0.040882524	0.047884442	0.13720687	0.050756181	0.091979835	0.576151915	0.050350616	0.04179303	0.785295903	0.039462112	0.039014821
CPT1A	-	Alu	both	0.162383861	0.238350576	0.180763902	4.59E-22	0.276197416	0.147968442	0.352522031	0.250176626	0.187928515	9.65E-07	0.235226226	0.133733267	1.56E-08	0.123326586	0.199261067	0.919367907	0.218515529	0.217762605	0.000542028	0.181965997	0.229392411	0.671425956	0.463261335	0.45474835	3.07E-05	0.26138481	0.181271364	0.584285727	0.206752979	0.186417059	0.416073818	0.17675827	0.160512405	0.000551137	0.273834881	0.197235507	0.149309228	0.17680842	0.156217838	0.245900589	0.225104524	0.13046644
CPT1A	-	Alu	both	0.002019032	0.048338832	0.137600155	0.080018562	0.06029077	0.067123344	0.010804039	0.045035757	0.120697465	0.050413344	0.043924065	0.031571904	2.10E-06	0.029405386	0.056843282	5.28E-05	0.071658526	0.050080688	0.000724485	0.040069682	0.056361094	0.684993096	0.092653828	0.081875718	0.012165567	0.055344489	0.068669366	2.73E-05	0.045779157	0.0798813	0.071328739	0.054113472	0.065888583	0.593145166	0.056106666	0.077089332	0.003781581	0.062693742	0.041823815	0.108163566	0.041484136	0.096181964
CPT1A	-	Alu	chimp	0.195381704	0.250690155	0.317992168	0.003911673	0.271337623	0.235934883	0.151319298	0.212317615	0.310841498	0.000503265	0.217197646	0.152056078	7.30E-08	0.151199094	0.249625457	1.78E-08	0.2655952	0.206797825	0.021420056	0.198465867	0.234007743	0.746235077	0.397839052	0.379867095	0.685433216	0.250828461	0.237705198	0.011166669	0.204733129	0.260716632	0.415391265	0.22597563	0.235051813	0.659852409	0.278612944	0.266552394	0.002284232	0.226605758	0.184869443	0.900340089	0.237226163	0.235141988
CPT1A	-	Alu	chimp	0.064129923	0.496479744	0.456820237	1.37E-12	0.610175809	0.526274602	0.707523505	0.541153089	0.564232804	0.002373928	0.532334172	0.490006425	1.49E-10	0.458375828	0.64879856	0.016836823	0.563101428	0.640060396	0.009516719	0.536340591	0.652050165	0.00288531	0.700956214	0.811414196	0.128398215	0.510529038	0.542032361	0.868565687	0.546277693	0.603843063	0.302857126	0.592502904	0.624790084	0.010298332	0.604995048	0.505225832	0.135655806	0.505628791	0.610182128	0.347283856	0.33385442	0.482721957
CPT1A	-	no-repetitive	no-conserve	0.048365141	0.040923572	0.015758036	3.88E-21	0.052411505	0.014770335	0.657480037	0.029804504	0.016180156	0.000821588	0.023531903	0.010397698	0.025050976	0.011539291	0.017388802	0.001740973	0.029448272	0.019169532	0.698260004	0.018917969	0.01612499	0.084054994	0.059763906	0.040953019	7.14E-07	0.040927266	0.013276321	0.169106467	0.033411414	0.025110178	0.751545815	0.02095271	0.01777671	0.000111147	0.027711103	0.013309325	0.036948952	0.024129999	0.014686312	0.990697353	0.026944743	0.01438083
CPT1A	-	no-repetitive	chimp	0.050957038	0.064959076	0.023088614	9.48E-21	0.06847877	0.016774414	0.297419094	0.048432009	0.015640274	3.55E-08	0.045652864	0.009715246	0.000628047	0.011954814	0.021811061	1.73E-05	0.041587685	0.019732586	0.123085291	0.022639195	0.021953457	0.428407215	0.087408228	0.073290086	1.35E-05	0.062718542	0.025279528	0.078147447	0.048210867	0.031500661	0.552283927	0.032717119	0.028783781	5.16E-07	0.043969495	0.015860943	0.017944213	0.029523717	0.013441719	0.495688599	0.029459309	0.004807692
ORAOV1	-	Alu	rhesus	0.570850075	0.017023483	0.026027878	0.000728608	0.014492993	0.029860039	0.083407507	0.01823083	0.038690476	0.003924651	0.016642881	0.00856293	0.57862015	0.025064276	0.021606084	0.184039444	0.015014963	0.014108732	0.024099902	0.020269557	0.032335254	0.252803978	0.013360311	0.012704909	0.050337962	0.016636231	0.01277041	0.704601361	0.018292271	0.01928081	0.454240556	0.023416922	0.024527147	0.88117356	0.021840338	0.031885717	0.147226919	0.01646896	0.020042515	0.316314321	0.016204744	0
KCNE3	-	Alu	no-conserve	0.006573539	0.081952447	0.003508772	0.009855085	0.059112094	0.076701627	0.858075369	0.099538457	0.081939799	0.486665692	0.060104586	0.076313406	0.030310761	0.226040369	0.286147416	0.961036224	0.23634361	0.234880038	0.001467966	0.184557603	0.284063011	8.77E-05	0.081066095	0.018	0.107861838	0.158787294	0.187076966	0.166271842	0.183815354	0.219212113	8.06E-09	0.046013774	0.133591413	0.001098637	0.174782706	0.115693332	0.58493038	0.154529371	0.142493965	0.755062578	0.051578897	0.025
KCNE3	-	Alu	no-conserve	0.045471754	0.167122219	0.04048583	0.032977933	0.119964597	0.155986747	0.16051602	0.214860925	0.470238095	0.506054815	0.118216964	0.130719132	0.967821927	0.461158353	0.542036605	2.40E-10	0.623120671	0.451890772	0.098577229	0.386666316	0.508165523	0.000111835	0.159533129	0	0.694080289	0.334074435	0.365935083	0.707558203	0.426302517	0.508009728	4.01E-07	0.089881992	0.263430598	0.003418603	0.495450249	0.363333688	0.478560929	0.326801418	0.304391672	0.748189357	0.177537991	0.136363636
KCNE3	-	Alu	no-conserve	0.181921221	0.100593898	0.055297334	5.51E-05	0.098468261	0.165507459	0.054632908	0.148240434	0.353535353	0.417732282	0.091702378	0.104131649	0.000248426	0.222184285	0.415683553	0.07684389	0.417518782	0.383545738	0.006983854	0.302687603	0.408774885	5.07E-05	0.107963098	0	0.928866882	0.252793745	0.249449136	0.731959233	0.320178803	0.351008723	1.33E-09	0.069376843	0.220044337	0.000145447	0.385253654	0.219698132	0.174570302	0.238412784	0.202275769	0.784984713	0.113446213	0.090909091
KCNE3	-	Alu	no-conserve	0.140072922	0.082404142	0.028867624	7.49E-05	0.069633267	0.127276563	0.013952902	0.113324747	0.363636364	0.269897109	0.073191237	0.087471305	2.06E-05	0.18499348	0.363935638	0.000446008	0.284849277	0.331820245	0.009374661	0.248460626	0.338809143	5.07E-05	0.082153626	0	0.616532106	0.191700321	0.203110327	0.852454963	0.255345245	0.270230563	2.75E-08	0.049663519	0.143798746	1.18E-05	0.309957489	0.159853769	0.778522381	0.168532677	0.162362339	0.85944905	0.093713921	0.090909091
KCNE3	-	Alu	no-conserve	0.131597056	0.031749431	0.017824044	0.916715712	0.025979053	0.020560523	0.011064467	0.031395655	0.156898657	0.881646404	0.031976416	0.029715291	0.102902387	0.037916229	0.049409303	0.142375733	0.061085878	0.054266198	0.492472061	0.052567958	0.049718405	0.001942534	0.03205443	0.0086337	0.500280514	0.046911975	0.046685649	0.989643891	0.047506411	0.042756456	5.31E-09	0.016500981	0.047580785	0.001609242	0.068168446	0.04249868	0.956036859	0.049047616	0.053288693	0.881393669	0.025393246	0.019230769
KCNE3	-	Alu	no-conserve	0.750033117	0.085953657	0.079141402	0.109862777	0.102724873	0.104327689	0.397041826	0.120994231	0.196969697	0.34138631	0.066805192	0.08344505	0.222917568	0.184807748	0.239359253	0.346048074	0.247310164	0.23463318	0.385218516	0.153616078	0.169929649	1.72E-05	0.104776732	0.004615385	0.968597582	0.223587837	0.213807924	0.972135658	0.192210818	0.177829738	1.74E-13	0.04722083	0.162076595	1.27E-08	0.334335892	0.117066841	0.975258765	0.153268732	0.150153035	0.316328851	0.044747369	0
KCNE3	-	Alu	no-conserve	0.135946448	0.138678093	0.064470617	0.658325717	0.168688109	0.167258774	0.314204816	0.168608824	0.301587301	0.950616664	0.108151618	0.101076266	0.140766851	0.378745094	0.461909082	0.798178191	0.422701153	0.413312122	7.44E-05	0.315739718	0.45774094	0.00039377	0.134831282	0.017272727	0.234525391	0.307499542	0.347958457	0.752881321	0.378644762	0.3860733	6.91E-10	0.079482466	0.243066006	2.49E-05	0.439694563	0.281205344	0.696855007	0.277429968	0.294670139	0.997184347	0.116212796	0.115384616
PDDC1	-	Alu	no-conserve	0.001463371	0.018103213	0.00449307	0.005743367	0.024227693	0.017337941	0.865043943	0.01400283	0.00952381	0.96007422	0.019365817	0.016843354	0.402004102	0.01795752	0.019777146	0.757384688	0.024389345	0.022900766	0.095872878	0.019966512	0.025621057	0.850517695	0.022415977	0.028716282	0.013180672	0.022088922	0.01540626	0.014103576	0.01962269	0.033769045	0.414147098	0.022439842	0.027978683	0.039803209	0.022837367	0.016805184	0.001597741	0.029684767	0.01930929	0.357340207	0.017416563	0.038510912
PDDC1	-	Alu	chimp	0.143002524	0.01516849	0.010307381	0.00191219	0.018512775	0.01382367	0.202427163	0.009184828	0	0.419944262	0.013625111	0.010056387	0.274502177	0.012343715	0.0186723	0.242014814	0.017150567	0.019169339	0.371585921	0.014612991	0.019091293	0.216899605	0.021555868	0.019674723	0.13378918	0.016715393	0.012893906	0.318722073	0.011981429	0.015356539	0.180576437	0.018877946	0.024423862	0.038882594	0.014841039	0.007958596	0.086661504	0.021306429	0.016445539	0.254727911	0.012255359	0.024127907
PDDC1	-	Alu	no-conserve	0.045746632	0.016545831	0.007290453	0.003971001	0.019827165	0.01366698	0.621838577	0.011825966	0.011575784	0.104950008	0.020118884	0.012965625	0.006817057	0.011402629	0.021359464	0.080252559	0.025416309	0.028728412	0.000413642	0.020615987	0.037821746	0.938795087	0.027326258	0.03243381	0.066287614	0.02348257	0.019171371	0.282006339	0.013950852	0.01996476	0.878354718	0.021291243	0.022897714	0.028095819	0.016754119	0.010313292	0.022791562	0.018432297	0.012210294	0.239152947	0.010495368	0
PDDC1	-	Alu	chimp	0.5743965	0.288672555	0.270425973	4.28E-13	0.336964911	0.255212949	0.754149651	0.246373649	0.339215686	0.037983379	0.295254836	0.25063382	0.000739962	0.285504755	0.351084133	0.001411994	0.361527661	0.397031377	0.161813831	0.386187615	0.410861816	0.634313203	0.377428692	0.349194504	0.789292953	0.290513046	0.272137147	0.012328305	0.262090819	0.336979534	0.840891041	0.388493275	0.389759458	0.393115377	0.283432504	0.251341503	2.49E-06	0.359672356	0.305423351	0.473820008	0.284151391	0.299172794
PDDC1	-	Alu	chimp	0.616444278	0.193036845	0.191941714	7.38E-12	0.240278911	0.165820523	0.701068665	0.164236999	0.210648148	0.001275429	0.21838933	0.15528263	3.49E-07	0.172193675	0.263281501	0.05006206	0.269227544	0.286496291	0.026201684	0.254729127	0.28966839	0.283413807	0.282739592	0.293445915	0.940338889	0.203799314	0.197300408	0.0003215	0.183235573	0.281464157	0.372087742	0.252033605	0.259562451	0.061444511	0.189068455	0.148626423	6.66E-06	0.252289075	0.205761412	0.598999777	0.175704107	0.203125
PDDC1	-	Alu	chimp	0.632547523	0.152612375	0.138035704	1.06E-07	0.196362119	0.145368313	0.697314855	0.135814273	0.124982416	0.010945525	0.171254011	0.126206518	1.46E-05	0.150084546	0.213454054	0.000396901	0.21762339	0.250196061	0.000108741	0.203789446	0.258964008	0.126320043	0.244610594	0.276588104	0.401557646	0.163330569	0.174169251	0.077573475	0.155019072	0.188117499	0.002689994	0.191913291	0.222108119	0.004149755	0.173051223	0.118187288	0.056632988	0.203259016	0.186897352	0.103559745	0.16798309	0.084099265
PDDC1	-	Alu	chimp	0.416835509	0.014351937	0.030101262	0.07733158	0.020617202	0.014554766	0.207245945	0.011298908	0.027705346	0.312452545	0.017410697	0.01114576	0.000204637	0.008238346	0.021601842	0.198412275	0.023157007	0.016934774	0.727842979	0.010068626	0.015046158	0.671544172	0.026890902	0.029641696	0.02549992	0.019240061	0.029442266	1.12E-05	0.015173615	0.034238679	0.639543208	0.014133924	0.017007396	0.449077297	0.01353728	0.026686244	0.397379511	0.01355862	0.011808362	0.344148746	0.0131223	0.023611111
PDDC1	-	Alu	chimp	0.304511754	0.023238106	0.028948944	0.172796617	0.025008829	0.021076154	0.088603562	0.019838173	0.038338375	0.104793423	0.02778306	0.022888936	0.918488095	0.025682686	0.028439549	0.072703258	0.034349533	0.041194833	0.173737418	0.02723675	0.0323583	0.343318678	0.048651623	0.049071204	0.84576397	0.025111353	0.024073122	0.325566015	0.022410076	0.029359438	0.020186488	0.024495007	0.033179347	0.005798861	0.025945206	0.012871618	0.903406142	0.025253912	0.023349686	0.358564677	0.023142734	0.007352941
PDDC1	-	Alu	chimp	0.142160896	0.090816267	0.073171738	0.004887494	0.095691638	0.079040607	0.251516303	0.078619806	0.050323339	0.001493103	0.106745411	0.072256471	0.765810299	0.112371618	0.114613861	0.00228684	0.11294926	0.1327279	0.457754157	0.126807585	0.134593087	0.010274097	0.14566085	0.116368175	0.007035384	0.08928528	0.068262469	0.525942664	0.096354793	0.081922842	0.041054022	0.117727529	0.13465258	0.065297739	0.110968154	0.083353432	0.009173141	0.124252977	0.104415847	0.216955836	0.126916122	0.070429805
PDDC1	-	Alu	chimp	0.157614129	0.376955278	0.337109066	0.002376149	0.362844619	0.322479351	0.179069636	0.35634221	0.432070298	0.001708334	0.344957755	0.280413168	0.247716081	0.32606122	0.348564618	0.382539603	0.376082111	0.392700485	0.206800901	0.366247714	0.380975156	1.31E-05	0.396906109	0.247398083	0.640311159	0.364720192	0.372217149	0.018578195	0.25449124	0.331187531	0.173006537	0.398599719	0.419929915	0.199947197	0.310009224	0.261719391	0.011342375	0.370157586	0.339412428	0.967431885	0.34467501	0.322278226
PDDC1	-	Alu	no-conserve	0.219563843	0.081098197	0.074431532	0.203047817	0.087471988	0.080442421	0.612844838	0.073312302	0.057545501	0.009320006	0.09492465	0.065326036	0.669528032	0.07263512	0.074039145	0.042762765	0.083075515	0.096399371	0.011541119	0.076141553	0.097333908	0.003115603	0.086481018	0.051603019	0.811934136	0.079933108	0.087111606	0.101827326	0.053704755	0.06411262	0.419846448	0.077517949	0.082965238	0.002926846	0.08426713	0.044214814	0.597857601	0.079637718	0.085208193	0.781907473	0.087552824	0.084586466
PDDC1	-	Alu	chimp	0.820601253	0.056277111	0.0661482	0.570422947	0.052138769	0.05071892	0.532014759	0.045693365	0.054684584	0.626718165	0.040579304	0.032013536	0.433534388	0.042505002	0.052929326	0.098470281	0.061698461	0.072398524	0.199872154	0.053820579	0.064934967	0.000538406	0.049218781	0.021049208	0.577533155	0.048098104	0.044594913	0.041778317	0.028852963	0.043030255	0.56258645	0.056244089	0.052328441	0.227235157	0.047904473	0.054553943	0.998971861	0.049518704	0.050329981	0.107928152	0.055107029	0.131114131
PDDC1	-	Alu	chimp	0.044437	0.446440136	0.364101581	0.001221932	0.458528557	0.428706872	0.069715366	0.423191624	0.568078747	0.441010614	0.403055058	0.448040516	0.153564575	0.520948515	0.553763575	1.53E-07	0.479080817	0.57593934	0.059076667	0.550053948	0.598100883	0.036431551	0.43724876	0.310706889	0.383643023	0.355164533	0.306960493	0.002583823	0.32598602	0.50303689	0.792798694	0.570101456	0.567934825	0.001563792	0.332545152	0.181822456	0.972357038	0.531716651	0.536989932	0.51950841	0.318470309	0.2375
PDDC1	-	Alu	chimp	0.320045277	0.354735288	0.326990153	4.93E-06	0.375497261	0.325422775	0.155661012	0.327377373	0.456612319	0.00440547	0.326484364	0.254467858	0.175065324	0.409026144	0.452580403	0.00298568	0.383046389	0.437913551	0.022104087	0.413850051	0.466547208	0.015786135	0.352139617	0.241512822	0.068025917	0.302196885	0.238393612	0.090545849	0.274106961	0.379651554	0.053139987	0.45147684	0.479527468	0.02051724	0.254215167	0.160114128	0.707203551	0.446033124	0.441776995	0.135789972	0.250918019	0.073529412
PDDC1	-	Alu	chimp	0.587788049	0.230259261	0.216956617	0.000120512	0.237429401	0.199004968	0.028645554	0.199446112	0.360902726	0.200128315	0.195467321	0.170388357	0.008945369	0.248037318	0.285672076	0.036201484	0.2442892	0.287957831	0.006453834	0.260208532	0.32176885	0.212707728	0.233436006	0.192611744	0.017418008	0.185921676	0.138012259	0.041797527	0.163197623	0.253968032	0.566340414	0.292309766	0.298743749	0.004015996	0.124598261	0.06872101	0.689492212	0.283245384	0.287969332	0.185666456	0.120758544	0.033333333
PDDC1	-	Alu	chimp	0.56396009	0.17194045	0.153234255	0.326228466	0.177567827	0.190399885	0.26857412	0.156369071	0.269473684	0.728717387	0.10825869	0.092621463	4.72E-05	0.211945167	0.305420157	0.001578533	0.21293074	0.140418843	0.002211039	0.233218497	0.309994401	1.57E-05	0.139591174	0.025	0.001143273	0.128497944	0.062477743	0.009781526	0.071958079	0.162817186	0.793129322	0.271074741	0.266718705	0.002776262	0.114980382	0.041457354	0.563697276	0.250290856	0.256139881	0.208367945	0.07744211	0
PDDC1	-	Alu	no-conserve	0.00076963	0.56883768	0.295004932	0.000281445	0.613365764	0.550931899	0.253327513	0.504450184	0.68167789	0.099660967	0.590951413	0.620263535	2.09E-05	0.628932639	0.740727888	0.077428946	0.646199783	0.712931317	0.153910556	0.678387437	0.713196385	0.004649978	0.549824516	0.317503497	7.48E-07	0.385973519	0.108039949	0.000147262	0.168120046	0.48533265	0.999520398	0.740662119	0.725997733	0.003605896	0.397973294	0.193350549	5.24E-06	0.724072523	0.647535954	0.262580787	0.166231482	0.115889417
PDDC1	-	Alu	no-conserve	0.000390695	0.225491877	0.095630297	5.16E-07	0.283295803	0.190363843	0.725701685	0.180132961	0.297391257	0.0541526	0.275565187	0.229058438	0.000208918	0.207488436	0.287346843	0.779001918	0.32597208	0.327780149	0.000348003	0.252228816	0.344503753	0.018470272	0.340287983	0.236353113	1.50E-05	0.1837457	0.066488684	8.38E-05	0.082079925	0.234922757	0.073252069	0.272667351	0.301162685	0.007118186	0.187154033	0.086233416	0.018055779	0.264376981	0.218270823	0.155756004	0.074456321	0.047344943
PDDC1	-	Alu	no-conserve	0.923893843	0.037663385	0.048008258	0.51252348	0.033580315	0.032439532	0.223588736	0.025108869	0.052460085	0.21310993	0.03149587	0.023973506	0.407607349	0.038121932	0.042761638	0.958638563	0.040706593	0.039926292	0.760184305	0.037539119	0.041720885	0.421212236	0.038281776	0.039056377	0.003919417	0.031742928	0.017889852	0.059972588	0.023059314	0.032066107	0.958351908	0.038431888	0.03975596	0.37625032	0.013295378	0.011479456	0.420948947	0.034501439	0.040543144	0.170325613	0.020138463	0.007178715
PDDC1	-	Alu	no-conserve	0.000484143	0.063221759	0.027547744	2.87E-06	0.068677808	0.048415468	0.315698256	0.055239921	0.029518449	0.344822438	0.050978609	0.04449813	0.218156617	0.049497803	0.066620286	0.001229953	0.078097065	0.056353519	0.224290375	0.057878379	0.048232762	0.046814271	0.082865026	0.068544879	0.000196573	0.070497129	0.040988472	0.996897283	0.057390378	0.048582758	0.153067935	0.060344939	0.070350724	0.043606088	0.03239208	0.01838657	0.004767055	0.063140817	0.047540352	0.982612386	0.073358463	0.087752525
PDDC1	-	Non-Alu-repetitive	no-conserve	0.000269432	0.086010706	0.041191188	1.32E-23	0.12246237	0.051466816	0.182275069	0.074754514	0.034088762	1.33E-06	0.083650233	0.038772163	0.000138994	0.058001437	0.084798291	0.165636514	0.113305762	0.099942507	0.003709267	0.080073169	0.104697519	0.628929417	0.154533283	0.145509393	5.60E-05	0.122176306	0.08001847	0.012737298	0.082744023	0.115549709	0.043431362	0.079678908	0.08980948	0.000256029	0.0778209	0.033553767	2.47E-07	0.091010282	0.059545481	0.708176145	0.06597501	0.068849206
PDDC1	-	Alu	no-conserve	0.535993625	0.029710369	0.022597021	1.08E-12	0.044978502	0.01773775	0.098293166	0.030747037	0.003875969	0.002885581	0.036369398	0.015678908	1.03E-06	0.014542657	0.037713664	0.00065235	0.053470062	0.0346741	2.96E-05	0.028401481	0.048558012	0.247382664	0.077177435	0.103478992	0.019152945	0.037793704	0.025355735	0.00446916	0.030157633	0.052777972	0.463677853	0.025298653	0.028912362	0.007240149	0.050322992	0.022805096	0.006191618	0.028032903	0.019560934	0.574017554	0.040434162	0.041305917
PDDC1	-	Alu	no-conserve	0.039965634	0.039297887	0.020946844	1.26E-16	0.061771374	0.021427941	0.244868877	0.035547504	0.008972074	3.13E-06	0.049184723	0.014775256	6.37E-08	0.012813367	0.045835477	0.029550094	0.077609737	0.062574059	8.93E-06	0.033282464	0.06779376	0.004727984	0.120228798	0.166854571	0.00977792	0.051294315	0.031686801	0.209205513	0.050637914	0.050940267	0.584240412	0.03058773	0.032125219	0.374424221	0.074591561	0.059814727	0.395305358	0.032246327	0.027818786	0.53858085	0.04844404	0.053054326
PDDC1	-	Alu	no-conserve	0.776531698	0.084006204	0.079081246	8.76E-06	0.091217328	0.067563206	0.030613122	0.077863807	0.153724054	0.038464592	0.076276855	0.058305987	0.157440285	0.072110959	0.082125047	0.893207575	0.086266333	0.08310531	0.65378912	0.084705189	0.086012197	0.223056613	0.107094298	0.088917769	0.100240829	0.102452041	0.093215665	0.785860975	0.076527394	0.07319131	0.338931144	0.087369983	0.092636389	0.87045679	0.102921823	0.10162344	0.062050936	0.093697728	0.082318207	0.675242069	0.099423405	0.100766908
PDDC1	-	Alu	no-conserve	0.01277706	0.03535791	0.121226098	0.025969316	0.037522747	0.04361098	0.011300828	0.028980227	0.139510489	0.152890771	0.032615987	0.019635844	0.002055199	0.021753676	0.041515057	0.026516595	0.053555368	0.039107341	0.00556837	0.035101345	0.052032301	5.10E-05	0.062367789	0.035213592	0.335221727	0.045863288	0.060798202	0.013776228	0.02782451	0.056125627	0.234978825	0.041078297	0.037304077	0.593009868	0.036288095	0.037961345	0.00397902	0.035952511	0.022529481	0.005045796	0.033231522	0.084228248
PDDC1	-	Alu	no-conserve	7.36E-05	0.116697619	0.045649591	6.09E-12	0.126936686	0.076051349	0.265712379	0.106557451	0.159188034	0.001397601	0.111473885	0.065889838	0.504837466	0.102857305	0.108657843	0.765978176	0.131875688	0.13480045	0.302663839	0.119405949	0.12995951	0.211336747	0.168663126	0.14189222	1.43E-06	0.10513851	0.048462768	0.102776869	0.084050244	0.119143961	0.02718126	0.119529076	0.1019128	4.74E-05	0.123934801	0.051480699	0.07835457	0.119882833	0.102159385	0.541817608	0.126021554	0.144204157
PDDC1	-	Alu	no-conserve	0.006423406	0.261193806	0.166540528	1.32E-09	0.291156998	0.222862403	0.42143835	0.226916787	0.276455026	0.145501185	0.212149278	0.171985917	0.000306219	0.258315992	0.333407521	0.013322165	0.278165857	0.3239629	0.924271854	0.297002285	0.300040611	0.001698951	0.249705394	0.155376003	0.000617377	0.222227396	0.144937602	0.345467278	0.172315244	0.208648776	0.94536946	0.308098063	0.309319763	0.0027999	0.230062848	0.119260356	0.067427634	0.308094366	0.285273897	0.889438709	0.244774807	0.222619048
PDDC1	-	Alu	no-conserve	0.062493427	0.132006631	0.096506031	6.64E-06	0.154721755	0.116176176	0.218167007	0.102879477	0.04740958	0.245253621	0.103306391	0.084508015	0.032474669	0.114197425	0.136057306	0.558115155	0.142646232	0.142437772	0.454978495	0.138727196	0.149864561	4.69E-05	0.141224702	0.065658984	0.000565113	0.10719053	0.065907992	0.036879773	0.087795297	0.12051119	0.142155159	0.160798259	0.14429625	0.006534576	0.099171284	0.050979285	1.66E-05	0.146560569	0.102677011	0.23352731	0.091800255	0.14280303
PDDC1	-	Alu	no-conserve	0.002501107	0.192104472	0.117364371	0.029622331	0.223074526	0.204557298	0.413017635	0.168260026	0.216435185	0.430784734	0.157274884	0.170252274	0.005842761	0.165347977	0.203159779	0.099989266	0.188450212	0.209434868	0.021501335	0.205063114	0.241273063	2.22E-05	0.18412745	0.092995459	0.000381432	0.169819004	0.112056647	0.117889159	0.133359006	0.177519765	0.202354529	0.216198755	0.203746076	0.002388031	0.143932706	0.06640616	0.433971565	0.220855667	0.209546779	0.019157997	0.164303561	0.024193549
PDDC1	-	Alu	no-conserve	0.016377228	0.242051438	0.158854081	0.015044905	0.275642847	0.246862773	0.056087122	0.226909117	0.319358483	0.575082964	0.193847875	0.204023986	0.111457695	0.260488094	0.291816341	0.00639248	0.235850143	0.271084863	0.660215986	0.272696788	0.285981064	2.97E-07	0.194241612	0.063503413	0.002078955	0.198625813	0.13834672	0.469183305	0.161971136	0.187178924	0.146090695	0.29321301	0.276685462	0.006893165	0.149111507	0.058720121	0.862113087	0.289674547	0.28433459	0.731009156	0.214786558	0.237012987
PDDC1	-	Alu	no-conserve	0.475532395	0.214535304	0.226227045	0.17167829	0.232234843	0.22138138	0.006464642	0.170904605	0.420512821	0.138508684	0.14419503	0.112813066	0.000175319	0.189753796	0.242531976	0.570419854	0.240953729	0.232483076	0.23829447	0.217162435	0.234024693	9.05E-06	0.187498514	0.086313888	0.048229415	0.174741962	0.140357944	0.006847122	0.131999575	0.208183734	0.778480586	0.246461758	0.246892622	0.068266282	0.162903588	0.118105617	0.032683917	0.220337064	0.192715468	0.964786395	0.185593744	0.177718833
PDDC1	-	Alu	no-conserve	0.301598286	0.036215772	0.02655926	0.040403314	0.039005367	0.029947309	0.762784328	0.032158599	0.031411678	0.559921818	0.026606942	0.025245937	0.507561709	0.031486337	0.037631546	0.917534914	0.040109307	0.037883102	0.385482469	0.032911017	0.027656476	7.59E-06	0.044010466	0.013936649	0.000308236	0.032999314	0.017723814	0.146867613	0.023982777	0.032556683	0.516852931	0.034979203	0.03293938	0.291158381	0.022619149	0.01884678	0.985939891	0.037710029	0.034536742	0.679352414	0.029026061	0.020833333
PDDC1	-	Alu	no-conserve	0.072219017	0.156853229	0.110121684	3.11E-08	0.188848328	0.132451545	0.127100718	0.130885295	0.058635394	0.256648781	0.116704505	0.096692016	8.23E-06	0.118415872	0.181948359	0.304011901	0.188465533	0.172418542	0.073756253	0.150701278	0.165875457	0.0014441	0.187999665	0.12268783	0.02135722	0.140017957	0.108828611	0.001678217	0.09105937	0.157505317	0.944892247	0.166790018	0.160394121	0.004088136	0.153917861	0.079838722	0.000249198	0.173424373	0.139812097	0.665056953	0.173579759	0.146153846
PDDC1	-	Alu	no-conserve	0.337964806	0.035425243	0.035231289	0.525182032	0.033826001	0.028619692	0.346093062	0.02623693	0.00952381	0.449670598	0.027742616	0.032944507	0.478997477	0.027579412	0.032878737	0.242710395	0.035287825	0.029323278	0.19598252	0.032186166	0.042215784	1.90E-05	0.03680216	0.008653307	0.285090163	0.023850535	0.023400633	0.203058136	0.025521021	0.030859566	0.36581988	0.031850466	0.02789385	0.034705777	0.040539583	0.021708031	0.052204531	0.03346408	0.022900944	0.47222164	0.061573528	0.034090909
PDDC1	-	Alu	no-conserve	0.917323587	0.030391546	0.031246667	0.15669431	0.037070663	0.030543565	0.827931543	0.035194384	0.025388292	0.456656516	0.024193268	0.024415204	0.715316884	0.03810029	0.039528992	0.034425889	0.036392118	0.044916757	0.152593509	0.033752657	0.04467111	0.00061611	0.037718168	0.016691769	0.014368727	0.032190806	0.019994452	0.530298621	0.02241135	0.030688957	0.591829196	0.034609487	0.031639782	0.054521355	0.033150442	0.015886134	0.782277214	0.042008826	0.042941889	0.159163291	0.053110976	0.011363636
PDDC1	-	Alu	no-conserve	0.722906652	0.065910784	0.078253012	0.305411686	0.08217907	0.08662464	0.400586996	0.06089848	0.083650794	0.95846356	0.068491694	0.065975533	0.129491285	0.059254944	0.069150209	0.715724314	0.089872945	0.093068847	0.165825328	0.068471996	0.080222133	0.004110846	0.070929749	0.050989205	0.286625999	0.069392337	0.067082015	0.008666794	0.058774687	0.093666071	0.443456177	0.083439966	0.095600225	0.980988894	0.072974918	0.089185213	0.012601327	0.080413504	0.065816476	0.141410314	0.084015615	0.16710655
PDDC1	-	Alu	no-conserve	0.784650802	0.277926865	0.269078454	0.005363586	0.283754591	0.254216878	0.065189049	0.225524334	0.355655931	0.274678711	0.213843159	0.18996047	0.000271581	0.256555661	0.317017735	0.636054535	0.280244224	0.292447467	0.354816453	0.302058295	0.325846992	6.57E-05	0.259257594	0.138692499	0.161043135	0.226045112	0.193332228	0.303441625	0.209556686	0.246621339	0.441659888	0.328568194	0.333536949	0.086072881	0.230714754	0.172398572	2.69E-10	0.33024009	0.253717211	0.95869123	0.322743761	0.325543478
PDDC1	-	Alu	no-conserve	0.246764484	0.281918565	0.239275355	6.60E-06	0.318161775	0.267208462	0.773395974	0.249594287	0.355787691	0.663070987	0.25363115	0.276465743	4.52E-07	0.283319383	0.380930395	8.83E-05	0.302917723	0.358936745	0.008384903	0.346808995	0.393289297	0.056334934	0.289675198	0.230146718	0.374231032	0.24154265	0.22379495	0.04352234	0.204655927	0.265216996	0.509661216	0.345215779	0.360804135	0.196330102	0.218925918	0.174299467	0.429717378	0.348365302	0.355559014	0.064141864	0.315023867	0.138235294
PDDC1	-	Alu	no-conserve	0.034617287	0.146593717	0.103396933	8.70E-06	0.179470572	0.137121794	0.182279566	0.132022806	0.082722833	0.245180426	0.150827648	0.128587725	2.05E-06	0.14454123	0.231595633	0.000340672	0.177186894	0.223755644	0.000266319	0.188300577	0.248542617	0.193399219	0.178913898	0.155321822	0.565487819	0.128349265	0.149103476	0.018629264	0.09919594	0.140551531	0.121971139	0.184415187	0.200425372	0.122574592	0.120942672	0.091775829	0.019982238	0.199776286	0.221332523	0.324709767	0.169737714	0.109768908
PDDC1	-	Alu	no-conserve	0.679666929	0.187316806	0.206474775	0.004194573	0.207325082	0.174983533	0.033776539	0.141937447	0.411663216	0.334628102	0.15694497	0.137696586	4.48E-06	0.194926428	0.2697938	0.003092723	0.20759736	0.241838477	0.078413863	0.230331186	0.259957306	0.001643398	0.205234831	0.141531674	0.001023539	0.166991494	0.120096208	0.311463214	0.142700404	0.155294018	0.019314363	0.269966317	0.298995123	0.319189026	0.162982447	0.133403347	0.001248322	0.227996848	0.193838602	0.44085594	0.232580609	0.278451179
PDDC1	-	Alu	no-conserve	0.792748767	0.097271284	0.097434622	0.055977882	0.122916549	0.111314818	0.367986597	0.08978355	0.055649878	0.116848287	0.106778753	0.082739864	0.139949585	0.104778929	0.115481866	0.000324037	0.115849961	0.153177006	0.004432773	0.108109663	0.140470646	0.008673583	0.133703955	0.099088205	0.52519355	0.097300033	0.106183647	0.140288726	0.083758449	0.106267882	0.207724458	0.106204261	0.112952522	0.960126349	0.112517872	0.112764403	0.3637857	0.116922628	0.106156541	0.075350714	0.140585363	0.044444445
PDDC1	-	Alu	no-conserve	0.419082436	0.060983117	0.073506088	0.000199797	0.086426179	0.065444079	0.291158416	0.059852	0.024242424	0.06418163	0.075876163	0.053295933	0.000751345	0.057926583	0.092134782	0.009989633	0.098979932	0.121639049	0.000100626	0.08485698	0.136827349	0.095635976	0.10944974	0.089099074	0.577292467	0.066532821	0.073056648	0.016858863	0.042248665	0.083621996	0.637453658	0.073557405	0.070510094	0.063046386	0.056839356	0.031851336	0.325973721	0.081901895	0.086852251	0.457241929	0.050947516	0.022509579
PDDC1	-	Alu	no-conserve	0.475493453	0.129557297	0.110443243	0.000733292	0.131723027	0.107845598	0.011337874	0.101889948	0.204616831	0.008228191	0.1295733	0.086717025	2.18E-10	0.099118449	0.186164043	0.000134844	0.156924348	0.19786166	0.000456651	0.143117286	0.194807588	0.651437209	0.190385699	0.198657466	0.975732343	0.118306664	0.118453998	0.067084884	0.096058841	0.125232177	0.525996681	0.147090761	0.152817585	0.226207144	0.085818474	0.071034103	0.95360741	0.153359534	0.149602279	0.581688702	0.081968001	0.127011494
PDDC1	-	Alu	both	0.02977661	0.047882525	0.023768337	0.475934557	0.055387545	0.054262445	0.591025214	0.045110937	0.025925926	0.998320095	0.034911663	0.029999913	0.180444165	0.049054649	0.065496809	0.251562932	0.067090423	0.058327846	0.186144452	0.059558442	0.06948147	0.402684564	0.048627102	0.045202175	0.287617755	0.041820279	0.033227935	0.006731944	0.032939218	0.074924494	0.387524682	0.06545731	0.072577404	0.005478073	0.03147006	0.004740684	0.121891168	0.068711798	0.059491318	0.357945605	0.040268621	0.050933668
PDDC1	-	Alu	no-conserve	0.870396111	0.024452434	0.03521683	0.329315914	0.033988174	0.029243962	0.764213671	0.018517202	0.029411765	0.535535021	0.018710922	0.021252289	0.877874159	0.02733031	0.029008818	0.31628954	0.042298417	0.049419298	0.009742304	0.02783873	0.05552966	0.316881284	0.03640152	0.025695951	0.144898309	0.022857577	0.01539799	2.63E-06	0.016330885	0.063405287	0.698252777	0.036108263	0.040589132	0.043396881	0.013990485	0.003030303	0.128120661	0.0413718	0.029730305	0.458949019	0.031955694	0.044230769
PDDC1	-	Alu	chimp	0.518806591	0.028206081	0.036167625	0.140294135	0.029907612	0.039504278	0.629890187	0.025882966	0.00952381	0.526064576	0.019232011	0.023531446	0.299373446	0.02557423	0.049181625	0.008264249	0.042643803	0.025583162	0.004872084	0.029122718	0.046390844	0.114638949	0.02724145	0.021582137	0.07794043	0.025266056	0.018358985	0.006423263	0.01659118	0.056517922	0.289877396	0.045607672	0.056499076	0.309288177	0.013888643	0.015289256	0.228502759	0.040833178	0.035882426	0.269460436	0.02122834	0
PDDC1	-	Alu	no-conserve	0.11950771	0.02585925	0.010986325	0.46901977	0.028696003	0.024461712	0.125278238	0.023380171	0.058080808	0.279988834	0.01989105	0.024576833	0.155228802	0.037820375	0.055962208	0.919544272	0.035689334	0.036548042	0.034481525	0.031062022	0.053183026	0.03523885	0.019452126	0.005605042	0.070856749	0.017535171	0.006409872	0.00538266	0.014780083	0.052998028	0.903621391	0.042654985	0.044136697	0.026542938	0.021584574	0.007621067	0.785037716	0.044606671	0.04740517	0.368752734	0.01980666	0.026610644
PDDC1	-	Alu	chimp	0.003391769	0.046577035	0.012145749	0.757177202	0.04964506	0.043216015	0.527956274	0.042930746	0.084064328	0.103508947	0.034537206	0.046054353	0.326406582	0.066099889	0.083707669	0.02269609	0.062908761	0.082748881	0.33263099	0.063167021	0.076874099	0.070382937	0.026087723	0.013454545	0.017928909	0.024412025	0.008552271	0.325513429	0.023670111	0.035552323	0.130841758	0.080238843	0.070214109	0.003333548	0.063939165	0.030452329	0.565276058	0.084062534	0.07265517	0.986172501	0.061661159	0.070707071
PDDC1	-	Alu	chimp	0.01330138	0.199653693	0.09627193	0.751185753	0.219218001	0.220194576	0.4498931	0.205716969	0.321746881	0.134042569	0.115440521	0.1373677	0.769199501	0.319869782	0.313240707	0.168344308	0.222008855	0.258385596	0.09597173	0.275776643	0.34072	0.000688052	0.097861864	0.011272727	0.008430413	0.098894443	0.042720641	0.857083921	0.051407189	0.062745098	0.001314447	0.309978719	0.204574715	0.167459072	0.235008867	0.189569772	0.0550326	0.313674347	0.283764951	0.444013213	0.435415492	0.500035014
PDDC1	-	Alu	chimp	0.038092157	0.095536086	0.042746289	0.700359883	0.09133743	0.081447822	0.834972959	0.081598897	0.036155203	0.565914213	0.05827235	0.062164819	0.755592724	0.154266997	0.160834625	0.139503944	0.107961934	0.091157933	0.012387858	0.121047424	0.175526401	0.004679818	0.038154491	0.007272727	0.011068454	0.04520129	0.008504642	0.059209743	0.016880681	0.043974408	0.069949515	0.151583675	0.122905504	0.124423768	0.196865534	0.167403634	0.489529733	0.15263546	0.164703569	0.154210781	0.159498438	0.06979405
PDDC1	-	Alu	chimp	0.122497808	0.046533078	0.020236781	0.199281886	0.048388288	0.036246767	0.149219641	0.039777306	0.083333333	0.987844655	0.032442836	0.031882701	0.149044966	0.071838452	0.09300776	0.773886223	0.054161442	0.055750499	0.086861906	0.066436237	0.088126332	0.001824603	0.021401382	0	0.026719345	0.024515325	0.005805638	0.008121433	0.008061856	0.026706137	0.554694754	0.077899232	0.087030712	0.852443509	0.11019356	0.113126605	0.376820416	0.077523226	0.081818368	0.371580934	0.093331952	0.052380953
PDDC1	-	Alu	chimp	0.441184914	0.058632899	0.04787942	0.180756049	0.069165518	0.056781435	0.825688051	0.045714422	0.046840959	0.03207154	0.051390657	0.029994711	0.715345096	0.072008963	0.072652541	0.365361222	0.070268966	0.062408104	0.055048343	0.071276577	0.087499939	0.000752283	0.059551257	0.026670281	0.003450501	0.055923032	0.026396415	0.043107946	0.037085005	0.061609234	0.629486726	0.07468384	0.079843046	0.739828222	0.081908253	0.086653447	0.078010653	0.081164784	0.063982994	0.516910083	0.071482687	0.04256966
PDDC1	-	Alu	rhesus	0.161946704	0.041723474	0.031065859	0.318403411	0.047018348	0.046920504	0.407982421	0.040366233	0.017011197	0.366271587	0.0369602	0.026628201	0.312717599	0.061187646	0.055976387	0.014522763	0.048444201	0.063155926	0.016589739	0.050381763	0.07081862	0.010115954	0.060490675	0.037934006	0.007711404	0.04479231	0.030091929	0.052700247	0.026373669	0.047423292	0.79481702	0.04951252	0.049642446	0.002433868	0.042204091	0.018434822	0.933644778	0.049489623	0.046734096	0.459333675	0.031599589	0.047008547
PDDC1	-	Alu	both	0.504089793	0.245191352	0.260504977	0.027975845	0.257206435	0.235760035	0.035539165	0.219599095	0.438888889	0.40624735	0.190224031	0.167828557	0.091119568	0.265847987	0.292658476	0.379315543	0.254203737	0.263286619	0.28558944	0.282065893	0.302180354	7.43E-05	0.258705817	0.140064536	0.073823271	0.2120438	0.173591525	0.002440995	0.149942144	0.263307912	0.452083642	0.277196487	0.286283454	0.02923139	0.214551338	0.263039842	0.599656601	0.280474015	0.278429981	0.693475503	0.178377213	0.216666667
PDDC1	-	Alu	chimp	0.038471367	0.048992235	0.026272144	8.03E-05	0.053397931	0.031316276	0.026961602	0.039577332	0.120418972	0.026914591	0.036333074	0.016766725	0.001873006	0.029490825	0.055560148	0.860347143	0.053379776	0.054630739	0.992872418	0.05188908	0.048136124	7.51E-07	0.062926056	0.020497695	0.0024716	0.04799671	0.031140099	0.205170526	0.043239046	0.058200133	0.653694691	0.051111376	0.057826142	0.069742285	0.062748952	0.04451	9.65E-08	0.051803539	0.026015596	0.621674874	0.061474715	0.0875
PDDC1	-	Alu	chimp	0.124768303	0.069075148	0.047597576	1.59E-15	0.083232699	0.036081528	0.176564045	0.051757588	0.019063181	0.000733154	0.064150824	0.028936273	0.021792582	0.058201505	0.077997478	0.709593843	0.091764438	0.099782849	0.000910756	0.06359715	0.092035978	0.328448256	0.123220517	0.105603292	0.046213838	0.073518135	0.056285846	0.024667931	0.054856939	0.085475979	0.639981887	0.063426093	0.065587808	0.026799538	0.052231628	0.030082618	0.001156122	0.06881546	0.05179165	0.372365366	0.05316444	0.109416446
PDDC1	-	Alu	chimp	0.020528234	0.019620094	0.00691855	3.68E-08	0.035053649	0.016137761	0.596579787	0.017977761	0.020658263	0.023267693	0.02559372	0.010189603	0.006252137	0.010110339	0.023865764	0.784698187	0.038947388	0.037973838	2.62E-06	0.018937872	0.04185698	0.935360893	0.064236489	0.066514973	0.11080597	0.028406525	0.020921399	0.738372236	0.021080789	0.016761641	0.528422404	0.017189238	0.018788276	0.358141219	0.016842711	0.011577439	0.601416642	0.021106298	0.018511993	0.335018641	0.014341308	0
PDDC1	-	Alu	chimp	0.565239288	0.056859287	0.046536015	0.029591034	0.068099892	0.056860285	0.24218176	0.051284427	0.015151515	0.161124692	0.041174457	0.028136232	0.00074853	0.028825182	0.04973359	0.032816891	0.071290658	0.054480704	0.019497205	0.048051781	0.061185579	0.282813717	0.081001616	0.102871914	0.014255677	0.053994171	0.034992008	0.142804897	0.036036084	0.044344996	0.086611535	0.048784629	0.040041617	0.135099279	0.042637951	0.028131343	0.00119735	0.056741489	0.036696684	0.450865185	0.029646945	0.03219697
PDDC1	-	Alu	chimp	0.445409288	0.03670216	0.024312403	1.43E-07	0.061405582	0.026208226	0.202414958	0.027275887	0	0.01447718	0.03294725	0.016597121	0.882527667	0.037281115	0.040340013	0.763245994	0.063433795	0.066325451	0.002944728	0.043246295	0.070169087	0.001158644	0.078281369	0.038842485	0.000212369	0.047148636	0.016111537	0.005377881	0.022662391	0.054426507	0.004268822	0.036716943	0.049887099	0.075752488	0.02540984	0.015722317	2.17E-05	0.046729658	0.020917366	0.961637276	0.02299504	0.013888889
PDDC1	-	Alu	both	0.016031623	0.106969409	0.055188551	0.005064975	0.130371108	0.094332989	0.85640184	0.08603473	0.113425926	0.918095697	0.09161629	0.07316207	0.485144065	0.136361158	0.144568522	0.039698333	0.133258387	0.159787975	0.005985459	0.134722545	0.179181765	3.24E-07	0.129134357	0.040151001	0.002216432	0.078851053	0.038218391	0.001438921	0.018209601	0.073713655	0.5282491	0.146034812	0.150423367	0.148594461	0.086059834	0.068374018	0.454665716	0.130270654	0.12255094	0.586968685	0.059418513	0.07771261
PDDC1	-	Alu	chimp	0.085107442	0.155833963	0.110268356	0.072982661	0.166949841	0.143518332	0.94279136	0.122988973	0.112698413	0.356626972	0.124279556	0.134813159	0.051479888	0.242401397	0.197351936	0.245222226	0.174501498	0.19842308	0.74606884	0.226177587	0.234148236	3.57E-05	0.154285384	0.079008741	7.33E-05	0.118281899	0.039146097	0.102303302	0.044193737	0.07363524	0.646919053	0.226970615	0.237355239	0.841651207	0.12948804	0.12560256	0.035906104	0.190380872	0.163158568	0.364381088	0.122359531	0.064285714
PDDC1	-	Alu	no-conserve	0.159076894	0.094850392	0.077686125	0.170610467	0.104484824	0.093006557	0.840360516	0.082234789	0.080952381	0.814143353	0.084953471	0.080265032	0.487939239	0.144080721	0.130310882	0.021307507	0.109083278	0.138023456	0.691626135	0.148265647	0.147183768	2.63E-05	0.109979649	0.05633658	0.00025705	0.073768432	0.022759982	0.237780583	0.028987667	0.044259188	0.064081231	0.14500312	0.122062654	0.452364842	0.076150183	0.094720587	0.052447743	0.120406236	0.100970136	0.289081335	0.072998402	0.020833333
PDDC1	-	Alu	chimp	0.053256559	0.127590865	0.085540342	0.003828647	0.146004846	0.11156737	0.501931289	0.099988472	0.154285714	0.79506743	0.108550809	0.107155471	0.24229645	0.184299343	0.160021293	0.067703682	0.137251307	0.159134868	0.664456341	0.175831476	0.183429792	1.16E-05	0.138823499	0.066017145	0.007127132	0.098206837	0.067806307	0.014207247	0.034759255	0.077037978	0.660362524	0.184494923	0.188008921	0.795056466	0.128593961	0.131947462	0.051184468	0.162294985	0.135568565	0.893982382	0.14188401	0.125
PDDC1	-	Alu	both	0.011182386	0.055482268	0.034506721	0.00390502	0.068084133	0.045585547	0.649774372	0.040313213	0.047816092	0.800898412	0.044822162	0.042084409	0.711933248	0.083213247	0.077130101	0.00193374	0.070716054	0.095283889	0.009580176	0.07411378	0.102370598	0.000432086	0.079333968	0.040109498	0.019886417	0.048398483	0.034895787	0.000993909	0.018998826	0.06333845	0.160959856	0.070053359	0.081928391	0.478106233	0.04436168	0.050439667	0.107845153	0.066297594	0.052173318	0.949072683	0.045352684	0.046491228
PDDC1	-	Alu	chimp	0.346834461	0.052392545	0.037688018	0.010745849	0.063911236	0.046624643	0.47915756	0.040393225	0.107350427	0.01300711	0.047703508	0.021145701	0.40299654	0.066196924	0.078714815	0.037880803	0.080223362	0.097508805	0.046591979	0.067693738	0.092475813	4.61E-05	0.072043258	0.032323676	0.004921141	0.049465296	0.027928358	0.383056055	0.02136313	0.027807487	0.26483423	0.075422387	0.087137283	0.680554465	0.050277122	0.046174216	0.119778734	0.069995008	0.056683953	0.66201667	0.043782501	0.062695925
PDDC1	-	Alu	both	0.127721695	0.086304913	0.063906441	5.24E-13	0.10802329	0.061777981	0.971723337	0.074909676	0.075281803	0.000144271	0.08278271	0.039401326	0.256926496	0.102236519	0.096148171	0.065965456	0.121543511	0.136629402	0.006931867	0.098207485	0.122897367	0.424872274	0.126039968	0.122504237	0.551663763	0.100478856	0.088696866	0.030185219	0.071118859	0.104822675	0.441315972	0.094085018	0.098883411	0.018187488	0.062651403	0.032131263	0.108475702	0.087803677	0.07269999	0.561362502	0.049459234	0.068452381
PDDC1	-	Alu	chimp	0.081476435	0.073923895	0.050353253	4.03E-12	0.098715899	0.057093285	0.356258931	0.067041742	0.035788228	0.027663095	0.08863153	0.05939768	0.366795681	0.069624413	0.078863528	0.273621249	0.104155479	0.113235947	0.000205925	0.073334594	0.111896027	0.205037967	0.133935436	0.152902308	0.000748514	0.091524847	0.056339532	0.286470396	0.073176236	0.0778196	0.184243614	0.077853241	0.086622301	0.140807663	0.048435337	0.034922874	0.000620348	0.075585143	0.054291893	0.879594365	0.041431488	0.022509579
PDDC1	-	Alu	chimp	0.217419212	0.031911806	0.01712415	0.00918776	0.062394471	0.04561368	0.304919043	0.025235214	0	0.136949806	0.02274289	0.027605126	0.232603217	0.0520678	0.0674059	0.729238943	0.063837764	0.061151427	0.004094298	0.040972553	0.067539646	0.00665232	0.028178885	0.007121212	0.004134891	0.021279778	0.005513452	0.076106223	0.036021127	0.056935094	0.819403584	0.042709056	0.044023393	0.021574397	0.015660841	0.003920322	0.938797076	0.049150878	0.047193706	0.746551009	0.022242757	0.011363636
PDDC1	-	Alu	both	0.027653753	0.142143002	0.057070307	0.622346605	0.220711524	0.205498733	0.591696021	0.130175314	0.076923077	0.296524833	0.148037878	0.157151267	0.560063848	0.248872675	0.269157531	0.090412702	0.238904014	0.193353754	0.000107583	0.191307455	0.325031638	0.000145911	0.113545331	0.014666667	0.000267876	0.09085329	0.01661442	0.002671509	0.084262873	0.215025305	0.476698001	0.234047412	0.21765179	0.008299795	0.215453792	0.123184846	0.120349236	0.219641326	0.183748286	0.768242976	0.212775867	0.233201581
PDDC1	-	Alu	rhesus	0.016431908	0.192406553	0.061178587	0.241303706	0.200729896	0.155086617	0.193734531	0.161593987	0	0.000592227	0.164787848	0.28735171	0.624456611	0.458248378	0.430226846	0.163128103	0.22354202	0.178512664	0.005522542	0.282669511	0.437684307	0.004033433	0.088791018	0.01	0.005579338	0.079716029	0.011442006	0.00053384	0.081668091	0.266921221	0.403078138	0.376069895	0.392206489	0.045466186	0.371903126	0.24075285	0.103138423	0.335609217	0.300057503	0.858069957	0.383849843	0.43939394
PDDC1	-	Alu	rhesus	0.870632804	0.011609062	0.016393241	0.004113511	0.023055952	0.012125046	0.355492085	0.016410741	0	0.785544574	0.012640916	0.011637215	0.301296366	0.022572599	0.039653726	0.681628636	0.025655634	0.029434971	0.01816377	0.022396363	0.032418979	0.006320028	0.018926736	0.003636364	0.00923072	0.015656872	0.008068081	0.610472165	0.010447972	0.01661639	0.072170451	0.021154856	0.031752015	0.637227115	0.016708193	0.018628991	0.172028578	0.02214163	0.030556409	0.253942234	0.015795335	0
PDDC1	-	Alu	both	0.861627319	0.123197501	0.122302294	0.003200838	0.14554161	0.117229656	0.846159	0.108509767	0.092067776	0.912004202	0.110598059	0.098739655	0.088615916	0.151901065	0.190532949	0.085125234	0.143503253	0.169320402	0.094967332	0.165433201	0.195293434	3.01E-06	0.117060035	0.03038961	0.005953621	0.092544847	0.055930272	0.022493351	0.06152494	0.103231111	0.390345361	0.180832028	0.172677692	0.290779779	0.159598013	0.137575778	0.103191138	0.150577639	0.136557227	0.877936265	0.151447616	0.15467164
PDDC1	-	Alu	both	0.096414452	0.059716698	0.032844921	0.106184989	0.073375592	0.059554107	0.788171502	0.049912334	0.049382716	0.787235608	0.053266691	0.048552238	0.692299221	0.077367382	0.074957218	0.26441737	0.073025708	0.081778858	0.032678823	0.085070566	0.107991764	8.51E-06	0.071622399	0.024112554	0.017469634	0.056804618	0.034481889	0.118335353	0.042968689	0.066348242	0.610741848	0.090844757	0.091856672	0.363606965	0.06403807	0.052314077	0.917688001	0.075747706	0.074991801	0.896511823	0.061631033	0.057440925
PDDC1	-	Alu	chimp	0.021338564	0.028301156	0.007880664	0.000612787	0.033941778	0.022258519	0.874555573	0.024358218	0.015873016	0.565455318	0.027125047	0.021478756	0.777143868	0.037324488	0.038767865	0.16181367	0.038755273	0.049657192	0.486418014	0.035048026	0.035612634	0.00076761	0.028481659	0.008341991	0.000830224	0.025038952	0.009446537	0.095668235	0.020264209	0.03345706	0.170298355	0.038391202	0.043723693	1	0.044813863	0.046938939	0.793887444	0.03827312	0.035667387	0.940499545	0.088917705	0.074549485
PDDC1	-	Alu	both	0.265522149	0.018133255	0.016708438	0.034016077	0.022099361	0.014314183	0.640206607	0.012619097	0.019607843	0.582345088	0.017383261	0.014914278	0.444050395	0.02356098	0.023551002	0.018642634	0.026366717	0.016716486	0.566390773	0.018930231	0.014548786	0.029767104	0.022252451	0.01483779	0.599004885	0.016071634	0.018537601	0.136471049	0.015399493	0.019744412	0.323205942	0.01945502	0.02347596	0.363331573	0.020828864	0.016966535	0.60197563	0.023815168	0.018963863	0.161349138	0.021556634	0
PDDC1	-	Alu	both	0.348694771	0.040695549	0.084035647	0.007649681	0.048077968	0.035343181	0.738463686	0.041288572	0.038436547	0.120441975	0.036073642	0.025756523	0.059370056	0.044145012	0.054484187	0.607009441	0.058070976	0.060370424	0.118462243	0.044041459	0.052923153	0.003509295	0.052617085	0.038240459	0.440478852	0.043137417	0.058581609	0.005975669	0.036161255	0.062943542	0.738366854	0.051172367	0.0491653	0.301085985	0.030885495	0.028877303	0.030524543	0.045910272	0.034224657	0.785969504	0.043987345	0.053571429
PDDC1	-	Alu	both	0.229871792	0.047254529	0.078564699	0.103238446	0.052771152	0.059241133	0.100078999	0.045713498	0.115953453	0.458922669	0.052905477	0.042272388	0.000276091	0.069408479	0.044582159	0.610562417	0.066269459	0.063555978	0.529121103	0.054124727	0.055878204	0.029891502	0.055273417	0.043089494	0.08712149	0.045877998	0.03637564	0.1221958	0.049177791	0.065485947	0.755965567	0.076689678	0.076568137	0.900104193	0.056174803	0.055131278	0.415923174	0.053719868	0.049308518	0.489618664	0.06451578	0.042261905
PDDC1	-	Alu	both	0.848661932	0.035837263	0.035496684	0.11331974	0.03606533	0.029320991	0.041767149	0.0305376	0.064058957	0.007390619	0.035617	0.015904257	0.308859055	0.034542305	0.038364985	0.623423629	0.039340217	0.035439562	0.018030092	0.03756141	0.051238009	0.02463784	0.048993261	0.036801138	0.274078487	0.032647851	0.028078979	0.034648026	0.026053539	0.042074923	0.70944405	0.035233412	0.037143002	0.844055939	0.039647777	0.040641901	0.895271504	0.030688408	0.029735209	0.94924996	0.068003385	0.058690476
PDDC1	-	Alu	both	0.377743764	0.109382496	0.092674572	2.08E-13	0.138864219	0.088230547	0.090464134	0.108818966	0.175150416	0.018332238	0.114057539	0.082437741	0.10090604	0.096113957	0.107478474	0.025593354	0.124878796	0.112201385	0.621961055	0.100501119	0.102782813	0.202822881	0.158280587	0.139342699	0.000297924	0.126130457	0.087616122	0.603627102	0.110773417	0.120120147	0.918136806	0.117309141	0.11571527	0.189787199	0.126120662	0.106501924	0.211155362	0.13296144	0.124858586	0.433266206	0.120459892	0.082380953
PDDC1	-	Alu	chimp	0.20136873	0.021688388	0.016645507	0.035451016	0.026203779	0.021236739	0.331097636	0.018544532	0.004385965	0.479734487	0.022104124	0.015104639	0.066107717	0.02063741	0.028321208	0.030309317	0.029736405	0.036248556	0.183077725	0.026479899	0.030528791	0.753824392	0.029076895	0.036565063	0.098650166	0.023758383	0.01998611	0.054615931	0.01830278	0.027907461	0.901769734	0.029426152	0.030129191	0.385984028	0.026556258	0.033371794	0.760446623	0.02494866	0.021554621	0.908027718	0.03569618	0.033364662
[truncated: 106,278 more rows]
