# Supplementary material for: Genomic Positional Dissection of RNA Editomes in Tumor and Normal Samples
Source: Front Genet. 2019 Mar 20;10:211. doi: 10.3389/fgene.2019.00211 (PMC6435843; doi:10.3389/fgene.2019.00211)
Supplement: FIGURE S1 — Histogram of shared RNA editing sites across multiple cancers filtered by four different average RNA editing level: A > 0%, B > 10%, C > 25%, D > 50%. Majority of the RNA editing sites occurs only in 1 or 2 cancers. [file Data_Sheet_1.ZIP › SupplementaryTable2.xlsx]

## Sheet: Sheet1
Table S2. The number of RNA editing events detected in both GTEx and TCGA
					GTEx		TCGA
Chr	Length	Exome%	LincRNA	PCRNA	Number of Editing	per1000	Number of editing	per1000
1	248956422	0.0238368	576	2052	445159	1.7881	11906	0.0478236
2	242193529	0.0193847	577	1255	342666	1.41484	7300	0.0301412
3	198295559	0.0193074	353	1076	288232	1.45355	5402	0.0272422
4	190214555	0.0133394	405	751	195338	1.02694	3442	0.0180954
5	181538259	0.0157026	490	876	215283	1.18588	4542	0.0250195
6	170805979	0.0152743	360	1045	218060	1.27665	4704	0.02754
7	159345973	0.0189304	286	906	267888	1.68117	6207	0.038953
8	145138636	0.0153118	412	676	177305	1.22163	4262	0.029365
9	138394717	0.0157941	275	781	185146	1.33781	3193	0.0230717
10	133797422	0.0158348	280	732	225917	1.6885	3485	0.0260468
11	135086622	0.0280486	305	1276	207114	1.53319	4879	0.0361176
12	133275309	0.026625	438	1034	262597	1.97033	5600	0.0420183
13	114364328	0.00817923	241	327	93709	0.81939	1552	0.0135707
14	107043718	0.0205102	297	623	166356	1.55409	3561	0.0332668
15	101991189	0.0234744	300	597	170440	1.67112	3868	0.0379248
16	90338345	0.0346876	360	866	218133	2.41462	5459	0.0604284
17	83257441	0.0470218	338	1197	272363	3.27134	7599	0.0912711
18	80373285	0.0141934	246	270	77186	0.960344	1263	0.0157142
19	58617616	0.0677943	236	1470	278777	4.75586	13801	0.235441
20	64444167	0.0190026	214	544	115787	1.7967	2913	0.0452019
21	46709983	0.0144429	191	233	44414	0.950846	963	0.0206166
22	50818468	0.0261829	165	438	113295	2.22941	3359	0.066098
X	156040895	0.0106808	136	841	93511	0.599272	2982	0.0191104
Y	57227415	0.0018257	52	53	11870	0.207418	47	0.000821285
