# Supplementary material for: Genomic Positional Dissection of RNA Editomes in Tumor and Normal Samples
Source: Front Genet. 2019 Mar 20;10:211. doi: 10.3389/fgene.2019.00211 (PMC6435843; doi:10.3389/fgene.2019.00211)
Supplement: FIGURE S1 — Histogram of shared RNA editing sites across multiple cancers filtered by four different average RNA editing level: A > 0%, B > 10%, C > 25%, D > 50%. Majority of the RNA editing sites occurs only in 1 or 2 cancers. [file Data_Sheet_1.ZIP › SupplementaryTable3.xlsx]

## Sheet: Sheet1
Table S3 Differential RNA editing results
Cancer	chr	pos	gene	P	adj P
LIHC	chr1	10042892	NMNAT1	0.00924071	0.0272829
LIHC	chr1	10042937	NMNAT1	0.00519902	0.017892
LIHC	chr1	10042955	NMNAT1	0.000355625	0.00263501
LIHC	chr1	10042987	NMNAT1	0.00220913	0.00979344
LIHC	chr1	10042988	NMNAT1	0.00325224	0.0128798
LIHC	chr1	10043079	NMNAT1	0.0103284	0.029457
LIHC	chr1	10043250	NMNAT1	0.0037813	0.0142556
LIHC	chr1	10043451	NMNAT1	0.020375	0.0489765
LIHC	chr1	10043527	NMNAT1	0.0095935	0.0280361
LIHC	chr1	10043537	NMNAT1	0.019248	0.0472222
LIHC	chr1	10043567	NMNAT1	0.0169669	0.0429463
LIHC	chr1	10044223	NMNAT1	0.00576017	0.0193527
LIHC	chr1	10044235	NMNAT1	0.00238281	0.0104104
LIHC	chr1	10044245	NMNAT1	0.00060054	0.00387307
LIHC	chr1	10044271	NMNAT1	0.00983607	0.0285745
LIHC	chr1	10044272	NMNAT1	0.00684088	0.0219932
LIHC	chr1	10044310	NMNAT1	0.000150726	0.00141246
LIHC	chr1	100489992	SLC35A3	0.00082418	0.00485394
LIHC	chr1	100653166	DBT	0.0151002	0.0391818
LIHC	chr1	100653245	DBT	0.000174446	0.00157336
LIHC	chr1	100654634	DBT	0.000555776	0.00364733
LIHC	chr1	100654640	DBT	0.011015	0.0310628
LIHC	chr1	100654652	DBT	0.000744631	0.00449567
LIHC	chr1	100654679	DBT	0.00220542	0.00978617
LIHC	chr1	10440721	KIF1B	0.00471665	0.0167353
LIHC	chr1	10519864	DFFA	0.00350102	0.0136402
LIHC	chr1	10519887	DFFA	0.000534987	0.00354151
LIHC	chr1	10519888	DFFA	0.000122706	0.00122057
LIHC	chr1	10519900	DFFA	0.0126234	0.0343103
LIHC	chr1	10519932	DFFA	0.00126258	0.00661428
LIHC	chr1	10519936	DFFA	0.000775092	0.0046297
LIHC	chr1	10519946	DFFA	0.0168013	0.0426356
LIHC	chr1	10519947	DFFA	0.00566756	0.0190891
LIHC	chr1	10519973	DFFA	0.00216728	0.00969424
LIHC	chr1	10519975	DFFA	0.0087319	0.0260782
LIHC	chr1	10519982	DFFA	0.00201411	0.00923854
LIHC	chr1	10520045	DFFA	0.017128	0.0429599
LIHC	chr1	10520145	DFFA	0.0171278	0.0429599
LIHC	chr1	10520190	DFFA	0.0093709	0.0275721
LIHC	chr1	10520202	DFFA	0.00828805	0.0252819
LIHC	chr1	10520219	DFFA	3.05e-05	0.000443739
LIHC	chr1	10520226	DFFA	5.37e-05	0.000676712
LIHC	chr1	10520233	DFFA	0.00585651	0.0196133
LIHC	chr1	10520258	DFFA	0.000135868	0.00130653
LIHC	chr1	10520288	DFFA	0.00995671	0.0288291
LIHC	chr1	10520378	DFFA	0.00150824	0.00752464
LIHC	chr1	10520383	DFFA	0.000465874	0.00320945
LIHC	chr1	10520403	DFFA	0.00143441	0.00726617
LIHC	chr1	10520439	DFFA	0.000634657	0.00399888
LIHC	chr1	10520450	DFFA	0.0043148	0.0158106
LIHC	chr1	10520487	DFFA	0.000431971	0.00303051
LIHC	chr1	10520505	DFFA	0.000651465	0.00407967
LIHC	chr1	10520523	DFFA	0.0188402	0.0464006
LIHC	chr1	10520649	DFFA	0.015688	0.0403998
LIHC	chr1	10520672	DFFA	0.000111937	0.0011336
LIHC	chr1	10520692	DFFA	0.00367441	0.0139957
LIHC	chr1	10520715	DFFA	0.00552017	0.0186783
LIHC	chr1	10520751	DFFA	0.0019936	0.0091677
LIHC	chr1	10520767	DFFA	0.00145366	0.00734633
LIHC	chr1	10520814	DFFA	0.00516508	0.017892
LIHC	chr1	10520819	DFFA	0.000118994	0.00119146
LIHC	chr1	10520858	DFFA	0.00192158	0.00890959
LIHC	chr1	10520866	DFFA	0.000176445	0.00158834
LIHC	chr1	10521126	DFFA	0.00182475	0.00857612
LIHC	chr1	10521162	DFFA	0.000512085	0.00341664
LIHC	chr1	10521170	DFFA	7.55e-05	0.000852817
LIHC	chr1	10521237	DFFA	3.45e-05	0.000485143
LIHC	chr1	10521238	DFFA	1.67e-06	4.79998e-05
LIHC	chr1	10521260	DFFA	0.00131478	0.00676351
LIHC	chr1	109474772	CLCC1	0.00536169	0.0182734
LIHC	chr1	109475706	CLCC1	0.00734937	0.0229547
LIHC	chr1	109475746	CLCC1	0.00919993	0.0271809
LIHC	chr1	109606172	TAF13	0.0163269	0.041685
LIHC	chr1	109606243	TAF13	0.00104441	0.00581901
LIHC	chr1	109606523	TAF13	0.00321686	0.0127698
LIHC	chr1	109606612	TAF13	0.0119271	0.0331207
LIHC	chr1	109606614	TAF13	0.00546698	0.0185329
LIHC	chr1	109606657	TAF13	0.00402308	0.0149672
LIHC	chr1	11081282	TARDBP	0.0115883	0.0323861
LIHC	chr1	11081296	TARDBP	0.0019551	0.00903654
LIHC	chr1	11081313	TARDBP	0.0140867	0.0374648
LIHC	chr1	11081450	TARDBP	0.00224873	0.00992594
LIHC	chr1	11081888	TARDBP	0.0165463	0.0421217
LIHC	chr1	11081936	TARDBP	0.00754368	0.0234458
LIHC	chr1	113241738	MOV10	0.00897302	0.0266462
LIHC	chr1	115126266	DENND2C	0.00816029	0.0249796
LIHC	chr1	115127142	DENND2C	0.000512195	0.00341664
LIHC	chr1	115127147	DENND2C	0.000111815	0.00113356
LIHC	chr1	115127158	DENND2C	0.0158814	0.0408354
LIHC	chr1	115127169	DENND2C	0.00186499	0.00871677
LIHC	chr1	117631012	TTF2	0.00988433	0.0286831
LIHC	chr1	119693495	WARS2(dist=10200)andHAO2(dist=217907)	0.00765365	0.0237155
LIHC	chr1	119693512	WARS2(dist=10217)andHAO2(dist=217890)	0.0108849	0.030785
LIHC	chr1	12035739	PLOD1	0.00069317	0.00428274
LIHC	chr1	1251479	CPSF3L	0.0107751	0.0305488
LIHC	chr1	1251538	CPSF3L	1.92e-05	0.000310205
LIHC	chr1	1251540	CPSF3L	1.35e-06	4.06901e-05
LIHC	chr1	1251550	CPSF3L	0.000292079	0.00228816
LIHC	chr1	1251579	CPSF3L	0.00438622	0.0158106
LIHC	chr1	1251610	CPSF3L	1.5e-06	4.43036e-05
LIHC	chr1	1251631	CPSF3L	7.55e-05	0.000852817
LIHC	chr1	1251777	CPSF3L	0.00259895	0.0110011
LIHC	chr1	1251803	CPSF3L	0.00871557	0.0260498
LIHC	chr1	1251841	CPSF3L	0.00396818	0.0148248
LIHC	chr1	1251844	CPSF3L	0.0019998	0.00918902
LIHC	chr1	1251857	CPSF3L	0.0122324	0.0334325
LIHC	chr1	1251869	CPSF3L	0.00734893	0.0229547
LIHC	chr1	1251909	CPSF3L	0.0103274	0.029457
LIHC	chr1	1251914	CPSF3L	0.000199747	0.00173256
LIHC	chr1	1251927	CPSF3L	0.017128	0.0429599
LIHC	chr1	1252180	CPSF3L	0.00182475	0.00857612
LIHC	chr1	1252182	CPSF3L	0.00368769	0.0139957
LIHC	chr1	1252381	CPSF3L	0.00734852	0.0229547
LIHC	chr1	1252390	CPSF3L	0.00619274	0.0203054
LIHC	chr1	1252441	CPSF3L	0.00106547	0.00582801
LIHC	chr1	1252443	CPSF3L	0.00127607	0.00661428
LIHC	chr1	1252510	CPSF3L	0.0122323	0.0334325
LIHC	chr1	1252513	CPSF3L	0.020255	0.0487526
LIHC	chr1	1252650	CPSF3L	0.00734844	0.0229547
LIHC	chr1	1252687	CPSF3L	0.00864764	0.0260498
LIHC	chr1	1252691	CPSF3L	0.00127587	0.00661428
LIHC	chr1	1252723	CPSF3L	1.02e-07	5.33573e-06
LIHC	chr1	1252749	CPSF3L	4.14e-05	0.000554986
LIHC	chr1	1345051	MRPL20(dist=2358)andANKRD65(dist=8749)	0.00309666	0.0124087
LIHC	chr1	1364330	TMEM88B(dist=1163)andVWA1(dist=6573)	0.00309725	0.0124087
LIHC	chr1	1365438	TMEM88B(dist=2271)andVWA1(dist=5465)	0.00127615	0.00661428
LIHC	chr1	1404764	ATAD3C	2.15e-05	0.000338762
LIHC	chr1	1404991	ATAD3C	1.3e-05	0.000233425
LIHC	chr1	1405117	ATAD3C	1.15e-05	0.000214509
LIHC	chr1	144829576	NBPF9	0.00929731	0.0274087
LIHC	chr1	144829598	NBPF9	0.0201674	0.0487526
LIHC	chr1	144829863	NBPF9	0.00115702	0.0062114
LIHC	chr1	145509599	RBM8A	0.0112949	0.0317054
LIHC	chr1	145688973	LOC100288142andNBPF10	0.00226141	0.00997183
LIHC	chr1	145689042	LOC100288142andNBPF10	0.00916273	0.0271036
LIHC	chr1	145689050	LOC100288142andNBPF10	0.0012837	0.0066399
LIHC	chr1	145689359	LOC100288142andNBPF10	0.000783461	0.00466617
LIHC	chr1	145689360	LOC100288142andNBPF10	0.00165618	0.00802357
LIHC	chr1	145689491	LOC100288142andNBPF10	0.00021733	0.0018536
LIHC	chr1	145689492	LOC100288142andNBPF10	0.00481584	0.0170192
LIHC	chr1	145689566	LOC100288142andNBPF10	0.00182699	0.00858259
LIHC	chr1	145689568	LOC100288142andNBPF10	0.00368558	0.0139957
LIHC	chr1	145689590	LOC100288142andNBPF10	0.0140736	0.0374385
LIHC	chr1	145689601	LOC100288142andNBPF10	0.00104672	0.00582795
LIHC	chr1	145689693	LOC100288142andNBPF10	0.00142486	0.00723025
LIHC	chr1	145689857	LOC100288142andNBPF10	0.00675241	0.02177
LIHC	chr1	146466913	LOC100288142andNBPF12	0.00766892	0.0237503
LIHC	chr1	146466917	LOC100288142andNBPF12	0.0118202	0.0328936
LIHC	chr1	146570827	NBPF13P	0.00109363	0.00594688
LIHC	chr1	148595576	NBPF15andNBPF16	0.000241645	0.00198857
LIHC	chr1	148595651	NBPF15andNBPF16	0.000164775	0.00150289
LIHC	chr1	148595664	NBPF15andNBPF16	0.00617705	0.0203054
LIHC	chr1	149913459	OTUD7B	0.00579348	0.0194465
LIHC	chr1	149913720	OTUD7B	0.000238156	0.00198857
LIHC	chr1	150281056	MRPS21	0.0109361	0.0308861
LIHC	chr1	150281079	MRPS21	0.0169588	0.0429304
LIHC	chr1	150281095	MRPS21	3.3e-06	8.15987e-05
LIHC	chr1	150281192	MRPS21	0.0118748	0.0330184
LIHC	chr1	150281203	MRPS21	0.000653553	0.00408948
LIHC	chr1	150281450	MRPS21	0.00255487	0.0110011
LIHC	chr1	150281533	MRPS21	0.00368775	0.0139957
LIHC	chr1	150281695	MRPS21	0.0030973	0.0124087
LIHC	chr1	150281950	MRPS21(dist=1131)andPRPF3(dist=11978)	0.00137599	0.00702775
LIHC	chr1	150390508	RPRD2	0.00370275	0.0140404
LIHC	chr1	150593887	ENSA	6.34e-06	0.000132308
LIHC	chr1	150593888	ENSA	1.83e-05	0.000298947
LIHC	chr1	150593890	ENSA	0.000352734	0.00261942
LIHC	chr1	150594001	ENSA	0.0103281	0.029457
LIHC	chr1	150594025	ENSA	5.77e-08	3.54637e-06
LIHC	chr1	150594031	ENSA	5.07e-05	0.000648982
LIHC	chr1	150703494	CTSS	0.00183045	0.00859607
LIHC	chr1	150703585	CTSS	3.37e-05	0.000477869
LIHC	chr1	150703661	CTSS	0.0192586	0.0472336
LIHC	chr1	150703752	CTSS	0.014734	0.0384308
LIHC	chr1	150703862	CTSS	4.13e-05	0.000554986
LIHC	chr1	150704412	CTSS	7.7e-05	0.000865606
LIHC	chr1	150704413	CTSS	0.00046679	0.00321387
LIHC	chr1	150704418	CTSS	0.000638536	0.00401044
LIHC	chr1	150704508	CTSS	0.000837461	0.00491739
LIHC	chr1	150704568	CTSS	0.00939424	0.0276115
LIHC	chr1	150704585	CTSS	0.0135832	0.0363847
LIHC	chr1	150704587	CTSS	0.0144552	0.0379087
LIHC	chr1	150705152	CTSS	0.00477448	0.0168933
LIHC	chr1	150705264	CTSS	0.00736274	0.0229804
LIHC	chr1	150705336	CTSS	0.00728826	0.0229547
LIHC	chr1	150705337	CTSS	0.00259827	0.0110011
LIHC	chr1	150969156	FAM63A	0.00438666	0.0158106
LIHC	chr1	150969157	FAM63A	0.00734675	0.0229547
LIHC	chr1	150969183	FAM63A	0.00947816	0.0277868
LIHC	chr1	150969199	FAM63A	0.00268027	0.0112889
LIHC	chr1	150969202	FAM63A	0.00548103	0.0185779
LIHC	chr1	150969221	FAM63A	0.000137665	0.00131787
LIHC	chr1	150969233	FAM63A	0.00719628	0.0228855
LIHC	chr1	150969252	FAM63A	0.0021787	0.00969424
LIHC	chr1	150969257	FAM63A	0.000164786	0.00150289
LIHC	chr1	150969286	FAM63A	0.000154486	0.00143739
LIHC	chr1	150969293	FAM63A	4.01e-05	0.000547537
LIHC	chr1	150969311	FAM63A	6.64e-07	2.36111e-05
LIHC	chr1	151095753	GABPB2(dist=4746)andSEMA6C(dist=8410)	0.0202541	0.0487526
LIHC	chr1	151095754	GABPB2(dist=4747)andSEMA6C(dist=8409)	0.00871491	0.0260498
LIHC	chr1	151095810	GABPB2(dist=4803)andSEMA6C(dist=8353)	0.0103273	0.029457
LIHC	chr1	151096057	GABPB2(dist=5050)andSEMA6C(dist=8106)	0.012232	0.0334325
LIHC	chr1	151096065	GABPB2(dist=5058)andSEMA6C(dist=8098)	0.000164771	0.00150289
LIHC	chr1	151096073	GABPB2(dist=5066)andSEMA6C(dist=8090)	0.00871376	0.0260498
LIHC	chr1	151096096	GABPB2(dist=5089)andSEMA6C(dist=8067)	0.00521341	0.017892
LIHC	chr1	151096207	GABPB2(dist=5200)andSEMA6C(dist=7956)	0.00368785	0.0139957
LIHC	chr1	151096260	GABPB2(dist=5253)andSEMA6C(dist=7903)	0.00871495	0.0260498
LIHC	chr1	151096269	GABPB2(dist=5262)andSEMA6C(dist=7894)	0.00217865	0.00969424
LIHC	chr1	151096401	GABPB2(dist=5394)andSEMA6C(dist=7762)	0.00309725	0.0124087
LIHC	chr1	151096402	GABPB2(dist=5395)andSEMA6C(dist=7761)	0.00182479	0.00857612
LIHC	chr1	151096477	GABPB2(dist=5470)andSEMA6C(dist=7686)	0.00262857	0.0111029
LIHC	chr1	151096492	GABPB2(dist=5485)andSEMA6C(dist=7671)	0.0110613	0.0311637
LIHC	chr1	151096677	GABPB2(dist=5670)andSEMA6C(dist=7486)	0.00259871	0.0110011
LIHC	chr1	151096693	GABPB2(dist=5686)andSEMA6C(dist=7470)	0.0185055	0.0457248
LIHC	chr1	151096717	GABPB2(dist=5710)andSEMA6C(dist=7446)	0.0202543	0.0487526
LIHC	chr1	151096737	GABPB2(dist=5730)andSEMA6C(dist=7426)	0.00257163	0.0110011
LIHC	chr1	151096738	GABPB2(dist=5731)andSEMA6C(dist=7425)	0.00108868	0.00592953
LIHC	chr1	151096755	GABPB2(dist=5748)andSEMA6C(dist=7408)	0.000507075	0.00341664
LIHC	chr1	151096767	GABPB2(dist=5760)andSEMA6C(dist=7396)	0.00156452	0.00765402
LIHC	chr1	151096777	GABPB2(dist=5770)andSEMA6C(dist=7386)	0.00182442	0.00857612
LIHC	chr1	151096799	GABPB2(dist=5792)andSEMA6C(dist=7364)	0.00141726	0.00720182
LIHC	chr1	151096805	GABPB2(dist=5798)andSEMA6C(dist=7358)	0.000755409	0.00454791
LIHC	chr1	151096825	GABPB2(dist=5818)andSEMA6C(dist=7338)	0.0207624	0.0497553
LIHC	chr1	151096827	GABPB2(dist=5820)andSEMA6C(dist=7336)	0.0198985	0.0484796
LIHC	chr1	151096834	GABPB2(dist=5827)andSEMA6C(dist=7329)	0.0103281	0.029457
LIHC	chr1	151339647	SELENBP1	0.0103277	0.029457
LIHC	chr1	151815010	LOC100132111	0.0025987	0.0110011
LIHC	chr1	151815782	LOC100132111	0.0103282	0.029457
LIHC	chr1	151827910	THEM5(dist=1737)andTHEM4(dist=15433)	1.12e-07	5.75651e-06
LIHC	chr1	151827994	THEM5(dist=1821)andTHEM4(dist=15349)	2.46e-08	1.82676e-06
LIHC	chr1	151828038	THEM5(dist=1865)andTHEM4(dist=15305)	1.33e-08	1.177e-06
LIHC	chr1	151828055	THEM5(dist=1882)andTHEM4(dist=15288)	2.3e-08	1.7409e-06
LIHC	chr1	151828107	THEM5(dist=1934)andTHEM4(dist=15236)	1.52e-12	1.02231e-09
LIHC	chr1	151843689	THEM4	0.0104368	0.0297077
LIHC	chr1	151843692	THEM4	0.0151504	0.0393014
LIHC	chr1	151843693	THEM4	0.00129389	0.00667504
LIHC	chr1	151843754	THEM4	0.016636	0.042308
LIHC	chr1	151846947	THEM4	0.0142067	0.0377322
LIHC	chr1	151846948	THEM4	0.00457876	0.0163529
LIHC	chr1	151846979	THEM4	0.0162422	0.0415294
LIHC	chr1	151862507	THEM4	0.01421	0.0377322
LIHC	chr1	154184608	C1orf43	0.000111831	0.00113356
LIHC	chr1	154454398	SHE	0.00859503	0.0260498
LIHC	chr1	154454628	SHE	0.00920155	0.0271809
LIHC	chr1	154936755	SHC1	0.000199737	0.00173256
LIHC	chr1	154936794	SHC1	0.00438612	0.0158106
LIHC	chr1	154936819	SHC1	0.000512217	0.00341664
LIHC	chr1	154936820	SHC1	0.0103273	0.029457
LIHC	chr1	154936829	SHC1	0.0144784	0.0379087
LIHC	chr1	154937141	SHC1	0.0186006	0.0459115
LIHC	chr1	154937197	SHC1	0.0030972	0.0124087
LIHC	chr1	154937208	SHC1	0.00217859	0.00969424
LIHC	chr1	154937223	SHC1	0.000425316	0.00299323
LIHC	chr1	154937237	SHC1	0.00871567	0.0260498
LIHC	chr1	155104804	EFNA1	0.00905203	0.0268099
LIHC	chr1	155104805	EFNA1	0.0108233	0.030652
LIHC	chr1	155104825	EFNA1	0.00142715	0.0072372
LIHC	chr1	155104828	EFNA1	1.68e-05	0.000284922
LIHC	chr1	155104886	EFNA1	0.00148771	0.00747029
LIHC	chr1	155104904	EFNA1	2.4e-05	0.000365907
LIHC	chr1	155104907	EFNA1	7.16e-06	0.000147331
LIHC	chr1	155104959	EFNA1	0.0002807	0.00224751
LIHC	chr1	155104976	EFNA1	0.00105144	0.00582801
LIHC	chr1	155105088	EFNA1	0.00196041	0.00905573
LIHC	chr1	155105139	EFNA1	0.0166545	0.0423217
LIHC	chr1	155105150	EFNA1	0.00576145	0.0193527
LIHC	chr1	155105153	EFNA1	0.00247285	0.010738
LIHC	chr1	155105164	EFNA1	0.00163094	0.00792741
LIHC	chr1	155105185	EFNA1	0.00215051	0.00969424
LIHC	chr1	155105208	EFNA1	0.000324898	0.00249775
LIHC	chr1	155105227	EFNA1	0.00342383	0.0134127
LIHC	chr1	155105231	EFNA1	7.72e-06	0.000157341
LIHC	chr1	155105246	EFNA1	9.43e-06	0.00018376
LIHC	chr1	155105262	EFNA1	0.000371127	0.00272669
LIHC	chr1	155105410	EFNA1	0.00351427	0.0136782
LIHC	chr1	155105448	EFNA1	0.00348961	0.0136048
LIHC	chr1	155105466	EFNA1	0.00426771	0.0156849
LIHC	chr1	155105467	EFNA1	0.000464725	0.00320434
LIHC	chr1	155105516	EFNA1	0.0198146	0.0483302
LIHC	chr1	155279696	FDPS	4.27e-05	0.000569172
LIHC	chr1	155282659	FDPS	0.00521431	0.017892
LIHC	chr1	155284160	FDPS	0.0171283	0.0429599
LIHC	chr1	155284232	FDPS	0.0171283	0.0429599
LIHC	chr1	155284400	FDPS	0.00438673	0.0158106
LIHC	chr1	155284405	FDPS	0.00619281	0.0203054
LIHC	chr1	155284502	FDPS	0.00871552	0.0260498
LIHC	chr1	155284622	FDPS	0.000740407	0.00447372
LIHC	chr1	155285053	FDPS	0.000352709	0.00261942
LIHC	chr1	155285059	FDPS	0.000292185	0.00228816
LIHC	chr1	155285080	FDPS	0.00521431	0.017892
LIHC	chr1	155285081	FDPS	0.00368787	0.0139957
LIHC	chr1	155285089	FDPS	0.0015268	0.00752464
LIHC	chr1	155285126	FDPS	0.00521425	0.017892
LIHC	chr1	155285216	FDPS	0.0030971	0.0124087
LIHC	chr1	155285224	FDPS	0.0122317	0.0334325
LIHC	chr1	155285327	FDPS	0.00521425	0.017892
LIHC	chr1	155285353	FDPS	0.00106553	0.00582801
LIHC	chr1	155285380	FDPS	0.00521416	0.017892
LIHC	chr1	155285386	FDPS	0.020254	0.0487526
LIHC	chr1	155285394	FDPS	0.0202545	0.0487526
LIHC	chr1	155285535	FDPS	0.00182462	0.00857612
LIHC	chr1	155285537	FDPS	0.00217882	0.00969424
LIHC	chr1	155285538	FDPS	0.00734941	0.0229547
LIHC	chr1	155285551	FDPS	0.00871524	0.0260498
LIHC	chr1	155285608	FDPS	0.00182431	0.00857612
LIHC	chr1	155285799	FDPS	2.48e-05	0.000375671
LIHC	chr1	155285862	FDPS	0.0103286	0.029457
LIHC	chr1	155285899	FDPS	0.000740424	0.00447372
LIHC	chr1	155285926	FDPS	0.000241703	0.00198857
LIHC	chr1	155285935	FDPS	2.76e-05	0.000406319
LIHC	chr1	155285966	FDPS	0.00217882	0.00969424
LIHC	chr1	155285967	FDPS	0.0171286	0.0429599
LIHC	chr1	155285991	FDPS	0.012232	0.0334325
LIHC	chr1	155285998	FDPS	0.00309734	0.0124087
LIHC	chr1	155286314	FDPS	0.00259896	0.0110011
LIHC	chr1	155286322	FDPS	0.00182453	0.00857612
LIHC	chr1	155286385	FDPS	0.000900802	0.0051689
LIHC	chr1	155286390	FDPS	2.24e-05	0.000347539
LIHC	chr1	155286391	FDPS	0.00127605	0.00661428
LIHC	chr1	155286451	FDPS	0.00619281	0.0203054
LIHC	chr1	155286471	FDPS	2.25e-05	0.000347539
LIHC	chr1	155286521	FDPS	4.46e-05	0.000590486
LIHC	chr1	155286528	FDPS	0.000512205	0.00341664
LIHC	chr1	155706284	DAP3	0.00368775	0.0139957
LIHC	chr1	155706347	DAP3	0.000199711	0.00173256
LIHC	chr1	155706349	DAP3	0.00106549	0.00582801
LIHC	chr1	155706353	DAP3	0.000241726	0.00198857
LIHC	chr1	155706357	DAP3	0.0144784	0.0379087
LIHC	chr1	155706374	DAP3	0.00619291	0.0203054
LIHC	chr1	155706410	DAP3	0.00619257	0.0203054
LIHC	chr1	155706417	DAP3	9.19e-05	0.00098557
LIHC	chr1	155706443	DAP3	0.00152645	0.00752464
LIHC	chr1	155706446	DAP3	0.0122322	0.0334325
LIHC	chr1	155706460	DAP3	1.83e-05	0.000298947
LIHC	chr1	155853061	SYT11	0.0202538	0.0487526
LIHC	chr1	155979035	SSR2	0.000657494	0.00410868
LIHC	chr1	156344517	RHBG	0.00301463	0.0123588
LIHC	chr1	156350093	RHBG	0.00368798	0.0139957
LIHC	chr1	156350153	RHBG	0.0043872	0.0158106
LIHC	chr1	156350154	RHBG	0.00259906	0.0110011
LIHC	chr1	156350252	RHBG	0.00368798	0.0139957
LIHC	chr1	156350352	RHBG	0.00106558	0.00582801
LIHC	chr1	156350367	RHBG	0.00127611	0.00661428
LIHC	chr1	156350744	RHBG	0.00309743	0.0124087
LIHC	chr1	156350755	RHBG	0.00127617	0.00661428
LIHC	chr1	156350808	RHBG	0.00871571	0.0260498
LIHC	chr1	156350816	RHBG	0.00259908	0.0110011
LIHC	chr1	156350820	RHBG	0.00734961	0.0229547
LIHC	chr1	156350852	RHBG	0.00182486	0.00857612
LIHC	chr1	156692521	ISG20L2	0.0152049	0.0394144
LIHC	chr1	156692594	ISG20L2	1.83e-05	0.000298947
LIHC	chr1	156705237	RRNAD1	0.017128	0.0429599
LIHC	chr1	157680047	FCRL3(dist=9400)andFCRL2(dist=35476)	0.00173631	0.008338
LIHC	chr1	15898474	AGMAT	0.000405996	0.00293074
LIHC	chr1	15898477	AGMAT	0.00541414	0.0183999
LIHC	chr1	15898553	AGMAT	4.87e-08	3.09837e-06
LIHC	chr1	15898557	AGMAT	0.00111594	0.00603778
LIHC	chr1	15898907	AGMAT	0.000143192	0.00136027
LIHC	chr1	15898909	AGMAT	0.000536888	0.0035481
LIHC	chr1	15898917	AGMAT	6.81e-05	0.00079914
LIHC	chr1	15898975	AGMAT	0.000206627	0.00177973
LIHC	chr1	15898979	AGMAT	0.0120495	0.0333662
LIHC	chr1	15898983	AGMAT	0.00185197	0.00867842
LIHC	chr1	15899028	AGMAT	0.00106803	0.00584004
LIHC	chr1	15899030	AGMAT	0.00363409	0.0139957
LIHC	chr1	15899031	AGMAT	0.00345311	0.0135072
LIHC	chr1	15899037	AGMAT	0.0199896	0.0486664
LIHC	chr1	15899097	AGMAT	4.65e-09	5.39217e-07
LIHC	chr1	15899387	AGMAT	0.0204627	0.0491371
LIHC	chr1	15899537	AGMAT	0.00155705	0.00763157
LIHC	chr1	15899588	AGMAT	1.48e-06	4.38781e-05
LIHC	chr1	15899691	AGMAT	0.0021467	0.00969424
LIHC	chr1	15899715	AGMAT	0.00963697	0.0281282
LIHC	chr1	15899747	AGMAT	1.18e-05	0.000218546
LIHC	chr1	15899751	AGMAT	0.00455216	0.0162829
LIHC	chr1	1594975	SLC35E2B	0.00685186	0.0220225
LIHC	chr1	1594999	SLC35E2B	0.00418902	0.0154529
LIHC	chr1	1595021	SLC35E2B	0.000569973	0.00371976
LIHC	chr1	1595031	SLC35E2B	0.00646091	0.0210243
LIHC	chr1	1595137	SLC35E2B	0.00279664	0.011658
LIHC	chr1	1595145	SLC35E2B	0.0188766	0.0464757
LIHC	chr1	1595462	SLC35E2B	0.00221033	0.00979502
LIHC	chr1	1595500	SLC35E2B	0.0037841	0.0142639
LIHC	chr1	1595522	SLC35E2B	0.0109318	0.0308814
LIHC	chr1	1595527	SLC35E2B	0.000328016	0.00251597
LIHC	chr1	1595575	SLC35E2B	0.00377131	0.0142284
LIHC	chr1	1595584	SLC35E2B	0.00215718	0.00969424
LIHC	chr1	1595586	SLC35E2B	5.15e-06	0.000112983
LIHC	chr1	159996463	PIGM	9.23e-06	0.000180761
LIHC	chr1	159996496	PIGM	0.00604137	0.0201151
LIHC	chr1	159996535	PIGM	0.0147411	0.0384321
LIHC	chr1	159996575	PIGM	0.000709726	0.00436213
LIHC	chr1	159996674	PIGM	0.00192215	0.00891046
LIHC	chr1	159996696	PIGM	6.64e-05	0.00078585
LIHC	chr1	159996710	PIGM	0.00169058	0.00816332
LIHC	chr1	159996756	PIGM	0.00325791	0.0128981
LIHC	chr1	159996762	PIGM	0.00280873	0.0117043
LIHC	chr1	159996805	PIGM	0.000493756	0.00336411
LIHC	chr1	159996861	PIGM	0.00337872	0.0132802
LIHC	chr1	159996879	PIGM	0.00734901	0.0229547
LIHC	chr1	159999654	PIGM	0.000859323	0.00502577
LIHC	chr1	159999790	PIGM	0.00131789	0.00677656
LIHC	chr1	160259505	COPA	0.00172638	0.00830126
LIHC	chr1	160259513	COPA	0.00477753	0.0169016
LIHC	chr1	160259519	COPA	0.00300922	0.0123431
LIHC	chr1	160259521	COPA	0.000279679	0.00224086
LIHC	chr1	160302244	COPA	3.4e-12	1.9521e-09
LIHC	chr1	160965379	F11R	0.0177835	0.0442802
LIHC	chr1	160965404	F11R	0.00334315	0.0131712
LIHC	chr1	160966732	F11R	0.00221615	0.00981158
LIHC	chr1	160967918	F11R	0.012901	0.0349068
LIHC	chr1	161094490	NIT1	0.000346267	0.00261942
LIHC	chr1	161094630	NIT1	0.00371217	0.0140625
LIHC	chr1	161094704	NIT1	3.34e-05	0.000477665
LIHC	chr1	161338766	C1orf192(dist=1093)andFCGR2A(dist=136439)	0.015428	0.039857
LIHC	chr1	161338962	C1orf192(dist=1289)andFCGR2A(dist=136243)	0.00273671	0.0114732
LIHC	chr1	161339923	C1orf192(dist=2250)andFCGR2A(dist=135282)	0.00259889	0.0110011
LIHC	chr1	161339929	C1orf192(dist=2256)andFCGR2A(dist=135276)	0.00259906	0.0110011
LIHC	chr1	161339930	C1orf192(dist=2257)andFCGR2A(dist=135275)	0.00734917	0.0229547
LIHC	chr1	161340036	C1orf192(dist=2363)andFCGR2A(dist=135169)	0.000888675	0.00511397
LIHC	chr1	161340061	C1orf192(dist=2388)andFCGR2A(dist=135144)	0.0144778	0.0379087
LIHC	chr1	161340670	C1orf192(dist=2997)andFCGR2A(dist=134535)	0.0189005	0.0465109
LIHC	chr1	164563729	PBX1	0.00590799	0.0197464
LIHC	chr1	1660850	SLC35E2	0.000268441	0.00216928
LIHC	chr1	1660855	SLC35E2	0.00241811	0.0105353
LIHC	chr1	1660887	SLC35E2	0.00711735	0.0226869
LIHC	chr1	1660888	SLC35E2	0.0149171	0.038818
LIHC	chr1	1661047	SLC35E2	0.00502299	0.017609
LIHC	chr1	1661099	SLC35E2	0.00455808	0.0162991
LIHC	chr1	1661104	SLC35E2	0.00123149	0.0065294
LIHC	chr1	1661410	SLC35E2	6.12e-07	2.21298e-05
LIHC	chr1	1661492	SLC35E2	3.18e-06	7.98903e-05
LIHC	chr1	166717805	FMO9P(dist=123332)andPOGK(dist=90919)	0.00239764	0.0104636
LIHC	chr1	166883188	ILDR2	2.25e-05	0.000347539
LIHC	chr1	167394442	POU2F1	0.0135568	0.0363461
LIHC	chr1	168213597	SFT2D2(dist=1509)andANKRD36BP1(dist=1222)	0.0202531	0.0487526
LIHC	chr1	168213651	SFT2D2(dist=1563)andANKRD36BP1(dist=1168)	0.0171286	0.0429599
LIHC	chr1	168218494	ANKRD36BP1(dist=1826)andTBX19(dist=31784)	0.00145749	0.00735935
LIHC	chr1	168218509	ANKRD36BP1(dist=1841)andTBX19(dist=31769)	0.000505919	0.00341664
LIHC	chr1	168218522	ANKRD36BP1(dist=1854)andTBX19(dist=31756)	4.14e-09	4.97222e-07
LIHC	chr1	168218543	ANKRD36BP1(dist=1875)andTBX19(dist=31735)	6.56e-07	2.33619e-05
LIHC	chr1	168218573	ANKRD36BP1(dist=1905)andTBX19(dist=31705)	0.000531036	0.0035203
LIHC	chr1	168218574	ANKRD36BP1(dist=1906)andTBX19(dist=31704)	0.00218005	0.00969735
LIHC	chr1	168218613	ANKRD36BP1(dist=1945)andTBX19(dist=31665)	0.00367586	0.0139957
LIHC	chr1	168218615	ANKRD36BP1(dist=1947)andTBX19(dist=31663)	0.00136501	0.00698074
LIHC	chr1	168218654	ANKRD36BP1(dist=1986)andTBX19(dist=31624)	0.000706451	0.00434718
LIHC	chr1	168218735	ANKRD36BP1(dist=2067)andTBX19(dist=31543)	0.000616096	0.00390166
LIHC	chr1	168218736	ANKRD36BP1(dist=2068)andTBX19(dist=31542)	0.000292138	0.00228816
LIHC	chr1	168218748	ANKRD36BP1(dist=2080)andTBX19(dist=31530)	0.000806014	0.00477322
LIHC	chr1	168220327	ANKRD36BP1(dist=3659)andTBX19(dist=29951)	0.000284019	0.00227022
LIHC	chr1	168220332	ANKRD36BP1(dist=3664)andTBX19(dist=29946)	9.33e-06	0.000182567
LIHC	chr1	168220340	ANKRD36BP1(dist=3672)andTBX19(dist=29938)	1.45e-05	0.000255295
LIHC	chr1	168220341	ANKRD36BP1(dist=3673)andTBX19(dist=29937)	0.00119393	0.00636751
LIHC	chr1	168220363	ANKRD36BP1(dist=3695)andTBX19(dist=29915)	0.000867647	0.00506683
LIHC	chr1	168220371	ANKRD36BP1(dist=3703)andTBX19(dist=29907)	0.0129592	0.035028
LIHC	chr1	168220475	ANKRD36BP1(dist=3807)andTBX19(dist=29803)	0.00938816	0.0275971
LIHC	chr1	168220498	ANKRD36BP1(dist=3830)andTBX19(dist=29780)	6.16e-05	0.000743432
LIHC	chr1	168232118	ANKRD36BP1(dist=15450)andTBX19(dist=18160)	0.00521384	0.017892
LIHC	chr1	168232192	ANKRD36BP1(dist=15524)andTBX19(dist=18086)	0.00182427	0.00857612
LIHC	chr1	168232218	ANKRD36BP1(dist=15550)andTBX19(dist=18060)	0.00734937	0.0229547
LIHC	chr1	168232326	ANKRD36BP1(dist=15658)andTBX19(dist=17952)	0.000740332	0.00447372
LIHC	chr1	16889646	NBPF1	0.00576878	0.0193691
LIHC	chr1	173769034	CENPL	0.00619291	0.0203054
LIHC	chr1	173769138	CENPL	8.57e-07	2.81364e-05
LIHC	chr1	173769277	CENPL	0.0144788	0.0379087
LIHC	chr1	173827747	DARS2	0.000241709	0.00198857
LIHC	chr1	173827748	DARS2	0.000616067	0.00390166
LIHC	chr1	173827821	DARS2	0.000292049	0.00228816
LIHC	chr1	173827827	DARS2	0.0144783	0.0379087
LIHC	chr1	173827880	DARS2	6.34e-06	0.000132308
LIHC	chr1	173827881	DARS2	1.35e-06	4.06901e-05
LIHC	chr1	173827988	DARS2	0.00152669	0.00752464
LIHC	chr1	173828262	DARS2	6.19e-05	0.000743432
LIHC	chr1	173828396	DARS2	0.00217875	0.00969424
LIHC	chr1	173828455	DARS2	1.48e-05	0.000257116
LIHC	chr1	173828457	DARS2	1.69e-06	4.81047e-05
LIHC	chr1	173828791	DARS2(dist=1109)andGAS5-AS1(dist=3595)	0.00279616	0.011658
LIHC	chr1	173828802	DARS2(dist=1120)andGAS5-AS1(dist=3584)	0.000888279	0.00511397
LIHC	chr1	173828806	DARS2(dist=1124)andGAS5-AS1(dist=3580)	0.00217873	0.00969424
LIHC	chr1	173828839	DARS2(dist=1157)andGAS5-AS1(dist=3547)	9.19e-05	0.00098557
LIHC	chr1	173828847	DARS2(dist=1165)andGAS5-AS1(dist=3539)	6.16e-08	3.7086e-06
LIHC	chr1	173828857	DARS2(dist=1175)andGAS5-AS1(dist=3529)	3.92e-06	9.3587e-05
LIHC	chr1	173828882	DARS2(dist=1200)andGAS5-AS1(dist=3504)	1.13e-07	5.78265e-06
LIHC	chr1	173828886	DARS2(dist=1204)andGAS5-AS1(dist=3500)	2.31e-07	1.0183e-05
LIHC	chr1	173828900	DARS2(dist=1218)andGAS5-AS1(dist=3486)	8.56e-07	2.81364e-05
LIHC	chr1	173828912	DARS2(dist=1230)andGAS5-AS1(dist=3474)	2.12e-06	5.77602e-05
LIHC	chr1	173828922	DARS2(dist=1240)andGAS5-AS1(dist=3464)	2.12e-06	5.77602e-05
LIHC	chr1	173828924	DARS2(dist=1242)andGAS5-AS1(dist=3462)	0.00127611	0.00661428
LIHC	chr1	173829017	DARS2(dist=1335)andGAS5-AS1(dist=3369)	2.66e-07	1.13848e-05
LIHC	chr1	173829035	DARS2(dist=1353)andGAS5-AS1(dist=3351)	3.92e-07	1.5561e-05
LIHC	chr1	173829045	DARS2(dist=1363)andGAS5-AS1(dist=3341)	1.24e-07	6.21055e-06
LIHC	chr1	173831776	GAS5-AS1	0.000888378	0.00511397
LIHC	chr1	173832181	GAS5-AS1;GAS5	5.82e-05	0.000722589
LIHC	chr1	173832374	GAS5-AS1;GAS5andSNORD81	0.000888706	0.00511397
LIHC	chr1	173832381	GAS5-AS1;GAS5andSNORD81	0.00182463	0.00857612
LIHC	chr1	173833166	GAS5	0.00320348	0.0127338
LIHC	chr1	179042482	FAM20B	0.000508638	0.00341664
LIHC	chr1	179042512	FAM20B	0.00961464	0.028083
LIHC	chr1	179042544	FAM20B	0.000215592	0.00184212
LIHC	chr1	179042580	FAM20B	0.000292161	0.00228816
LIHC	chr1	179042590	FAM20B	0.000146128	0.00137925
LIHC	chr1	179042592	FAM20B	0.000624601	0.00394397
LIHC	chr1	179042687	FAM20B	7.37e-05	0.000848361
LIHC	chr1	179042692	FAM20B	7.04e-05	0.000817974
LIHC	chr1	179042697	FAM20B	5.4e-05	0.000679038
LIHC	chr1	179042701	FAM20B	0.000101306	0.00105894
LIHC	chr1	179042732	FAM20B	0.00998552	0.0288913
LIHC	chr1	179044004	FAM20B	0.0155354	0.0400682
LIHC	chr1	179044100	FAM20B	0.00546126	0.0185189
LIHC	chr1	179044165	FAM20B	0.00577943	0.0194021
LIHC	chr1	179044166	FAM20B	0.00156215	0.00764831
LIHC	chr1	179044175	FAM20B	0.000336356	0.00256323
LIHC	chr1	179044176	FAM20B	0.000585966	0.00380514
LIHC	chr1	179044180	FAM20B	2.86e-05	0.000420252
LIHC	chr1	179044181	FAM20B	4.19e-05	0.00056105
LIHC	chr1	179044196	FAM20B	6.67e-07	2.36818e-05
LIHC	chr1	179044206	FAM20B	2.71e-05	0.000405037
LIHC	chr1	179044212	FAM20B	0.00387922	0.014546
LIHC	chr1	179044216	FAM20B	1.38e-06	4.14352e-05
LIHC	chr1	179044233	FAM20B	2.65e-05	0.000397838
LIHC	chr1	179044239	FAM20B	0.000751335	0.00453033
LIHC	chr1	179044242	FAM20B	6.31e-09	6.60166e-07
LIHC	chr1	179044252	FAM20B	1e-08	9.34127e-07
LIHC	chr1	179044255	FAM20B	8.82e-05	0.000962108
LIHC	chr1	179070646	ABL2	0.00035612	0.00263784
LIHC	chr1	179070647	ABL2	0.000775804	0.00463161
LIHC	chr1	179070795	ABL2	0.000740415	0.00447372
LIHC	chr1	179325687	SOAT1	0.0208771	0.0499844
LIHC	chr1	179325847	SOAT1	0.0110621	0.0311637
LIHC	chr1	179325848	SOAT1	0.0101587	0.0292987
LIHC	chr1	179325863	SOAT1	0.0102313	0.029457
LIHC	chr1	179325886	SOAT1	0.014298	0.0378996
LIHC	chr1	179326278	SOAT1	0.0150555	0.0391108
LIHC	chr1	179326295	SOAT1	0.0070597	0.0225368
LIHC	chr1	179326296	SOAT1	0.00130387	0.00671181
LIHC	chr1	179326455	SOAT1	0.00771231	0.0238598
LIHC	chr1	179326467	SOAT1	0.00328588	0.0129956
LIHC	chr1	179326499	SOAT1	0.0175094	0.0437178
LIHC	chr1	179326538	SOAT1	0.0029679	0.0122034
LIHC	chr1	179326795	SOAT1	0.00996072	0.0288372
LIHC	chr1	179326847	SOAT1	0.000772376	0.00461934
LIHC	chr1	179326882	SOAT1	0.0203061	0.0488358
LIHC	chr1	179326886	SOAT1	0.0160402	0.0411145
LIHC	chr1	179828992	TOR1AIP2	0.000526151	0.00349374
LIHC	chr1	179829001	TOR1AIP2	0.00381123	0.01435
LIHC	chr1	179829035	TOR1AIP2	0.00724836	0.0229547
LIHC	chr1	179829087	TOR1AIP2	0.000199711	0.00173256
LIHC	chr1	179829093	TOR1AIP2	0.00284359	0.0118093
LIHC	chr1	179829096	TOR1AIP2	0.00361232	0.0139957
LIHC	chr1	179829136	TOR1AIP2	0.000237306	0.00198797
LIHC	chr1	179829139	TOR1AIP2	0.000198426	0.00173256
LIHC	chr1	179829140	TOR1AIP2	0.000278106	0.00222977
LIHC	chr1	179829141	TOR1AIP2	0.000476425	0.00326874
LIHC	chr1	179829229	TOR1AIP2	0.00283699	0.0117949
LIHC	chr1	179829388	TOR1AIP2	0.00545074	0.0184972
LIHC	chr1	179829400	TOR1AIP2	0.0147362	0.0384321
LIHC	chr1	179829426	TOR1AIP2	0.0182738	0.0452852
LIHC	chr1	179829435	TOR1AIP2	0.00679186	0.0218729
LIHC	chr1	179829452	TOR1AIP2	0.000165204	0.00150499
LIHC	chr1	179829495	TOR1AIP2	0.0193386	0.0473812
LIHC	chr1	179829508	TOR1AIP2	0.0132602	0.0356818
LIHC	chr1	179829517	TOR1AIP2	0.00309704	0.0124087
LIHC	chr1	179829534	TOR1AIP2	0.000512171	0.00341664
LIHC	chr1	179829567	TOR1AIP2	0.00029216	0.00228816
LIHC	chr1	179829579	TOR1AIP2	0.00368734	0.0139957
LIHC	chr1	179829584	TOR1AIP2	0.000292149	0.00228816
LIHC	chr1	179829595	TOR1AIP2	0.000117401	0.00118053
LIHC	chr1	179832278	TOR1AIP2	0.0130159	0.035153
LIHC	chr1	180263302	ACBD6	0.00422304	0.0155599
LIHC	chr1	184761143	FAM129A	0.0113007	0.0317157
LIHC	chr1	184761167	FAM129A	0.000512223	0.00341664
LIHC	chr1	184761270	FAM129A	0.000584575	0.00380135
LIHC	chr1	184761271	FAM129A	0.0031791	0.0126572
LIHC	chr1	184761288	FAM129A	0.0144787	0.0379087
LIHC	chr1	184761293	FAM129A	0.00385914	0.0144834
LIHC	chr1	184761348	FAM129A	0.0202551	0.0487526
LIHC	chr1	184761350	FAM129A	0.00116837	0.00625788
LIHC	chr1	184761361	FAM129A	0.00438646	0.0158106
LIHC	chr1	184762485	FAM129A	0.012232	0.0334325
LIHC	chr1	184762487	FAM129A	0.0166554	0.0423217
LIHC	chr1	184762524	FAM129A	0.00346912	0.0135441
LIHC	chr1	184762568	FAM129A	0.00217886	0.00969424
LIHC	chr1	184762590	FAM129A	0.00127849	0.00662024
LIHC	chr1	193059202	TROVE2	0.00269577	0.0113379
LIHC	chr1	19542344	EMC1	0.000207579	0.00178662
LIHC	chr1	19542621	EMC1	0.0147427	0.0384321
LIHC	chr1	19542679	EMC1	0.01509	0.0391598
LIHC	chr1	19542693	EMC1	0.00186863	0.00872768
LIHC	chr1	19543349	EMC1	0.00040039	0.00289667
LIHC	chr1	19543353	EMC1	0.000539004	0.00355872
LIHC	chr1	19543356	EMC1	0.00670548	0.0216436
LIHC	chr1	19543360	EMC1	0.00382854	0.0143988
LIHC	chr1	19543465	EMC1	0.000797539	0.00473137
LIHC	chr1	19585510	MRTO4	0.0162659	0.0415641
LIHC	chr1	19585519	MRTO4	0.00218239	0.00970592
LIHC	chr1	19585622	MRTO4	0.011905	0.0330709
LIHC	chr1	19586437	MRTO4	0.0165586	0.0421435
LIHC	chr1	19586441	MRTO4	0.0187488	0.0462143
LIHC	chr1	19586532	MRTO4	0.0101974	0.0293922
LIHC	chr1	200000369	NR5A2	0.00617749	0.0203054
LIHC	chr1	200000806	NR5A2	0.0171286	0.0429599
LIHC	chr1	200000807	NR5A2	0.00719789	0.0228855
LIHC	chr1	201964674	RNPEP	0.0202549	0.0487526
LIHC	chr1	201964730	RNPEP	0.00438686	0.0158106
LIHC	chr1	201984653	ELF3	0.0202881	0.0488025
LIHC	chr1	202848452	RABIF	0.00572097	0.0192361
LIHC	chr1	204520194	MDM4	0.0171288	0.0429599
LIHC	chr1	204520232	MDM4	0.0144785	0.0379087
LIHC	chr1	204520235	MDM4	0.0202551	0.0487526
LIHC	chr1	204520274	MDM4	0.00106541	0.00582801
LIHC	chr1	204520300	MDM4	0.0144783	0.0379087
LIHC	chr1	204520442	MDM4	0.000278073	0.00222977
LIHC	chr1	204521151	MDM4	0.000914943	0.00523142
LIHC	chr1	204521159	MDM4	4.88e-05	0.000636075
LIHC	chr1	204521160	MDM4	4.57e-05	0.000602677
LIHC	chr1	204521185	MDM4	0.00316123	0.0126024
LIHC	chr1	204521210	MDM4	0.000888623	0.00511397
LIHC	chr1	204521216	MDM4	0.0013914	0.00709565
LIHC	chr1	204521223	MDM4	0.020114	0.0487526
LIHC	chr1	204521224	MDM4	0.0157114	0.0404513
LIHC	chr1	204521322	MDM4	0.0122996	0.0335806
LIHC	chr1	204521346	MDM4	0.0144787	0.0379087
LIHC	chr1	204521351	MDM4	0.00734885	0.0229547
LIHC	chr1	204521415	MDM4	0.00560223	0.0189097
LIHC	chr1	204521710	MDM4	0.00619291	0.0203054
LIHC	chr1	204521711	MDM4	9.02e-05	0.00098165
LIHC	chr1	204521712	MDM4	0.0005749	0.00374879
LIHC	chr1	204521724	MDM4	0.00298905	0.0122708
LIHC	chr1	204524715	MDM4	0.00734929	0.0229547
LIHC	chr1	204524737	MDM4	0.00217888	0.00969424
LIHC	chr1	204524738	MDM4	0.00368779	0.0139957
LIHC	chr1	204524746	MDM4	0.00217885	0.00969424
LIHC	chr1	204524806	MDM4	0.00898085	0.0266493
LIHC	chr1	204524817	MDM4	0.00294041	0.0121115
LIHC	chr1	204524866	MDM4	1.48e-05	0.000257116
LIHC	chr1	204524872	MDM4	0.0019848	0.00913432
LIHC	chr1	204524882	MDM4	4.14e-05	0.000554986
LIHC	chr1	204524899	MDM4	0.00734933	0.0229547
LIHC	chr1	204524914	MDM4	0.0103285	0.029457
LIHC	chr1	204524934	MDM4	0.0122299	0.0334325
LIHC	chr1	204524950	MDM4	1.2e-05	0.000219317
LIHC	chr1	204525506	MDM4	0.00127274	0.00661428
LIHC	chr1	204525548	MDM4	8.06e-05	0.000896656
LIHC	chr1	204525571	MDM4	0.00124818	0.00659387
LIHC	chr1	204525579	MDM4	0.000165119	0.0015048
LIHC	chr1	204525591	MDM4	3.24e-05	0.000466196
LIHC	chr1	204525618	MDM4	3.52e-05	0.00049234
LIHC	chr1	204525626	MDM4	3.03e-06	7.71929e-05
LIHC	chr1	204525629	MDM4	0.00158523	0.00774199
LIHC	chr1	204525639	MDM4	1.65e-06	4.77162e-05
LIHC	chr1	204525641	MDM4	6.8e-05	0.000798364
LIHC	chr1	204525647	MDM4	0.00185986	0.00870573
LIHC	chr1	204525648	MDM4	0.00046439	0.00320297
LIHC	chr1	204525649	MDM4	2.35e-07	1.034e-05
LIHC	chr1	204525664	MDM4	8.42e-05	0.0009275
LIHC	chr1	204525665	MDM4	0.000109988	0.00113111
LIHC	chr1	204525666	MDM4	8.31e-09	8.0501e-07
LIHC	chr1	204525667	MDM4	4.08e-10	7.74542e-08
LIHC	chr1	204525669	MDM4	1.27e-07	6.30713e-06
LIHC	chr1	204525672	MDM4	8.56e-08	4.67523e-06
LIHC	chr1	204525673	MDM4	0.000110763	0.00113356
LIHC	chr1	204525674	MDM4	0.00436981	0.0158106
LIHC	chr1	204525687	MDM4	3.53e-06	8.60209e-05
LIHC	chr1	204525709	MDM4	2.35e-05	0.000359681
LIHC	chr1	204525713	MDM4	7.14e-07	2.46069e-05
LIHC	chr1	204525717	MDM4	2.68e-09	3.4922e-07
LIHC	chr1	204525733	MDM4	5.96e-05	0.000734931
LIHC	chr1	204525744	MDM4	1.36e-09	1.98847e-07
LIHC	chr1	204525752	MDM4	9.69e-05	0.00102334
LIHC	chr1	204525765	MDM4	3.36e-06	8.29082e-05
LIHC	chr1	204525769	MDM4	0.000660138	0.00412192
LIHC	chr1	204525774	MDM4	0.000299976	0.002339
LIHC	chr1	204525781	MDM4	1.6e-05	0.000273721
LIHC	chr1	204525784	MDM4	6.96e-05	0.000812288
LIHC	chr1	204525790	MDM4	1.75e-06	4.93945e-05
LIHC	chr1	204525944	MDM4	7.87e-05	0.00088135
LIHC	chr1	204526552	MDM4	0.0198911	0.0484666
LIHC	chr1	204526554	MDM4	0.00101387	0.00568519
LIHC	chr1	204526556	MDM4	0.0046412	0.0165486
LIHC	chr1	204526582	MDM4	7.76e-07	2.62457e-05
LIHC	chr1	204526595	MDM4	5.48e-09	6.08487e-07
LIHC	chr1	204526610	MDM4	1.68e-05	0.000284922
LIHC	chr1	204526611	MDM4	1.71e-08	1.40428e-06
LIHC	chr1	204526631	MDM4	0.00133911	0.00686939
LIHC	chr1	204526648	MDM4	0.00187525	0.00874263
LIHC	chr1	204526657	MDM4	0.000207707	0.00178707
LIHC	chr1	204526660	MDM4	0.00038688	0.0028213
LIHC	chr1	204526688	MDM4	0.000288408	0.00228816
LIHC	chr1	204526704	MDM4	0.000852599	0.0049901
LIHC	chr1	204526710	MDM4	2.86e-06	7.35786e-05
LIHC	chr1	204526713	MDM4	1.23e-07	6.18679e-06
LIHC	chr1	204526727	MDM4	1.78e-08	1.42521e-06
LIHC	chr1	204526739	MDM4	3.6e-05	0.000501741
LIHC	chr1	204526752	MDM4	0.00887918	0.026431
LIHC	chr1	204526764	MDM4	0.0108868	0.030785
LIHC	chr1	204526792	MDM4	0.000684935	0.00425315
LIHC	chr1	204526804	MDM4	0.00468817	0.0166631
LIHC	chr1	204526806	MDM4	0.000145194	0.00137429
LIHC	chr1	204526813	MDM4	0.0144188	0.0379087
LIHC	chr1	205738736	RAB7L1	0.0202746	0.048775
LIHC	chr1	205738753	RAB7L1	0.00374284	0.0141486
LIHC	chr1	206279212	C1orf186	0.0171291	0.0429599
LIHC	chr1	206279276	C1orf186	0.00494387	0.0173907
LIHC	chr1	206279281	C1orf186	0.000334274	0.00255067
LIHC	chr1	206279282	C1orf186	0.014479	0.0379087
LIHC	chr1	206279370	C1orf186	0.00148594	0.007463
LIHC	chr1	207942349	CD46	0.0103282	0.029457
LIHC	chr1	207942385	CD46	0.00259887	0.0110011
LIHC	chr1	207942388	CD46	0.00127606	0.00661428
LIHC	chr1	207942393	CD46	0.00217857	0.00969424
LIHC	chr1	207942401	CD46	0.00403274	0.0149898
LIHC	chr1	207942426	CD46	0.00368672	0.0139957
LIHC	chr1	207942427	CD46	0.00127599	0.00661428
LIHC	chr1	207942432	CD46	0.0171274	0.0429599
LIHC	chr1	207943207	CD46	0.00734893	0.0229547
LIHC	chr1	207943208	CD46	0.00521442	0.017892
LIHC	chr1	207943228	CD46	0.00106548	0.00582801
LIHC	chr1	207943325	CD46	0.000353593	0.00262253
LIHC	chr1	207943385	CD46	0.000135852	0.00130653
LIHC	chr1	207943387	CD46	0.0122322	0.0334325
LIHC	chr1	20978366	DDOST	0.0201497	0.0487526
LIHC	chr1	20978487	DDOST	0.00830623	0.0253315
LIHC	chr1	20978496	DDOST	0.00063666	0.00400713
LIHC	chr1	21100753	HP1BP3	0.00521459	0.017892
LIHC	chr1	21100779	HP1BP3	0.00106535	0.00582801
LIHC	chr1	21100780	HP1BP3	0.017129	0.0429599
LIHC	chr1	21101368	HP1BP3	0.00438695	0.0158106
LIHC	chr1	21101369	HP1BP3	0.00259865	0.0110011
LIHC	chr1	21101377	HP1BP3	0.00309696	0.0124087
LIHC	chr1	212114838	INTS7	0.0132139	0.0355979
LIHC	chr1	212114902	INTS7	0.0119454	0.0331598
LIHC	chr1	212114963	INTS7	0.0192539	0.0472268
LIHC	chr1	212989565	TATDN3	0.00565598	0.0190611
LIHC	chr1	214522656	PTPN14	2.39e-08	1.7804e-06
LIHC	chr1	214522658	PTPN14	4.35e-09	5.14568e-07
LIHC	chr1	214522701	PTPN14	1.56e-05	0.000268635
LIHC	chr1	214524177	PTPN14	0.00309717	0.0124087
LIHC	chr1	214524178	PTPN14	0.0033597	0.0132148
LIHC	chr1	214524318	PTPN14	0.000199734	0.00173256
LIHC	chr1	214524434	PTPN14	0.000286121	0.0022847
LIHC	chr1	214524446	PTPN14	0.000292095	0.00228816
LIHC	chr1	214524485	PTPN14	0.000425321	0.00299323
LIHC	chr1	214524566	PTPN14	0.00127613	0.00661428
LIHC	chr1	214524576	PTPN14	0.00113459	0.00611454
LIHC	chr1	220231275	BPNT1	0.00917984	0.027127
LIHC	chr1	220231330	BPNT1	0.00967672	0.0282241
LIHC	chr1	220231355	BPNT1	0.00129062	0.00666545
LIHC	chr1	220231371	BPNT1	0.0171004	0.0429599
LIHC	chr1	220231455	BPNT1	0.00193165	0.0089457
LIHC	chr1	220231939	BPNT1	0.0053415	0.0182151
LIHC	chr1	220232050	BPNT1	0.00316306	0.0126073
LIHC	chr1	225779385	ENAH	0.0011236	0.00606641
LIHC	chr1	225974568	SRP9	0.000703003	0.00433098
LIHC	chr1	225974600	SRP9	0.000706418	0.00434718
LIHC	chr1	225974677	SRP9	0.0136071	0.0364402
LIHC	chr1	225974718	SRP9	0.0202549	0.0487526
LIHC	chr1	225974735	SRP9	0.00127602	0.00661428
LIHC	chr1	225974746	SRP9	0.00051113	0.00341664
LIHC	chr1	225974748	SRP9	0.000738455	0.00447372
LIHC	chr1	225975178	SRP9	0.00368752	0.0139957
LIHC	chr1	225975185	SRP9	0.00871514	0.0260498
LIHC	chr1	225975186	SRP9	0.000512238	0.00341664
LIHC	chr1	225975913	SRP9	7.76e-09	7.7682e-07
LIHC	chr1	225975921	SRP9	8.28e-06	0.000165319
LIHC	chr1	225975976	SRP9	2.01e-05	0.000321436
LIHC	chr1	225975990	SRP9	7.67e-10	1.24518e-07
LIHC	chr1	225976010	SRP9	4.08e-08	2.71308e-06
LIHC	chr1	225976033	SRP9	9.53e-08	5.13258e-06
LIHC	chr1	225976051	SRP9	1.61e-07	7.61032e-06
LIHC	chr1	225976060	SRP9	7.9e-09	7.7682e-07
LIHC	chr1	225976174	SRP9	1.19e-08	1.08576e-06
LIHC	chr1	225976193	SRP9	2.89e-08	2.0741e-06
LIHC	chr1	225976198	SRP9	7.89e-08	4.3662e-06
LIHC	chr1	225976283	SRP9	0.000164786	0.00150289
LIHC	chr1	225976301	SRP9	2.76e-05	0.000406319
LIHC	chr1	225976320	SRP9	6.24e-08	3.74718e-06
LIHC	chr1	227969771	SNAP47	0.00182446	0.00857612
LIHC	chr1	227969803	SNAP47	0.00368746	0.0139957
LIHC	chr1	228368594	IBA57	0.0114254	0.0320183
LIHC	chr1	231470864	EXOC8	0.000164798	0.00150289
LIHC	chr1	231470929	EXOC8	0.00468394	0.0166556
LIHC	chr1	231701339	TSNAX	0.0200633	0.0487526
LIHC	chr1	231701350	TSNAX	0.00941315	0.0276457
LIHC	chr1	237066297	MTR	0.00644937	0.0209926
LIHC	chr1	237066315	MTR	0.0155087	0.0400125
LIHC	chr1	237066359	MTR	0.00222195	0.0098317
LIHC	chr1	23708605	TCEA3	0.000404772	0.0029246
LIHC	chr1	23708607	TCEA3	0.00103314	0.00576913
LIHC	chr1	23708668	TCEA3	0.0141607	0.0376277
LIHC	chr1	23708672	TCEA3	0.00892381	0.0265235
LIHC	chr1	23708806	TCEA3	0.00991044	0.0287376
LIHC	chr1	2436080	PLCH2	0.000888722	0.00511397
LIHC	chr1	245240238	EFCAB2	0.000761921	0.00457956
LIHC	chr1	245285890	EFCAB2	0.0132694	0.0356944
LIHC	chr1	245285900	EFCAB2	0.00136772	0.00699309
LIHC	chr1	245285985	EFCAB2	0.00119373	0.00636751
LIHC	chr1	245286027	EFCAB2	0.00177785	0.00850793
LIHC	chr1	245286033	EFCAB2	0.0131027	0.035359
LIHC	chr1	245286039	EFCAB2	0.000593079	0.00384179
LIHC	chr1	247263063	ZNF669	1.48e-05	0.000257116
LIHC	chr1	247263118	ZNF669	0.00438673	0.0158106
LIHC	chr1	247263121	ZNF669	0.00398739	0.0148739
LIHC	chr1	247263415	ZNF669	0.0122312	0.0334325
LIHC	chr1	247263660	ZNF669	0.011069	0.0311663
LIHC	chr1	247263717	ZNF669	0.00074014	0.00447372
LIHC	chr1	24933603	NCMAP	0.0171286	0.0429599
LIHC	chr1	26611864	UBXN11	0.0140935	0.0374787
LIHC	chr1	27205044	GPN2	2.45e-05	0.000372565
LIHC	chr1	27205045	GPN2	4.77e-05	0.00062381
LIHC	chr1	27205164	GPN2	0.000361175	0.00266635
LIHC	chr1	27205171	GPN2	0.008498	0.025822
LIHC	chr1	27205178	GPN2	0.0146999	0.0383843
LIHC	chr1	27205197	GPN2	0.000399722	0.00289455
LIHC	chr1	27205214	GPN2	0.000139933	0.00133498
LIHC	chr1	27205224	GPN2	0.000347263	0.00261942
LIHC	chr1	27205241	GPN2	0.000784342	0.00466955
LIHC	chr1	27205580	GPN2	0.0171288	0.0429599
LIHC	chr1	27205590	GPN2	0.000512149	0.00341664
LIHC	chr1	27205602	GPN2	8.63e-05	0.000945324
LIHC	chr1	27270951	NUDC	0.00524616	0.0179785
LIHC	chr1	28661682	MED18	0.00643586	0.0209544
LIHC	chr1	28661698	MED18	0.0010941	0.00594807
LIHC	chr1	28661739	MED18	0.0191354	0.0469755
LIHC	chr1	28661750	MED18	0.00196819	0.00908276
LIHC	chr1	28661767	MED18	0.000807255	0.00477817
LIHC	chr1	28662062	MED18	0.00245656	0.0106831
LIHC	chr1	28662175	MED18	0.000225371	0.00190698
LIHC	chr1	28662222	MED18	0.019276	0.0472614
LIHC	chr1	28825486	PHACTR4	0.0191275	0.0469708
LIHC	chr1	28825670	PHACTR4	0.0121462	0.0334325
LIHC	chr1	28825673	PHACTR4	0.0117206	0.0326667
LIHC	chr1	28825781	PHACTR4	0.00705568	0.02253
LIHC	chr1	28825787	PHACTR4	0.0193747	0.0474541
LIHC	chr1	28825923	PHACTR4	0.0142173	0.0377397
LIHC	chr1	28826150	PHACTR4	0.0175382	0.0437759
LIHC	chr1	28835853	SNHG3	0.00367593	0.0139957
LIHC	chr1	28835937	SNHG3	3.3e-05	0.000472806
LIHC	chr1	29519554	MECR	0.00368785	0.0139957
LIHC	chr1	31343015	SDC3	0.00274455	0.011502
LIHC	chr1	31343383	SDC3	0.011798	0.0328399
LIHC	chr1	31904197	SERINC2	0.00871533	0.0260498
LIHC	chr1	31904209	SERINC2	0.00521419	0.017892
LIHC	chr1	31904221	SERINC2	0.00871471	0.0260498
LIHC	chr1	31904226	SERINC2	0.00217859	0.00969424
LIHC	chr1	32696890	EIF3I	1.62e-05	0.00027654
LIHC	chr1	32696949	EIF3I	1.09e-06	3.42115e-05
LIHC	chr1	32696969	EIF3I	0.000700978	0.00431964
LIHC	chr1	32696981	EIF3I	0.00312357	0.0124877
LIHC	chr1	32697017	EIF3I	0.00796901	0.0244928
LIHC	chr1	32832680	BSDC1	0.0103274	0.029457
LIHC	chr1	33071096	ZBTB8A	2.35e-05	0.000359681
LIHC	chr1	33071124	ZBTB8A	0.0137631	0.0367412
LIHC	chr1	33071144	ZBTB8A	0.0202549	0.0487526
LIHC	chr1	33071191	ZBTB8A	0.00173563	0.0083364
LIHC	chr1	33086758	ZBTB8OS	0.000413285	0.00297151
LIHC	chr1	33147915	RBBP4	0.00391038	0.0146437
LIHC	chr1	33147928	RBBP4	0.00427958	0.0157211
LIHC	chr1	33148096	RBBP4	4.11e-06	9.56967e-05
LIHC	chr1	33148118	RBBP4	0.000122118	0.00121715
LIHC	chr1	33148119	RBBP4	0.0012761	0.00661428
LIHC	chr1	33148186	RBBP4	0.0131882	0.0355457
LIHC	chr1	33148196	RBBP4	0.000577622	0.00376342
LIHC	chr1	33148210	RBBP4	0.00438637	0.0158106
LIHC	chr1	33148214	RBBP4	0.00127525	0.00661428
LIHC	chr1	33148216	RBBP4	0.00298634	0.0122662
LIHC	chr1	33148251	RBBP4	0.00486186	0.0171484
LIHC	chr1	33148282	RBBP4	0.00569704	0.0191748
LIHC	chr1	33148287	RBBP4	0.000616085	0.00390166
LIHC	chr1	33148706	RBBP4	0.00289139	0.0119458
LIHC	chr1	33148789	RBBP4	0.000132941	0.00129987
LIHC	chr1	33148848	RBBP4	0.0142865	0.037885
LIHC	chr1	33149256	RBBP4	8.31e-06	0.000165777
LIHC	chr1	33149260	RBBP4	2.69e-05	0.000402816
LIHC	chr1	33149266	RBBP4	0.00042868	0.00300958
LIHC	chr1	33149333	RBBP4	0.000671279	0.00417722
LIHC	chr1	33149334	RBBP4	0.000332526	0.00254145
LIHC	chr1	33149338	RBBP4	0.00943479	0.0276857
LIHC	chr1	33149363	RBBP4	0.00734925	0.0229547
LIHC	chr1	33149400	RBBP4	0.00521431	0.017892
LIHC	chr1	33149408	RBBP4	0.0144778	0.0379087
LIHC	chr1	33149414	RBBP4	0.000512177	0.00341664
LIHC	chr1	33149443	RBBP4	0.000152784	0.00142546
LIHC	chr1	33150642	RBBP4	9.31e-05	0.000995265
LIHC	chr1	35581755	ZMYM1	0.0019519	0.00902883
LIHC	chr1	35581761	ZMYM1	0.00634794	0.0207226
LIHC	chr1	35581799	ZMYM1	8.02e-05	0.000893473
LIHC	chr1	35581813	ZMYM1	0.000310241	0.00240075
LIHC	chr1	35583572	ZMYM1(dist=2117)andSFPQ(dist=65629)	2.24e-05	0.000347539
LIHC	chr1	36065468	PSMB2	0.00711964	0.022688
LIHC	chr1	36065562	PSMB2	0.00018043	0.00161904
LIHC	chr1	36066948	PSMB2	0.00720225	0.0228924
LIHC	chr1	36067711	PSMB2	0.00137864	0.00703972
LIHC	chr1	36067714	PSMB2	0.00143812	0.00728029
LIHC	chr1	36067817	PSMB2	0.00855284	0.0259551
LIHC	chr1	36067886	PSMB2	0.00282608	0.011762
LIHC	chr1	36067887	PSMB2	0.000137056	0.00131525
LIHC	chr1	36068210	PSMB2	0.0179844	0.0446951
LIHC	chr1	36068231	PSMB2	0.000999031	0.00561672
LIHC	chr1	36068237	PSMB2	0.0184177	0.0455509
LIHC	chr1	36068243	PSMB2	0.0181467	0.0450041
LIHC	chr1	36068275	PSMB2	0.000378508	0.00277175
LIHC	chr1	36068276	PSMB2	0.00253652	0.0109559
LIHC	chr1	36068281	PSMB2	0.000655159	0.00409627
LIHC	chr1	36068295	PSMB2	0.00317884	0.0126572
LIHC	chr1	36068370	PSMB2	0.000906281	0.00518693
LIHC	chr1	3697057	LRRC47	0.00104433	0.00581901
LIHC	chr1	3729867	CEP104	0.0169719	0.0429543
LIHC	chr1	3729877	CEP104	0.000638488	0.00401044
LIHC	chr1	3730142	CEP104	0.00819737	0.0250638
LIHC	chr1	3730375	CEP104	0.0020829	0.00949668
LIHC	chr1	3730400	CEP104	0.00356907	0.0138663
LIHC	chr1	38327206	INPP5B	0.00734403	0.0229547
LIHC	chr1	45242539	RPS8	0.00871467	0.0260498
LIHC	chr1	45242978	RPS8	0.00890109	0.0264694
LIHC	chr1	45975109	MMACHC	0.00107411	0.00586513
LIHC	chr1	45975202	MMACHC	0.0100047	0.0289217
LIHC	chr1	45975250	MMACHC	0.00820188	0.0250678
LIHC	chr1	45975266	MMACHC	0.00102847	0.00575061
LIHC	chr1	45975564	MMACHC	0.0153722	0.0397474
LIHC	chr1	45975573	MMACHC	0.0167203	0.0424683
LIHC	chr1	45975628	MMACHC	0.000362436	0.00267285
LIHC	chr1	45975642	MMACHC	0.0180665	0.0448518
LIHC	chr1	45975669	MMACHC	0.00325209	0.0128798
LIHC	chr1	45976113	MMACHC	0.0132691	0.0356944
LIHC	chr1	46160600	IPP	0.00231602	0.0101658
LIHC	chr1	46160625	IPP	0.000210636	0.00180567
LIHC	chr1	46160626	IPP	0.000769905	0.00460925
LIHC	chr1	46160654	IPP	0.00994577	0.028801
LIHC	chr1	46160655	IPP	0.0165164	0.0420592
LIHC	chr1	46160666	IPP	0.0030332	0.0124087
LIHC	chr1	46160669	IPP	0.000974731	0.00551571
LIHC	chr1	46160681	IPP	0.0145355	0.0380311
LIHC	chr1	46160683	IPP	0.0195345	0.047766
LIHC	chr1	46160688	IPP	0.00952387	0.027882
LIHC	chr1	46160700	IPP	0.000102357	0.00106709
LIHC	chr1	46160929	IPP	0.0108542	0.030715
LIHC	chr1	46160934	IPP	0.0191934	0.0470981
LIHC	chr1	46160961	IPP	0.000337665	0.00257154
LIHC	chr1	46160975	IPP	1.63e-05	0.000277844
LIHC	chr1	46160981	IPP	0.000956508	0.00543476
LIHC	chr1	46160991	IPP	0.00215913	0.00969424
LIHC	chr1	46161019	IPP	0.00958642	0.0280259
LIHC	chr1	46161036	IPP	9.33e-05	0.000996951
LIHC	chr1	46161055	IPP	0.00499514	0.0175292
LIHC	chr1	46161056	IPP	0.000361809	0.0026699
LIHC	chr1	46161080	IPP	0.000195341	0.00173113
LIHC	chr1	46161099	IPP	5.03e-05	0.000648982
LIHC	chr1	46161105	IPP	0.0190552	0.0468184
LIHC	chr1	46161453	IPP	0.0129123	0.0349209
LIHC	chr1	46161613	IPP	0.0052139	0.017892
LIHC	chr1	46162236	IPP	0.00368779	0.0139957
LIHC	chr1	46162287	IPP	0.009696	0.028248
LIHC	chr1	46162324	IPP	0.0103252	0.029457
LIHC	chr1	46162352	IPP	0.0122321	0.0334325
LIHC	chr1	46162411	IPP	0.00700286	0.0223977
LIHC	chr1	46162413	IPP	0.00840151	0.0255684
LIHC	chr1	46162953	IPP	0.000230248	0.00193863
LIHC	chr1	46162990	IPP	0.00290622	0.0120001
LIHC	chr1	46163015	IPP	0.000259653	0.00210936
LIHC	chr1	46163025	IPP	0.00274758	0.0115126
LIHC	chr1	46163034	IPP	0.000534365	0.00354038
LIHC	chr1	46163047	IPP	0.000124253	0.00123102
LIHC	chr1	46163055	IPP	0.00454737	0.0162707
LIHC	chr1	46163060	IPP	0.000614903	0.00390166
LIHC	chr1	46163061	IPP	0.000101791	0.00106307
LIHC	chr1	46163071	IPP	0.00427647	0.0157122
LIHC	chr1	46163092	IPP	9.37e-05	0.00100032
LIHC	chr1	46163094	IPP	0.0017419	0.008358
LIHC	chr1	46163100	IPP	0.00105194	0.00582801
LIHC	chr1	46163102	IPP	0.0168144	0.0426566
LIHC	chr1	46163103	IPP	0.000184802	0.00165408
LIHC	chr1	46163117	IPP	0.00135157	0.00692128
LIHC	chr1	46163118	IPP	0.00111659	0.00603778
LIHC	chr1	46163142	IPP	0.000135926	0.00130653
LIHC	chr1	46163143	IPP	7.09e-06	0.000146274
LIHC	chr1	46163151	IPP	0.00269768	0.0113399
LIHC	chr1	46163166	IPP	0.00529302	0.018097
LIHC	chr1	46163356	IPP	0.00178951	0.00854635
LIHC	chr1	46163387	IPP	0.0173837	0.0434499
LIHC	chr1	46163463	IPP	0.000597054	0.00386084
LIHC	chr1	46163466	IPP	7.98e-05	0.000889859
LIHC	chr1	46163472	IPP	0.000229439	0.00193501
LIHC	chr1	46163517	IPP	0.000676566	0.00420776
LIHC	chr1	46163546	IPP	1.13e-05	0.000211113
LIHC	chr1	46163547	IPP	0.00123166	0.0065294
LIHC	chr1	46163548	IPP	0.000473955	0.00325749
LIHC	chr1	46163583	IPP	0.0114721	0.0321185
LIHC	chr1	46163591	IPP	0.000154939	0.0014399
LIHC	chr1	46163628	IPP	0.00149111	0.00748417
LIHC	chr1	46163712	IPP	0.0122382	0.0334441
LIHC	chr1	46163718	IPP	0.00208738	0.00951528
LIHC	chr1	46163749	IPP	0.00117846	0.00630331
LIHC	chr1	46163758	IPP	0.000413605	0.002972
LIHC	chr1	46163783	IPP	0.000949752	0.00540289
LIHC	chr1	46163840	IPP	0.0156202	0.0402562
LIHC	chr1	46163956	IPP	1.19e-05	0.000219317
LIHC	chr1	46163963	IPP	1.18e-05	0.000218546
LIHC	chr1	46164458	IPP	0.000793767	0.00471137
LIHC	chr1	46164459	IPP	0.00107787	0.0058824
LIHC	chr1	46164474	IPP	0.000792248	0.00470472
LIHC	chr1	46164483	IPP	2.17e-05	0.000341456
LIHC	chr1	46164493	IPP	0.00026669	0.00215661
LIHC	chr1	46164555	IPP	0.00361497	0.0139957
LIHC	chr1	46164636	IPP	0.00717141	0.0228283
LIHC	chr1	46165408	IPP	0.0105165	0.0298946
LIHC	chr1	46165456	IPP	0.0122299	0.0334325
LIHC	chr1	52816503	CC2D1B	0.000790488	0.00469901
LIHC	chr1	52816506	CC2D1B	0.00284396	0.0118093
LIHC	chr1	52816510	CC2D1B	8.06e-05	0.000896656
LIHC	chr1	52816515	CC2D1B	1.62e-05	0.00027654
LIHC	chr1	52816523	CC2D1B	0.000704105	0.0043355
LIHC	chr1	52816546	CC2D1B	0.00929903	0.0274104
LIHC	chr1	52816555	CC2D1B	3.75e-05	0.000519876
LIHC	chr1	52816556	CC2D1B	7.15e-05	0.000826675
LIHC	chr1	52816582	CC2D1B	0.000195505	0.00173145
LIHC	chr1	52816591	CC2D1B	0.000541078	0.00356978
LIHC	chr1	52816612	CC2D1B	0.00707986	0.0225949
LIHC	chr1	52816622	CC2D1B	0.00819334	0.025058
LIHC	chr1	52816674	CC2D1B	0.000322255	0.00248107
LIHC	chr1	52816691	CC2D1B	0.000344219	0.00261216
LIHC	chr1	52816692	CC2D1B	0.000106271	0.00110071
LIHC	chr1	52816700	CC2D1B	0.000164498	0.00150289
LIHC	chr1	52816708	CC2D1B	0.000603014	0.0038869
LIHC	chr1	52817314	CC2D1B	0.014478	0.0379087
LIHC	chr1	52817456	CC2D1B	0.00607328	0.0202024
LIHC	chr1	52817473	CC2D1B	0.00116216	0.00623032
LIHC	chr1	52817480	CC2D1B	0.00366903	0.0139957
LIHC	chr1	52817487	CC2D1B	0.00820652	0.0250755
LIHC	chr1	52838676	ORC1	0.000135857	0.00130653
LIHC	chr1	52838682	ORC1	0.00259908	0.0110011
LIHC	chr1	52838696	ORC1	0.000888696	0.00511397
LIHC	chr1	53289570	ZYG11B	0.00121043	0.00643775
LIHC	chr1	53289688	ZYG11B	0.00277783	0.0116146
LIHC	chr1	53289940	ZYG11B	0.000535993	0.00354545
LIHC	chr1	53290293	ZYG11B	0.00505832	0.0177034
LIHC	chr1	53291395	ZYG11B	0.000585361	0.00380452
LIHC	chr1	53291407	ZYG11B	0.00119143	0.00635825
LIHC	chr1	53291408	ZYG11B	0.000154009	0.00143352
LIHC	chr1	53291434	ZYG11B	0.000302524	0.00235532
LIHC	chr1	53291435	ZYG11B	0.00128548	0.00664731
LIHC	chr1	53372547	ECHDC2	0.00263455	0.0111242
LIHC	chr1	53378018	ECHDC2	0.0104981	0.0298604
LIHC	chr1	53378034	ECHDC2	0.0155323	0.0400647
LIHC	chr1	53378159	ECHDC2	0.0112793	0.0316729
LIHC	chr1	53378535	ECHDC2	0.00337982	0.0132823
LIHC	chr1	53378637	ECHDC2	0.00465185	0.0165719
LIHC	chr1	53382679	ECHDC2	0.00273434	0.0114674
LIHC	chr1	53382727	ECHDC2	0.0208765	0.0499844
LIHC	chr1	53382728	ECHDC2	0.00700575	0.0224039
LIHC	chr1	53382729	ECHDC2	0.00635469	0.0207389
LIHC	chr1	53382732	ECHDC2	0.0039889	0.0148739
LIHC	chr1	53382771	ECHDC2	0.0101441	0.0292637
LIHC	chr1	53382832	ECHDC2	0.00675584	0.0217704
LIHC	chr1	53382837	ECHDC2	0.00261514	0.0110521
LIHC	chr1	53383939	ECHDC2	0.0122322	0.0334325
LIHC	chr1	53383943	ECHDC2	0.00217873	0.00969424
LIHC	chr1	53384001	ECHDC2	0.0020173	0.00925025
LIHC	chr1	53384758	ECHDC2	0.00600797	0.0200294
LIHC	chr1	53385607	ECHDC2	0.00763793	0.0236762
LIHC	chr1	54387684	HSPB11	0.020255	0.0487526
LIHC	chr1	54387700	HSPB11	0.00217863	0.00969424
LIHC	chr1	54387823	HSPB11	0.0108809	0.030782
LIHC	chr1	54387824	HSPB11	0.0043869	0.0158106
LIHC	chr1	54387885	HSPB11	0.00074035	0.00447372
LIHC	chr1	54565159	TCEANC2	0.0122318	0.0334325
LIHC	chr1	54565643	TCEANC2	0.0061926	0.0203054
LIHC	chr1	57178405	PRKAA2	0.00734905	0.0229547
LIHC	chr1	57376894	C8A	0.0188873	0.0464973
LIHC	chr1	62627211	INADL	0.00435617	0.0158106
LIHC	chr1	62627220	INADL	0.01244	0.0338971
LIHC	chr1	62627273	INADL	0.00260925	0.0110352
LIHC	chr1	6279872	RNF207	5.13e-06	0.000112966
LIHC	chr1	6279873	RNF207	6.76e-05	0.000794857
LIHC	chr1	6279912	RNF207	0.00798773	0.0245439
LIHC	chr1	6279920	RNF207	0.0130438	0.0352162
LIHC	chr1	6279950	RNF207	1.15e-05	0.000214509
LIHC	chr1	6279957	RNF207	0.00241775	0.0105353
LIHC	chr1	6279969	RNF207	1.57e-05	0.000269568
LIHC	chr1	6280037	RNF207	7.04e-05	0.000817974
LIHC	chr1	6280041	RNF207	8.62e-05	0.000944669
LIHC	chr1	6280086	RNF207	0.00144153	0.0072944
LIHC	chr1	6280092	RNF207	0.00147237	0.00741383
LIHC	chr1	6283273	ICMT	0.00232207	0.0101905
LIHC	chr1	6582149	NOL9	0.00632854	0.020665
LIHC	chr1	6582161	NOL9	0.0013136	0.00676043
LIHC	chr1	6582176	NOL9	6.73e-05	0.000792121
LIHC	chr1	6582353	NOL9	6.75e-05	0.000794078
LIHC	chr1	6582689	NOL9	0.00858941	0.0260426
LIHC	chr1	6582868	NOL9	0.0172461	0.0431932
LIHC	chr1	6583066	NOL9	0.0101276	0.0292196
LIHC	chr1	6583138	NOL9	0.00676922	0.0218105
LIHC	chr1	6583162	NOL9	0.020616	0.0494626
LIHC	chr1	6583383	NOL9	0.0159625	0.0409857
LIHC	chr1	6583395	NOL9	0.0196044	0.0479027
LIHC	chr1	6583474	NOL9	0.00936791	0.0275721
LIHC	chr1	6585332	NOL9	0.0193903	0.0474823
LIHC	chr1	65893507	LEPROT	6.36e-05	0.000758432
LIHC	chr1	65893533	LEPROT	0.00202561	0.00928405
LIHC	chr1	67450795	MIER1	0.0174134	0.0435058
LIHC	chr1	67874731	SERBP1	0.0153586	0.0397294
LIHC	chr1	67874849	SERBP1	7.64e-05	0.000860094
LIHC	chr1	67874859	SERBP1	0.000153171	0.00142741
LIHC	chr1	67874864	SERBP1	0.00598245	0.0199682
LIHC	chr1	70582119	LRRC7	0.0197448	0.04821
LIHC	chr1	70582150	LRRC7	0.00203748	0.00932394
LIHC	chr1	70905364	CTH	0.00619341	0.0203054
LIHC	chr1	70905411	CTH	0.0002245	0.00190098
LIHC	chr1	70905444	CTH	0.00185519	0.0086873
LIHC	chr1	70905479	CTH	0.000283323	0.00226543
LIHC	chr1	70905480	CTH	0.00448323	0.0160906
LIHC	chr1	70905483	CTH	0.0100036	0.0289217
LIHC	chr1	70905515	CTH	0.0110766	0.0311781
LIHC	chr1	70905519	CTH	0.00937352	0.0275721
LIHC	chr1	70905967	CTH	0.00473913	0.0167985
LIHC	chr1	70910387	CTH(dist=4853)andPTGER3(dist=407649)	4.88e-05	0.000636075
LIHC	chr1	70910646	CTH(dist=5112)andPTGER3(dist=407390)	2.53e-05	0.000382506
LIHC	chr1	70910654	CTH(dist=5120)andPTGER3(dist=407382)	1.76e-05	0.000294459
LIHC	chr1	70910693	CTH(dist=5159)andPTGER3(dist=407343)	1.67e-08	1.39743e-06
LIHC	chr1	70910722	CTH(dist=5188)andPTGER3(dist=407314)	0.000150642	0.00141223
LIHC	chr1	70910732	CTH(dist=5198)andPTGER3(dist=407304)	0.000307375	0.00238327
LIHC	chr1	70910793	CTH(dist=5259)andPTGER3(dist=407243)	3.98e-05	0.000544705
LIHC	chr1	70910836	CTH(dist=5302)andPTGER3(dist=407200)	0.000150929	0.00141323
LIHC	chr1	70910854	CTH(dist=5320)andPTGER3(dist=407182)	1.41e-09	2.02387e-07
LIHC	chr1	70910855	CTH(dist=5321)andPTGER3(dist=407181)	1.81e-08	1.43944e-06
LIHC	chr1	78490455	DNAJB4(dist=7460)andGIPC2(dist=21134)	0.0077266	0.0238818
LIHC	chr1	89648193	GBP4	0.0136166	0.0364515
LIHC	chr1	89648303	GBP4	0.00950227	0.0278352
LIHC	chr1	89649327	GBP4	0.0167527	0.0425322
LIHC	chr1	89649487	GBP4	0.00665554	0.0215149
LIHC	chr1	89649494	GBP4	0.000972619	0.00550636
LIHC	chr1	9326957	H6PD	4.07e-05	0.000553482
LIHC	chr1	9326960	H6PD	0.00497524	0.0174802
LIHC	chr1	9326997	H6PD	0.00132974	0.00682855
LIHC	chr1	9328207	H6PD	0.00272985	0.0114547
LIHC	chr1	9331254	H6PD	0.00722781	0.0229547
LIHC	chr1	93791335	LOC100131564	0.0171287	0.0429599
LIHC	chr1	93791372	LOC100131564	0.0122315	0.0334325
LIHC	chr1	93798917	LOC100131564	0.0202545	0.0487526
LIHC	chr1	93803536	LOC100131564	0.008715	0.0260498
LIHC	chr1	9643027	SLC25A33	0.00438695	0.0158106
LIHC	chr1	9644912	SLC25A33(dist=2081)andTMEM201(dist=4020)	0.00551679	0.0186695
LIHC	chr1	9988825	LZIC	0.00175662	0.00841763
LIHC	chr1	9988826	LZIC	0.00990577	0.0287276
LIHC	chr10	101473506	COX15	0.0167831	0.0426048
LIHC	chr10	101556205	ABCC2	0.00368783	0.0139957
LIHC	chr10	101556206	ABCC2	0.00734949	0.0229547
LIHC	chr10	101992205	CWF19L1	0.00751751	0.0233708
LIHC	chr10	101992308	CWF19L1	0.00712501	0.022699
LIHC	chr10	101992442	CWF19L1	0.00220002	0.00977143
LIHC	chr10	101992443	CWF19L1	0.00223464	0.00987486
LIHC	chr10	101992645	CWF19L1	0.00371188	0.0140625
LIHC	chr10	101992732	CWF19L1	0.000149308	0.00140252
LIHC	chr10	101992738	CWF19L1	0.00173983	0.00835115
LIHC	chr10	101992822	CWF19L1	0.015086	0.0391537
LIHC	chr10	104191034	CUEDC2	0.0200226	0.0487028
LIHC	chr10	104235918	TMEM180	0.000152679	0.00142546
LIHC	chr10	104235925	TMEM180	0.00146584	0.00739044
LIHC	chr10	104235928	TMEM180	0.000348188	0.00261942
LIHC	chr10	104235954	TMEM180	0.000425298	0.00299323
LIHC	chr10	104236005	TMEM180	0.000425291	0.00299323
LIHC	chr10	104236014	TMEM180	7.54e-05	0.000852817
LIHC	chr10	104236039	TMEM180	6.59e-06	0.000136918
LIHC	chr10	104236045	TMEM180	0.00382968	0.0143988
LIHC	chr10	104236099	TMEM180	0.000606209	0.00390108
LIHC	chr10	104236224	TMEM180	0.00583393	0.0195544
LIHC	chr10	104497867	SFXN2	0.00414778	0.0153273
LIHC	chr10	104497868	SFXN2	4.91e-06	0.000110393
LIHC	chr10	104660583	C10orf32-AS3MT	0.00184355	0.00864656
LIHC	chr10	104660585	C10orf32-AS3MT	6.19e-05	0.000743432
LIHC	chr10	104660586	C10orf32-AS3MT	0.00446477	0.0160442
LIHC	chr10	104660681	C10orf32-AS3MT	0.0137336	0.0366916
LIHC	chr10	104660723	C10orf32-AS3MT	0.0160721	0.0411593
LIHC	chr10	104660733	C10orf32-AS3MT	0.00924909	0.0272973
LIHC	chr10	104660750	C10orf32-AS3MT	0.000971743	0.00550537
LIHC	chr10	104660756	C10orf32-AS3MT	8.62e-05	0.000944669
LIHC	chr10	104660765	C10orf32-AS3MT	4.13e-06	9.60674e-05
LIHC	chr10	104660769	C10orf32-AS3MT	0.0119536	0.0331746
LIHC	chr10	104660773	C10orf32-AS3MT	0.00204604	0.00935766
LIHC	chr10	104660776	C10orf32-AS3MT	4e-06	9.49194e-05
LIHC	chr10	104661000	C10orf32-AS3MT	0.0123426	0.0336787
LIHC	chr10	104661031	C10orf32-AS3MT	0.0020044	0.00920654
LIHC	chr10	104661080	C10orf32-AS3MT	4.9e-05	0.000638329
LIHC	chr10	104661090	C10orf32-AS3MT	5.79e-06	0.000125043
LIHC	chr10	104661092	C10orf32-AS3MT	5.97e-05	0.000735009
LIHC	chr10	104661132	C10orf32-AS3MT	0.00378565	0.0142654
LIHC	chr10	104661135	C10orf32-AS3MT	2.42e-07	1.05299e-05
LIHC	chr10	104661212	C10orf32-AS3MT	0.00112534	0.00607443
LIHC	chr10	104661224	C10orf32-AS3MT	3.41e-09	4.30518e-07
LIHC	chr10	104661226	C10orf32-AS3MT	0.0154752	0.0399393
LIHC	chr10	104661227	C10orf32-AS3MT	1.62e-06	4.70219e-05
LIHC	chr10	104661233	C10orf32-AS3MT	0.00391856	0.014672
LIHC	chr10	104848173	NT5C2	0.00903935	0.026779
LIHC	chr10	104848309	NT5C2	0.0160776	0.0411645
LIHC	chr10	11805724	ECHDC3	0.00147659	0.00742713
LIHC	chr10	121332025	TIAL1	0.0135658	0.0363629
LIHC	chr10	121332786	TIAL1	0.00100543	0.00564597
LIHC	chr10	121332793	TIAL1	0.00124215	0.00657083
LIHC	chr10	12162964	DHTKD1	0.0207584	0.0497508
LIHC	chr10	12163140	DHTKD1	0.0149927	0.0389891
LIHC	chr10	12163503	DHTKD1	0.00994024	0.0287885
LIHC	chr10	12163680	DHTKD1	0.0114507	0.0320665
LIHC	chr10	12163691	DHTKD1	0.0126947	0.0344675
LIHC	chr10	12164361	DHTKD1	0.00395097	0.0147722
LIHC	chr10	12164496	DHTKD1	0.0107465	0.0304776
LIHC	chr10	12165869	DHTKD1	3.99e-10	7.63615e-08
LIHC	chr10	12166187	DHTKD1	7.05e-12	3.60776e-09
LIHC	chr10	12166292	DHTKD1(dist=1065)andSEC61A2(dist=5348)	4.42e-14	8.0036e-11
LIHC	chr10	12166302	DHTKD1(dist=1075)andSEC61A2(dist=5338)	2.22e-09	2.93589e-07
LIHC	chr10	12166889	DHTKD1(dist=1662)andSEC61A2(dist=4751)	9.46e-08	5.10753e-06
LIHC	chr10	124813591	ACADSB	5.25e-06	0.000114431
LIHC	chr10	124813672	ACADSB	7.48e-08	4.22252e-06
LIHC	chr10	124813682	ACADSB	9.95e-07	3.18671e-05
LIHC	chr10	124813740	ACADSB	9.15e-07	2.97501e-05
LIHC	chr10	124813745	ACADSB	6.06e-07	2.19465e-05
LIHC	chr10	126451032	METTL10	0.00210771	0.00958755
LIHC	chr10	12867907	CAMK1D	0.012232	0.0334325
LIHC	chr10	12868051	CAMK1D	0.00176163	0.00843545
LIHC	chr10	12868057	CAMK1D	0.0166547	0.0423217
LIHC	chr10	131978456	GLRX3	0.0199344	0.0485484
LIHC	chr10	131981650	GLRX3(dist=3004)andMIR378C(dist=779201)	0.00734929	0.0229547
LIHC	chr10	131981655	GLRX3(dist=3009)andMIR378C(dist=779196)	0.00368771	0.0139957
LIHC	chr10	13333765	PHYH	0.00438698	0.0158106
LIHC	chr10	135177236	ECHS1	0.00948555	0.0278035
LIHC	chr10	135177280	ECHS1	0.0183029	0.0453377
LIHC	chr10	14948965	DCLRE1C	0.00368785	0.0139957
LIHC	chr10	14949006	DCLRE1C	0.000191623	0.00170283
LIHC	chr10	14949134	DCLRE1C	0.000352664	0.00261942
LIHC	chr10	14949135	DCLRE1C	0.0001997	0.00173256
LIHC	chr10	14949138	DCLRE1C	0.00217872	0.00969424
LIHC	chr10	14949926	DCLRE1C	0.00485318	0.0171203
LIHC	chr10	14949976	DCLRE1C	0.00113554	0.00611682
LIHC	chr10	14949977	DCLRE1C	0.00274826	0.0115134
LIHC	chr10	14949989	DCLRE1C	0.000303848	0.00236137
LIHC	chr10	14949998	DCLRE1C	0.00530901	0.0181358
LIHC	chr10	14950021	DCLRE1C	0.00070047	0.00431764
LIHC	chr10	14950117	DCLRE1C	0.00151	0.00752464
LIHC	chr10	14950122	DCLRE1C	1.37e-05	0.000244132
LIHC	chr10	14950273	DCLRE1C	0.0144789	0.0379087
LIHC	chr10	14950279	DCLRE1C	0.000850106	0.00497922
LIHC	chr10	15144305	RPP38	0.0142949	0.0378986
LIHC	chr10	15148266	NMT2	0.00167731	0.00811091
LIHC	chr10	15148852	NMT2	0.000616195	0.00390166
LIHC	chr10	15148927	NMT2	0.00223111	0.00986482
LIHC	chr10	15149026	NMT2	0.00430923	0.0157931
LIHC	chr10	15149549	NMT2	0.00619304	0.0203054
LIHC	chr10	16479432	PTER	0.00858915	0.0260426
LIHC	chr10	16479438	PTER	0.00126483	0.00661428
LIHC	chr10	27400082	YME1L1	0.0048181	0.0170246
LIHC	chr10	28810323	WAC-AS1	0.00925629	0.0273083
LIHC	chr10	28811111	WAC-AS1	0.00486933	0.017167
LIHC	chr10	28812603	WAC-AS1	4.28e-06	9.89697e-05
LIHC	chr10	28812618	WAC-AS1	0.00736042	0.0229794
LIHC	chr10	28814165	WAC-AS1	0.017555	0.0437991
LIHC	chr10	28814242	WAC-AS1	0.0043869	0.0158106
LIHC	chr10	28814523	WAC-AS1	0.000483791	0.00330723
LIHC	chr10	28814524	WAC-AS1	0.000218981	0.00186431
LIHC	chr10	28814545	WAC-AS1	0.000338205	0.00257316
LIHC	chr10	28814588	WAC-AS1	0.000552746	0.00362947
LIHC	chr10	28814615	WAC-AS1	4.53e-06	0.00010333
LIHC	chr10	28814618	WAC-AS1	2.19e-06	5.93241e-05
LIHC	chr10	28814655	WAC-AS1	2.34e-05	0.000358851
LIHC	chr10	28814658	WAC-AS1	3.65e-05	0.000508108
LIHC	chr10	28814663	WAC-AS1	0.000573758	0.00374238
LIHC	chr10	28814664	WAC-AS1	0.000462059	0.00319266
LIHC	chr10	28814671	WAC-AS1	0.0122324	0.0334325
LIHC	chr10	28814692	WAC-AS1	0.00119545	0.00637246
LIHC	chr10	38355740	ZNF33A(dist=6745)andZNF37A(dist=27524)	0.00309736	0.0124087
LIHC	chr10	38355762	ZNF33A(dist=6767)andZNF37A(dist=27502)	0.00152677	0.00752464
LIHC	chr10	38355862	ZNF33A(dist=6867)andZNF37A(dist=27402)	0.00152678	0.00752464
LIHC	chr10	38355863	ZNF33A(dist=6868)andZNF37A(dist=27401)	0.00521442	0.017892
LIHC	chr10	38739877	LOC399744	0.0119142	0.0330926
LIHC	chr10	38739966	LOC399744	0.00119001	0.00635354
LIHC	chr10	51733314	TIMM23(dist=109928)andAGAP6(dist=14764)	0.0198816	0.0484489
LIHC	chr10	5903393	ANKRD16	0.0074788	0.0232687
LIHC	chr10	70042844	PBLD	0.00020288	0.00175387
LIHC	chr10	70042878	PBLD	0.000196149	0.00173256
LIHC	chr10	70042887	PBLD	0.00363084	0.0139957
LIHC	chr10	70042891	PBLD	0.00960718	0.0280657
LIHC	chr10	70043588	PBLD	0.000818679	0.0048264
LIHC	chr10	70043600	PBLD	0.0203094	0.0488389
LIHC	chr10	70043608	PBLD	0.000357933	0.00264961
LIHC	chr10	70043619	PBLD	1.63e-07	7.68942e-06
LIHC	chr10	70043632	PBLD	0.0126052	0.0342759
LIHC	chr10	70043636	PBLD	1.87e-07	8.59762e-06
LIHC	chr10	70043641	PBLD	0.0179384	0.0445997
LIHC	chr10	70043642	PBLD	0.00850547	0.025838
LIHC	chr10	70043707	PBLD	8e-05	0.000891667
LIHC	chr10	70043717	PBLD	0.000975449	0.00551708
LIHC	chr10	70043776	PBLD	0.012541	0.0341289
LIHC	chr10	70043793	PBLD	0.013111	0.0353733
LIHC	chr10	70043799	PBLD	0.0173	0.0433006
LIHC	chr10	70045519	PBLD	0.00185218	0.00867842
LIHC	chr10	70046076	PBLD	0.0176829	0.0440669
LIHC	chr10	70241329	SLC25A16	0.0156589	0.0403426
LIHC	chr10	70241726	SLC25A16	0.00661543	0.021414
LIHC	chr10	70241813	SLC25A16	0.00487851	0.0171891
LIHC	chr10	70277697	SLC25A16	0.00521402	0.017892
LIHC	chr10	70551681	CCAR1	0.00145324	0.00734578
LIHC	chr10	71923709	SAR1A	0.000197684	0.00173256
LIHC	chr10	73951600	ASCC1	0.0206945	0.0496279
LIHC	chr10	73951601	ASCC1	0.00291934	0.0120449
LIHC	chr10	73979926	ANAPC16	0.00814235	0.0249344
LIHC	chr10	73979944	ANAPC16	0.000338088	0.0025731
LIHC	chr10	73979976	ANAPC16	0.0161024	0.0412191
LIHC	chr10	73979993	ANAPC16	0.000312879	0.00241798
LIHC	chr10	73980019	ANAPC16	0.000132895	0.00129987
LIHC	chr10	73993821	ANAPC16	0.0208462	0.0499307
LIHC	chr10	73993829	ANAPC16	0.0116479	0.0325141
LIHC	chr10	73993839	ANAPC16	8.45e-06	0.000167859
LIHC	chr10	73993844	ANAPC16	4.59e-05	0.000604637
LIHC	chr10	73993845	ANAPC16	0.000457865	0.00317467
LIHC	chr10	73994699	ANAPC16	0.00648305	0.0210826
LIHC	chr10	73994732	ANAPC16	0.00452512	0.0162158
LIHC	chr10	73994789	ANAPC16	0.00269641	0.0113386
LIHC	chr10	73994829	ANAPC16	0.0111379	0.0313283
LIHC	chr10	73994915	ANAPC16	0.00207335	0.00946049
LIHC	chr10	73994920	ANAPC16	0.000884393	0.00511397
LIHC	chr10	73994951	ANAPC16	2.86e-07	1.2087e-05
LIHC	chr10	73994952	ANAPC16	5.91e-06	0.000126474
LIHC	chr10	73994994	ANAPC16	0.00239356	0.0104535
LIHC	chr10	73995011	ANAPC16	0.00134639	0.0069035
LIHC	chr10	73995020	ANAPC16	0.0020602	0.00940961
LIHC	chr10	73995021	ANAPC16	0.000488987	0.00333645
LIHC	chr10	73995089	ANAPC16	0.00197538	0.00909633
LIHC	chr10	73995090	ANAPC16	0.0146083	0.0381921
LIHC	chr10	73995099	ANAPC16	9.65e-06	0.00018663
LIHC	chr10	73995138	ANAPC16	3.69e-06	8.91813e-05
LIHC	chr10	75008797	MRPS16	0.0171576	0.0430173
LIHC	chr10	75008845	MRPS16	0.0172079	0.0431114
LIHC	chr10	75008948	MRPS16	0.00285969	0.0118453
LIHC	chr10	75008957	MRPS16	0.000565297	0.00369847
LIHC	chr10	75008965	MRPS16	0.000636987	0.00400713
LIHC	chr10	75009592	MRPS16	0.00525189	0.0179877
LIHC	chr10	75009720	MRPS16	0.00220484	0.00978542
LIHC	chr10	75009721	MRPS16	0.00309242	0.0124087
LIHC	chr10	75536698	FUT11	0.00607384	0.0202024
LIHC	chr10	75536699	FUT11	0.0200467	0.0487449
LIHC	chr10	75537382	FUT11(dist=1406)andCHCHD1(dist=4426)	0.00806865	0.0247409
LIHC	chr10	75537649	FUT11(dist=1673)andCHCHD1(dist=4159)	0.00169043	0.00816332
LIHC	chr10	75537666	FUT11(dist=1690)andCHCHD1(dist=4142)	0.00343443	0.013443
LIHC	chr10	75538101	FUT11(dist=2125)andCHCHD1(dist=3707)	0.00131952	0.00678051
LIHC	chr10	75538103	FUT11(dist=2127)andCHCHD1(dist=3705)	0.00858608	0.0260392
LIHC	chr10	75538134	FUT11(dist=2158)andCHCHD1(dist=3674)	0.00108654	0.00592065
LIHC	chr10	75538663	FUT11(dist=2687)andCHCHD1(dist=3145)	0.0162773	0.0415719
LIHC	chr10	75538687	FUT11(dist=2711)andCHCHD1(dist=3121)	0.0146567	0.0382843
LIHC	chr10	75538696	FUT11(dist=2720)andCHCHD1(dist=3112)	0.00349509	0.0136216
LIHC	chr10	75538713	FUT11(dist=2737)andCHCHD1(dist=3095)	0.000976731	0.00551787
LIHC	chr10	75538718	FUT11(dist=2742)andCHCHD1(dist=3090)	0.00226883	0.00999683
LIHC	chr10	75538719	FUT11(dist=2743)andCHCHD1(dist=3089)	0.00199484	0.00917161
LIHC	chr10	75538751	FUT11(dist=2775)andCHCHD1(dist=3057)	0.0145433	0.0380472
LIHC	chr10	75539005	FUT11(dist=3029)andCHCHD1(dist=2803)	0.0118455	0.0329447
LIHC	chr10	75539093	FUT11(dist=3117)andCHCHD1(dist=2715)	0.0023499	0.0102857
LIHC	chr10	75539160	FUT11(dist=3184)andCHCHD1(dist=2648)	0.000294634	0.00230345
LIHC	chr10	75539161	FUT11(dist=3185)andCHCHD1(dist=2647)	0.00027033	0.00218155
LIHC	chr10	75539166	FUT11(dist=3190)andCHCHD1(dist=2642)	0.00152673	0.00752464
LIHC	chr10	75539198	FUT11(dist=3222)andCHCHD1(dist=2610)	0.0037797	0.0142541
LIHC	chr10	75539201	FUT11(dist=3225)andCHCHD1(dist=2607)	0.000561789	0.00367961
LIHC	chr10	75539214	FUT11(dist=3238)andCHCHD1(dist=2594)	0.0132227	0.0356135
LIHC	chr10	75539276	FUT11(dist=3300)andCHCHD1(dist=2532)	0.0134428	0.0360906
LIHC	chr10	75539309	FUT11(dist=3333)andCHCHD1(dist=2499)	0.00292174	0.0120472
LIHC	chr10	82192286	FAM213A	0.000723608	0.00443587
LIHC	chr10	82192303	FAM213A	0.0160201	0.0410843
LIHC	chr10	82193809	FAM213A(dist=1056)andTSPAN14(dist=20229)	0.0157132	0.0404515
LIHC	chr10	82195918	FAM213A(dist=3165)andTSPAN14(dist=18120)	0.0100748	0.0290889
LIHC	chr10	82195969	FAM213A(dist=3216)andTSPAN14(dist=18069)	0.0147222	0.0384177
LIHC	chr10	82195988	FAM213A(dist=3235)andTSPAN14(dist=18050)	0.00534478	0.0182237
LIHC	chr10	82196010	FAM213A(dist=3257)andTSPAN14(dist=18028)	0.00896775	0.026634
LIHC	chr10	82196082	FAM213A(dist=3329)andTSPAN14(dist=17956)	0.0122813	0.0335346
LIHC	chr10	82196111	FAM213A(dist=3358)andTSPAN14(dist=17927)	0.0178333	0.0443899
LIHC	chr10	82196134	FAM213A(dist=3381)andTSPAN14(dist=17904)	0.00197611	0.00909793
LIHC	chr10	82196135	FAM213A(dist=3382)andTSPAN14(dist=17903)	0.00250834	0.0108541
LIHC	chr10	82196147	FAM213A(dist=3394)andTSPAN14(dist=17891)	0.0164123	0.0418531
LIHC	chr10	82282091	TSPAN14	0.00339647	0.0133277
LIHC	chr10	82282102	TSPAN14	0.0138362	0.0369148
LIHC	chr10	82282146	TSPAN14	0.00319578	0.0127087
LIHC	chr10	88686256	BMPR1A(dist=1311)andMMRN2(dist=9042)	0.00197268	0.00909103
LIHC	chr10	96372419	HELLS(dist=10563)andCYP2C18(dist=70832)	0.00259896	0.0110011
LIHC	chr10	96372427	HELLS(dist=10571)andCYP2C18(dist=70824)	2.76e-05	0.000406319
LIHC	chr10	96372428	HELLS(dist=10572)andCYP2C18(dist=70823)	7.55e-05	0.000852817
LIHC	chr10	96372433	HELLS(dist=10577)andCYP2C18(dist=70818)	0.00521419	0.017892
LIHC	chr10	96372444	HELLS(dist=10588)andCYP2C18(dist=70807)	3.38e-05	0.000477869
LIHC	chr10	96372483	HELLS(dist=10627)andCYP2C18(dist=70768)	0.00152677	0.00752464
LIHC	chr10	96372484	HELLS(dist=10628)andCYP2C18(dist=70767)	0.0030973	0.0124087
LIHC	chr10	96372497	HELLS(dist=10641)andCYP2C18(dist=70754)	0.017129	0.0429599
LIHC	chr10	96372521	HELLS(dist=10665)andCYP2C18(dist=70730)	0.00309739	0.0124087
LIHC	chr10	96372530	HELLS(dist=10674)andCYP2C18(dist=70721)	0.0103283	0.029457
LIHC	chr10	96372562	HELLS(dist=10706)andCYP2C18(dist=70689)	0.000199743	0.00173256
LIHC	chr10	96372563	HELLS(dist=10707)andCYP2C18(dist=70688)	0.000199732	0.00173256
LIHC	chr10	96372568	HELLS(dist=10712)andCYP2C18(dist=70683)	0.000241716	0.00198857
LIHC	chr10	96372572	HELLS(dist=10716)andCYP2C18(dist=70679)	6.19e-05	0.000743432
LIHC	chr10	96372608	HELLS(dist=10752)andCYP2C18(dist=70643)	0.00218416	0.00970741
LIHC	chr10	96372611	HELLS(dist=10755)andCYP2C18(dist=70640)	0.00309718	0.0124087
LIHC	chr10	96372630	HELLS(dist=10774)andCYP2C18(dist=70621)	9.19e-05	0.00098557
LIHC	chr10	96372631	HELLS(dist=10775)andCYP2C18(dist=70620)	0.0025987	0.0110011
LIHC	chr10	97926270	ZNF518A(dist=2753)andBLNK(dist=25185)	0.00259859	0.0110011
LIHC	chr10	97926337	ZNF518A(dist=2820)andBLNK(dist=25118)	0.00368767	0.0139957
LIHC	chr10	97926381	ZNF518A(dist=2864)andBLNK(dist=25074)	0.00438707	0.0158106
LIHC	chr10	97926385	ZNF518A(dist=2868)andBLNK(dist=25070)	0.0144783	0.0379087
LIHC	chr10	97926390	ZNF518A(dist=2873)andBLNK(dist=25065)	0.00259899	0.0110011
LIHC	chr10	97926480	ZNF518A(dist=2963)andBLNK(dist=24975)	0.00438705	0.0158106
LIHC	chr10	98627771	LCOR	0.0163447	0.0417189
LIHC	chr10	99371805	HOGA1	0.00377167	0.0142284
LIHC	chr10	99371857	HOGA1	0.000197608	0.00173256
LIHC	chr10	99371896	HOGA1	8.83e-06	0.000174965
LIHC	chr10	99371996	HOGA1	9.8e-08	5.21928e-06
LIHC	chr10	99372031	HOGA1	0.0185612	0.0458382
LIHC	chr10	99373323	HOGA1andMORN4	6.98e-05	0.000813815
LIHC	chr10	99373324	HOGA1andMORN4	1.11e-06	3.47465e-05
LIHC	chr10	99373370	HOGA1andMORN4	2.09e-11	7.93526e-09
LIHC	chr10	99373378	HOGA1andMORN4	1.97e-12	1.25335e-09
LIHC	chr11	108236485	ATM	0.0152009	0.0394119
LIHC	chr11	108236521	ATM	0.0150567	0.0391108
LIHC	chr11	108236523	ATM	0.0185956	0.0459072
LIHC	chr11	108236609	ATM	0.00643222	0.0209454
LIHC	chr11	108236645	ATM	0.0131409	0.0354418
LIHC	chr11	111599164	PPP2R1B	0.00719912	0.0228855
LIHC	chr11	111599195	PPP2R1B	0.00187557	0.00874263
LIHC	chr11	111599499	PPP2R1B	0.0120363	0.0333413
LIHC	chr11	111653930	ALG9	0.000669373	0.0041701
LIHC	chr11	111653996	ALG9	0.0140018	0.0372684
LIHC	chr11	111654138	ALG9	0.006708	0.0216476
LIHC	chr11	118619352	DDX6	0.0125507	0.0341514
LIHC	chr11	118880578	CCDC84	0.00152671	0.00752464
LIHC	chr11	118880627	CCDC84	0.00813207	0.0249094
LIHC	chr11	118880646	CCDC84	0.0144783	0.0379087
LIHC	chr11	118880677	CCDC84	0.0066167	0.021414
LIHC	chr11	118880796	CCDC84	0.00150258	0.00752464
LIHC	chr11	118880805	CCDC84	0.000318898	0.00245724
LIHC	chr11	118880809	CCDC84	5.41e-05	0.000679933
LIHC	chr11	118880824	CCDC84	0.0122324	0.0334325
LIHC	chr11	118880839	CCDC84	0.0037431	0.0141486
LIHC	chr11	118880843	CCDC84	0.00368773	0.0139957
LIHC	chr11	118880846	CCDC84	0.00734869	0.0229547
LIHC	chr11	119532228	PVRL1	0.000221513	0.00187999
LIHC	chr11	125526125	CHEK1	7.86e-06	0.000158547
LIHC	chr11	125526139	CHEK1	4.8e-08	3.07043e-06
LIHC	chr11	125526166	CHEK1	6.34e-06	0.000132308
LIHC	chr11	125526167	CHEK1	0.000199736	0.00173256
LIHC	chr11	125526174	CHEK1	1.48e-05	0.000257116
LIHC	chr11	125526195	CHEK1	0.000111818	0.00113356
LIHC	chr11	125545856	CHEK1	0.000888633	0.00511397
LIHC	chr11	125545903	CHEK1	0.000199726	0.00173256
LIHC	chr11	125545920	CHEK1	0.00438698	0.0158106
LIHC	chr11	125545928	CHEK1	0.00106551	0.00582801
LIHC	chr11	125545929	CHEK1	0.000135858	0.00130653
LIHC	chr11	126164729	TIRAP	0.0111931	0.0314498
LIHC	chr11	126164873	TIRAP	0.00220584	0.00978619
LIHC	chr11	126165030	TIRAP	0.00675387	0.02177
LIHC	chr11	126165137	TIRAP	0.0117784	0.0328022
LIHC	chr11	126165163	TIRAP	0.00580803	0.0194898
LIHC	chr11	126165241	TIRAP	0.00931649	0.0274515
LIHC	chr11	126166583	TIRAP(dist=1755)andDCPS(dist=7064)	0.000585558	0.00380452
LIHC	chr11	126166658	TIRAP(dist=1830)andDCPS(dist=6989)	0.0147096	0.0384012
LIHC	chr11	126167876	TIRAP(dist=3048)andDCPS(dist=5771)	0.00029206	0.00228816
LIHC	chr11	129729458	TMEM45B	0.00152419	0.00752464
LIHC	chr11	129730266	TMEM45B	0.0166213	0.042276
LIHC	chr11	129730267	TMEM45B	0.000960687	0.00545455
LIHC	chr11	129730289	TMEM45B	0.00628661	0.0205566
LIHC	chr11	129730290	TMEM45B	0.000226423	0.00191382
LIHC	chr11	129730355	TMEM45B	1.77e-05	0.000294666
LIHC	chr11	129730361	TMEM45B	0.000419507	0.00299323
LIHC	chr11	129730365	TMEM45B	0.00178784	0.00854336
LIHC	chr11	129730382	TMEM45B	0.00122229	0.00649029
LIHC	chr11	129730391	TMEM45B	0.00888071	0.0264322
LIHC	chr11	129730401	TMEM45B	0.00836988	0.0254941
LIHC	chr11	16777917	C11orf58	0.00619311	0.0203054
LIHC	chr11	16778076	C11orf58	0.0139125	0.0370727
LIHC	chr11	16778077	C11orf58	0.0113912	0.0319376
LIHC	chr11	16778194	C11orf58	0.00114144	0.00614298
LIHC	chr11	31452571	DNAJC24	0.00157343	0.0076924
LIHC	chr11	31452585	DNAJC24	0.000359317	0.00265734
LIHC	chr11	31452586	DNAJC24	7.39e-05	0.000850247
LIHC	chr11	31452598	DNAJC24	0.00067082	0.00417722
LIHC	chr11	31452667	DNAJC24	0.00124105	0.00656795
LIHC	chr11	31452678	DNAJC24	0.00415208	0.015339
LIHC	chr11	31452694	DNAJC24	0.0075106	0.0233646
LIHC	chr11	31452696	DNAJC24	0.000187132	0.00167055
LIHC	chr11	31452728	DNAJC24	0.00409626	0.0151828
LIHC	chr11	31452747	DNAJC24	0.00200962	0.00922153
LIHC	chr11	31452750	DNAJC24	0.0118869	0.0330466
LIHC	chr11	31452829	DNAJC24	0.00734901	0.0229547
LIHC	chr11	31452835	DNAJC24	0.000558774	0.0036619
LIHC	chr11	31452879	DNAJC24	0.00150584	0.00752464
LIHC	chr11	31452945	DNAJC24	0.0123091	0.0336026
LIHC	chr11	31452950	DNAJC24	0.0036378	0.0139957
LIHC	chr11	31452959	DNAJC24	0.0072105	0.0229155
LIHC	chr11	31452960	DNAJC24	0.00183152	0.00859873
LIHC	chr11	31453095	DNAJC24	0.00144433	0.00730386
LIHC	chr11	31453097	DNAJC24	0.000133445	0.00130398
LIHC	chr11	31453104	DNAJC24	0.000149201	0.00140207
LIHC	chr11	31453109	DNAJC24	0.00936367	0.0275721
LIHC	chr11	31453125	DNAJC24	0.0172816	0.0432638
LIHC	chr11	31453126	DNAJC24	0.000918448	0.00524764
LIHC	chr11	31453130	DNAJC24	0.00507349	0.0177485
LIHC	chr11	31453219	DNAJC24	0.00702962	0.022465
LIHC	chr11	31453223	DNAJC24	0.0159592	0.0409857
LIHC	chr11	31453268	DNAJC24	0.0100015	0.0289217
LIHC	chr11	32875198	PRRG4	0.00659559	0.0213622
LIHC	chr11	32875253	PRRG4	0.00173124	0.00831872
LIHC	chr11	32875318	PRRG4	0.009805	0.0284985
LIHC	chr11	32875846	PRRG4	0.000523842	0.00348045
LIHC	chr11	32875993	PRRG4	3.28e-06	8.15987e-05
LIHC	chr11	32878403	PRRG4	0.000460519	0.00318654
LIHC	chr11	32878477	PRRG4	0.000953929	0.00542311
LIHC	chr11	32878495	PRRG4	0.0103987	0.0296206
LIHC	chr11	32878543	PRRG4	0.000385897	0.00281618
LIHC	chr11	32878575	PRRG4	0.000994643	0.00560141
LIHC	chr11	32878639	PRRG4	0.011684	0.0325954
LIHC	chr11	32878640	PRRG4	0.0136425	0.036502
LIHC	chr11	32878720	PRRG4	0.000110174	0.00113204
LIHC	chr11	32878772	PRRG4	0.0010808	0.0058962
LIHC	chr11	32878791	PRRG4	0.00175238	0.00840141
LIHC	chr11	32878797	PRRG4	0.00229929	0.0101093
LIHC	chr11	32878798	PRRG4	0.000196651	0.00173256
LIHC	chr11	32878815	PRRG4	0.00556852	0.0188202
LIHC	chr11	32878827	PRRG4	0.000237454	0.0019885
LIHC	chr11	32878871	PRRG4	3.08e-06	7.80443e-05
LIHC	chr11	32878877	PRRG4	1.38e-06	4.14352e-05
LIHC	chr11	32878958	PRRG4	2.17e-06	5.885e-05
LIHC	chr11	32878959	PRRG4	1.13e-05	0.000211113
LIHC	chr11	32878971	PRRG4	2.09e-07	9.42502e-06
LIHC	chr11	43887734	HSD17B12(dist=9565)andALKBH3(dist=14623)	0.0030973	0.0124087
LIHC	chr11	46759520	F2	0.0128752	0.034849
LIHC	chr11	46759668	F2	0.0133533	0.035871
LIHC	chr11	46759811	F2	0.00679516	0.0218761
LIHC	chr11	46760153	F2	0.000191516	0.00170253
LIHC	chr11	46760218	F2	0.000338959	0.00257639
LIHC	chr11	5685355	TRIM5	0.00101703	0.00569615
LIHC	chr11	61240697	SDHAF2(dist=26458)andPPP1R32(dist=7888)	0.000390649	0.0028435
LIHC	chr11	61240727	SDHAF2(dist=26488)andPPP1R32(dist=7858)	9.7e-05	0.00102394
LIHC	chr11	61567728	FADS1	0.000697754	0.00430428
LIHC	chr11	61567821	FADS1	0.00147575	0.00742447
LIHC	chr11	61569425	FADS1	0.00595319	0.0198806
LIHC	chr11	61569450	FADS1	0.0189268	0.0465605
LIHC	chr11	61617246	FADS2	9.57e-05	0.00101706
LIHC	chr11	61617247	FADS2	0.000160437	0.0014863
LIHC	chr11	61617270	FADS2	0.00309725	0.0124087
LIHC	chr11	61617301	FADS2	0.00368796	0.0139957
LIHC	chr11	61617320	FADS2	5.17e-06	0.000113211
LIHC	chr11	61617356	FADS2	0.000298436	0.00233008
LIHC	chr11	61617366	FADS2	9.24e-05	0.00099003
LIHC	chr11	61617446	FADS2	0.00217874	0.00969424
LIHC	chr11	61617449	FADS2	0.00127615	0.00661428
LIHC	chr11	62506294	TTC9C	0.000874258	0.00509785
LIHC	chr11	62506299	TTC9C	5.82e-06	0.000125231
LIHC	chr11	62506362	TTC9C	3.37e-07	1.37249e-05
LIHC	chr11	62506379	TTC9C	0.00152679	0.00752464
LIHC	chr11	62506416	TTC9C	4.94e-05	0.000642473
LIHC	chr11	62506424	TTC9C	0.000126571	0.00125044
LIHC	chr11	62506490	TTC9C	3.65e-09	4.52216e-07
LIHC	chr11	62506500	TTC9C	4.74e-09	5.44291e-07
LIHC	chr11	62506543	TTC9C	2.74e-05	0.000406319
LIHC	chr11	62506586	TTC9C	0.00107335	0.00586368
LIHC	chr11	62506638	TTC9C	2.38e-08	1.77858e-06
LIHC	chr11	62506677	TTC9C	0.00010796	0.00111366
LIHC	chr11	62506972	TTC9C	0.00571607	0.0192278
LIHC	chr11	62506990	TTC9C	0.0200285	0.0487106
LIHC	chr11	62507116	TTC9C(dist=1008)andZBTB3(dist=11319)	8e-09	7.81411e-07
LIHC	chr11	62507118	TTC9C(dist=1010)andZBTB3(dist=11317)	3.87e-05	0.000533684
LIHC	chr11	62507126	TTC9C(dist=1018)andZBTB3(dist=11309)	0.000127911	0.00125984
LIHC	chr11	62507188	TTC9C(dist=1080)andZBTB3(dist=11247)	1.05e-08	9.7311e-07
LIHC	chr11	62507195	TTC9C(dist=1087)andZBTB3(dist=11240)	3.87e-10	7.4672e-08
LIHC	chr11	62507212	TTC9C(dist=1104)andZBTB3(dist=11223)	7.46e-06	0.000152836
LIHC	chr11	62507220	TTC9C(dist=1112)andZBTB3(dist=11215)	3.21e-07	1.33034e-05
LIHC	chr11	62507221	TTC9C(dist=1113)andZBTB3(dist=11214)	5.29e-07	1.97661e-05
LIHC	chr11	62507234	TTC9C(dist=1126)andZBTB3(dist=11201)	1.06e-05	0.000200743
LIHC	chr11	62507236	TTC9C(dist=1128)andZBTB3(dist=11199)	0.000139865	0.00133498
LIHC	chr11	62507240	TTC9C(dist=1132)andZBTB3(dist=11195)	0.00245545	0.0106816
LIHC	chr11	62507282	TTC9C(dist=1174)andZBTB3(dist=11153)	4.28e-07	1.65709e-05
LIHC	chr11	62507285	TTC9C(dist=1177)andZBTB3(dist=11150)	8.21e-07	2.74522e-05
LIHC	chr11	62507302	TTC9C(dist=1194)andZBTB3(dist=11133)	0.000271223	0.002188
LIHC	chr11	62507311	TTC9C(dist=1203)andZBTB3(dist=11124)	8.19e-06	0.000163939
LIHC	chr11	62507324	TTC9C(dist=1216)andZBTB3(dist=11111)	0.00203308	0.00931101
LIHC	chr11	62507345	TTC9C(dist=1237)andZBTB3(dist=11090)	1.73e-05	0.000291303
LIHC	chr11	62507363	TTC9C(dist=1255)andZBTB3(dist=11072)	4.76e-05	0.000622848
LIHC	chr11	62518707	ZBTB3	2.76e-05	0.000406319
LIHC	chr11	62518751	ZBTB3	0.0188386	0.0464006
LIHC	chr11	62518778	ZBTB3	0.00635437	0.0207389
LIHC	chr11	62518831	ZBTB3	0.0103275	0.029457
LIHC	chr11	62519056	ZBTB3	0.0202532	0.0487526
LIHC	chr11	62644279	SLC3A2	0.0202548	0.0487526
LIHC	chr11	63724185	NAA40	3.84e-08	2.59007e-06
LIHC	chr11	63724237	NAA40	1.2e-06	3.69255e-05
LIHC	chr11	63724245	NAA40	0.000254845	0.00207508
LIHC	chr11	63724268	NAA40	0.00394878	0.0147664
LIHC	chr11	63724282	NAA40	0.00215331	0.00969424
LIHC	chr11	63724325	NAA40	1.69e-06	4.81047e-05
LIHC	chr11	63724351	NAA40	2.9e-06	7.44449e-05
LIHC	chr11	63724366	NAA40	5.05e-08	3.20423e-06
LIHC	chr11	63724370	NAA40	0.00397208	0.0148328
LIHC	chr11	63724420	NAA40	7.35e-05	0.000846887
LIHC	chr11	65064788	POLA2	9.56e-07	3.08277e-05
LIHC	chr11	65143393	SLC25A45	0.00874125	0.0260963
LIHC	chr11	65180524	FRMD8	0.00068156	0.00423658
LIHC	chr11	65180589	FRMD8	0.00618237	0.0203054
LIHC	chr11	65180640	FRMD8	0.00423448	0.0155945
LIHC	chr11	65273630	MALAT1	0.00209979	0.00956075
LIHC	chr11	65432930	RELA(dist=2487)andKAT5(dist=46543)	0.00179628	0.00857522
LIHC	chr11	65540403	AP5B1	2.1e-06	5.775e-05
LIHC	chr11	65540404	AP5B1	6.07e-06	0.000129077
LIHC	chr11	65540460	AP5B1	0.000463127	0.00319613
LIHC	chr11	65541913	AP5B1	2.68e-05	0.000401574
LIHC	chr11	65541979	AP5B1	0.000223142	0.00189221
LIHC	chr11	65542015	AP5B1	1.43e-05	0.00025253
LIHC	chr11	65542020	AP5B1	6.33e-07	2.26801e-05
LIHC	chr11	65542045	AP5B1	8.66e-06	0.000171741
LIHC	chr11	65542058	AP5B1	0.00254847	0.0110011
LIHC	chr11	65542059	AP5B1	0.000647642	0.00406113
LIHC	chr11	65543392	AP5B1	0.012231	0.0334325
LIHC	chr11	65543458	AP5B1	0.0171286	0.0429599
LIHC	chr11	65543629	AP5B1	0.008715	0.0260498
LIHC	chr11	65543634	AP5B1	0.00438669	0.0158106
LIHC	chr11	65544168	AP5B1	0.00638353	0.0208131
LIHC	chr11	65544342	AP5B1	0.00335369	0.0131995
LIHC	chr11	65544354	AP5B1	0.0036875	0.0139957
LIHC	chr11	65544365	AP5B1	0.00228402	0.0100535
LIHC	chr11	65544381	AP5B1	0.00747309	0.023254
LIHC	chr11	65544382	AP5B1	0.00681702	0.0219345
LIHC	chr11	65544383	AP5B1	0.0154657	0.039923
LIHC	chr11	65544426	AP5B1	0.00521408	0.017892
LIHC	chr11	65544470	AP5B1	0.0144766	0.0379087
LIHC	chr11	65544490	AP5B1	0.000232908	0.0019553
LIHC	chr11	65544503	AP5B1	0.00532718	0.0181787
LIHC	chr11	65544523	AP5B1	0.00455985	0.0163005
LIHC	chr11	65544567	AP5B1	3.41e-06	8.38782e-05
LIHC	chr11	65544575	AP5B1	0.000352602	0.00261942
LIHC	chr11	66120948	B3GNT1(dist=5787)andSLC29A2(dist=9044)	0.00158921	0.00775763
LIHC	chr11	66120962	B3GNT1(dist=5801)andSLC29A2(dist=9030)	0.0114747	0.0321219
LIHC	chr11	68146242	LRP5	0.000759731	0.0045683
LIHC	chr11	68146244	LRP5	0.00172174	0.00828661
LIHC	chr11	68146250	LRP5	0.00426046	0.0156607
LIHC	chr11	68146251	LRP5	0.0116003	0.032412
LIHC	chr11	68146301	LRP5	0.00583307	0.0195543
LIHC	chr11	68146306	LRP5	0.00237493	0.0103818
LIHC	chr11	68523325	CPT1A	0.00891416	0.0265016
LIHC	chr11	68523567	CPT1A	0.00288531	0.0119284
LIHC	chr11	69480760	ORAOV1	0.00519416	0.017892
LIHC	chr11	69480840	ORAOV1	0.000887084	0.00511397
LIHC	chr11	69480922	ORAOV1	0.0074662	0.023238
LIHC	chr11	73116048	FAM168A	0.019935	0.0485484
LIHC	chr11	74166840	KCNE3	8.77e-05	0.000957097
LIHC	chr11	74166846	KCNE3	0.000111835	0.00113356
LIHC	chr11	74166869	KCNE3	5.07e-05	0.000648982
LIHC	chr11	74166870	KCNE3	5.07e-05	0.000648982
LIHC	chr11	74166884	KCNE3	0.00194253	0.00899128
LIHC	chr11	74167265	KCNE3	1.72e-05	0.000290034
LIHC	chr11	74167320	KCNE3	0.00039377	0.00285914
LIHC	chr11	74721068	NEU3(dist=2325)andOR2AT4(dist=78728)	0.000304842	0.00236831
LIHC	chr11	75440437	MOGAT2	5.82e-14	8.62672e-11
LIHC	chr11	75440449	MOGAT2	1.38e-06	4.14352e-05
LIHC	chr11	75440459	MOGAT2	4.51e-09	5.28186e-07
LIHC	chr11	75440582	MOGAT2	3.27e-11	1.132e-08
LIHC	chr11	75440594	MOGAT2	1.78e-10	4.21855e-08
LIHC	chr11	75440919	MOGAT2	6.13e-08	3.7086e-06
LIHC	chr11	75441066	MOGAT2	5.93e-14	8.62672e-11
LIHC	chr11	75441694	MOGAT2	6.21e-10	1.04417e-07
LIHC	chr11	75441700	MOGAT2	3.27e-10	6.65614e-08
LIHC	chr11	75441834	MOGAT2	1.07e-07	5.57252e-06
LIHC	chr11	75441843	MOGAT2	1.19e-10	3.18325e-08
LIHC	chr11	75441850	MOGAT2	4.37e-12	2.44928e-09
LIHC	chr11	75441912	MOGAT2	4.79e-17	3.75855e-13
LIHC	chr11	76734862	ACER3	0.0142757	0.0378649
LIHC	chr11	76734863	ACER3	0.00494376	0.0173907
LIHC	chr11	76734868	ACER3	0.00858261	0.0260344
LIHC	chr11	76734901	ACER3	0.0197845	0.0482718
LIHC	chr11	76734906	ACER3	0.00393137	0.0147109
LIHC	chr11	76736635	ACER3(dist=1785)andB3GNT6(dist=8750)	0.0144777	0.0379087
LIHC	chr11	76736641	ACER3(dist=1791)andB3GNT6(dist=8744)	0.00871524	0.0260498
LIHC	chr11	76736644	ACER3(dist=1794)andB3GNT6(dist=8741)	0.00450027	0.0161439
LIHC	chr11	76736659	ACER3(dist=1809)andB3GNT6(dist=8726)	0.0100336	0.0289948
LIHC	chr11	76736693	ACER3(dist=1843)andB3GNT6(dist=8692)	0.0087151	0.0260498
LIHC	chr11	76736711	ACER3(dist=1861)andB3GNT6(dist=8674)	0.00619281	0.0203054
LIHC	chr11	76736712	ACER3(dist=1862)andB3GNT6(dist=8673)	0.00368789	0.0139957
LIHC	chr11	767860	PDDC1	0.000122731	0.00122057
LIHC	chr11	767927	PDDC1	0.0102741	0.029457
LIHC	chr11	767943	PDDC1	1.31e-05	0.000235041
LIHC	chr11	767947	PDDC1	0.0031156	0.0124624
LIHC	chr11	767962	PDDC1	0.000538406	0.00355615
LIHC	chr11	767988	PDDC1	0.0157861	0.0406285
LIHC	chr11	768015	PDDC1	1.57e-05	0.000269568
LIHC	chr11	768024	PDDC1	0.000888612	0.00511397
LIHC	chr11	768026	PDDC1	0.00217841	0.00969424
LIHC	chr11	768028	PDDC1	0.000352666	0.00261942
LIHC	chr11	768029	PDDC1	0.00734901	0.0229547
LIHC	chr11	768030	PDDC1	2.76e-05	0.000406319
LIHC	chr11	768033	PDDC1	7.55e-05	0.000852817
LIHC	chr11	768044	PDDC1	0.00127599	0.00661428
LIHC	chr11	768054	PDDC1	0.00438686	0.0158106
LIHC	chr11	768078	PDDC1	0.000200638	0.0017396
LIHC	chr11	768097	PDDC1	0.000965543	0.00547816
LIHC	chr11	768123	PDDC1	0.00464998	0.0165719
LIHC	chr11	768124	PDDC1	0.0184703	0.0456664
LIHC	chr11	768227	PDDC1	0.00472798	0.0167691
LIHC	chr11	768277	PDDC1	5.1e-05	0.000651759
LIHC	chr11	768303	PDDC1	0.00169895	0.00819367
LIHC	chr11	768306	PDDC1	4.69e-05	0.000616086
LIHC	chr11	768312	PDDC1	2.22e-05	0.000347235
LIHC	chr11	768321	PDDC1	2.97e-07	1.24846e-05
LIHC	chr11	768325	PDDC1	9.05e-06	0.000178125
LIHC	chr11	768331	PDDC1	0.0182598	0.0452554
LIHC	chr11	768345	PDDC1	7.59e-06	0.000155094
LIHC	chr11	768347	PDDC1	0.0014441	0.00730386
LIHC	chr11	768356	PDDC1	1.9e-05	0.000307607
LIHC	chr11	768357	PDDC1	0.00061611	0.00390166
LIHC	chr11	768369	PDDC1	0.00411085	0.0152297
LIHC	chr11	768383	PDDC1	6.57e-05	0.000780706
LIHC	chr11	768393	PDDC1	0.0016434	0.00798299
LIHC	chr11	768423	PDDC1	0.00867358	0.0260498
LIHC	chr11	768537	PDDC1	0.000688052	0.00426073
LIHC	chr11	768541	PDDC1	0.017619	0.0439401
LIHC	chr11	768544	PDDC1	0.0128393	0.0347798
LIHC	chr11	768553	PDDC1	0.00234936	0.0102853
LIHC	chr11	768570	PDDC1	0.00467982	0.0166434
LIHC	chr11	768571	PDDC1	0.0018246	0.00857612
LIHC	chr11	768591	PDDC1	0.000752283	0.00453373
LIHC	chr11	768606	PDDC1	0.010116	0.0291897
LIHC	chr11	768609	PDDC1	7.43e-05	0.000852817
LIHC	chr11	768617	PDDC1	7.51e-07	2.5584e-05
LIHC	chr11	768619	PDDC1	0.0041672	0.0153828
LIHC	chr11	768694	PDDC1	0.00115864	0.0062157
LIHC	chr11	768710	PDDC1	3.24e-07	1.34041e-05
LIHC	chr11	768722	PDDC1	3.57e-05	0.000498149
LIHC	chr11	768723	PDDC1	2.63e-05	0.00039534
LIHC	chr11	768732	PDDC1	1.16e-05	0.000215861
LIHC	chr11	768745	PDDC1	0.00386892	0.0145115
LIHC	chr11	768750	PDDC1	0.000432086	0.00303051
LIHC	chr11	768775	PDDC1	4.61e-05	0.000606593
LIHC	chr11	768835	PDDC1	0.00148089	0.00744239
LIHC	chr11	768842	PDDC1	0.00665232	0.0215074
LIHC	chr11	768844	PDDC1	0.000145911	0.00137831
LIHC	chr11	768850	PDDC1	0.00403343	0.0149901
LIHC	chr11	768879	PDDC1	0.00632003	0.0206458
LIHC	chr11	768883	PDDC1	3.01e-06	7.68497e-05
LIHC	chr11	768884	PDDC1	8.51e-06	0.000168908
LIHC	chr11	768889	PDDC1	0.00076761	0.00460293
LIHC	chr11	768909	PDDC1	0.00350929	0.0136656
LIHC	chr11	768979	PDDC1	0.000316551	0.00244315
LIHC	chr11	768989	PDDC1	7.15e-07	2.46069e-05
LIHC	chr11	769001	PDDC1	5.94e-07	2.16117e-05
LIHC	chr11	769014	PDDC1	0.00465148	0.0165719
LIHC	chr11	769018	PDDC1	7.92e-08	4.3662e-06
LIHC	chr11	769019	PDDC1	7.98e-07	2.68356e-05
LIHC	chr11	769038	PDDC1	0.000251711	0.00205382
LIHC	chr11	769044	PDDC1	0.00123324	0.00653399
LIHC	chr11	769054	PDDC1	1.43e-08	1.25138e-06
LIHC	chr11	769055	PDDC1	2.05e-09	2.75754e-07
LIHC	chr11	769057	PDDC1	3.29e-09	4.1863e-07
LIHC	chr11	769063	PDDC1	0.00034593	0.00261942
LIHC	chr11	769100	PDDC1	0.000365495	0.00269288
LIHC	chr11	769112	PDDC1	0.00104762	0.00582801
LIHC	chr11	769393	PDDC1	0.0147092	0.0384012
LIHC	chr11	769403	PDDC1	1.05e-05	0.00019917
LIHC	chr11	769417	PDDC1	0.0056777	0.0191151
LIHC	chr11	769536	PDDC1	0.00207191	0.00945576
LIHC	chr11	769540	PDDC1	0.00102494	0.00573364
LIHC	chr11	769560	PDDC1	0.000269701	0.00217796
LIHC	chr11	769576	PDDC1	0.000227194	0.00191896
LIHC	chr11	769581	PDDC1	0.000163015	0.00150289
LIHC	chr11	769582	PDDC1	0.00190642	0.0088585
LIHC	chr11	769590	PDDC1	0.00817373	0.0250175
LIHC	chr11	769647	PDDC1	0.00528592	0.0180806
LIHC	chr11	769648	PDDC1	0.00440106	0.015844
LIHC	chr11	769675	PDDC1	0.0110644	0.0311637
LIHC	chr11	769682	PDDC1	0.00110211	0.00598409
LIHC	chr11	769715	PDDC1	0.00309718	0.0124087
LIHC	chr11	769721	PDDC1	0.000111524	0.00113356
LIHC	chr11	769738	PDDC1	0.000111863	0.00113356
LIHC	chr11	769742	PDDC1	1.48e-05	0.000257116
LIHC	chr11	769748	PDDC1	3.45e-06	8.46851e-05
LIHC	chr11	769766	PDDC1	0.000239502	0.00198857
LIHC	chr11	769778	PDDC1	0.00407924	0.0151293
LIHC	chr11	769779	PDDC1	0.014945	0.0388864
LIHC	chr11	769781	PDDC1	0.00267336	0.0112658
LIHC	chr11	769784	PDDC1	0.00019562	0.00173182
LIHC	chr11	769786	PDDC1	0.0164496	0.04193
LIHC	chr11	769811	PDDC1	0.000512103	0.00341664
LIHC	chr11	769821	PDDC1	0.00042516	0.00299323
LIHC	chr11	769836	PDDC1	0.0052141	0.017892
LIHC	chr11	769845	PDDC1	3.37e-05	0.000477869
LIHC	chr11	769850	PDDC1	0.002209	0.00979344
LIHC	chr11	769853	PDDC1	0.0045282	0.0162219
LIHC	chr11	769883	PDDC1	1.66e-08	1.39559e-06
LIHC	chr11	769888	PDDC1	0.000325466	0.00250048
LIHC	chr11	769889	PDDC1	7.38e-07	2.51776e-05
LIHC	chr11	77780105	NDUFC2	0.00413094	0.0152825
LIHC	chr11	77780117	NDUFC2	0.00170584	0.00822018
LIHC	chr11	77853798	KCTD21-AS1	0.00368769	0.0139957
LIHC	chr11	77853826	KCTD21-AS1	0.00438673	0.0158106
LIHC	chr11	77853845	KCTD21-AS1	0.00309703	0.0124087
LIHC	chr11	781229	NS3BP	0.00312442	0.0124877
LIHC	chr11	781264	NS3BP	0.00734945	0.0229547
LIHC	chr11	781317	NS3BP	0.00282698	0.011762
LIHC	chr11	784266	NS3BP(dist=3511)andCEND1(dist=2844)	0.000645959	0.00405166
LIHC	chr11	82802957	RAB30-AS1(dist=18203)andPCF11(dist=65180)	0.00331616	0.013089
LIHC	chr11	82802994	RAB30-AS1(dist=18240)andPCF11(dist=65143)	0.00106554	0.00582801
LIHC	chr11	82802995	RAB30-AS1(dist=18241)andPCF11(dist=65142)	0.0122321	0.0334325
LIHC	chr11	82868441	PCF11	0.00118423	0.006327
LIHC	chr11	868404	CHID1	0.00438651	0.0158106
LIHC	chr11	868405	CHID1	0.00734933	0.0229547
LIHC	chr11	868413	CHID1	0.00619287	0.0203054
LIHC	chr11	868488	CHID1	1.88e-05	0.000304788
LIHC	chr11	8707843	RPL27A	0.0104535	0.0297408
LIHC	chr11	8707944	RPL27A	0.0141036	0.0374971
LIHC	chr11	8708761	RPL27A	0.012859	0.0348131
LIHC	chr11	8708782	RPL27A	0.00340635	0.0133554
LIHC	chr11	8708785	RPL27A	1.12e-05	0.000209744
LIHC	chr11	8708789	RPL27A	0.000133926	0.00130653
LIHC	chr11	8708795	RPL27A	0.0111373	0.0313283
LIHC	chr11	8708796	RPL27A	0.000650407	0.00407413
LIHC	chr11	8708799	RPL27A	5.3e-05	0.000671485
LIHC	chr11	8708803	RPL27A	0.00166541	0.00806494
LIHC	chr11	8708825	RPL27A	0.000154802	0.00143919
LIHC	chr11	8708831	RPL27A	0.00283456	0.0117869
LIHC	chr11	8708884	RPL27A	0.00215528	0.00969424
LIHC	chr11	8941369	AKIP1	1.08e-05	0.000204202
LIHC	chr11	8941458	AKIP1	0.000860323	0.0050303
LIHC	chr11	9303759	TMEM41B	0.00343441	0.013443
LIHC	chr11	93268748	SMCO4	0.000448968	0.0031213
LIHC	chr11	93467980	SNORA40	4.92e-09	5.59501e-07
LIHC	chr11	93467983	SNORA40	0.00171098	0.00823818
LIHC	chr11	93468068	SNORA40	1.09e-05	0.000205433
LIHC	chr11	93468086	SNORA40	7.16e-08	4.10089e-06
LIHC	chr11	93468098	SNORA40andTAF1D	6.3e-05	0.000752802
LIHC	chr11	93468149	SNORA40andTAF1D	0.015177	0.0393595
LIHC	chr11	93468161	SNORA40andTAF1D	0.00312533	0.0124877
LIHC	chr11	93468180	SNORA40andTAF1D	0.0063086	0.0206117
LIHC	chr11	93468215	SNORA40andTAF1D	1.53e-07	7.30552e-06
LIHC	chr11	93468592	SNORA40;TAF1D	0.0141605	0.0376277
LIHC	chr11	93468644	SNORA40;TAF1D	0.00106529	0.00582801
LIHC	chr11	93468771	SNORA40;TAF1D	0.0014442	0.00730386
LIHC	chr11	93468772	SNORA40;TAF1D	0.00124427	0.00657613
LIHC	chr11	93495007	C11orf54	0.00321954	0.0127783
LIHC	chr11	93495700	C11orf54	0.0164564	0.0419428
LIHC	chr11	93496655	C11orf54	9.68e-14	1.13934e-10
LIHC	chr11	93496656	C11orf54	2.88e-13	3.0816e-10
LIHC	chr11	93496668	C11orf54	7.83e-10	1.26245e-07
LIHC	chr11	93496678	C11orf54	1.58e-05	0.000271087
LIHC	chr11	93496682	C11orf54	0.000150108	0.00140891
LIHC	chr11	93497175	C11orf54	2.98e-05	0.000434629
LIHC	chr11	93497176	C11orf54	1.24e-05	0.00022419
LIHC	chr11	93497177	C11orf54	2.95e-06	7.55637e-05
LIHC	chr11	93497191	C11orf54	1.15e-07	5.85952e-06
LIHC	chr11	93497194	C11orf54	1.63e-06	4.72539e-05
LIHC	chr11	93497215	C11orf54	2.15e-07	9.60361e-06
LIHC	chr11	93497241	C11orf54	2.11e-08	1.6285e-06
LIHC	chr11	93497242	C11orf54	2.77e-11	9.87967e-09
LIHC	chr11	93497254	C11orf54(dist=1007)andMED17(dist=20151)	9.8e-08	5.21928e-06
LIHC	chr11	93497270	C11orf54(dist=1023)andMED17(dist=20135)	0.0047013	0.0166997
LIHC	chr11	93497797	C11orf54(dist=1550)andMED17(dist=19608)	0.000243511	0.00200079
LIHC	chr11	93497823	C11orf54(dist=1576)andMED17(dist=19582)	2.7e-09	3.4922e-07
LIHC	chr11	93497849	C11orf54(dist=1602)andMED17(dist=19556)	1.31e-10	3.38873e-08
LIHC	chr11	93497866	C11orf54(dist=1619)andMED17(dist=19539)	3.68e-06	8.9031e-05
LIHC	chr11	93497876	C11orf54(dist=1629)andMED17(dist=19529)	2.84e-06	7.32241e-05
LIHC	chr11	93497888	C11orf54(dist=1641)andMED17(dist=19517)	4e-08	2.675e-06
LIHC	chr11	93497890	C11orf54(dist=1643)andMED17(dist=19515)	0.0102008	0.0293984
LIHC	chr11	93498470	C11orf54(dist=2223)andMED17(dist=18935)	2.15e-07	9.60361e-06
LIHC	chr11	93498474	C11orf54(dist=2227)andMED17(dist=18931)	1.09e-06	3.42115e-05
LIHC	chr11	93499124	C11orf54(dist=2877)andMED17(dist=18281)	0.00392748	0.0147007
LIHC	chr11	9771741	SWAP70	0.00881986	0.0262943
LIHC	chr11	9771767	SWAP70	0.00969847	0.0282517
LIHC	chr12	101020632	GAS2L3(dist=1947)andANO4(dist=167742)	0.000462102	0.00319266
LIHC	chr12	101020668	GAS2L3(dist=1983)andANO4(dist=167706)	0.000888716	0.00511397
LIHC	chr12	101021192	GAS2L3(dist=2507)andANO4(dist=167182)	0.000888701	0.00511397
LIHC	chr12	101021194	GAS2L3(dist=2509)andANO4(dist=167180)	0.000199733	0.00173256
LIHC	chr12	101021214	GAS2L3(dist=2529)andANO4(dist=167160)	0.000605612	0.00389831
LIHC	chr12	101021238	GAS2L3(dist=2553)andANO4(dist=167136)	5.11e-06	0.000112736
LIHC	chr12	101021253	GAS2L3(dist=2568)andANO4(dist=167121)	0.00264437	0.0111557
LIHC	chr12	101021265	GAS2L3(dist=2580)andANO4(dist=167109)	0.000292186	0.00228816
LIHC	chr12	101021276	GAS2L3(dist=2591)andANO4(dist=167098)	1.36e-05	0.000242901
LIHC	chr12	102316614	DRAM1	0.00618456	0.0203054
LIHC	chr12	107280405	RIC8B	0.000463627	0.00319865
LIHC	chr12	107280430	RIC8B	0.00154756	0.007599
LIHC	chr12	107280496	RIC8B	0.0102545	0.029457
LIHC	chr12	108984227	TMEM119	0.00011184	0.00113356
LIHC	chr12	108984228	TMEM119	0.000292185	0.00228816
LIHC	chr12	108984979	TMEM119	0.00197175	0.00909055
LIHC	chr12	108984981	TMEM119	0.00584425	0.0195764
LIHC	chr12	109180419	SSH1	8.33e-05	0.000920602
LIHC	chr12	109180424	SSH1	0.00178948	0.00854635
LIHC	chr12	110289505	GLTP	0.000190314	0.00169479
LIHC	chr12	110289557	GLTP	0.000391664	0.00284921
LIHC	chr12	112278192	MAPKAPK5-AS1	0.00252012	0.0108951
LIHC	chr12	113828960	PLBD2(dist=1502)andSDS(dist=1291)	0.0112357	0.0315657
LIHC	chr12	113863578	SDSL	0.00284386	0.0118093
LIHC	chr12	114255911	RBM19	0.0122321	0.0334325
LIHC	chr12	114255948	RBM19	0.00619243	0.0203054
LIHC	chr12	117152913	C12orf49	0.000512238	0.00341664
LIHC	chr12	117152915	C12orf49	1.83e-05	0.000298947
LIHC	chr12	117152918	C12orf49	0.000751856	0.00453232
LIHC	chr12	117152985	C12orf49	3.51e-06	8.5711e-05
LIHC	chr12	117467470	FBXW8	0.0202542	0.0487526
LIHC	chr12	117467471	FBXW8	0.0045786	0.0163529
LIHC	chr12	117467580	FBXW8	0.00428022	0.0157211
LIHC	chr12	117467587	FBXW8	0.0140608	0.0374127
LIHC	chr12	117467598	FBXW8	0.000512149	0.00341664
LIHC	chr12	117469246	FBXW8	0.000616005	0.00390166
LIHC	chr12	117469255	FBXW8	2.76e-05	0.000406319
LIHC	chr12	117469263	FBXW8	1.83e-05	0.000298947
LIHC	chr12	117469264	FBXW8	2.76e-05	0.000406319
LIHC	chr12	117469460	FBXW8	0.000111799	0.00113356
LIHC	chr12	117469464	FBXW8	0.000888456	0.00511397
LIHC	chr12	117469469	FBXW8	9.72e-06	0.00018663
LIHC	chr12	117469471	FBXW8	8.56e-07	2.81364e-05
LIHC	chr12	118539736	VSIG10	0.00309725	0.0124087
LIHC	chr12	118575195	PEBP1	0.00659731	0.0213648
LIHC	chr12	118575212	PEBP1	7.55e-05	0.000852817
LIHC	chr12	118575234	PEBP1	0.00546313	0.0185226
LIHC	chr12	118575241	PEBP1	0.000637734	0.0040086
LIHC	chr12	118575249	PEBP1	0.00198557	0.00913432
LIHC	chr12	118575299	PEBP1	0.00321627	0.0127698
LIHC	chr12	118575323	PEBP1	0.000140238	0.00133706
LIHC	chr12	118575548	PEBP1	5.19e-05	0.00066075
LIHC	chr12	118575557	PEBP1	0.000869404	0.00507206
LIHC	chr12	118575632	PEBP1	0.000636308	0.00400713
LIHC	chr12	120531332	CCDC64	6.36e-10	1.0618e-07
LIHC	chr12	120898606	GATC	0.00191777	0.00889893
LIHC	chr12	120898645	GATC	0.0168211	0.0426634
LIHC	chr12	120899076	GATC	0.006027	0.0200786
LIHC	chr12	120899079	GATC	0.00558108	0.0188519
LIHC	chr12	120899118	GATC	0.00251187	0.0108674
LIHC	chr12	120899174	GATC	0.0146566	0.0382843
LIHC	chr12	120899561	GATCandSRSF9	0.00811161	0.0248532
LIHC	chr12	120899730	GATCandSRSF9	0.00584349	0.0195764
LIHC	chr12	120899731	GATCandSRSF9	0.00400312	0.0149151
LIHC	chr12	121407401	HNF1A-AS1	5.43e-05	0.000681718
LIHC	chr12	121407417	HNF1A-AS1	2.19e-05	0.000343684
LIHC	chr12	121407896	HNF1A-AS1	0.000191414	0.00170226
LIHC	chr12	121408739	HNF1A-AS1	0.00368746	0.0139957
LIHC	chr12	121408751	HNF1A-AS1	0.00106537	0.00582801
LIHC	chr12	122214806	TMEM120B	0.0122307	0.0334325
LIHC	chr12	122214833	TMEM120B	0.000888591	0.00511397
LIHC	chr12	122214962	TMEM120B	0.0171275	0.0429599
LIHC	chr12	122214992	TMEM120B	0.00871519	0.0260498
LIHC	chr12	122215001	TMEM120B	0.00259873	0.0110011
LIHC	chr12	122215058	TMEM120B	0.000352659	0.00261942
LIHC	chr12	122215061	TMEM120B	0.00521422	0.017892
LIHC	chr12	122215092	TMEM120B	0.00217865	0.00969424
LIHC	chr12	122215201	TMEM120B	0.0103277	0.029457
LIHC	chr12	122215204	TMEM120B	0.0103282	0.029457
LIHC	chr12	122215282	TMEM120B	6.19e-05	0.000743432
LIHC	chr12	122215295	TMEM120B	0.000292103	0.00228816
LIHC	chr12	122216235	RHOFandTMEM120B	2.11e-05	0.000333352
LIHC	chr12	122216245	RHOFandTMEM120B	0.000451793	0.00313816
LIHC	chr12	122216274	RHOFandTMEM120B	0.000203559	0.00175845
LIHC	chr12	122216275	RHOFandTMEM120B	0.00152685	0.00752464
LIHC	chr12	122216294	RHOFandTMEM120B	0.000869382	0.00507206
LIHC	chr12	122216326	RHOFandTMEM120B	2.06e-05	0.000327209
LIHC	chr12	122219246	TMEM120B	4.11e-06	9.56967e-05
LIHC	chr12	122219302	TMEM120B	7.88e-09	7.7682e-07
LIHC	chr12	122219316	TMEM120B	5.11e-06	0.000112736
LIHC	chr12	122219332	TMEM120B	5.11e-06	0.000112736
LIHC	chr12	122288329	HPD	0.00695464	0.022292
LIHC	chr12	122290322	HPD	0.00309732	0.0124087
LIHC	chr12	123466262	ARL6IP4	0.00101103	0.00567333
LIHC	chr12	124002057	RILPL1	0.004387	0.0158106
LIHC	chr12	124002097	RILPL1	0.020255	0.0487526
LIHC	chr12	124002106	RILPL1	0.00259864	0.0110011
LIHC	chr12	124002107	RILPL1	0.0103282	0.029457
LIHC	chr12	124002165	RILPL1	0.0171289	0.0429599
LIHC	chr12	124002196	RILPL1	0.000350669	0.00261942
LIHC	chr12	124002206	RILPL1	0.000616184	0.00390166
LIHC	chr12	124002969	RILPL1	0.00182473	0.00857612
LIHC	chr12	124002970	RILPL1	0.000241694	0.00198857
LIHC	chr12	124002978	RILPL1	0.000111964	0.0011336
LIHC	chr12	125267800	SCARB1	0.00182464	0.00857612
LIHC	chr12	125511226	BRI3BP	0.000357199	0.002645
LIHC	chr12	125511242	BRI3BP	0.000306549	0.00237843
LIHC	chr12	125511243	BRI3BP	0.000135844	0.00130653
LIHC	chr12	125511296	BRI3BP	0.00521436	0.017892
LIHC	chr12	125511312	BRI3BP	0.0122318	0.0334325
LIHC	chr12	125511352	BRI3BP(dist=1003)andAACS(dist=38573)	0.00102846	0.00575061
LIHC	chr12	125511378	BRI3BP(dist=1029)andAACS(dist=38547)	0.00316122	0.0126024
LIHC	chr12	125511391	BRI3BP(dist=1042)andAACS(dist=38534)	0.00304082	0.0124087
LIHC	chr12	125512128	BRI3BP(dist=1779)andAACS(dist=37797)	0.00810562	0.0248413
LIHC	chr12	125512157	BRI3BP(dist=1808)andAACS(dist=37768)	0.00127604	0.00661428
LIHC	chr12	125512161	BRI3BP(dist=1812)andAACS(dist=37764)	0.0056673	0.0190891
LIHC	chr12	125512168	BRI3BP(dist=1819)andAACS(dist=37757)	0.0122323	0.0334325
LIHC	chr12	125512179	BRI3BP(dist=1830)andAACS(dist=37746)	0.00127619	0.00661428
LIHC	chr12	125512217	BRI3BP(dist=1868)andAACS(dist=37708)	0.0116246	0.0324722
LIHC	chr12	125512218	BRI3BP(dist=1869)andAACS(dist=37707)	0.00428267	0.0157269
LIHC	chr12	125512219	BRI3BP(dist=1870)andAACS(dist=37706)	0.00309713	0.0124087
LIHC	chr12	125512221	BRI3BP(dist=1872)andAACS(dist=37704)	0.00182474	0.00857612
LIHC	chr12	125512534	BRI3BP(dist=2185)andAACS(dist=37391)	0.00114133	0.00614298
LIHC	chr12	125512540	BRI3BP(dist=2191)andAACS(dist=37385)	0.000687858	0.00426073
LIHC	chr12	125512541	BRI3BP(dist=2192)andAACS(dist=37384)	0.00029451	0.00230324
LIHC	chr12	125513788	BRI3BP(dist=3439)andAACS(dist=36137)	0.0020282	0.00929229
LIHC	chr12	125513797	BRI3BP(dist=3448)andAACS(dist=36128)	0.000839577	0.00492736
LIHC	chr12	125513805	BRI3BP(dist=3456)andAACS(dist=36120)	0.00375405	0.0141755
LIHC	chr12	125513826	BRI3BP(dist=3477)andAACS(dist=36099)	0.00754695	0.0234528
LIHC	chr12	125513873	BRI3BP(dist=3524)andAACS(dist=36052)	5.9e-05	0.000729443
LIHC	chr12	125513874	BRI3BP(dist=3525)andAACS(dist=36051)	0.00287506	0.0118993
LIHC	chr12	125513878	BRI3BP(dist=3529)andAACS(dist=36047)	0.00142628	0.0072359
LIHC	chr12	125513957	BRI3BP(dist=3608)andAACS(dist=35968)	0.00298113	0.0122471
LIHC	chr12	125513963	BRI3BP(dist=3614)andAACS(dist=35962)	0.00622262	0.0203785
LIHC	chr12	125513971	BRI3BP(dist=3622)andAACS(dist=35954)	0.000275121	0.00221036
LIHC	chr12	125514010	BRI3BP(dist=3661)andAACS(dist=35915)	6.68e-05	0.000788997
LIHC	chr12	125514024	BRI3BP(dist=3675)andAACS(dist=35901)	0.000901295	0.0051689
LIHC	chr12	12622169	LOH12CR1(dist=2331)andDUSP16(dist=4047)	0.00619301	0.0203054
[truncated: 28,428 more rows]
