# Supplementary material for: Genomic Positional Dissection of RNA Editomes in Tumor and Normal Samples
Source: Front Genet. 2019 Mar 20;10:211. doi: 10.3389/fgene.2019.00211 (PMC6435843; doi:10.3389/fgene.2019.00211)
Supplement: FIGURE S1 — Histogram of shared RNA editing sites across multiple cancers filtered by four different average RNA editing level: A > 0%, B > 10%, C > 25%, D > 50%. Majority of the RNA editing sites occurs only in 1 or 2 cancers. [file Data_Sheet_1.ZIP › SupplementaryTable4.xlsx]

## Sheet: Sheet1
Table S4. Functional anlaysis results from DAVID
Cancer	Category	Term	Count	%	PValue	Genes	List Total	Pop Hits	Pop Total	Fold Enrichment	Bonferroni	Benjamini	FDR
blca	GOTERM_BP_ALL	GO:0010468~regulation of gene expression	167	26.979	0.00146096	170959, 91661, 105375355, 1107, 6871, 331, 84148, 221937, 23309, 10691, 4928, 3675, 10922, 58533, 7746, 5740, 54811, 22806, 126017, 84081, 675, 3094, 4194, 10330, 672, 9546, 79818, 4193, 6884, 54993, 116496, 3297, 100129842, 284309, 10626, 54797, 472, 5935, 390963, 90333, 730087, 283459, 2316, 6892, 5610, 23633, 4641, 81856, 9883, 54737, 92140, 92595, 5562, 23326, 79027, 2177, 112487, 4093, 1265,…	525	4345	16792	1.22933	0.99906	0.0834317	2.73038
blca	GOTERM_BP_ALL	GO:1901796~regulation of signal transduction by p53 class mediator	14	2.26171	0.00182632	4194, 672, 10848, 5928, 1111, 1107, 6884, 4193, 5982, 7314, 472, 5562, 5810, 83695	525	163	16792	2.74716	0.999836	0.101996	3.40208
blca	GOTERM_BP_ALL	GO:0060255~regulation of macromolecule metabolic process	213	34.4103	0.00275746	170959, 91661, 6871, 331, 221937, 7746, 5740, 22806, 84081, 2013, 10330, 3094, 388121, 79818, 6884, 54993, 3297, 284996, 29904, 10626, 54797, 390963, 5753, 2316, 6892, 5610, 4641, 23633, 81856, 9883, 92140, 112487, 4093, 51582, 79830, 64081, 4239, 90649, 100133941, 7620, 317649, 84874, 100293516, 2962, 2821, 2967, 63967, 988, 7594, 84436, 84307, 84962, 79230, 8837, 2673, 94239, 84172, 55333, 1044…	525	5815	16792	1.17158	0.999998	0.136063	5.09412
blca	GOTERM_BP_ALL	GO:0019222~regulation of metabolic process	223	36.0258	0.00410758	170959, 91661, 6871, 331, 221937, 80207, 7746, 5740, 22806, 84081, 2013, 10330, 3094, 388121, 79818, 6884, 54993, 3297, 284996, 29904, 10626, 6223, 54797, 390963, 5753, 2316, 6892, 5610, 4641, 23633, 81856, 9883, 92140, 112487, 4093, 51582, 79830, 64081, 4239, 90649, 100133941, 7620, 317649, 84874, 100293516, 2962, 2821, 2967, 63967, 988, 7594, 140710, 84436, 84307, 84962, 79230, 8837, 2673, 9423…	525	6171	16792	1.15583	1	0.184853	7.49773
blca	GOTERM_BP_ALL	GO:0032007~negative regulation of TOR signaling	5	0.807754	0.0250834	201163, 5562, 472, 126282, 55654	525	36	16792	4.44233	1	0.581553	38.1842
blca	GOTERM_BP_ALL	GO:2000112~regulation of cellular macromolecule biosynthetic process	145	23.4249	0.0257202	170959, 91661, 1107, 6871, 331, 84148, 221937, 23309, 10691, 3675, 58533, 7746, 5740, 54811, 22806, 126017, 675, 3094, 4194, 672, 79818, 4193, 6884, 54993, 116496, 3297, 100129842, 284309, 10626, 54797, 472, 5935, 390963, 90333, 730087, 283459, 2316, 23633, 5610, 81856, 54737, 92140, 92595, 5562, 23326, 79027, 80169, 2177, 112487, 4093, 79830, 7112, 9422, 90649, 1111, 7428, 162967, 129685, 7620, …	525	3991	16792	1.16206	1	0.585606	38.9443
blca	GOTERM_BP_ALL	GO:0010556~regulation of macromolecule biosynthetic process	148	23.9095	0.0302389	170959, 91661, 1107, 6871, 331, 84148, 221937, 23309, 10691, 3675, 58533, 7746, 5740, 54811, 22806, 126017, 675, 3094, 4194, 10330, 672, 79818, 4193, 6884, 54993, 116496, 3297, 100129842, 284309, 6693, 10626, 54797, 472, 5935, 390963, 90333, 730087, 283459, 2316, 23633, 5610, 81856, 54737, 92140, 92595, 5562, 23326, 79027, 80169, 2177, 112487, 4093, 79830, 7112, 9422, 90649, 1111, 7428, 162967, 1…	525	4107	16792	1.1526	1	0.638133	44.0889
blca	GOTERM_BP_ALL	GO:0051171~regulation of nitrogen compound metabolic process	157	25.3635	0.0353542	170959, 91661, 1107, 6871, 331, 84148, 221937, 23309, 10691, 3675, 10922, 58533, 7746, 5740, 54811, 22806, 126017, 84081, 675, 3094, 4194, 672, 79818, 4193, 6884, 54993, 116496, 3297, 100129842, 284309, 10626, 54797, 472, 5935, 390963, 90333, 730087, 283459, 2316, 5610, 23633, 81856, 54737, 92140, 92595, 5562, 23326, 79027, 80169, 2177, 112487, 4093, 79830, 7112, 51582, 10181, 5429, 9422, 90649, …	525	4404	16792	1.14024	1	0.6742	49.4168
blca	GOTERM_BP_ALL	GO:0051252~regulation of RNA metabolic process	136	21.9709	0.0356088	170959, 91661, 1107, 6871, 331, 84148, 221937, 23309, 10691, 3675, 10922, 58533, 7746, 5740, 54811, 22806, 126017, 84081, 675, 3094, 4194, 672, 79818, 4193, 6884, 54993, 3297, 100129842, 284309, 10626, 54797, 390963, 90333, 730087, 2316, 23633, 5610, 81856, 54737, 92140, 92595, 5562, 23326, 79027, 2177, 4093, 79830, 7112, 10181, 9422, 90649, 1111, 7428, 162967, 129685, 7620, 285315, 27300, 84874,…	525	3762	16792	1.15628	1	0.672123	49.669
blca	GOTERM_BP_ALL	GO:2001044~regulation of integrin-mediated signaling pathway	3	0.484653	0.0370487	2013, 2316, 65979	525	10	16792	9.59543	1	0.679869	51.0731
blca	GOTERM_BP_ALL	GO:0080090~regulation of primary metabolic process	201	32.4717	0.0422388	170959, 91661, 6871, 331, 221937, 80207, 7746, 5740, 22806, 84081, 2013, 3094, 10330, 388121, 79818, 6884, 54993, 3297, 284996, 29904, 10626, 54797, 390963, 5753, 2316, 5610, 23633, 81856, 92140, 112487, 4093, 79830, 51582, 64081, 90649, 100133941, 7620, 317649, 84874, 100293516, 2962, 2821, 2967, 63967, 988, 7594, 140710, 84436, 84307, 84962, 79230, 8837, 94239, 55333, 10443, 26048, 201163, 5603…	525	5798	16792	1.10882	1	0.716952	55.8322
blca	GOTERM_BP_ALL	GO:0010508~positive regulation of autophagy	7	1.13086	0.0429289	92140, 10241, 22863, 201163, 5562, 201292, 8678	525	82	16792	2.73041	1	0.720678	56.4308
blca	GOTERM_BP_ALL	GO:0031323~regulation of cellular metabolic process	202	32.6333	0.0462595	170959, 91661, 6871, 331, 221937, 7746, 5740, 22806, 84081, 2013, 3094, 10330, 388121, 79818, 6884, 54993, 3297, 284996, 29904, 10626, 54797, 390963, 5753, 2316, 5610, 23633, 81856, 92140, 112487, 4093, 79830, 51582, 64081, 90649, 100133941, 7620, 317649, 84874, 100293516, 2962, 2821, 2967, 63967, 988, 7594, 140710, 84436, 84307, 84962, 79230, 8837, 94239, 55333, 10443, 26048, 201163, 5603, 5928,…	525	5844	16792	1.10557	1	0.728855	59.2139
blca	GOTERM_BP_ALL	GO:0019219~regulation of nucleobase-containing compound metabolic process	146	23.5864	0.0462763	170959, 91661, 1107, 6871, 331, 84148, 221937, 23309, 10691, 3675, 10922, 58533, 7746, 5740, 54811, 22806, 126017, 84081, 675, 3094, 4194, 672, 79818, 4193, 6884, 54993, 3297, 100129842, 284309, 10626, 54797, 472, 390963, 90333, 730087, 2316, 23633, 5610, 81856, 54737, 92140, 92595, 5562, 23326, 79027, 80169, 2177, 4093, 79830, 7112, 10181, 5429, 9422, 90649, 1111, 7428, 162967, 129685, 7620, 285…	525	4104	16792	1.13786	1	0.726946	59.2276
blca	GOTERM_BP_ALL	GO:2001141~regulation of RNA biosynthetic process	131	21.1632	0.0463932	170959, 91661, 1107, 6871, 331, 84148, 221937, 10691, 23309, 3675, 58533, 7746, 5740, 54811, 22806, 126017, 675, 3094, 4194, 672, 79818, 4193, 6884, 54993, 3297, 100129842, 284309, 10626, 54797, 390963, 90333, 730087, 2316, 23633, 5610, 81856, 54737, 92140, 92595, 5562, 23326, 79027, 2177, 4093, 79830, 7112, 9422, 90649, 1111, 7428, 162967, 129685, 7620, 285315, 27300, 84874, 5814, 2962, 10029351…	525	3644	16792	1.14984	1	0.72583	59.3221
blca	GOTERM_BP_ALL	GO:1903506~regulation of nucleic acid-templated transcription	130	21.0016	0.0505348	170959, 91661, 1107, 6871, 331, 84148, 221937, 10691, 23309, 3675, 58533, 7746, 5740, 54811, 22806, 126017, 675, 3094, 4194, 672, 79818, 4193, 6884, 54993, 3297, 100129842, 284309, 10626, 54797, 390963, 90333, 730087, 2316, 23633, 5610, 81856, 54737, 92140, 92595, 5562, 23326, 79027, 2177, 4093, 79830, 7112, 9422, 90649, 1111, 7428, 162967, 129685, 7620, 285315, 27300, 84874, 5814, 2962, 10029351…	525	3625	16792	1.14704	1	0.742887	62.5401
blca	GOTERM_BP_ALL	GO:0046605~regulation of centrosome cycle	5	0.807754	0.0510888	100526737, 672, 1111, 92421, 79648	525	45	16792	3.55386	1	0.741085	62.9519
blca	GOTERM_BP_ALL	GO:0006355~regulation of transcription, DNA-templated	129	20.8401	0.0539948	170959, 91661, 1107, 6871, 331, 84148, 221937, 10691, 23309, 3675, 58533, 7746, 5740, 54811, 22806, 126017, 675, 3094, 4194, 672, 79818, 4193, 6884, 54993, 3297, 100129842, 284309, 10626, 54797, 390963, 90333, 730087, 2316, 23633, 5610, 81856, 54737, 92140, 92595, 5562, 23326, 79027, 2177, 4093, 79830, 7112, 9422, 90649, 1111, 7428, 162967, 129685, 7620, 285315, 27300, 84874, 5814, 2962, 10029351…	525	3603	16792	1.14517	1	0.751583	65.0421
blca	GOTERM_BP_ALL	GO:0050688~regulation of defense response to virus	7	1.13086	0.0545139	6693, 57506, 200316, 130340, 23369, 5610, 79671	525	87	16792	2.57349	1	0.751364	65.4036
blca	GOTERM_BP_ALL	GO:0031326~regulation of cellular biosynthetic process	151	24.3942	0.0552221	170959, 91661, 1107, 6871, 331, 84148, 221937, 23309, 10691, 3675, 58533, 7746, 5740, 54811, 22806, 126017, 675, 3094, 4194, 255027, 672, 79818, 4193, 6884, 54993, 116496, 3297, 100129842, 284309, 6693, 10626, 54797, 472, 5935, 390963, 90333, 730087, 283459, 2316, 5610, 23633, 81856, 54737, 92140, 92595, 5562, 23326, 79027, 80169, 2177, 112487, 4093, 79830, 7112, 9422, 90649, 57546, 1111, 7428, 1…	525	4284	16792	1.12738	1	0.748821	65.891
blca	GOTERM_BP_ALL	GO:0002831~regulation of response to biotic stimulus	9	1.45396	0.06314	6693, 57506, 200316, 130340, 23369, 5817, 5610, 79671, 23208	525	136	16792	2.11664	1	0.782177	70.9155
blca	GOTERM_BP_ALL	GO:0009889~regulation of biosynthetic process	152	24.5557	0.06408	170959, 91661, 1107, 6871, 331, 84148, 221937, 23309, 10691, 3675, 58533, 7746, 5740, 54811, 22806, 126017, 675, 3094, 4194, 10330, 255027, 672, 79818, 4193, 6884, 54993, 116496, 3297, 100129842, 284309, 6693, 10626, 54797, 472, 5935, 390963, 90333, 730087, 283459, 2316, 5610, 23633, 81856, 54737, 92140, 92595, 5562, 23326, 79027, 80169, 2177, 112487, 4093, 79830, 7112, 9422, 90649, 57546, 1111, …	525	4339	16792	1.12046	1	0.784006	71.4631
blca	GOTERM_BP_ALL	GO:0050792~regulation of viral process	14	2.26171	0.0678716	6693, 27350, 57506, 2962, 23435, 92421, 10465, 200316, 5433, 5478, 130340, 23369, 5610, 79671	525	262	16792	1.70911	1	0.789519	73.5745
blca	GOTERM_BP_ALL	GO:1901532~regulation of hematopoietic progenitor cell differentiation	3	0.484653	0.0690468	201163, 5610, 10443	525	14	16792	6.85388	1	0.790807	74.1982
blca	GOTERM_BP_ALL	GO:2000637~positive regulation of gene silencing by miRNA	3	0.484653	0.0690468	84962, 23369, 8994	525	14	16792	6.85388	1	0.790807	74.1982
blca	GOTERM_BP_ALL	GO:0043122~regulation of I-kappaB kinase/NF-kappaB signaling	13	2.10016	0.0695533	56957, 92140, 1936, 84962, 57506, 8837, 8904, 2316, 51135, 7314, 81858, 79671, 10133	525	238	16792	1.74707	1	0.791789	74.4627
blca	GOTERM_BP_ALL	GO:0051053~negative regulation of DNA metabolic process	8	1.29241	0.0710757	1676, 54552, 675, 201163, 990, 472, 80169, 200316	525	116	16792	2.20585	1	0.79614	75.2424
blca	GOTERM_BP_ALL	GO:0010948~negative regulation of cell cycle process	13	2.10016	0.0739003	63967, 100526737, 988, 4194, 672, 5810, 472, 1111, 92421, 79027, 4193, 7029, 7314	525	240	16792	1.73251	1	0.80482	76.6296
blca	GOTERM_BP_ALL	GO:1902532~negative regulation of intracellular signal transduction	21	3.39257	0.0761777	56957, 6648, 1969, 201163, 4193, 91862, 284996, 285315, 84962, 23612, 3675, 467, 8904, 472, 5562, 126282, 55333, 79671, 10133, 8994, 55654	525	454	16792	1.47947	1	0.81339	77.6942
blca	GOTERM_BP_ALL	GO:0032006~regulation of TOR signaling	6	0.969305	0.0776128	8649, 201163, 5562, 472, 126282, 55654	525	73	16792	2.62888	1	0.813957	78.3412
blca	GOTERM_BP_ALL	GO:0060148~positive regulation of posttranscriptional gene silencing	3	0.484653	0.0780708	84962, 23369, 8994	525	15	16792	6.39695	1	0.813153	78.544
blca	GOTERM_BP_ALL	GO:0010564~regulation of cell cycle process	26	4.20032	0.0831635	63967, 5890, 988, 8678, 79648, 79027, 83695, 80169, 100526737, 675, 4194, 672, 201163, 1111, 5690, 4193, 119504, 7314, 2260, 996, 990, 472, 5810, 92421, 7029, 8558	525	595	16792	1.39765	1	0.824317	80.6804
blca	GOTERM_BP_ALL	GO:1900034~regulation of cellular response to heat	6	0.969305	0.0886891	4928, 348995, 472, 3297, 9631, 9883	525	76	16792	2.52511	1	0.838278	82.7699
blca	GOTERM_BP_ALL	GO:1900063~regulation of peroxisome organization	2	0.323102	0.0907303	57506, 10059	525	3	16792	21.3232	1	0.839306	83.4862
blca	GOTERM_BP_ALL	GO:0051726~regulation of cell cycle	39	6.30048	0.0932881	63967, 5753, 5890, 988, 151195, 8678, 79648, 8649, 5562, 23326, 79027, 83695, 80169, 8522, 100526737, 55771, 675, 4194, 5928, 201163, 672, 1111, 5690, 4193, 65979, 119504, 7314, 10987, 2260, 996, 23435, 990, 5810, 472, 79035, 92421, 7029, 6651, 8558	525	976	16792	1.27808	1	0.845466	84.3439
blca	GOTERM_BP_ALL	GO:0045931~positive regulation of mitotic cell cycle	8	1.29241	0.093452	5890, 675, 990, 23326, 8678, 4193, 8558, 2260	525	124	16792	2.06353	1	0.844845	84.3974
blca	GOTERM_BP_ALL	GO:2000369~regulation of clathrin-mediated endocytosis	3	0.484653	0.0971201	22848, 150696, 23208	525	17	16792	5.64437	1	0.850795	85.5504
brca	GOTERM_BP_ALL	GO:1900117~regulation of execution phase of apoptosis	11	0.436335	0.000534347	1676, 1149, 317, 7976, 80196, 22933, 5740, 5062, 7157, 3297, 10395	2117	25	16792	3.49007	0.988558	0.0441519	1.06651
brca	GOTERM_BP_ALL	GO:1903900~regulation of viral life cycle	38	1.50734	0.00123232	5434, 10206, 27350, 6597, 79720, 4599, 51193, 27183, 56829, 8638, 5478, 5371, 63901, 1025, 5610, 9830, 5987, 10465, 200316, 10155, 4940, 6780, 57506, 140564, 6882, 858, 5034, 27074, 10475, 5359, 2962, 23435, 92421, 5433, 3428, 10450, 91543, 26986	2117	177	16792	1.70291	0.999967	0.0810618	2.44333
brca	GOTERM_BP_ALL	GO:0031647~regulation of protein stability	46	1.82467	0.00138738	23673, 7494, 23032, 54552, 6659, 51100, 55278, 2316, 6871, 5371, 51608, 10694, 5714, 125150, 6790, 10755, 5824, 6789, 3920, 26224, 7375, 56912, 5828, 811, 22848, 5190, 60485, 51701, 4194, 7428, 10491, 4193, 11186, 6880, 284996, 3329, 7320, 10437, 5476, 7248, 91949, 4771, 6720, 56926, 7203, 83548	2117	228	16792	1.60031	0.999991	0.0893951	2.74673
brca	GOTERM_BP_ALL	GO:0051052~regulation of DNA metabolic process	66	2.61801	0.00325797	253980, 1149, 54552, 23201, 225689, 6464, 5371, 55183, 10694, 3480, 6830, 25865, 5888, 10155, 7398, 90381, 675, 7644, 81620, 140564, 672, 5982, 3297, 2260, 54962, 80174, 4751, 472, 3643, 26354, 7203, 5879, 8243, 2625, 317, 2072, 2932, 387522, 1786, 9361, 118460, 1025, 3364, 54737, 1499, 29086, 7336, 80169, 200316, 54069, 811, 7014, 5429, 81931, 7013, 3836, 1111, 53615, 7157, 7320, 146059, 1676, 9…	2117	370	16792	1.41489	1	0.164368	6.33679
brca	GOTERM_BP_ALL	GO:0045069~regulation of viral genome replication	20	0.793336	0.00495791	6780, 57506, 27350, 140564, 4599, 8638, 56829, 5478, 5610, 63901, 10475, 5359, 10465, 200316, 3428, 10155, 10450, 26986, 91543, 4940	2117	81	16792	1.95851	1	0.213605	9.48983
brca	GOTERM_BP_ALL	GO:0031329~regulation of cellular catabolic process	66	2.61801	0.00511284	7494, 8881, 1149, 55905, 56829, 22933, 5371, 5686, 10755, 440503, 51322, 25897, 5887, 5261, 5747, 5690, 5693, 4193, 27074, 7133, 7314, 6880, 3297, 208, 9704, 9709, 32, 5500, 51434, 81892, 51433, 3643, 4085, 26986, 9604, 83752, 5310, 1374, 1452, 317, 6341, 1075, 2932, 5710, 5711, 5714, 10425, 6790, 23198, 7336, 11345, 9529, 3077, 754, 10411, 957, 51684, 119504, 996, 1676, 3667, 10558, 9517, 891, 2…	2117	377	16792	1.38862	1	0.21405	9.77213
brca	GOTERM_BP_ALL	GO:0010638~positive regulation of organelle organization	98	3.88735	0.0054853	7494, 4041, 64112, 6871, 8743, 8678, 5371, 10694, 9141, 7357, 7168, 55023, 253260, 23075, 10155, 23137, 171024, 8396, 2017, 22885, 672, 9917, 6158, 208, 408, 4602, 3687, 4604, 10096, 84334, 472, 85477, 26354, 7203, 55558, 2625, 3998, 51100, 51203, 27183, 84128, 1786, 10425, 4641, 7422, 55005, 54069, 10411, 54741, 7320, 79035, 4771, 891, 841, 10241, 225689, 10856, 57535, 22933, 93624, 255967, 5146…	2117	600	16792	1.29556	1	0.223358	10.4473
brca	GOTERM_BP_ALL	GO:1905269~positive regulation of chromatin organization	21	0.833003	0.00584048	7494, 2625, 672, 10856, 6871, 5371, 1786, 57708, 1025, 7157, 26097, 1499, 93624, 408, 4602, 25865, 7422, 472, 6720, 891, 10155	2117	88	16792	1.89286	1	0.234879	11.0868
brca	GOTERM_BP_ALL	GO:0043903~regulation of symbiosis, encompassing mutualism through parasitism	52	2.06267	0.00589352	5434, 10206, 6772, 6597, 4599, 56829, 8638, 5478, 5371, 5062, 9830, 5987, 8878, 130340, 10155, 3594, 6780, 140564, 6882, 5034, 27074, 23369, 10475, 6693, 5359, 10053, 5879, 26986, 27350, 114609, 79720, 51193, 27183, 63901, 5610, 1025, 4277, 54476, 200316, 10465, 23586, 4940, 57506, 858, 2962, 23435, 92421, 3428, 5433, 10450, 91543, 79671	2117	285	16792	1.44724	1	0.235621	11.1819
brca	GOTERM_BP_ALL	GO:0007346~regulation of mitotic cell cycle	82	3.25268	0.0062781	63967, 5890, 8881, 4041, 6597, 6659, 10403, 8678, 22933, 5371, 5686, 340152, 55023, 6119, 5777, 90381, 23137, 79598, 675, 146691, 301, 4194, 5690, 7976, 5693, 4193, 7314, 7508, 2260, 54962, 80174, 4751, 472, 51434, 8450, 51433, 58190, 3643, 7029, 1613, 4085, 8243, 55920, 7517, 5310, 9368, 5087, 55159, 51203, 348654, 5710, 5048, 5711, 51065, 5714, 1025, 3364, 6790, 1499, 8621, 23198, 83987, 23326,…	2117	491	16792	1.32469	1	0.244359	11.8687
brca	GOTERM_BP_ALL	GO:0010608~posttranscriptional regulation of gene expression	79	3.13368	0.00695766	6774, 6726, 6659, 7298, 55239, 5371, 2099, 5686, 340152, 54952, 84962, 8569, 8668, 27335, 65110, 79882, 23404, 1979, 10131, 64215, 10658, 602, 9611, 2064, 2651, 5690, 51520, 5693, 3488, 56339, 7314, 7133, 23369, 116496, 208, 79693, 1656, 7248, 7072, 5936, 5935, 1613, 26986, 9782, 51123, 283459, 387338, 114609, 26065, 5710, 5711, 16, 118460, 51065, 126374, 5714, 5610, 23198, 55005, 60558, 112487, …	2117	472	16792	1.3276	1	0.259935	13.0698
brca	GOTERM_BP_ALL	GO:2000696~regulation of epithelial cell differentiation involved in kidney development	7	0.277668	0.00721939	2625, 6772, 100133941, 25937, 5613, 1499, 8842	2117	15	16792	3.70159	1	0.267125	13.5283
brca	GOTERM_BP_ALL	GO:0051987~positive regulation of attachment of spindle microtubules to kinetochore	4	0.158667	0.00723938	55920, 891, 22933, 8678	2117	4	16792	7.93198	1	0.266592	13.5633
brca	GOTERM_BP_ALL	GO:2000664~positive regulation of interleukin-5 secretion	4	0.158667	0.00723938	23765, 5590, 2625, 55540	2117	4	16792	7.93198	1	0.266592	13.5633
brca	GOTERM_BP_ALL	GO:0048525~negative regulation of viral process	24	0.952003	0.00755433	57506, 27350, 10206, 6772, 140564, 51193, 4599, 56829, 8638, 5371, 5610, 63901, 9830, 10475, 5359, 4277, 5987, 23435, 200316, 3428, 10155, 79671, 91543, 4940	2117	108	16792	1.76266	1	0.272917	14.1117
brca	GOTERM_BP_ALL	GO:0051988~regulation of attachment of spindle microtubules to kinetochore	6	0.238001	0.00756906	55920, 90417, 4751, 891, 22933, 8678	2117	11	16792	4.32653	1	0.27221	14.1373
brca	GOTERM_BP_ALL	GO:0006417~regulation of translation	60	2.38001	0.00771606	6774, 6726, 6659, 7298, 55239, 2099, 5371, 340152, 54952, 8569, 84962, 8668, 27335, 65110, 1979, 10131, 64215, 10658, 602, 9611, 2064, 51520, 3488, 56339, 23369, 116496, 208, 79693, 1656, 7248, 7072, 5936, 5935, 1613, 26986, 51123, 283459, 387338, 26065, 16, 51065, 126374, 5610, 55005, 60558, 112487, 9811, 8994, 811, 9939, 2733, 1967, 51386, 1965, 192670, 8087, 8664, 6203, 317649, 5433	2117	343	16792	1.38752	1	0.275538	14.3921
brca	GOTERM_BP_ALL	GO:0045071~negative regulation of viral genome replication	14	0.555335	0.00908018	57506, 27350, 140564, 4599, 8638, 56829, 5610, 63901, 5359, 3428, 200316, 10155, 91543, 4940	2117	51	16792	2.17741	1	0.312015	16.7223
brca	GOTERM_BP_ALL	GO:1900024~regulation of substrate adhesion-dependent cell spreading	13	0.515668	0.00988354	811, 91663, 55920, 5747, 2316, 1785, 9270, 23189, 1398, 11078, 10109, 5879, 23603	2117	46	16792	2.24165	1	0.329284	18.0663
brca	GOTERM_BP_ALL	GO:2001252~positive regulation of chromosome organization	30	1.19	0.0109014	7494, 2625, 225689, 10856, 8678, 6871, 5371, 1786, 57708, 10694, 1025, 93624, 1499, 25865, 7422, 10155, 23137, 7014, 672, 7157, 26097, 4602, 408, 472, 4751, 79035, 6720, 891, 26354, 7203	2117	149	16792	1.59704	1	0.347157	19.7396
brca	GOTERM_BP_ALL	GO:0031058~positive regulation of histone modification	19	0.753669	0.0109348	7494, 2625, 672, 10856, 6871, 5371, 1786, 1025, 7157, 26097, 1499, 93624, 408, 4602, 25865, 7422, 472, 6720, 891	2117	81	16792	1.86059	1	0.34672	19.7939
brca	GOTERM_BP_ALL	GO:0033262~regulation of nuclear cell cycle DNA replication	6	0.238001	0.0116443	7014, 54962, 81620, 7013, 80174, 2260	2117	12	16792	3.96599	1	0.35807	20.9402
brca	GOTERM_BP_ALL	GO:0010884~positive regulation of lipid storage	8	0.317334	0.0116584	440503, 1149, 128486, 8399, 32, 4481, 29923, 949	2117	21	16792	3.02171	1	0.357134	20.9629
brca	GOTERM_BP_ALL	GO:0032479~regulation of type I interferon production	24	0.952003	0.0117308	5434, 57506, 3148, 114609, 84282, 5970, 9208, 56829, 7314, 51082, 3329, 1499, 27297, 10475, 81844, 3454, 54476, 3428, 84166, 3654, 23586, 79671, 55718, 5966	2117	112	16792	1.69971	1	0.357627	21.0791
brca	GOTERM_BP_ALL	GO:0010883~regulation of lipid storage	12	0.476002	0.0128384	440503, 1149, 128486, 79068, 8399, 3952, 32, 4481, 29923, 3690, 949, 10062	2117	42	16792	2.26628	1	0.377502	22.8345
brca	GOTERM_BP_ALL	GO:1903050~regulation of proteolysis involved in cellular protein catabolic process	42	1.66601	0.013331	7494, 8881, 5310, 55905, 1452, 6341, 1075, 2932, 5710, 22933, 5711, 5371, 5686, 5714, 10425, 6790, 10755, 51322, 23198, 25897, 7336, 5887, 11345, 9529, 3077, 5747, 5690, 51684, 5693, 4193, 119504, 27074, 7314, 6880, 996, 9709, 51434, 51433, 891, 4085, 9604, 54941	2117	230	16792	1.44845	1	0.386175	23.6034
brca	GOTERM_BP_ALL	GO:0033043~regulation of organelle organization	171	6.78302	0.0138862	91663, 8881, 7494, 4041, 64112, 6773, 10403, 8678, 8743, 6871, 5371, 10694, 91147, 9141, 7357, 7168, 8878, 1723, 23075, 55023, 253260, 10155, 26973, 171024, 23137, 2017, 8396, 9638, 22885, 79598, 27072, 5747, 672, 255027, 9917, 6158, 27, 208, 26000, 4602, 408, 4604, 3687, 10096, 84334, 472, 85477, 26354, 7203, 1613, 55558, 7517, 23637, 2625, 51203, 51100, 3998, 2072, 5048, 348654, 27183, 84128, 1…	2117	1152	16792	1.1774	1	0.39597	24.4612
brca	GOTERM_BP_ALL	GO:1903901~negative regulation of viral life cycle	20	0.793336	0.0139418	57506, 27350, 10206, 140564, 51193, 4599, 56829, 8638, 5371, 5610, 63901, 9830, 5359, 5987, 23435, 200316, 3428, 10155, 91543, 4940	2117	89	16792	1.78247	1	0.395885	24.5466
brca	GOTERM_BP_ALL	GO:0007088~regulation of mitotic nuclear division	28	1.11067	0.0153442	7517, 8881, 4041, 51203, 10403, 348654, 22933, 8678, 6790, 8621, 83987, 55023, 23113, 23137, 79598, 146691, 7013, 1111, 858, 996, 990, 472, 4751, 92421, 891, 3643, 1613, 4085	2117	140	16792	1.5864	1	0.415298	26.6704
brca	GOTERM_BP_ALL	GO:0031056~regulation of histone modification	27	1.071	0.0159081	7494, 23030, 2625, 10856, 6871, 5371, 1786, 1025, 1499, 93624, 10014, 6830, 25865, 7422, 26036, 10411, 672, 1111, 9757, 7157, 26097, 7320, 4602, 408, 472, 6720, 891	2117	134	16792	1.59823	1	0.422872	27.5082
brca	GOTERM_BP_ALL	GO:2000615~regulation of histone H3-K9 acetylation	6	0.238001	0.016988	10014, 10411, 2625, 672, 1111, 26036	2117	13	16792	3.66091	1	0.438901	29.0876
brca	GOTERM_BP_ALL	GO:0072182~regulation of nephron tubule epithelial cell differentiation	6	0.238001	0.016988	2625, 6772, 100133941, 25937, 1499, 8842	2117	13	16792	3.66091	1	0.438901	29.0876
brca	GOTERM_BP_ALL	GO:0033044~regulation of chromosome organization	50	1.98334	0.0171477	7494, 23030, 54552, 225689, 10856, 10403, 8678, 6871, 5371, 10694, 93624, 79648, 6830, 25865, 26036, 10155, 23137, 672, 408, 4602, 4751, 472, 26354, 7203, 4085, 7517, 2625, 2072, 348654, 1786, 57708, 1025, 1499, 10014, 7422, 80169, 7014, 10411, 7013, 26054, 1111, 9757, 7157, 26097, 996, 7320, 990, 79035, 6720, 891	2117	288	16792	1.37708	1	0.440658	29.3184
brca	GOTERM_BP_ALL	GO:1900118~negative regulation of execution phase of apoptosis	5	0.198334	0.0187456	1676, 1149, 7976, 80196, 5062	2117	9	16792	4.40666	1	0.462428	31.5882
brca	GOTERM_BP_ALL	GO:0009895~negative regulation of catabolic process	28	1.11067	0.0199281	1149, 6774, 5970, 6341, 2316, 7327, 22933, 5371, 440503, 10755, 51322, 11345, 9529, 3077, 29934, 51582, 4194, 51684, 23450, 27074, 6880, 9704, 1676, 32, 81892, 2822, 4085, 26986	2117	143	16792	1.55311	1	0.477977	33.2231
brca	GOTERM_BP_ALL	GO:0032781~positive regulation of ATPase activity	11	0.436335	0.0200134	26092, 5359, 120526, 10049, 7168, 7266, 11345, 1785, 163590, 64215, 26097	2117	39	16792	2.23722	1	0.478134	33.3397
brca	GOTERM_BP_ALL	GO:1901990~regulation of mitotic cell cycle phase transition	53	2.10234	0.0208146	63967, 5890, 8881, 6659, 6597, 10403, 22933, 5371, 5686, 340152, 5777, 90381, 4194, 301, 5690, 4193, 5693, 7314, 7508, 80174, 472, 51434, 8450, 51433, 58190, 7029, 4085, 7517, 55920, 5310, 5087, 55159, 348654, 5710, 5711, 51065, 5714, 3364, 6790, 23198, 79027, 29933, 80169, 7013, 119504, 57504, 7157, 996, 5527, 990, 29766, 891, 8558	2117	312	16792	1.34742	1	0.489054	34.4245
brca	GOTERM_BP_ALL	GO:0051783~regulation of nuclear division	31	1.22967	0.0222854	7517, 8881, 4041, 51203, 10403, 348654, 22933, 8678, 6790, 8621, 83987, 55023, 23113, 23137, 811, 79598, 146691, 7013, 1111, 858, 996, 7320, 990, 5810, 472, 4751, 92421, 891, 3643, 1613, 4085	2117	164	16792	1.49934	1	0.507696	36.3725
brca	GOTERM_BP_ALL	GO:0009894~regulation of catabolic process	80	3.17334	0.0280744	8881, 7494, 1149, 55905, 6774, 56829, 22933, 5371, 5686, 949, 10755, 440503, 51322, 25897, 5887, 5261, 9611, 5747, 4194, 5690, 5693, 4193, 23450, 7314, 27074, 7133, 6880, 208, 3297, 9704, 9709, 32, 5500, 51434, 81892, 8450, 51433, 3643, 4085, 26986, 9604, 165324, 83752, 5310, 1374, 1452, 5970, 317, 6341, 1075, 7327, 2316, 2932, 5710, 5711, 10425, 5714, 6790, 23198, 7336, 11345, 6642, 9529, 3077, …	2117	509	16792	1.24668	1	0.572849	43.5185
brca	GOTERM_BP_ALL	GO:0010529~negative regulation of transposition	5	0.198334	0.0281743	7644, 27350, 81931, 140564, 200316	2117	10	16792	3.96599	1	0.572864	43.6349
brca	GOTERM_BP_ALL	GO:0010528~regulation of transposition	5	0.198334	0.0281743	7644, 27350, 81931, 140564, 200316	2117	10	16792	3.96599	1	0.572864	43.6349
brca	GOTERM_BP_ALL	GO:0032481~positive regulation of type I interferon production	16	0.634669	0.0293575	5434, 57506, 3148, 84282, 5970, 9208, 56829, 3329, 1499, 51082, 27297, 3454, 3428, 3654, 23586, 55718	2117	71	16792	1.78749	1	0.582915	44.9956
brca	GOTERM_BP_ALL	GO:2000662~regulation of interleukin-5 secretion	4	0.158667	0.0297506	23765, 5590, 2625, 55540	2117	6	16792	5.28799	1	0.582756	45.4408
brca	GOTERM_BP_ALL	GO:2000667~positive regulation of interleukin-13 secretion	4	0.158667	0.0297506	23765, 5590, 2625, 55540	2117	6	16792	5.28799	1	0.582756	45.4408
brca	GOTERM_BP_ALL	GO:0060964~regulation of gene silencing by miRNA	8	0.317334	0.0307688	84962, 9611, 6774, 2099, 23369, 126374, 8087, 8994	2117	25	16792	2.53823	1	0.59398	46.578
brca	GOTERM_BP_ALL	GO:0043123~positive regulation of I-kappaB kinase/NF-kappaB signaling	33	1.309	0.0313229	843, 1936, 23636, 841, 10206, 114609, 5970, 2316, 56829, 7329, 8743, 387522, 81858, 57708, 5536, 1499, 222068, 92140, 7189, 84962, 7188, 8837, 3654, 51135, 5966, 57506, 3551, 7314, 541468, 10475, 7052, 8915, 6574	2117	182	16792	1.43822	1	0.598103	47.1874
brca	GOTERM_BP_ALL	GO:1903362~regulation of cellular protein catabolic process	43	1.70567	0.0328679	7494, 8881, 5310, 55905, 1452, 6341, 1075, 2932, 5710, 22933, 5711, 5371, 5686, 5714, 10425, 6790, 10755, 51322, 23198, 25897, 7336, 5887, 11345, 9529, 3077, 754, 5747, 5690, 51684, 5693, 4193, 119504, 7314, 27074, 6880, 996, 9709, 51434, 51433, 891, 4085, 9604, 54941	2117	251	16792	1.35886	1	0.608594	48.8518
brca	GOTERM_BP_ALL	GO:0031331~positive regulation of cellular catabolic process	46	1.82467	0.0332922	7494, 8881, 55905, 1374, 1452, 1075, 2932, 5710, 22933, 56829, 5711, 5686, 10425, 5714, 6790, 440503, 23198, 25897, 7336, 5261, 754, 5747, 10411, 957, 5690, 5693, 4193, 119504, 7314, 7133, 3297, 208, 996, 9709, 51434, 3667, 10558, 51433, 9517, 891, 3643, 4085, 2822, 26986, 54941, 9604	2117	272	16792	1.34144	1	0.612153	49.3
brca	GOTERM_BP_ALL	GO:0008360~regulation of cell shape	27	1.071	0.0393588	55785, 1456, 1452, 9368, 2335, 1605, 10395, 10428, 7168, 7422, 221472, 55023, 57464, 147179, 8994, 148170, 5747, 4651, 29780, 301, 54873, 5921, 10458, 11127, 1613, 11149, 10435	2117	145	16792	1.47699	1	0.659195	55.3151
brca	GOTERM_BP_ALL	GO:0034248~regulation of cellular amide metabolic process	60	2.38001	0.0395366	6774, 6726, 6659, 7298, 55239, 2099, 5371, 340152, 54952, 8569, 84962, 8668, 27335, 65110, 1979, 10131, 64215, 10658, 602, 9611, 2064, 51520, 3488, 56339, 23369, 116496, 208, 79693, 1656, 7248, 7072, 5936, 5935, 1613, 26986, 51123, 283459, 387338, 26065, 16, 51065, 126374, 5610, 55005, 60558, 112487, 9811, 8994, 811, 9939, 2733, 1967, 51386, 1965, 192670, 8087, 8664, 6203, 317649, 5433	2117	374	16792	1.27251	1	0.659708	55.4807
brca	GOTERM_BP_ALL	GO:0031330~negative regulation of cellular catabolic process	17	0.674336	0.0397277	6341, 51684, 5371, 27074, 6880, 9704, 440503, 10755, 51322, 1676, 32, 11345, 81892, 9529, 3077, 2822, 26986	2117	80	16792	1.68555	1	0.660343	55.6581
brca	GOTERM_BP_ALL	GO:0010867~positive regulation of triglyceride biosynthetic process	5	0.198334	0.0399488	440503, 6720, 949, 10062, 2822	2117	11	16792	3.60545	1	0.661254	55.8624
brca	GOTERM_BP_ALL	GO:0042177~negative regulation of protein catabolic process	19	0.753669	0.0407861	51582, 4194, 5970, 6341, 7327, 2316, 51684, 22933, 5371, 23450, 27074, 6880, 10755, 51322, 11345, 9529, 3077, 29934, 4085	2117	93	16792	1.62051	1	0.666695	56.6283
brca	GOTERM_BP_ALL	GO:0010506~regulation of autophagy	45	1.78501	0.0412278	7494, 23032, 10206, 10241, 257397, 201475, 140710, 53373, 51100, 57535, 22933, 8678, 84128, 1915, 84148, 92140, 51322, 8878, 4233, 2017, 8396, 9638, 219931, 8408, 22863, 10059, 11180, 27074, 6158, 27, 5476, 523, 149371, 7248, 3952, 1201, 472, 201292, 6720, 10558, 9517, 3428, 58528, 23604, 1613	2117	269	16792	1.32691	1	0.667274	57.0272
brca	GOTERM_BP_ALL	GO:0031998~regulation of fatty acid beta-oxidation	6	0.238001	0.0418381	440503, 83752, 1374, 32, 3667, 208	2117	16	16792	2.97449	1	0.671624	57.5726
brca	GOTERM_BP_ALL	GO:0040029~regulation of gene expression, epigenetic	44	1.74534	0.043439	5434, 8338, 6774, 2932, 22933, 2099, 126374, 1786, 57708, 4641, 51082, 1499, 8467, 10014, 84962, 6830, 5987, 6908, 84629, 94239, 84172, 23304, 10155, 10658, 8994, 9611, 5928, 672, 23347, 1111, 9757, 56339, 23369, 192670, 8087, 53615, 7320, 64425, 25885, 9112, 5936, 3428, 8334, 9643	2117	263	16792	1.32702	1	0.679996	58.9723
brca	GOTERM_BP_ALL	GO:0016239~positive regulation of macroautophagy	11	0.436335	0.0438069	8396, 51322, 10206, 8408, 10241, 201475, 51100, 8878, 10558, 57535, 9517	2117	44	16792	1.98299	1	0.680911	59.2877
brca	GOTERM_BP_ALL	GO:1902275~regulation of chromatin organization	29	1.15034	0.0440467	7494, 23030, 2625, 10856, 6871, 5371, 1786, 57708, 1025, 1499, 93624, 10014, 6830, 25865, 7422, 26036, 10155, 10411, 672, 1111, 9757, 7157, 26097, 7320, 4602, 408, 472, 6720, 891	2117	160	16792	1.43767	1	0.681835	59.492
brca	GOTERM_BP_ALL	GO:1903332~regulation of protein folding	4	0.158667	0.0472532	9141, 9529, 5082, 3309	2117	7	16792	4.53256	1	0.699224	62.1324
brca	GOTERM_BP_ALL	GO:0090267~positive regulation of mitotic cell cycle spindle assembly checkpoint	4	0.158667	0.0472532	7517, 10403, 348654, 4085	2117	7	16792	4.53256	1	0.699224	62.1324
brca	GOTERM_BP_ALL	GO:0002711~positive regulation of T cell mediated immunity	9	0.357001	0.0483864	7189, 3594, 5590, 2625, 22890, 5817, 3133, 91543, 3329	2117	33	16792	2.16327	1	0.706913	63.0257
brca	GOTERM_BP_ALL	GO:1901987~regulation of cell cycle phase transition	54	2.14201	0.0489849	63967, 5890, 8881, 988, 6659, 6597, 10403, 22933, 5371, 5686, 340152, 5777, 90381, 4194, 301, 5690, 4193, 5693, 7314, 7508, 80174, 472, 51434, 8450, 51433, 58190, 7029, 4085, 7517, 55920, 5310, 5087, 55159, 348654, 5710, 5711, 51065, 5714, 3364, 6790, 23198, 79027, 29933, 80169, 7013, 119504, 57504, 7157, 996, 5527, 990, 29766, 891, 8558	2117	336	16792	1.27478	1	0.709323	63.4895
brca	GOTERM_BP_ALL	GO:0090329~regulation of DNA-dependent DNA replication	11	0.436335	0.0502069	8243, 7014, 675, 54962, 81620, 7013, 80174, 5982, 9361, 90381, 2260	2117	45	16792	1.93893	1	0.713154	64.4192
brca	GOTERM_BP_ALL	GO:0032648~regulation of interferon-beta production	11	0.436335	0.0502069	10475, 57506, 114609, 3148, 84282, 3454, 54476, 56829, 23586, 79671, 5966	2117	45	16792	1.93893	1	0.713154	64.4192
brca	GOTERM_BP_ALL	GO:0031397~negative regulation of protein ubiquitination	24	0.952003	0.0530777	8881, 54552, 3301, 6659, 5690, 51684, 5710, 5711, 5693, 5371, 119504, 5686, 7314, 5714, 996, 408, 51434, 51433, 64359, 9529, 891, 3077, 7375, 4085	2117	129	16792	1.47572	1	0.724339	66.5156
brca	GOTERM_BP_ALL	GO:0010866~regulation of triglyceride biosynthetic process	6	0.238001	0.053312	440503, 128486, 6720, 949, 10062, 2822	2117	17	16792	2.79952	1	0.724944	66.6814
brca	GOTERM_BP_ALL	GO:0035358~regulation of peroxisome proliferator activated receptor signaling pathway	5	0.198334	0.054101	440503, 10809, 3952, 5740, 171023	2117	12	16792	3.30499	1	0.728308	67.2341
brca	GOTERM_BP_ALL	GO:0060147~regulation of posttranscriptional gene silencing	8	0.317334	0.0543186	84962, 9611, 6774, 2099, 23369, 126374, 8087, 8994	2117	28	16792	2.26628	1	0.728779	67.385
brca	GOTERM_BP_ALL	GO:0060966~regulation of gene silencing by RNA	8	0.317334	0.0543186	84962, 9611, 6774, 2099, 23369, 126374, 8087, 8994	2117	28	16792	2.26628	1	0.728779	67.385
brca	GOTERM_BP_ALL	GO:0002709~regulation of T cell mediated immunity	12	0.476002	0.0564165	7189, 3594, 6693, 5590, 2625, 54795, 22890, 3077, 5817, 3133, 91543, 3329	2117	52	16792	1.83046	1	0.739573	68.8062
brca	GOTERM_BP_ALL	GO:1901985~positive regulation of protein acetylation	9	0.357001	0.0565563	7494, 408, 10411, 2625, 672, 6659, 10856, 6871, 93624	2117	34	16792	2.09964	1	0.739497	68.8988
brca	GOTERM_BP_ALL	GO:0008156~negative regulation of DNA replication	9	0.357001	0.0565563	8243, 7014, 146059, 675, 54962, 7013, 990, 4771, 3364	2117	34	16792	2.09964	1	0.739497	68.8988
brca	GOTERM_BP_ALL	GO:1903052~positive regulation of proteolysis involved in cellular protein catabolic process	30	1.19	0.0579451	8881, 7494, 55905, 1452, 2932, 1075, 5710, 22933, 5711, 5686, 5714, 10425, 6790, 23198, 25897, 7336, 5747, 5690, 4193, 5693, 119504, 7314, 996, 9709, 51434, 51433, 891, 4085, 9604, 54941	2117	171	16792	1.39158	1	0.745343	69.8044
brca	GOTERM_BP_ALL	GO:0051983~regulation of chromosome segregation	17	0.674336	0.0584339	55920, 7517, 7013, 10403, 348654, 22933, 8678, 23369, 1499, 996, 90417, 990, 4751, 472, 891, 4085, 23137	2117	84	16792	1.60528	1	0.747404	70.1172
brca	GOTERM_BP_ALL	GO:0006275~regulation of DNA replication	22	0.87267	0.0588104	811, 8243, 253980, 7014, 81620, 675, 7013, 6464, 5982, 9361, 3364, 2260, 3480, 146059, 54962, 80174, 990, 4771, 80169, 3643, 5879, 90381	2117	117	16792	1.49148	1	0.748755	70.356
brca	GOTERM_BP_ALL	GO:0032886~regulation of microtubule-based process	26	1.03134	0.0591074	7517, 220134, 2932, 348654, 5048, 24139, 1499, 6790, 79648, 91147, 26973, 100526737, 79598, 57542, 2064, 7013, 672, 26054, 1111, 11186, 23187, 6249, 4751, 92421, 11127, 55036	2117	144	16792	1.43216	1	0.748672	70.5431
brca	GOTERM_BP_ALL	GO:0032878~regulation of establishment or maintenance of cell polarity	7	0.277668	0.0605153	5908, 2625, 889, 22902, 253260, 11127, 23189	2117	23	16792	2.41408	1	0.755199	71.4149
brca	GOTERM_BP_ALL	GO:0010810~regulation of cell-substrate adhesion	31	1.22967	0.0620286	91663, 55920, 8861, 2932, 2316, 2335, 1785, 10395, 7422, 11078, 56477, 811, 5747, 5795, 2013, 2651, 59339, 9270, 6251, 23189, 5921, 1398, 5590, 7248, 4287, 51144, 4771, 10109, 1613, 5879, 23603	2117	179	16792	1.37369	1	0.761187	72.3245
brca	GOTERM_BP_ALL	GO:0006450~regulation of translational fidelity	6	0.238001	0.0664282	6203, 283459, 79693, 51520, 16, 112487	2117	18	16792	2.64399	1	0.776241	74.8155
brca	GOTERM_BP_ALL	GO:0045862~positive regulation of proteolysis	56	2.22134	0.0680203	7494, 8881, 842, 841, 55905, 6774, 2335, 22933, 8743, 5371, 5686, 10395, 9141, 25897, 22900, 5747, 5690, 4193, 5693, 7133, 7314, 3297, 408, 4891, 9709, 84334, 51434, 51433, 4085, 23787, 9604, 23786, 1452, 317, 2932, 1075, 5710, 5711, 51065, 5714, 10425, 6790, 10016, 23198, 7336, 9994, 10845, 119504, 3329, 996, 54205, 8915, 3428, 891, 2822, 54941	2117	358	16792	1.24076	1	0.78097	75.6632
brca	GOTERM_BP_ALL	GO:1902510~regulation of apoptotic DNA fragmentation	4	0.158667	0.0686721	1676, 1149, 317, 3297	2117	8	16792	3.96599	1	0.782545	76.0024
brca	GOTERM_BP_ALL	GO:2000665~regulation of interleukin-13 secretion	4	0.158667	0.0686721	23765, 5590, 2625, 55540	2117	8	16792	3.96599	1	0.782545	76.0024
brca	GOTERM_BP_ALL	GO:0090232~positive regulation of spindle checkpoint	4	0.158667	0.0686721	7517, 10403, 348654, 4085	2117	8	16792	3.96599	1	0.782545	76.0024
brca	GOTERM_BP_ALL	GO:0090068~positive regulation of cell cycle process	41	1.62634	0.0690702	7517, 55920, 5890, 4041, 51379, 5087, 6659, 51203, 10403, 348654, 22933, 8678, 5371, 6790, 10755, 55023, 83695, 23137, 301, 4194, 84440, 7013, 672, 4193, 7314, 57504, 7157, 2260, 9371, 7320, 5527, 80174, 990, 472, 29766, 8450, 891, 3643, 7029, 4085, 8558	2117	251	16792	1.29566	1	0.783682	76.2073
brca	GOTERM_BP_ALL	GO:0010811~positive regulation of cell-substrate adhesion	20	0.793336	0.0704137	811, 91663, 5795, 2013, 2932, 2316, 2335, 59339, 1785, 9270, 6251, 1398, 5590, 7422, 7248, 51144, 11078, 10109, 56477, 5879	2117	106	16792	1.4966	1	0.787753	76.8868
brca	GOTERM_BP_ALL	GO:1903504~regulation of mitotic spindle checkpoint	5	0.198334	0.0705957	7517, 10403, 348654, 891, 4085	2117	13	16792	3.05076	1	0.787801	76.9774
brca	GOTERM_BP_ALL	GO:0090266~regulation of mitotic cell cycle spindle assembly checkpoint	5	0.198334	0.0705957	7517, 10403, 348654, 891, 4085	2117	13	16792	3.05076	1	0.787801	76.9774
brca	GOTERM_BP_ALL	GO:1900119~positive regulation of execution phase of apoptosis	5	0.198334	0.0705957	22933, 5740, 7157, 3297, 10395	2117	13	16792	3.05076	1	0.787801	76.9774
brca	GOTERM_BP_ALL	GO:1903321~negative regulation of protein modification by small protein conjugation or removal	25	0.99167	0.0713303	8881, 54552, 3301, 6659, 5690, 51684, 5710, 5693, 5711, 5371, 119504, 5686, 7314, 5714, 1499, 996, 408, 51434, 51433, 64359, 9529, 891, 3077, 7375, 4085	2117	140	16792	1.41642	1	0.788844	77.3397
brca	GOTERM_BP_ALL	GO:1903902~positive regulation of viral life cycle	18	0.714002	0.0721592	6780, 5434, 6597, 79720, 6882, 51193, 27183, 858, 5478, 5034, 1025, 10475, 2962, 92421, 10465, 5433, 10450, 26986	2117	93	16792	1.53522	1	0.791951	77.742
brca	GOTERM_BP_ALL	GO:0001952~regulation of cell-matrix adhesion	18	0.714002	0.0721592	55920, 5747, 5795, 2013, 8861, 2932, 59339, 9270, 10395, 5921, 5590, 7422, 7248, 4771, 1613, 5879, 56477, 23603	2117	93	16792	1.53522	1	0.791951	77.742
brca	GOTERM_BP_ALL	GO:0001954~positive regulation of cell-matrix adhesion	10	0.396668	0.0745846	5795, 5590, 2013, 7248, 7422, 2932, 59339, 9270, 5879, 56477	2117	42	16792	1.88857	1	0.800656	78.8806
brca	GOTERM_BP_ALL	GO:1903051~negative regulation of proteolysis involved in cellular protein catabolic process	10	0.396668	0.0745846	10755, 51322, 11345, 6341, 51684, 9529, 3077, 5371, 27074, 6880	2117	42	16792	1.88857	1	0.800656	78.8806
brca	GOTERM_BP_ALL	GO:0048524~positive regulation of viral process	20	0.793336	0.0759503	6780, 5434, 6597, 79720, 6882, 51193, 27183, 56829, 858, 5478, 5034, 23369, 1025, 10475, 2962, 92421, 10465, 5433, 10450, 26986	2117	107	16792	1.48261	1	0.805109	79.4971
brca	GOTERM_BP_ALL	GO:0051345~positive regulation of hydrolase activity	131	5.19635	0.076767	84144, 805, 6774, 3148, 2335, 8743, 5371, 2099, 2339, 440503, 9141, 201627, 7168, 22900, 55188, 25791, 64215, 10156, 10160, 5747, 8490, 27, 208, 3297, 50618, 3718, 8394, 29, 26000, 4891, 143872, 408, 5359, 84334, 2760, 10142, 23787, 126432, 23786, 55920, 23637, 317, 51399, 1785, 10016, 6376, 23198, 8649, 7422, 11345, 23092, 55667, 23096, 9994, 10411, 10681, 343578, 163590, 3329, 54205, 23108, 781…	2117	917	16792	1.13314	1	0.805517	79.8576
brca	GOTERM_BP_ALL	GO:1904950~negative regulation of establishment of protein localization	34	1.34867	0.0780507	1149, 5310, 9368, 4188, 6659, 338557, 2932, 7327, 2335, 3604, 5371, 23208, 8620, 3033, 5987, 29934, 10062, 5905, 27202, 64081, 3301, 301, 7013, 51684, 25937, 9270, 80223, 2281, 9727, 6720, 80725, 3667, 91543, 10434	2117	204	16792	1.322	1	0.807904	80.4121
brca	GOTERM_BP_ALL	GO:1902041~regulation of extrinsic apoptotic signaling pathway via death domain receptors	12	0.476002	0.0790912	841, 6810, 658, 8837, 6789, 3148, 467, 5894, 672, 80196, 8743, 3958	2117	55	16792	1.73061	1	0.810734	80.8508
brca	GOTERM_BP_ALL	GO:2000058~regulation of protein ubiquitination involved in ubiquitin-dependent protein catabolic process	19	0.753669	0.0801504	8881, 5747, 51684, 5710, 5690, 5711, 5693, 5371, 119504, 7314, 5686, 5714, 996, 23198, 51434, 51433, 891, 3077, 4085	2117	101	16792	1.49215	1	0.812825	81.2878
brca	GOTERM_BP_ALL	GO:0032204~regulation of telomere maintenance	14	0.555335	0.0803824	7014, 54552, 225689, 7013, 2072, 5371, 10694, 1499, 4751, 472, 79035, 80169, 26354, 7203	2117	68	16792	1.63305	1	0.813019	81.3823
brca	GOTERM_BP_ALL	GO:2000114~regulation of establishment of cell polarity	6	0.238001	0.0811696	5908, 2625, 889, 22902, 253260, 23189	2117	19	16792	2.50484	1	0.814707	81.6994
brca	GOTERM_BP_ALL	GO:0043901~negative regulation of multi-organism process	27	1.071	0.0870921	27350, 10206, 114609, 6772, 4599, 51193, 22933, 56829, 8638, 5371, 63901, 5610, 9830, 4277, 5987, 8878, 200316, 10155, 4940, 57506, 140564, 5359, 10475, 23435, 3428, 91543, 79671	2117	157	16792	1.3641	1	0.825879	83.9259
brca	GOTERM_BP_ALL	GO:1904814~regulation of protein localization to chromosome, telomeric region	5	0.198334	0.0893397	54552, 7013, 5371, 26354, 10694	2117	14	16792	2.83285	1	0.833237	84.7015
brca	GOTERM_BP_ALL	GO:0032736~positive regulation of interleukin-13 production	5	0.198334	0.0893397	23765, 5590, 2625, 55540, 3133	2117	14	16792	2.83285	1	0.833237	84.7015
brca	GOTERM_BP_ALL	GO:0035023~regulation of Rho protein signal transduction	22	0.87267	0.09006	4650, 253980, 55785, 10160, 57480, 5894, 10395, 50618, 23189, 29, 84033, 408, 143872, 286205, 25791, 9855, 221472, 2828, 8477, 64857, 5879, 6654	2117	123	16792	1.41873	1	0.835065	84.9424
brca	GOTERM_BP_ALL	GO:0051893~regulation of focal adhesion assembly	11	0.436335	0.0913371	55920, 5747, 5795, 7248, 7422, 8861, 9270, 1613, 23603, 5879, 10395	2117	50	16792	1.74504	1	0.838089	85.3607
brca	GOTERM_BP_ALL	GO:0090109~regulation of cell-substrate junction assembly	11	0.436335	0.0913371	55920, 5747, 5795, 7248, 7422, 8861, 9270, 1613, 23603, 5879, 10395	2117	50	16792	1.74504	1	0.838089	85.3607
brca	GOTERM_BP_ALL	GO:1904356~regulation of telomere maintenance via telomere lengthening	11	0.436335	0.0913371	7014, 54552, 225689, 7013, 472, 4751, 80169, 5371, 7203, 10694, 1499	2117	50	16792	1.74504	1	0.838089	85.3607
brca	GOTERM_BP_ALL	GO:0051437~positive regulation of ubiquitin-protein ligase activity involved in regulation of mitotic cell cycle transition	15	0.595002	0.0915225	8881, 5710, 5690, 5711, 5693, 119504, 7314, 5686, 5714, 996, 23198, 51434, 51433, 891, 4085	2117	76	16792	1.56552	1	0.838048	85.4205
brca	GOTERM_BP_ALL	GO:0051224~negative regulation of protein transport	32	1.26934	0.0917806	1149, 5310, 9368, 4188, 6659, 338557, 2932, 7327, 2335, 3604, 5371, 23208, 8620, 3033, 5987, 29934, 10062, 5905, 27202, 64081, 301, 51684, 25937, 9270, 80223, 2281, 9727, 6720, 80725, 3667, 91543, 10434	2117	193	16792	1.31515	1	0.838251	85.5034
brca	GOTERM_BP_ALL	GO:1903364~positive regulation of cellular protein catabolic process	31	1.22967	0.092038	8881, 7494, 55905, 1452, 2932, 1075, 5710, 22933, 5711, 5686, 5714, 10425, 6790, 23198, 25897, 7336, 754, 5747, 5690, 4193, 5693, 119504, 7314, 996, 9709, 51434, 51433, 891, 4085, 9604, 54941	2117	186	16792	1.322	1	0.838451	85.5856
brca	GOTERM_BP_ALL	GO:0035330~regulation of hippo signaling	4	0.158667	0.0936353	84962, 4771, 126374, 8994	2117	9	16792	3.52532	1	0.843079	86.0859
brca	GOTERM_BP_ALL	GO:0035751~regulation of lysosomal lumen pH	4	0.158667	0.0936353	84286, 1201, 55858, 5538	2117	9	16792	3.52532	1	0.843079	86.0859
brca	GOTERM_BP_ALL	GO:0032000~positive regulation of fatty acid beta-oxidation	4	0.158667	0.0936353	440503, 1374, 3667, 208	2117	9	16792	3.52532	1	0.843079	86.0859
brca	GOTERM_BP_ALL	GO:1903624~regulation of DNA catabolic process	4	0.158667	0.0936353	1676, 1149, 317, 3297	2117	9	16792	3.52532	1	0.843079	86.0859
brca	GOTERM_BP_ALL	GO:0045088~regulation of innate immune response	55	2.18167	0.0971894	841, 3148, 257397, 5894, 6772, 6773, 56829, 2099, 331, 5686, 64581, 5062, 100507436, 1520, 51135, 5777, 10062, 84282, 5690, 3551, 5693, 25939, 23369, 7314, 83666, 5359, 6223, 3952, 7100, 114609, 26065, 5970, 5710, 5711, 51752, 387522, 5714, 7189, 23198, 3454, 3455, 3654, 1508, 3133, 23586, 57506, 3329, 7322, 8915, 3428, 84166, 5817, 30835, 91543, 79671	2117	360	16792	1.21183	1	0.852378	87.1405
brca	GOTERM_BP_ALL	GO:1902895~positive regulation of pri-miRNA transcription from RNA polymerase II promoter	6	0.238001	0.0974919	7003, 657, 6774, 6597, 5970, 26354	2117	20	16792	2.37959	1	0.852671	87.2266
brca	GOTERM_BP_ALL	GO:0090312~positive regulation of protein deacetylation	6	0.238001	0.0974919	25865, 7422, 6720, 5371, 2339, 7157	2117	20	16792	2.37959	1	0.852671	87.2266
brca	GOTERM_BP_ALL	GO:1900026~positive regulation of substrate adhesion-dependent cell spreading	8	0.317334	0.0995372	811, 1398, 91663, 2316, 11078, 1785, 10109, 5879	2117	32	16792	1.98299	1	0.858164	87.795
brca	GOTERM_BP_ALL	GO:0090207~regulation of triglyceride metabolic process	8	0.317334	0.0995372	440503, 128486, 22863, 79718, 6720, 949, 10062, 2822	2117	32	16792	1.98299	1	0.858164	87.795
brca	GOTERM_BP_ALL	GO:1902186~regulation of viral release from host cell	8	0.317334	0.0995372	10206, 5987, 79720, 92421, 27183, 858, 5371, 10155	2117	32	16792	1.98299	1	0.858164	87.795
brca	GOTERM_BP_ALL	GO:0006448~regulation of translational elongation	7	0.277668	0.0999617	6203, 283459, 79693, 6726, 51520, 16, 112487	2117	26	16792	2.13553	1	0.85879	87.9099
cesc	GOTERM_BP_ALL	GO:0006937~regulation of muscle contraction	3	4.34783	0.0667692	4660, 2316, 6915	48	151	16792	6.95033	1	0.999938	68.3996
cesc	GOTERM_BP_ALL	GO:0042391~regulation of membrane potential	4	5.7971	0.079437	23373, 2316, 10052, 7314	48	360	16792	3.88704	1	0.999451	74.8382
cesc	GOTERM_BP_ALL	GO:0051090~regulation of sequence-specific DNA binding transcription factor activity	4	5.7971	0.0862306	23373, 2316, 5740, 7314	48	373	16792	3.75156	1	0.999337	77.7611
hnsc	GOTERM_BP_ALL	GO:0043900~regulation of multi-organism process	38	3.51852	0.00036706	5437, 27350, 114609, 4599, 51193, 56829, 8638, 5478, 5371, 5062, 1025, 5610, 23208, 6790, 7189, 9830, 4277, 54476, 200316, 104, 130340, 23586, 4940, 3594, 2040, 6780, 57506, 140564, 6882, 85363, 23369, 27074, 6693, 2962, 23435, 5433, 79671, 91543	913	377	16792	1.85385	0.893133	0.0437381	0.710642
hnsc	GOTERM_BP_ALL	GO:0031347~regulation of defense response	54	5	0.00463276	153090, 841, 257397, 6773, 56829, 5371, 331, 7297, 64581, 5062, 23208, 79648, 1520, 5740, 130340, 51135, 3594, 301, 5603, 5690, 85363, 25939, 23369, 7314, 6693, 6223, 114609, 5711, 51752, 387522, 81858, 5610, 7189, 4277, 66005, 3454, 25807, 3455, 54476, 200316, 2177, 3654, 1508, 3133, 23586, 23729, 57506, 4179, 293, 23765, 8915, 5817, 91543, 79671	913	676	16792	1.46919	1	0.211543	8.62559
hnsc	GOTERM_BP_ALL	GO:0050691~regulation of defense response to virus by host	7	0.648148	0.00577925	3594, 57506, 4277, 54476, 200316, 5371, 23586	913	31	16792	4.15306	1	0.237815	10.6486
hnsc	GOTERM_BP_ALL	GO:0080134~regulation of response to stress	91	8.42593	0.00709221	153090, 2054, 841, 257397, 10855, 23201, 7295, 6773, 84959, 56829, 7297, 331, 55183, 5371, 10955, 64581, 91862, 5062, 79648, 23208, 84962, 4928, 1520, 40, 5740, 6119, 130340, 51135, 9043, 3594, 4217, 26156, 6648, 301, 5603, 672, 5690, 4193, 7314, 23369, 25939, 85363, 3309, 3297, 1719, 6693, 6223, 472, 10728, 114609, 55159, 2932, 5711, 387522, 51752, 81858, 5611, 1025, 5610, 9883, 7189, 29086, 427…	913	1285	16792	1.30248	1	0.272956	12.9131
hnsc	GOTERM_BP_ALL	GO:1901988~negative regulation of cell cycle phase transition	18	1.66667	0.00891263	63967, 988, 7013, 4194, 55159, 4193, 5371, 7314, 3364, 6790, 472, 58190, 79027, 891, 29933, 7029, 10457, 4085	913	166	16792	1.99433	1	0.318879	15.963
hnsc	GOTERM_BP_ALL	GO:1901991~negative regulation of mitotic cell cycle phase transition	17	1.57407	0.009613	63967, 7013, 4194, 55159, 4193, 5371, 7314, 3364, 6790, 472, 79027, 58190, 891, 29933, 7029, 10457, 4085	913	154	16792	2.0303	1	0.328029	17.1091
hnsc	GOTERM_BP_ALL	GO:0032205~negative regulation of telomere maintenance	6	0.555556	0.0118526	54552, 7013, 472, 2072, 10111, 5371	913	26	16792	4.24433	1	0.364859	20.6755
hnsc	GOTERM_BP_ALL	GO:0071156~regulation of cell cycle arrest	13	1.2037	0.0141783	153090, 51379, 4194, 672, 4193, 5371, 7314, 11186, 1025, 6790, 472, 891, 7029	913	108	16792	2.21387	1	0.396909	24.2248
hnsc	GOTERM_BP_ALL	GO:2000134~negative regulation of G1/S transition of mitotic cell cycle	12	1.11111	0.0148807	4194, 55159, 472, 79027, 58190, 891, 4193, 5371, 10457, 7029, 7314, 6790	913	96	16792	2.29901	1	0.410132	25.2666
hnsc	GOTERM_BP_ALL	GO:0045089~positive regulation of innate immune response	26	2.40741	0.0164767	153090, 841, 257397, 114609, 56829, 5711, 387522, 5062, 64581, 7189, 1520, 3654, 51135, 3133, 1508, 23586, 57506, 5690, 7314, 23369, 85363, 6223, 8915, 5817, 91543, 79671	913	292	16792	1.63765	1	0.430046	27.584
hnsc	GOTERM_BP_ALL	GO:0071158~positive regulation of cell cycle arrest	11	1.01852	0.0166334	153090, 51379, 4194, 672, 472, 891, 4193, 5371, 7029, 7314, 6790	913	85	16792	2.38016	1	0.429564	27.8078
hnsc	GOTERM_BP_ALL	GO:1902807~negative regulation of cell cycle G1/S phase transition	12	1.11111	0.0196858	4194, 55159, 472, 79027, 58190, 891, 4193, 5371, 10457, 7029, 7314, 6790	913	100	16792	2.20705	1	0.46433	32.0385
hnsc	GOTERM_BP_ALL	GO:2000045~regulation of G1/S transition of mitotic cell cycle	15	1.38889	0.0212021	301, 4194, 55159, 4193, 5371, 7314, 6790, 990, 472, 79027, 58190, 891, 10457, 7029, 8558	913	141	16792	1.95661	1	0.482758	34.0517
hnsc	GOTERM_BP_ALL	GO:0043281~regulation of cysteine-type endopeptidase activity involved in apoptotic process	19	1.75926	0.0246486	4217, 841, 317, 80196, 8743, 4193, 331, 5371, 5062, 27074, 3297, 54205, 7422, 84334, 8915, 22900, 2537, 2821, 23786	913	200	16792	1.74725	1	0.516811	38.4193
hnsc	GOTERM_BP_ALL	GO:0051092~positive regulation of NF-kappaB transcription factor activity	14	1.2963	0.0288322	257397, 114609, 9208, 387522, 7314, 85363, 5610, 92140, 7189, 9830, 8837, 9175, 8915, 3654	913	133	16792	1.93601	1	0.553505	43.3526
hnsc	GOTERM_BP_ALL	GO:0002230~positive regulation of defense response to virus by host	5	0.462963	0.0289141	3594, 57506, 200316, 5371, 23586	913	22	16792	4.18003	1	0.552916	43.4454
hnsc	GOTERM_BP_ALL	GO:0045787~positive regulation of cell cycle	28	2.59259	0.0300007	153090, 5890, 51379, 51203, 5371, 1025, 6790, 10755, 83695, 23137, 675, 301, 4194, 84440, 7013, 672, 4193, 11186, 7314, 9371, 7320, 990, 472, 29766, 891, 7029, 4085, 8558	913	339	16792	1.51911	1	0.563194	44.6622
hnsc	GOTERM_BP_ALL	GO:0033127~regulation of histone phosphorylation	4	0.37037	0.0303396	7320, 472, 891, 1025	913	13	16792	5.65911	1	0.564105	45.0365
hnsc	GOTERM_BP_ALL	GO:0001817~regulation of cytokine production	43	3.98148	0.0319706	5437, 114609, 10855, 150372, 3604, 56829, 5371, 5610, 23208, 7189, 81844, 66005, 3454, 54476, 22900, 3077, 3654, 3133, 375449, 23586, 50848, 3594, 56957, 3595, 57506, 301, 4179, 672, 5603, 9208, 23369, 7314, 3297, 3718, 6693, 27297, 23765, 10626, 8915, 29923, 10457, 79671, 91543	913	577	16792	1.37064	1	0.578634	46.8049
hnsc	GOTERM_BP_ALL	GO:1902806~regulation of cell cycle G1/S phase transition	15	1.38889	0.038966	301, 4194, 55159, 4193, 5371, 7314, 6790, 990, 472, 79027, 58190, 891, 10457, 7029, 8558	913	153	16792	1.80315	1	0.63531	53.7956
hnsc	GOTERM_BP_ALL	GO:0002697~regulation of immune effector process	26	2.40741	0.0503083	3594, 57506, 301, 4179, 56829, 5371, 23369, 118460, 5062, 5610, 3718, 7189, 6693, 6830, 4277, 6223, 8915, 54476, 200316, 130340, 3077, 5817, 3133, 79671, 91543, 23586	913	325	16792	1.47137	1	0.709982	63.3122
hnsc	GOTERM_BP_ALL	GO:0045930~negative regulation of mitotic cell cycle	19	1.75926	0.0526646	63967, 7013, 4194, 55159, 1111, 4193, 5371, 7314, 3364, 6790, 54962, 472, 79027, 58190, 891, 29933, 7029, 10457, 4085	913	219	16792	1.59566	1	0.719824	65.0406
hnsc	GOTERM_BP_ALL	GO:0031396~regulation of protein ubiquitination	21	1.94444	0.0591509	54552, 672, 79699, 5690, 5711, 331, 5371, 119504, 11186, 3309, 7314, 1025, 996, 7189, 440590, 8915, 64359, 891, 3077, 4085, 165324	913	253	16792	1.52662	1	0.743436	69.4085
hnsc	GOTERM_BP_ALL	GO:2000116~regulation of cysteine-type endopeptidase activity	19	1.75926	0.062766	4217, 841, 317, 80196, 8743, 4193, 331, 5371, 5062, 27074, 3297, 54205, 7422, 84334, 8915, 22900, 2537, 2821, 23786	913	224	16792	1.56005	1	0.754657	71.6129
hnsc	GOTERM_BP_ALL	GO:0046782~regulation of viral transcription	8	0.740741	0.0661076	9830, 5437, 2962, 23435, 6882, 51193, 5433, 1025	913	66	16792	2.22935	1	0.762244	73.5157
hnsc	GOTERM_BP_ALL	GO:0033129~positive regulation of histone phosphorylation	3	0.277778	0.0663346	472, 891, 1025	913	8	16792	6.89704	1	0.76228	73.6405
hnsc	GOTERM_BP_ALL	GO:2001251~negative regulation of chromosome organization	11	1.01852	0.0722008	7320, 6830, 54552, 7013, 672, 472, 2072, 891, 10111, 5371, 4085	913	109	16792	1.85608	1	0.783841	76.6782
hnsc	GOTERM_BP_ALL	GO:0001819~positive regulation of cytokine production	29	2.68519	0.0746468	5437, 10855, 114609, 150372, 56829, 5610, 7189, 3454, 22900, 3654, 3133, 23586, 3594, 57506, 3595, 301, 4179, 5603, 672, 9208, 23369, 27297, 6693, 23765, 10626, 8915, 29923, 79671, 91543	913	386	16792	1.38179	1	0.790848	77.844
hnsc	GOTERM_BP_ALL	GO:0050434~positive regulation of viral transcription	6	0.555556	0.0757288	5437, 2962, 6882, 51193, 5433, 1025	913	42	16792	2.62744	1	0.79251	78.3418
hnsc	GOTERM_BP_ALL	GO:0045786~negative regulation of cell cycle	34	3.14815	0.0775703	63967, 153090, 51379, 988, 55159, 5371, 1025, 3364, 79648, 6790, 168451, 8649, 79027, 29933, 8522, 4194, 7013, 672, 1111, 4193, 11186, 7314, 6196, 54962, 9113, 6878, 5810, 472, 58190, 891, 7029, 58528, 10457, 4085	913	470	16792	1.33049	1	0.798506	79.1649
hnsc	GOTERM_BP_ALL	GO:0006282~regulation of DNA repair	9	0.833333	0.0809569	5429, 23201, 29086, 672, 1111, 5371, 387522, 55183, 1025	913	83	16792	1.99433	1	0.806575	80.6017
hnsc	GOTERM_BP_ALL	GO:0051784~negative regulation of nuclear division	7	0.648148	0.0821124	6196, 7013, 472, 5810, 1111, 891, 4085	913	56	16792	2.29901	1	0.808241	81.07
hnsc	GOTERM_BP_ALL	GO:0033047~regulation of mitotic sister chromatid segregation	7	0.648148	0.0821124	996, 7013, 990, 472, 891, 4085, 23137	913	56	16792	2.29901	1	0.808241	81.07
hnsc	GOTERM_BP_ALL	GO:0043154~negative regulation of cysteine-type endopeptidase activity involved in apoptotic process	9	0.833333	0.0900983	841, 7422, 80196, 4193, 2537, 331, 5062, 27074, 2821	913	85	16792	1.9474	1	0.828663	84.0254
hnsc	GOTERM_BP_ALL	GO:0043555~regulation of translation in response to stress	4	0.37037	0.0915028	1965, 5371, 5611, 5610	913	20	16792	3.67842	1	0.830794	84.4977
hnsc	GOTERM_BP_ALL	GO:0071157~negative regulation of cell cycle arrest	4	0.37037	0.0915028	4194, 4193, 11186, 1025	913	20	16792	3.67842	1	0.830794	84.4977
hnsc	GOTERM_BP_ALL	GO:0043902~positive regulation of multi-organism process	14	1.2963	0.0923219	7189, 2040, 6780, 5437, 2962, 6882, 51193, 56829, 104, 5433, 5478, 23369, 1025, 6790	913	159	16792	1.61943	1	0.832689	84.767
hnsc	GOTERM_BP_ALL	GO:0002698~negative regulation of immune effector process	10	0.925926	0.0933412	6693, 4277, 301, 6223, 4179, 3077, 5610, 3133, 79671, 3718	913	100	16792	1.83921	1	0.833431	85.0959
kich	GOTERM_BP_ALL	GO:1905031~regulation of membrane repolarization during cardiac muscle cell action potential	3	0.301205	0.0217318	388591, 2316, 10008	824	5	16792	12.2272	1	0.679904	34.3906
kich	GOTERM_BP_ALL	GO:0048259~regulation of receptor-mediated endocytosis	9	0.903614	0.0473568	4043, 22848, 408, 150696, 5336, 11127, 3077, 55333, 23208	824	82	16792	2.23668	1	0.841531	60.5683
kich	GOTERM_BP_ALL	GO:0098903~regulation of membrane repolarization during action potential	3	0.301205	0.055184	388591, 2316, 10008	824	8	16792	7.64199	1	0.86827	66.3399
kich	GOTERM_BP_ALL	GO:0033688~regulation of osteoblast proliferation	4	0.401606	0.0904337	10855, 387, 5610, 338773	824	22	16792	3.70521	1	0.922344	83.7681
kirc	GOTERM_BP_ALL	GO:2000378~negative regulation of reactive oxygen species metabolic process	13	0.562527	0.00286104	596, 6774, 255027, 3091, 7416, 8678, 22933, 664, 3329, 440503, 9104, 5740, 10131	1953	43	16792	2.59941	1	0.13558	5.59717
kirc	GOTERM_BP_ALL	GO:1903827~regulation of cellular protein localization	87	3.7646	0.00453997	153090, 7205, 5784, 7494, 841, 54552, 7295, 3782, 5371, 10204, 10694, 10541, 23208, 8673, 23613, 9141, 10616, 3675, 22902, 387, 5584, 55333, 4924, 602, 26229, 22885, 2064, 3301, 201163, 84445, 25937, 4193, 9917, 6158, 10575, 3687, 9482, 54828, 6934, 5311, 5310, 5599, 8720, 9368, 7514, 1454, 8650, 2316, 27183, 6809, 9847, 1026, 11030, 10425, 1499, 7332, 7422, 5460, 9478, 3077, 9528, 8996, 23586, 1…	1953	562	16792	1.33102	1	0.18415	8.74173
kirc	GOTERM_BP_ALL	GO:0061418~regulation of transcription from RNA polymerase II promoter in response to hypoxia	10	0.432713	0.00883994	7422, 7322, 7323, 3091, 7428, 22933, 64344, 7314, 112399, 768	1953	32	16792	2.68689	1	0.286188	16.3478
kirc	GOTERM_BP_ALL	GO:0010821~regulation of mitochondrion organization	40	1.73085	0.00919798	841, 5599, 387338, 64112, 6773, 3782, 8678, 7416, 8743, 664, 9361, 51654, 10425, 9141, 7332, 54832, 54978, 8878, 55005, 8996, 2017, 22885, 2395, 596, 54741, 10059, 55072, 201163, 255027, 581, 3091, 115416, 9917, 6158, 285605, 3687, 84334, 7323, 7534, 6720	1953	229	16792	1.50184	1	0.291585	16.9532
kirc	GOTERM_BP_ALL	GO:2000377~regulation of reactive oxygen species metabolic process	29	1.25487	0.00981878	5311, 84275, 7100, 10229, 6774, 64902, 22933, 8678, 7416, 9263, 1785, 1026, 664, 440503, 9104, 8644, 5740, 10131, 596, 6648, 255027, 3091, 7442, 3329, 1719, 50507, 4358, 3643, 5879	1953	153	16792	1.6297	1	0.301422	17.993
kirc	GOTERM_BP_ALL	GO:0032880~regulation of protein localization	136	5.8849	0.0106291	7205, 7494, 4041, 22871, 7295, 94121, 5371, 10204, 9746, 10694, 10541, 8673, 9141, 10616, 3675, 55540, 22902, 59341, 79583, 4924, 602, 22885, 26156, 81285, 3091, 4193, 9917, 6158, 80223, 5552, 5027, 3687, 54795, 54828, 7100, 9368, 7514, 1454, 2316, 8650, 27183, 6809, 192683, 11030, 10425, 7189, 8301, 7332, 7422, 25807, 3133, 23586, 64081, 6810, 27202, 10411, 596, 54741, 55072, 51684, 293, 3329, 2…	1953	962	16792	1.21553	1	0.315315	19.3316
kirc	GOTERM_BP_ALL	GO:2000188~regulation of cholesterol homeostasis	6	0.259628	0.0121735	22913, 3172, 4864, 51, 9971, 10062	1953	13	16792	3.96833	1	0.341998	21.8259
kirc	GOTERM_BP_ALL	GO:0043618~regulation of transcription from RNA polymerase II promoter in response to stress	15	0.64907	0.0157806	7494, 1111, 3091, 7428, 22933, 7314, 768, 3297, 3162, 7422, 7322, 7323, 8440, 64344, 112399	1953	65	16792	1.98417	1	0.402339	27.3687
kirc	GOTERM_BP_ALL	GO:0044093~positive regulation of molecular function	243	10.5149	0.0177228	8881, 6774, 8743, 5371, 949, 2339, 440503, 10616, 64682, 7168, 25791, 3486, 2013, 3091, 3092, 3297, 50618, 3718, 4891, 1719, 10475, 5359, 1491, 23129, 23787, 23786, 55920, 23637, 347735, 317, 51399, 7329, 5610, 55114, 7189, 8301, 92140, 7332, 11345, 8440, 55667, 7185, 51582, 100133941, 2962, 23380, 85358, 153090, 55785, 23032, 842, 841, 4660, 257397, 225689, 6597, 79840, 118, 192111, 84033, 84962…	1953	1840	16792	1.1355	1	0.428547	30.1963
kirc	GOTERM_BP_ALL	GO:0010633~negative regulation of epithelial cell migration	13	0.562527	0.0192784	153090, 64081, 94, 22846, 9270, 91862, 10014, 889, 387, 6672, 5797, 23603, 55333	1953	54	16792	2.0699	1	0.443215	32.3853
kirc	GOTERM_BP_ALL	GO:1904467~regulation of tumor necrosis factor secretion	4	0.173085	0.0239155	84868, 9971, 3329, 23208	1953	6	16792	5.73204	1	0.491248	38.5302
kirc	GOTERM_BP_ALL	GO:0061635~regulation of protein complex stability	4	0.173085	0.0239155	11267, 22863, 8878, 6892	1953	6	16792	5.73204	1	0.491248	38.5302
kirc	GOTERM_BP_ALL	GO:2000189~positive regulation of cholesterol homeostasis	4	0.173085	0.0239155	3172, 4864, 51, 10062	1953	6	16792	5.73204	1	0.491248	38.5302
kirc	GOTERM_BP_ALL	GO:2001233~regulation of apoptotic signaling pathway	58	2.50974	0.0260603	153090, 7494, 841, 64112, 5894, 8743, 5371, 10955, 10616, 9141, 8837, 56917, 10131, 2017, 3301, 6648, 10059, 255027, 201163, 581, 3091, 5034, 57591, 7314, 972, 9709, 8829, 84334, 1491, 1613, 3958, 23604, 1612, 6934, 5599, 9368, 5970, 317, 664, 1499, 6789, 54978, 8440, 9529, 7185, 8996, 754, 6810, 2395, 596, 51741, 80196, 5054, 3162, 6672, 7534, 2534, 2537	1953	380	16792	1.31233	1	0.512481	41.1894
kirc	GOTERM_BP_ALL	GO:0050776~regulation of immune response	126	5.45219	0.0264908	29121, 7494, 6773, 330, 331, 7297, 10695, 8673, 10616, 89857, 5641, 58533, 1520, 79004, 84282, 3551, 3718, 5027, 7412, 5359, 6693, 54795, 10096, 6223, 54923, 56928, 2217, 7100, 114609, 26065, 5144, 5970, 27180, 7189, 23198, 23191, 84888, 51517, 3133, 1508, 23586, 6810, 27202, 596, 55072, 4179, 100133941, 293, 10318, 10417, 3329, 717, 718, 7322, 714, 5338, 7323, 3426, 3428, 5817, 153090, 841, 2573…	1953	912	16792	1.18789	1	0.514968	41.7097
kirc	GOTERM_BP_ALL	GO:0006446~regulation of translational initiation	17	0.735612	0.0282151	5436, 2733, 1967, 4869, 51386, 56339, 5610, 8664, 4528, 8668, 27335, 8890, 8440, 5433, 5936, 1979, 84919	1953	83	16792	1.76105	1	0.524402	43.7505
kirc	GOTERM_BP_ALL	GO:0043620~regulation of DNA-templated transcription in response to stress	15	0.64907	0.0289422	7494, 1111, 3091, 7428, 22933, 7314, 768, 3297, 3162, 7422, 7322, 7323, 8440, 64344, 112399	1953	70	16792	1.84244	1	0.528202	44.5907
kirc	GOTERM_BP_ALL	GO:0010596~negative regulation of endothelial cell migration	10	0.432713	0.0318583	153090, 10014, 94, 387, 889, 22846, 6672, 5797, 9270, 55333	1953	39	16792	2.20463	1	0.55249	47.8415
kirc	GOTERM_BP_ALL	GO:0046822~regulation of nucleocytoplasmic transport	35	1.5145	0.0362418	5311, 153090, 5784, 7205, 7494, 5310, 8720, 7514, 9368, 7295, 2316, 1026, 11030, 10204, 10541, 10616, 387, 5460, 9478, 8996, 23586, 602, 10411, 64081, 57506, 3059, 51684, 25937, 4193, 6672, 5936, 7097, 11261, 6934, 999	1953	214	16792	1.40622	1	0.588665	52.3893
kirc	GOTERM_BP_ALL	GO:0032480~negative regulation of type I interferon production	10	0.432713	0.0370137	57506, 84282, 7318, 84868, 5094, 84166, 7314, 23586, 79671, 29110	1953	40	16792	2.14951	1	0.59242	53.1501
kirc	GOTERM_BP_ALL	GO:0006808~regulation of nitrogen utilization	3	0.129814	0.0373835	596, 581, 9971	1953	3	16792	8.59805	1	0.593082	53.5105
kirc	GOTERM_BP_ALL	GO:0045765~regulation of angiogenesis	36	1.55777	0.0375397	861, 153090, 7494, 5140, 5578, 51752, 5371, 1499, 27286, 92140, 10014, 25865, 7422, 889, 387, 5740, 5797, 55333, 10411, 2064, 2013, 94, 22846, 3091, 9270, 5054, 1942, 3162, 718, 51129, 2828, 6672, 6915, 10457, 2969, 23129	1953	222	16792	1.39428	1	0.593627	53.6618
kirc	GOTERM_BP_ALL	GO:0051129~negative regulation of cellular component organization	88	3.80788	0.0404667	153090, 2580, 54552, 22871, 5894, 24139, 22933, 5371, 5376, 118, 23208, 91147, 3675, 8837, 22902, 387, 59341, 25791, 10062, 90678, 830, 100526737, 8408, 5589, 302, 201163, 255027, 3551, 4193, 3297, 1942, 8829, 472, 85477, 3958, 23603, 51474, 5879, 55558, 54828, 3249, 55920, 54437, 10049, 150696, 57556, 9535, 8650, 2072, 5048, 3601, 1785, 192683, 664, 54739, 6709, 1499, 8301, 54832, 4134, 54978, 1…	1953	624	16792	1.21255	1	0.611749	56.4141
kirc	GOTERM_BP_ALL	GO:0001959~regulation of cytokine-mediated signaling pathway	25	1.08178	0.040819	841, 57506, 26065, 55072, 6773, 100133941, 3091, 5048, 3551, 330, 7297, 3460, 7314, 972, 10616, 3459, 8904, 3454, 3455, 9971, 84166, 3654, 7185, 10062, 8996	1953	143	16792	1.50316	1	0.614017	56.7347
kirc	GOTERM_BP_ALL	GO:0010594~regulation of endothelial cell migration	21	0.908698	0.0422688	153090, 94, 2013, 5578, 22846, 3690, 9270, 949, 1942, 10014, 27286, 25865, 7422, 8829, 387, 889, 6672, 5797, 55333, 4233, 54828	1953	115	16792	1.57008	1	0.621272	58.0305
kirc	GOTERM_BP_ALL	GO:0043457~regulation of cellular respiration	7	0.302899	0.0433449	79085, 201163, 84273, 59341, 3091, 10131, 664	1953	23	16792	2.6168	1	0.626872	58.9684
kirc	GOTERM_BP_ALL	GO:0051128~regulation of cellular component organization	296	12.8083	0.0437006	84275, 7494, 8881, 51379, 6773, 8743, 6871, 5371, 949, 5376, 221937, 91147, 7168, 1729, 388630, 22902, 55540, 3486, 59341, 25791, 8878, 84678, 85464, 57763, 23137, 2017, 27072, 8408, 3091, 3487, 3092, 50618, 3297, 29904, 3490, 10096, 85477, 2023, 55558, 23129, 55920, 23637, 1452, 1454, 8861, 317, 2316, 27183, 5610, 8301, 27286, 7332, 8440, 11346, 411, 811, 64284, 64081, 5345, 54879, 7320, 717, 71…	1953	2323	16792	1.09558	1	0.62899	59.274
kirc	GOTERM_BP_ALL	GO:0010955~negative regulation of protein processing	9	0.389442	0.044018	4179, 330, 5345, 4193, 29934, 331, 9528, 8996, 5054	1953	35	16792	2.21093	1	0.629807	59.5449
kirc	GOTERM_BP_ALL	GO:1903318~negative regulation of protein maturation	9	0.389442	0.044018	4179, 330, 5345, 4193, 29934, 331, 9528, 8996, 5054	1953	35	16792	2.21093	1	0.629807	59.5449
kirc	GOTERM_BP_ALL	GO:2001234~negative regulation of apoptotic signaling pathway	34	1.47122	0.0440991	7494, 841, 5894, 5970, 8743, 1499, 8837, 54978, 9529, 56917, 10131, 8996, 2017, 754, 2395, 596, 3301, 6648, 255027, 581, 3091, 80196, 57591, 972, 5054, 3162, 9709, 8829, 2534, 1491, 2537, 3958, 1612, 6934	1953	210	16792	1.39207	1	0.629549	59.6138
kirc	GOTERM_BP_ALL	GO:1903829~positive regulation of cellular protein localization	54	2.33665	0.0474112	7494, 7205, 841, 54552, 3782, 5371, 10694, 10204, 10541, 23208, 10616, 9141, 3675, 387, 22902, 5584, 55333, 26229, 22885, 2064, 4193, 9917, 6158, 10575, 3687, 6934, 54828, 5599, 2316, 6809, 9847, 11030, 10425, 7332, 7422, 5460, 23586, 10411, 6810, 596, 57506, 54741, 3059, 55072, 9270, 285605, 3976, 7323, 7534, 11127, 2534, 7097, 11261, 999	1953	363	16792	1.27905	1	0.647459	62.3358
kirc	GOTERM_BP_ALL	GO:1903427~negative regulation of reactive oxygen species biosynthetic process	6	0.259628	0.0496228	9104, 6774, 255027, 5740, 10131, 3329	1953	18	16792	2.86602	1	0.654616	64.0553
kirc	GOTERM_BP_ALL	GO:1903020~positive regulation of glycoprotein metabolic process	6	0.259628	0.0496228	5074, 6646, 5861, 1499, 11261, 6934	1953	18	16792	2.86602	1	0.654616	64.0553
kirc	GOTERM_BP_ALL	GO:0033157~regulation of intracellular protein transport	55	2.37992	0.0522313	153090, 7494, 5784, 7205, 7295, 3782, 10204, 10541, 10616, 9141, 387, 22902, 4924, 602, 26229, 22885, 2064, 4193, 25937, 9917, 6158, 3687, 54828, 6934, 5311, 5310, 8720, 7514, 9368, 2316, 9847, 1026, 11030, 10425, 7332, 5460, 9478, 8996, 23586, 10411, 64081, 57506, 54741, 3059, 55072, 51684, 9270, 285605, 6672, 7323, 6720, 11127, 7097, 11261, 999	1953	373	16792	1.26781	1	0.665922	65.9875
kirc	GOTERM_BP_ALL	GO:1903426~regulation of reactive oxygen species biosynthetic process	14	0.605798	0.0527296	5311, 84275, 7100, 6774, 64902, 6648, 255027, 7442, 1785, 3329, 9104, 3643, 5740, 10131	1953	69	16792	1.74453	1	0.66514	66.3452
kirc	GOTERM_BP_ALL	GO:0061136~regulation of proteasomal protein catabolic process	25	1.08178	0.0536459	153090, 7494, 5310, 55905, 1452, 1454, 90637, 2768, 6341, 22933, 10425, 2272, 25897, 11345, 9529, 3077, 7110, 5706, 54467, 51667, 4193, 7314, 115992, 9709, 54941	1953	147	16792	1.46225	1	0.670758	66.9936
kirc	GOTERM_BP_ALL	GO:0017148~negative regulation of translation	25	1.08178	0.0536459	811, 9612, 9611, 26058, 4343, 6774, 6726, 115416, 5371, 56339, 192670, 23369, 5610, 340152, 84962, 23318, 7072, 8890, 5460, 5936, 1979, 1613, 1612, 10658, 8994	1953	147	16792	1.46225	1	0.670758	66.9936
kirc	GOTERM_BP_ALL	GO:0090045~positive regulation of deacetylase activity	4	0.173085	0.0560521	5599, 25865, 7422, 2339	1953	8	16792	4.29903	1	0.68126	68.6404
kirc	GOTERM_BP_ALL	GO:0050778~positive regulation of immune response	94	4.0675	0.058049	153090, 7494, 841, 257397, 5894, 330, 5686, 64581, 10695, 7456, 8673, 10616, 89857, 25865, 5641, 1520, 9971, 84868, 51135, 10062, 51279, 3594, 5074, 5795, 4651, 301, 5706, 581, 5690, 5693, 3551, 7314, 23369, 85363, 972, 5027, 5359, 10096, 6223, 54923, 3958, 10109, 5879, 5719, 7100, 114609, 26065, 5144, 22890, 5970, 150372, 9846, 387522, 118460, 7189, 9473, 23198, 23191, 51517, 3654, 3133, 1508, 2…	1953	684	16792	1.1816	1	0.691013	69.9474
kirc	GOTERM_BP_ALL	GO:0060759~regulation of response to cytokine stimulus	25	1.08178	0.0610412	841, 57506, 26065, 55072, 6773, 100133941, 3091, 5048, 3551, 330, 7297, 3460, 7314, 972, 10616, 3459, 8904, 3454, 3455, 9971, 84166, 3654, 7185, 10062, 8996	1953	149	16792	1.44263	1	0.702359	71.8095
kirc	GOTERM_BP_ALL	GO:0042176~regulation of protein catabolic process	54	2.33665	0.063599	153090, 7494, 8881, 55905, 26088, 90637, 22933, 5371, 5686, 9104, 64682, 25897, 302, 4194, 5706, 54467, 51667, 5690, 4193, 5693, 23450, 7314, 115992, 9709, 51434, 51433, 165324, 5719, 5310, 1452, 7514, 1454, 5970, 2316, 2768, 6341, 10425, 2272, 23198, 25807, 11345, 6642, 9529, 29934, 3077, 11267, 754, 51582, 7110, 51684, 119504, 4287, 2534, 54941	1953	370	16792	1.25485	1	0.710394	73.3138
kirc	GOTERM_BP_ALL	GO:0002682~regulation of immune system process	179	7.74556	0.0641991	29121, 7494, 6773, 330, 5371, 8744, 331, 7297, 10695, 8673, 10616, 83483, 89857, 5641, 1725, 1520, 58533, 59341, 130340, 79004, 22806, 84282, 3091, 3551, 3718, 26258, 5027, 7412, 6693, 5359, 10475, 54795, 10096, 6223, 472, 160, 54923, 10148, 85477, 56928, 2217, 84293, 7100, 114609, 26065, 5144, 8861, 5970, 27180, 5610, 7189, 23198, 23191, 7422, 84888, 25807, 8440, 2177, 51517, 3133, 1508, 23586, …	1953	1378	16792	1.11687	1	0.713084	73.6555
kirc	GOTERM_BP_ALL	GO:0051881~regulation of mitochondrial membrane potential	12	0.519256	0.0682697	84275, 5027, 23593, 84941, 596, 6648, 9481, 4719, 581, 80025, 2537, 7314	1953	58	16792	1.77891	1	0.727991	75.866
kirc	GOTERM_BP_ALL	GO:0045727~positive regulation of translation	18	0.778884	0.0688987	5436, 9612, 9611, 2064, 387338, 4869, 56339, 51654, 116496, 6203, 65110, 5460, 8440, 55005, 5433, 5935, 26986, 602	1953	100	16792	1.54765	1	0.730592	76.1914
kirc	GOTERM_BP_ALL	GO:1903521~positive regulation of mammary gland involution	3	0.129814	0.0690385	7421, 581, 5371	1953	4	16792	6.44854	1	0.730576	76.2632
kirc	GOTERM_BP_ALL	GO:1903519~regulation of mammary gland involution	3	0.129814	0.0690385	7421, 581, 5371	1953	4	16792	6.44854	1	0.730576	76.2632
kirc	GOTERM_BP_ALL	GO:1902339~positive regulation of apoptotic process involved in morphogenesis	3	0.129814	0.0690385	7421, 581, 5371	1953	4	16792	6.44854	1	0.730576	76.2632
kirc	GOTERM_BP_ALL	GO:0060058~positive regulation of apoptotic process involved in mammary gland involution	3	0.129814	0.0690385	7421, 581, 5371	1953	4	16792	6.44854	1	0.730576	76.2632
kirc	GOTERM_BP_ALL	GO:1904747~positive regulation of apoptotic process involved in development	3	0.129814	0.0690385	7421, 581, 5371	1953	4	16792	6.44854	1	0.730576	76.2632
kirc	GOTERM_BP_ALL	GO:0070201~regulation of establishment of protein localization	110	4.75984	0.072549	7494, 7205, 4041, 7295, 94121, 5371, 10204, 10694, 10541, 10616, 9141, 3675, 22902, 55540, 59341, 4924, 602, 22885, 81285, 3091, 4193, 9917, 6158, 80223, 5552, 5027, 3687, 54795, 54828, 7100, 9368, 7514, 2316, 192683, 11030, 10425, 7189, 7332, 25807, 3133, 23586, 10411, 64081, 6810, 27202, 596, 54741, 55072, 51684, 293, 3329, 23433, 23435, 7323, 6672, 7534, 11127, 999, 153090, 5784, 841, 5578, 37…	1953	820	16792	1.1534	1	0.736086	77.9992
kirc	GOTERM_BP_ALL	GO:0010939~regulation of necrotic cell death	7	0.302899	0.0733784	10616, 23593, 841, 8837, 330, 7314, 8996	1953	26	16792	2.31486	1	0.737337	78.3914
kirc	GOTERM_BP_ALL	GO:1900101~regulation of endoplasmic reticulum unfolded protein response	7	0.302899	0.0733784	153090, 7494, 581, 8440, 51283, 84919, 10987	1953	26	16792	2.31486	1	0.737337	78.3914
kirc	GOTERM_BP_ALL	GO:0042762~regulation of sulfur metabolic process	6	0.259628	0.0740034	57546, 5162, 5163, 55066, 1499, 6934	1953	20	16792	2.57942	1	0.738991	78.6825
kirc	GOTERM_BP_ALL	GO:0043462~regulation of ATPase activity	12	0.519256	0.0755067	26092, 9104, 5359, 120526, 10049, 7168, 7266, 483, 11345, 1785, 163590, 26097	1953	59	16792	1.74876	1	0.744875	79.3676
kirc	GOTERM_BP_ALL	GO:1901800~positive regulation of proteasomal protein catabolic process	16	0.692341	0.0759764	153090, 7494, 55905, 1452, 5706, 1454, 90637, 54467, 51667, 4193, 22933, 10425, 115992, 25897, 9709, 54941	1953	87	16792	1.58125	1	0.745706	79.5773
kirc	GOTERM_BP_ALL	GO:1904589~regulation of protein import	28	1.2116	0.0761161	5311, 153090, 7205, 7494, 5310, 8720, 9368, 7295, 2316, 1026, 10204, 11030, 10616, 9141, 387, 5460, 9478, 8996, 23586, 602, 64081, 57506, 3059, 51684, 25937, 7097, 11261, 999	1953	175	16792	1.37569	1	0.745666	79.6392
kirc	GOTERM_BP_ALL	GO:0032436~positive regulation of proteasomal ubiquitin-dependent protein catabolic process	14	0.605798	0.0766337	7494, 55905, 1452, 1454, 90637, 54467, 51667, 4193, 22933, 10425, 115992, 25897, 9709, 54941	1953	73	16792	1.64894	1	0.744615	79.8674
kirc	GOTERM_BP_ALL	GO:2001236~regulation of extrinsic apoptotic signaling pathway	26	1.12505	0.0803911	841, 5894, 5970, 8743, 5371, 10616, 6789, 8837, 7185, 8996, 2017, 6810, 596, 581, 51741, 80196, 5054, 3162, 8829, 6672, 2534, 2537, 3958, 1613, 1612, 6934	1953	161	16792	1.38851	1	0.757061	81.4518
kirc	GOTERM_BP_ALL	GO:1901342~regulation of vasculature development	37	1.60104	0.0824949	861, 153090, 7494, 5140, 5578, 51752, 5371, 1499, 27286, 92140, 10014, 25865, 7422, 889, 387, 5740, 5797, 55333, 10411, 2064, 2013, 94, 22846, 3091, 9270, 5054, 1942, 3162, 718, 51129, 2828, 6672, 6915, 1491, 10457, 2969, 23129	1953	245	16792	1.29848	1	0.762927	82.2865
kirc	GOTERM_BP_ALL	GO:0010632~regulation of epithelial cell migration	27	1.16833	0.0826864	153090, 5578, 949, 91862, 10014, 27286, 3675, 25865, 7422, 387, 889, 5797, 55333, 4233, 411, 64081, 94, 2013, 22846, 3091, 3690, 9270, 1942, 8829, 6672, 23603, 54828	1953	169	16792	1.37365	1	0.763087	82.3607
kirc	GOTERM_BP_ALL	GO:0090559~regulation of membrane permeability	14	0.605798	0.0835447	23593, 841, 596, 5599, 64112, 6774, 255027, 581, 54978, 117145, 7534, 664, 8996, 50848	1953	74	16792	1.62666	1	0.766096	82.6896
kirc	GOTERM_BP_ALL	GO:0032535~regulation of cellular component size	51	2.20684	0.0838154	1002, 7456, 118, 3778, 5987, 22902, 59341, 9798, 85464, 830, 2017, 389541, 5921, 5027, 8829, 10096, 9113, 85477, 10723, 653857, 10109, 5879, 51474, 55558, 23129, 54437, 57556, 9368, 9535, 5048, 1785, 6709, 54434, 363, 7422, 23191, 8440, 5868, 147179, 11267, 57142, 6712, 3059, 4868, 3475, 10552, 29766, 1207, 50809, 85358, 93663	1953	354	16792	1.2387	1	0.765922	82.792
kirc	GOTERM_BP_ALL	GO:0051223~regulation of protein transport	100	4.32713	0.0855106	7494, 7205, 4041, 7295, 94121, 5371, 10204, 10541, 10616, 9141, 22902, 55540, 59341, 4924, 602, 22885, 81285, 3091, 4193, 9917, 6158, 80223, 5552, 5027, 3687, 54795, 54828, 7100, 9368, 7514, 2316, 192683, 11030, 10425, 7189, 7332, 25807, 3133, 23586, 10411, 64081, 6810, 27202, 54741, 55072, 293, 51684, 3329, 23435, 7323, 6672, 11127, 999, 153090, 5784, 5578, 3782, 5478, 23208, 5987, 387, 84868, 9…	1953	746	16792	1.15255	1	0.771046	83.4209
kirc	GOTERM_BP_ALL	GO:1903533~regulation of protein targeting	44	1.90394	0.0856192	153090, 5311, 7494, 7205, 5310, 8720, 7295, 9368, 2316, 3782, 9847, 1026, 11030, 10204, 10425, 10616, 9141, 7332, 387, 5460, 9478, 4924, 8996, 23586, 602, 22885, 64081, 2064, 57506, 54741, 3059, 55072, 51684, 25937, 9270, 9917, 6158, 285605, 3687, 7323, 6720, 7097, 11261, 999	1953	300	16792	1.26105	1	0.770843	83.4605
kirc	GOTERM_BP_ALL	GO:0043085~positive regulation of catalytic activity	199	8.61099	0.0860837	84144, 8881, 6774, 7295, 8743, 5371, 949, 1102, 2339, 10541, 440503, 9141, 201627, 64682, 7168, 483, 3486, 55188, 25791, 57572, 9043, 10160, 2013, 3091, 3690, 3092, 8394, 3718, 50618, 3297, 4891, 5027, 200958, 5359, 1719, 84334, 2760, 51434, 51433, 1612, 112399, 10142, 23787, 23786, 54828, 126432, 55920, 23637, 114609, 347735, 317, 51399, 7329, 1785, 5610, 55114, 7189, 8301, 8649, 23198, 7332, 74…	1953	1559	16792	1.09751	1	0.770809	83.6286
kirc	GOTERM_BP_ALL	GO:0031349~positive regulation of defense response	57	2.46646	0.086357	153090, 841, 257397, 5894, 330, 5686, 64581, 10695, 8673, 55540, 5641, 1520, 59341, 84868, 9971, 51135, 10062, 90678, 5706, 5603, 5690, 5693, 3551, 85363, 23369, 7314, 5359, 6223, 5719, 7100, 114609, 26065, 5970, 961, 387522, 7189, 23198, 3654, 1508, 3133, 23586, 57506, 293, 10318, 5054, 29110, 3329, 23765, 718, 7322, 7323, 2534, 3428, 7097, 84166, 5817, 79671	1953	402	16792	1.21913	1	0.769993	83.7267
kirc	GOTERM_BP_ALL	GO:0048583~regulation of response to stimulus	448	19.3855	0.086432	29121, 7494, 7205, 51379, 6774, 6773, 3281, 330, 8743, 5371, 331, 10616, 3486, 59341, 25791, 79600, 8878, 11097, 602, 2017, 2013, 84282, 6882, 6884, 3487, 50618, 3297, 51162, 5359, 1719, 10096, 6878, 160, 10725, 2217, 10728, 23787, 317, 7329, 27180, 25776, 55114, 84888, 22925, 8440, 811, 100133941, 5345, 7320, 717, 718, 7322, 2828, 7323, 5338, 714, 51283, 2969, 8844, 85358, 843, 842, 841, 79742, …	1953	3636	16792	1.05939	1	0.769657	83.7535
kirc	GOTERM_BP_ALL	GO:0034249~negative regulation of cellular amide metabolic process	25	1.08178	0.0874417	811, 9612, 9611, 26058, 4343, 6774, 6726, 115416, 5371, 56339, 192670, 23369, 5610, 340152, 84962, 23318, 7072, 8890, 5460, 5936, 1979, 1613, 1612, 10658, 8994	1953	155	16792	1.38678	1	0.77248	84.1107
kirc	GOTERM_BP_ALL	GO:0034250~positive regulation of cellular amide metabolic process	20	0.865426	0.08811	5436, 9612, 9611, 2064, 387338, 4869, 1454, 56339, 51654, 116496, 6203, 8301, 65110, 5460, 8440, 55005, 5433, 5935, 26986, 602	1953	118	16792	1.4573	1	0.773257	84.343
kirc	GOTERM_BP_ALL	GO:1901889~negative regulation of cell junction assembly	6	0.259628	0.0882325	55920, 94, 3551, 9270, 23603, 54828	1953	21	16792	2.45659	1	0.773114	84.3853
kirc	GOTERM_BP_ALL	GO:0051248~negative regulation of protein metabolic process	137	5.92817	0.0886858	8881, 7494, 4041, 6774, 330, 331, 5371, 91862, 5536, 11329, 64682, 154043, 3486, 58533, 1979, 602, 4194, 4193, 3551, 3690, 56339, 23450, 116496, 284996, 5037, 5027, 23318, 7072, 51434, 51433, 5936, 871, 1613, 1612, 83891, 9368, 5144, 5970, 2316, 5048, 285464, 5610, 8301, 2272, 7422, 11345, 8440, 11137, 104, 811, 51582, 64081, 26058, 22863, 4179, 51684, 10491, 5345, 10318, 192670, 5054, 7320, 2581…	1953	1049	16792	1.12291	1	0.774288	84.5406
kirc	GOTERM_BP_ALL	GO:0032269~negative regulation of cellular protein metabolic process	130	5.62527	0.0894735	8881, 7494, 4041, 6774, 330, 331, 5371, 91862, 5536, 11329, 64682, 154043, 3486, 58533, 1979, 4193, 3551, 56339, 116496, 284996, 5037, 5027, 23318, 7072, 51434, 51433, 5936, 871, 1613, 1612, 83891, 9368, 5144, 5048, 285464, 5610, 8301, 2272, 7422, 11345, 11137, 8440, 104, 811, 64081, 26058, 22863, 4179, 51684, 10491, 5345, 10318, 192670, 5054, 7320, 25816, 718, 23435, 5576, 3428, 84919, 2821, 153…	1953	992	16792	1.12676	1	0.775515	84.807
kirc	GOTERM_BP_ALL	GO:0046825~regulation of protein export from nucleus	8	0.34617	0.0924717	5784, 10411, 7514, 7295, 6672, 4193, 10541, 6934	1953	34	16792	2.02307	1	0.782722	85.7817
kirc	GOTERM_BP_ALL	GO:1902042~negative regulation of extrinsic apoptotic signaling pathway via death domain receptors	8	0.34617	0.0924717	841, 3162, 8837, 5894, 80196, 8743, 1612, 5054	1953	34	16792	2.02307	1	0.782722	85.7817
kirc	GOTERM_BP_ALL	GO:0030100~regulation of endocytosis	31	1.34141	0.0948451	4043, 150696, 22871, 961, 1785, 949, 192683, 23208, 8301, 7422, 11037, 3077, 29934, 5868, 10062, 55333, 90678, 811, 64284, 22848, 302, 286749, 636, 3092, 5054, 717, 29904, 718, 11127, 3958, 5879	1953	202	16792	1.3195	1	0.789688	86.5109
kirc	GOTERM_BP_ALL	GO:0032434~regulation of proteasomal ubiquitin-dependent protein catabolic process	19	0.822155	0.0962662	153090, 7494, 55905, 1452, 1454, 90637, 2768, 54467, 51667, 4193, 22933, 10425, 2272, 115992, 25897, 9709, 9529, 3077, 54941	1953	112	16792	1.4586	1	0.793606	86.9303
kirc	GOTERM_BP_ALL	GO:0010822~positive regulation of mitochondrion organization	27	1.16833	0.097059	841, 387338, 5599, 64112, 3782, 8743, 8678, 664, 10425, 51654, 9141, 7332, 55005, 22885, 596, 54741, 55072, 10059, 581, 3091, 9917, 6158, 285605, 3687, 84334, 7323, 7534	1953	172	16792	1.34969	1	0.795819	87.1589
kirc	GOTERM_BP_ALL	GO:0042306~regulation of protein import into nucleus	27	1.16833	0.097059	5311, 153090, 7205, 7494, 5310, 8720, 9368, 7295, 2316, 1026, 10204, 11030, 10616, 387, 5460, 9478, 8996, 23586, 602, 64081, 57506, 3059, 51684, 25937, 7097, 11261, 999	1953	172	16792	1.34969	1	0.795819	87.1589
kirc	GOTERM_BP_ALL	GO:0070613~regulation of protein processing	15	0.64907	0.0971935	27202, 4179, 330, 4193, 5345, 331, 5054, 717, 718, 3426, 3633, 9528, 29934, 8996, 3249	1953	83	16792	1.55387	1	0.795112	87.1973
kirc	GOTERM_BP_ALL	GO:1900180~regulation of protein localization to nucleus	33	1.42795	0.0978407	5311, 153090, 7205, 7494, 5310, 8720, 7295, 9368, 2316, 1026, 11030, 10204, 10694, 10616, 387, 5460, 9478, 8996, 23586, 602, 64081, 57506, 3059, 201163, 84445, 51684, 25937, 10575, 3976, 2534, 7097, 11261, 999	1953	218	16792	1.30154	1	0.796791	87.3805
kirc	GOTERM_BP_ALL	GO:0090200~positive regulation of release of cytochrome c from mitochondria	7	0.302899	0.0986121	9141, 64112, 84334, 10059, 581, 8743, 664	1953	28	16792	2.14951	1	0.79888	87.5957
kirc	GOTERM_BP_ALL	GO:1901222~regulation of NIK/NF-kappaB signaling	10	0.432713	0.0989064	811, 7189, 55075, 114609, 8904, 5970, 56672, 84868, 3654, 5610	1953	48	16792	1.79126	1	0.79931	87.6768
kirc	GOTERM_BP_ALL	GO:1902882~regulation of response to oxidative stress	13	0.562527	0.0994953	5151, 23593, 9104, 5074, 1719, 6648, 7295, 3091, 9529, 5034, 10131, 8996, 4233	1953	69	16792	1.61992	1	0.800165	87.8377
kirp	GOTERM_BP_ALL	GO:0090043~regulation of tubulin deacetylation	3	0.250836	0.0447698	10474, 6871, 2339	995	6	16792	8.43819	1	0.8128	59.003
kirp	GOTERM_BP_ALL	GO:0032717~negative regulation of interleukin-8 production	4	0.334448	0.0551857	56957, 408, 301, 307	995	15	16792	4.50037	1	0.847079	66.8827
kirp	GOTERM_BP_ALL	GO:0032727~positive regulation of interferon-alpha production	4	0.334448	0.075616	57506, 56829, 23586, 3329	995	17	16792	3.97091	1	0.888392	78.3614
kirp	GOTERM_BP_ALL	GO:0060390~regulation of SMAD protein import into nucleus	4	0.334448	0.075616	64081, 5460, 25937, 11030	995	17	16792	3.97091	1	0.888392	78.3614
kirp	GOTERM_BP_ALL	GO:0033632~regulation of cell-cell adhesion mediated by integrin	3	0.250836	0.0772632	9780, 1803, 5420	995	8	16792	6.32864	1	0.892739	79.0998
kirp	GOTERM_BP_ALL	GO:0031952~regulation of protein autophosphorylation	6	0.501672	0.085451	29904, 55364, 7422, 9961, 10111, 10457	995	40	16792	2.53146	1	0.905944	82.4291
lihc	GOTERM_BP_ALL	GO:1903317~regulation of protein maturation	13	1.27576	0.00112554	717, 2734, 718, 7036, 4179, 2161, 3633, 5345, 4193, 331, 731, 5054, 3249	860	84	16792	3.02182	0.998368	0.103073	2.14926
lihc	GOTERM_BP_ALL	GO:0051917~regulation of fibrinolysis	5	0.490677	0.00450741	2147, 2161, 5345, 350, 5054	860	14	16792	6.97342	1	0.251196	8.34665
lihc	GOTERM_BP_ALL	GO:1900048~positive regulation of hemostasis	6	0.588813	0.00782379	2147, 2161, 6915, 5345, 350, 5054	860	25	16792	4.68614	1	0.352472	14.0613
lihc	GOTERM_BP_ALL	GO:0030194~positive regulation of blood coagulation	6	0.588813	0.00782379	2147, 2161, 6915, 5345, 350, 5054	860	25	16792	4.68614	1	0.352472	14.0613
lihc	GOTERM_BP_ALL	GO:0050820~positive regulation of coagulation	6	0.588813	0.00928684	2147, 2161, 6915, 5345, 350, 5054	860	26	16792	4.5059	1	0.394458	16.4734
lihc	GOTERM_BP_ALL	GO:0010755~regulation of plasminogen activation	4	0.392542	0.0122135	2161, 5345, 5054, 3249	860	10	16792	7.81023	1	0.458995	21.1074
lihc	GOTERM_BP_ALL	GO:0051918~negative regulation of fibrinolysis	4	0.392542	0.0122135	2147, 5345, 350, 5054	860	10	16792	7.81023	1	0.458995	21.1074
lihc	GOTERM_BP_ALL	GO:1900047~negative regulation of hemostasis	7	0.686948	0.0288166	2147, 2161, 5345, 5624, 350, 5054, 348	860	46	16792	2.97128	1	0.633533	43.1139
lihc	GOTERM_BP_ALL	GO:0030195~negative regulation of blood coagulation	7	0.686948	0.0288166	2147, 2161, 5345, 5624, 350, 5054, 348	860	46	16792	2.97128	1	0.633533	43.1139
lihc	GOTERM_BP_ALL	GO:1903894~regulation of IRE1-mediated unfolded protein response	4	0.392542	0.0318133	153090, 51283, 3309, 10987	860	14	16792	5.57874	1	0.657411	46.4064
lihc	GOTERM_BP_ALL	GO:0050819~negative regulation of coagulation	7	0.686948	0.0412455	2147, 2161, 5345, 5624, 350, 5054, 348	860	50	16792	2.73358	1	0.711698	55.6303
lihc	GOTERM_BP_ALL	GO:0045869~negative regulation of single stranded viral RNA replication via double stranded DNA intermediate	3	0.294406	0.0462396	140564, 200316, 10155	860	7	16792	8.36811	1	0.738762	59.8831
lihc	GOTERM_BP_ALL	GO:0045834~positive regulation of lipid metabolic process	12	1.17763	0.0581254	440503, 51085, 2147, 1374, 22863, 341, 6720, 10558, 949, 2822, 348, 345275	860	126	16792	1.85958	1	0.794019	68.5039
lihc	GOTERM_BP_ALL	GO:0045807~positive regulation of endocytosis	11	1.07949	0.0638342	717, 29904, 3673, 57118, 718, 7036, 10960, 3077, 57817, 55333, 5054	860	113	16792	1.90072	1	0.814694	71.9897
lihc	GOTERM_BP_ALL	GO:1900046~regulation of hemostasis	9	0.883219	0.0651554	2054, 2147, 2161, 6915, 5345, 5624, 350, 5054, 348	860	84	16792	2.09203	1	0.818506	72.7426
lihc	GOTERM_BP_ALL	GO:0030193~regulation of blood coagulation	9	0.883219	0.0651554	2054, 2147, 2161, 6915, 5345, 5624, 350, 5054, 348	860	84	16792	2.09203	1	0.818506	72.7426
lihc	GOTERM_BP_ALL	GO:0097006~regulation of plasma lipoprotein particle levels	7	0.686948	0.0654254	6646, 10330, 4481, 341, 949, 2822, 348	860	56	16792	2.4407	1	0.818458	72.8941
lihc	GOTERM_BP_ALL	GO:0090208~positive regulation of triglyceride metabolic process	4	0.392542	0.0701853	440503, 6720, 949, 2822	860	19	16792	4.11065	1	0.833924	75.437
lihc	GOTERM_BP_ALL	GO:0045091~regulation of single stranded viral RNA replication via double stranded DNA intermediate	3	0.294406	0.074092	140564, 200316, 10155	860	9	16792	6.50853	1	0.847849	77.3534
lihc	GOTERM_BP_ALL	GO:0001937~negative regulation of endothelial cell proliferation	5	0.490677	0.0786459	94, 889, 55333, 350, 348	860	32	16792	3.05087	1	0.85586	79.4083
lihc	GOTERM_BP_ALL	GO:1903319~positive regulation of protein maturation	4	0.392542	0.079554	718, 7036, 2161, 3249	860	20	16792	3.90512	1	0.855747	79.7963
lihc	GOTERM_BP_ALL	GO:0050818~regulation of coagulation	9	0.883219	0.0849868	2054, 2147, 2161, 6915, 5345, 5624, 350, 5054, 348	860	89	16792	1.9745	1	0.867962	81.9769
lihc	GOTERM_BP_ALL	GO:0061045~negative regulation of wound healing	7	0.686948	0.0853199	2147, 2161, 5345, 5624, 350, 5054, 348	860	60	16792	2.27798	1	0.867989	82.1031
lihc	GOTERM_BP_ALL	GO:0043496~regulation of protein homodimerization activity	4	0.392542	0.0894322	54552, 114609, 3309, 9043	860	21	16792	3.71916	1	0.875772	83.5932
lihc	GOTERM_BP_ALL	GO:0046889~positive regulation of lipid biosynthetic process	7	0.686948	0.0907606	440503, 51085, 6720, 949, 2822, 348, 345275	860	61	16792	2.24064	1	0.877753	84.0489
luad	GOTERM_BP_ALL	GO:0009896~positive regulation of catabolic process	43	2.35616	0.0182033	153090, 5436, 7494, 55905, 1374, 1452, 90637, 1075, 22933, 5711, 56829, 5686, 10425, 6790, 440503, 25897, 25807, 6642, 5261, 101, 754, 11267, 6811, 10411, 5706, 957, 3091, 5690, 5693, 4193, 119504, 7314, 3297, 996, 5027, 9709, 4287, 51434, 10558, 891, 26986, 255488, 54941	1526	333	16792	1.42093	1	0.492704	30.5972
luad	GOTERM_BP_ALL	GO:0045070~positive regulation of viral genome replication	8	0.438356	0.0262726	2040, 6732, 10475, 104, 10465, 5478, 10450, 26986	1526	33	16792	2.66762	1	0.577971	41.0996
luad	GOTERM_BP_ALL	GO:0070243~regulation of thymocyte apoptotic process	5	0.273973	0.0323516	3091, 101, 7157, 3718, 1942	1526	14	16792	3.92998	1	0.617053	47.9952
luad	GOTERM_BP_ALL	GO:0035024~negative regulation of Rho protein signal transduction	5	0.273973	0.0410288	253980, 143872, 286205, 3675, 10395	1526	15	16792	3.66798	1	0.673771	56.5223
luad	GOTERM_BP_ALL	GO:0033634~positive regulation of cell-cell adhesion mediated by integrin	3	0.164384	0.0436787	9780, 10563, 5420	1526	4	16792	8.25295	1	0.687031	58.8496
luad	GOTERM_BP_ALL	GO:0051984~positive regulation of chromosome segregation	6	0.328767	0.0437998	55920, 990, 891, 22933, 8678, 23137	1526	22	16792	3.00107	1	0.686826	58.9531
luad	GOTERM_BP_ALL	GO:0051091~positive regulation of sequence-specific DNA binding transcription factor activity	30	1.64384	0.0506947	4041, 257397, 114609, 200186, 6597, 150372, 387522, 5610, 3383, 1499, 9830, 92140, 7189, 7188, 57118, 23373, 8837, 5987, 3654, 7185, 101, 23586, 57506, 4869, 3551, 7314, 85363, 10475, 9175, 7097	1526	233	16792	1.41682	1	0.714923	64.4537
luad	GOTERM_BP_ALL	GO:0060338~regulation of type I interferon-mediated signaling pathway	8	0.438356	0.059075	57506, 6772, 3454, 6773, 3455, 84166, 7297, 5777	1526	39	16792	2.25722	1	0.751952	70.1989
luad	GOTERM_BP_ALL	GO:0010574~regulation of vascular endothelial growth factor production	7	0.383562	0.065106	718, 10855, 672, 136, 3091, 147372, 10204	1526	32	16792	2.40711	1	0.773183	73.7753
luad	GOTERM_BP_ALL	GO:1901298~regulation of hydrogen peroxide-mediated programmed cell death	4	0.219178	0.0709536	5074, 2309, 10131, 4233	1526	11	16792	4.00143	1	0.78693	76.8509
luad	GOTERM_BP_ALL	GO:0042993~positive regulation of transcription factor import into nucleus	9	0.493151	0.0797751	7494, 57506, 3059, 55929, 387, 2316, 7097, 23586, 999	1526	50	16792	1.98071	1	0.8082	80.8505
luad	GOTERM_BP_ALL	GO:0051246~regulation of protein metabolic process	248	13.589	0.0806943	7494, 6774, 6773, 90637, 6871, 5371, 331, 2339, 11329, 22900, 3486, 8878, 1979, 55643, 602, 51562, 2013, 10330, 388121, 56339, 27074, 3297, 284996, 4891, 29904, 7072, 55655, 23786, 5753, 1452, 317, 2316, 1075, 7329, 16, 126374, 5610, 7189, 112487, 375449, 51582, 811, 64081, 2309, 10491, 51684, 717, 7320, 6203, 718, 2821, 8844, 153090, 63967, 841, 55905, 257397, 10956, 3383, 10755, 84962, 25897, 2…	1526	2512	16792	1.08638	1	0.811153	81.2273
luad	GOTERM_BP_ALL	GO:0002888~positive regulation of myeloid leukocyte mediated immunity	5	0.273973	0.0874192	6810, 718, 136, 9846, 8673	1526	19	16792	2.89577	1	0.823745	83.7769
luad	GOTERM_BP_ALL	GO:1904816~positive regulation of protein localization to chromosome, telomeric region	4	0.219178	0.0884342	54552, 5371, 26354, 10694	1526	12	16792	3.66798	1	0.825924	84.1319
luad	GOTERM_BP_ALL	GO:0045732~positive regulation of protein catabolic process	31	1.69863	0.0921088	153090, 7494, 55905, 1452, 90637, 1075, 22933, 5711, 5686, 10425, 6790, 25897, 25807, 6642, 101, 11267, 754, 6811, 5706, 5690, 4193, 5693, 119504, 7314, 996, 9709, 4287, 51434, 891, 54941, 255488	1526	257	16792	1.32732	1	0.835078	85.3564
luad	GOTERM_BP_ALL	GO:0010575~positive regulation of vascular endothelial growth factor production	6	0.328767	0.0925818	718, 10855, 672, 136, 3091, 147372	1526	27	16792	2.44532	1	0.83523	85.5073
luad	GOTERM_BP_ALL	GO:0000083~regulation of transcription involved in G1/S transition of mitotic cell cycle	6	0.328767	0.0925818	4998, 1719, 990, 7298, 6241, 25988	1526	27	16792	2.44532	1	0.83523	85.5073
luad	GOTERM_BP_ALL	GO:0035331~negative regulation of hippo signaling	3	0.164384	0.0966401	84962, 126374, 8994	1526	6	16792	5.50197	1	0.840069	86.743
luad	GOTERM_BP_ALL	GO:0098910~regulation of atrial cardiac muscle cell action potential	3	0.164384	0.0966401	54795, 388591, 2316	1526	6	16792	5.50197	1	0.840069	86.743
lusc	GOTERM_BP_ALL	GO:0010730~negative regulation of hydrogen peroxide biosynthetic process	2	0.219058	0.0890419	6774, 255027	766	2	16792	21.9217	1	0.894219	83.3423
prad	GOTERM_BP_ALL	GO:0090073~positive regulation of protein homodimerization activity	3	0.353357	0.0506318	54552, 9618, 114609	695	9	16792	8.05372	1	0.810192	63.0524
prad	GOTERM_BP_ALL	GO:0099623~regulation of cardiac muscle cell membrane repolarization	4	0.471143	0.0747354	781, 776, 388591, 10008	695	24	16792	4.02686	1	0.879566	77.4284
prad	GOTERM_BP_ALL	GO:0032897~negative regulation of viral transcription	4	0.471143	0.0904443	10206, 5987, 23435, 51193	695	26	16792	3.7171	1	0.90718	83.7424
stad	GOTERM_BP_ALL	GO:1902531~regulation of intracellular signal transduction	76	11.1437	0.0136299	1936, 253980, 55785, 7494, 51379, 6774, 10855, 6464, 6772, 121665, 56829, 10955, 222068, 84962, 11329, 25865, 387, 3633, 84868, 10131, 55333, 9043, 5329, 56957, 9611, 5747, 6648, 6009, 3094, 5175, 6884, 5982, 3092, 23369, 5034, 284996, 6878, 545, 6654, 4644, 55654, 3707, 19, 387522, 81858, 5610, 3364, 6790, 8797, 8904, 8795, 5562, 286827, 5305, 3654, 101, 57158, 388325, 598, 957, 10848, 7156, 866…	572	1714	16792	1.30169	1	0.629798	23.0438
stad	GOTERM_BP_ALL	GO:0080135~regulation of cellular response to stress	31	4.54545	0.0155177	165918, 842, 7494, 55159, 387522, 10955, 23279, 5610, 84962, 348995, 54832, 9972, 10131, 9043, 9631, 5074, 9611, 26156, 7014, 6648, 598, 3309, 5034, 51366, 10987, 1719, 7266, 545, 7531, 10595, 10728	572	581	16792	1.56636	1	0.652822	25.8067
stad	GOTERM_BP_ALL	GO:0010605~negative regulation of macromolecule metabolic process	98	14.3695	0.0175826	7494, 6774, 6772, 6207, 23279, 23468, 11329, 10921, 84678, 51773, 10330, 79718, 6688, 79818, 3718, 284996, 51366, 116496, 7072, 545, 51434, 11146, 51433, 5933, 26986, 7514, 5610, 8301, 23019, 2274, 7421, 23394, 80169, 9631, 51582, 64081, 22863, 8661, 53615, 285315, 10499, 996, 150290, 718, 5814, 6670, 5576, 7323, 5433, 7531, 10595, 165918, 7707, 5686, 10755, 84962, 5987, 84629, 94239, 84868, 9972…	572	2326	16792	1.23687	1	0.662325	28.7213
stad	GOTERM_BP_ALL	GO:1901224~positive regulation of NIK/NF-kappaB signaling	5	0.733138	0.0223764	8797, 8795, 84868, 3654, 5610	572	32	16792	4.58698	1	0.706145	35.0747
stad	GOTERM_BP_ALL	GO:0009892~negative regulation of metabolic process	104	15.2493	0.0249176	7494, 6774, 6772, 6207, 23279, 23468, 11329, 10921, 84678, 51773, 10131, 10330, 79718, 6688, 79818, 116496, 3718, 284996, 51366, 7072, 545, 51434, 11146, 51433, 5933, 26986, 7514, 7416, 5610, 8301, 23019, 2274, 7421, 5562, 23394, 80169, 9631, 51582, 64081, 22863, 8661, 53615, 3329, 285315, 10499, 996, 150290, 5814, 718, 6670, 5576, 7323, 5433, 7531, 10595, 165918, 140710, 7707, 5686, 10755, 84962…	572	2522	16792	1.21058	1	0.699153	38.2213
stad	GOTERM_BP_ALL	GO:0032647~regulation of interferon-alpha production	4	0.58651	0.0289882	84868, 56829, 23586, 3329	572	20	16792	5.87133	1	0.728479	42.9621
stad	GOTERM_BP_ALL	GO:0009966~regulation of signal transduction	111	16.2757	0.0294718	7494, 51379, 6774, 6772, 6773, 7297, 11329, 6868, 10131, 9043, 5747, 6009, 2013, 3094, 5175, 6884, 3092, 5034, 284996, 9736, 51366, 5359, 6878, 545, 55654, 1452, 19, 2788, 1075, 8650, 81858, 4641, 5610, 23019, 5562, 286827, 101, 57158, 64081, 598, 8661, 128869, 53615, 285315, 10499, 150290, 718, 7052, 5810, 7531, 10595, 11124, 1936, 253980, 55785, 9969, 10855, 6464, 121665, 10580, 56829, 10955, 5…	572	2728	16792	1.1945	1	0.728373	43.5019
stad	GOTERM_BP_ALL	GO:0043484~regulation of RNA splicing	9	1.31965	0.0324229	6733, 23210, 7072, 10921, 10922, 3185, 6429, 6207, 10658	572	109	16792	2.42394	1	0.745007	46.6922
stad	GOTERM_BP_ALL	GO:0048519~negative regulation of biological process	177	25.9531	0.0424168	7494, 51379, 6774, 6772, 6207, 8672, 23279, 23468, 11329, 6868, 889, 10921, 40, 84678, 51773, 10131, 79789, 5747, 6009, 10330, 79718, 6688, 79818, 116496, 51366, 284996, 3718, 80223, 5359, 7072, 6878, 9537, 545, 51434, 11146, 51433, 5933, 10008, 26986, 55654, 55920, 1452, 7514, 19, 7516, 8650, 7416, 81858, 8763, 5610, 10428, 8301, 23019, 7421, 2274, 5562, 54476, 286827, 7726, 80169, 23394, 101, 5…	572	4623	16792	1.12397	1	0.789489	56.2751
stad	GOTERM_BP_ALL	GO:0051347~positive regulation of transferase activity	31	4.54545	0.0477084	63967, 5310, 6464, 5686, 5610, 57515, 8797, 84962, 6868, 387, 8795, 5562, 23394, 3654, 101, 9043, 5747, 2013, 22863, 5690, 5982, 3309, 4486, 996, 2180, 5576, 51434, 51433, 4931, 10595, 896	572	640	16792	1.42196	1	0.798248	60.6633
stad	GOTERM_BP_ALL	GO:1903828~negative regulation of cellular protein localization	10	1.46628	0.0478942	56957, 5905, 64081, 2824, 5310, 598, 8650, 9516, 9528, 11124	572	139	16792	2.11199	1	0.797484	60.8096
stad	GOTERM_BP_ALL	GO:0045619~regulation of lymphocyte differentiation	10	1.46628	0.0497193	3594, 7494, 3707, 3111, 150372, 3601, 22806, 101, 6654, 3718	572	140	16792	2.0969	1	0.803766	62.2189
stad	GOTERM_BP_ALL	GO:1903018~regulation of glycoprotein metabolic process	5	0.733138	0.0535496	5074, 5861, 23394, 9528, 3718	572	42	16792	3.49484	1	0.810691	65.0218
stad	GOTERM_BP_ALL	GO:0031324~negative regulation of cellular metabolic process	94	13.783	0.0607235	165918, 7494, 6774, 6772, 140710, 7707, 6207, 5686, 10755, 84962, 23468, 11329, 10921, 5987, 84678, 94239, 84629, 51773, 10131, 55333, 10658, 10443, 5329, 56957, 5074, 9611, 302, 79718, 6310, 9208, 5690, 6311, 6688, 79818, 23369, 57591, 55269, 3718, 116496, 284996, 51366, 54962, 7072, 545, 51434, 11146, 51433, 5933, 7029, 4642, 23603, 26986, 861, 9318, 7514, 7416, 64754, 5610, 3364, 8301, 23019, …	572	2345	16792	1.17677	1	0.834572	69.7498
stad	GOTERM_BP_ALL	GO:0051897~positive regulation of protein kinase B signaling	7	1.02639	0.0662677	7494, 5747, 10855, 8904, 3092, 101, 4486	572	84	16792	2.44639	1	0.849702	72.9818
stad	GOTERM_BP_ALL	GO:0010629~negative regulation of gene expression	62	9.09091	0.0675235	165918, 7494, 6774, 7707, 6772, 6207, 23279, 23468, 84962, 5987, 10921, 84678, 94239, 84629, 84868, 51773, 9972, 10658, 10443, 56957, 5074, 9611, 10330, 79718, 6310, 9208, 6688, 79818, 55269, 23369, 7072, 5933, 7029, 26986, 861, 9318, 7514, 5610, 8301, 23019, 2274, 8904, 348995, 7421, 23394, 9528, 57459, 29934, 9631, 7014, 2734, 10848, 53615, 10499, 4999, 5814, 6670, 10644, 7323, 6429, 5433, 10595	572	1485	16792	1.22566	1	0.85068	73.667
stad	GOTERM_BP_ALL	GO:0043467~regulation of generation of precursor metabolites and energy	7	1.02639	0.0791274	9611, 6774, 84273, 957, 5562, 10580, 10131	572	88	16792	2.33519	1	0.868363	79.2651
stad	GOTERM_BP_ALL	GO:0046823~negative regulation of nucleocytoplasmic transport	6	0.879765	0.0813252	5905, 64081, 5310, 9516, 9972, 11124	572	68	16792	2.59029	1	0.867194	80.1895
stad	GOTERM_BP_ALL	GO:1903311~regulation of mRNA metabolic process	9	1.31965	0.0840572	79811, 6733, 23019, 23210, 7072, 10921, 6429, 56829, 26986	572	133	16792	1.98654	1	0.866695	81.2842
stad	GOTERM_BP_ALL	GO:0048523~negative regulation of cellular process	162	23.7537	0.0845795	7494, 51379, 6774, 6772, 6207, 8672, 23468, 11329, 6868, 889, 10921, 40, 84678, 51773, 10131, 79789, 5747, 6009, 79718, 6688, 79818, 116496, 51366, 284996, 3718, 80223, 5359, 7072, 6878, 9537, 545, 51434, 11146, 51433, 5933, 10008, 26986, 55654, 55920, 1452, 7514, 19, 7516, 8650, 7416, 8763, 5610, 10428, 8301, 23019, 7421, 2274, 5562, 286827, 7726, 80169, 23394, 101, 57158, 64081, 22863, 598, 866…	572	4300	16792	1.10599	1	0.867238	81.4869
stad	GOTERM_BP_ALL	GO:1902533~positive regulation of intracellular signal transduction	40	5.8651	0.0871093	1936, 7494, 3707, 51379, 10855, 6774, 6464, 121665, 56829, 10955, 387522, 81858, 5610, 8797, 222068, 84962, 25865, 387, 8904, 8795, 5562, 84868, 3654, 101, 57158, 9043, 5747, 388325, 6009, 598, 3094, 5175, 3092, 23369, 4486, 7052, 545, 9516, 10595, 6654	572	915	16792	1.28335	1	0.871911	82.4393
stad	GOTERM_BP_ALL	GO:0030162~regulation of proteolysis	32	4.69208	0.0899779	842, 7494, 5310, 6774, 1452, 1075, 5686, 6790, 8797, 8301, 10755, 8795, 3633, 9528, 29934, 101, 5329, 10845, 5747, 2734, 5690, 3092, 57591, 55175, 3329, 996, 718, 51434, 11146, 51433, 2537, 7531	572	708	16792	1.32685	1	0.874001	83.4631
stad	GOTERM_BP_ALL	GO:0042990~regulation of transcription factor import into nucleus	7	1.02639	0.0932876	7494, 5310, 387, 121665, 9516, 11124, 23586	572	92	16792	2.23366	1	0.874047	84.5741
stad	GOTERM_BP_ALL	GO:1904469~positive regulation of tumor necrosis factor secretion	2	0.293255	0.098589	84868, 3329	572	3	16792	19.5711	1	0.877642	86.2074
stad	GOTERM_BP_ALL	GO:0032663~regulation of interleukin-2 production	5	0.733138	0.0999643	861, 25865, 5987, 11146, 84868	572	52	16792	2.82275	1	0.879373	86.6036
thca	GOTERM_BP_ALL	GO:0036003~positive regulation of transcription from RNA polymerase II promoter in response to stress	6	0.410397	0.0284746	7494, 7422, 467, 3309, 4780, 7157	1189	25	16792	3.38947	1	0.719106	43.3568
thca	GOTERM_BP_ALL	GO:0051099~positive regulation of binding	17	1.16279	0.0388208	3673, 5310, 9618, 54552, 114609, 22933, 1965, 1025, 1499, 7189, 1203, 6789, 9709, 889, 120892, 3077, 23129	1189	140	16792	1.71491	1	0.784558	54.1163
thca	GOTERM_BP_ALL	GO:1902036~regulation of hematopoietic stem cell differentiation	3	0.205198	0.043315	4780, 5610, 10443	1189	5	16792	8.47368	1	0.810009	58.1582
thca	GOTERM_BP_ALL	GO:1990440~positive regulation of transcription from RNA polymerase II promoter in response to endoplasmic reticulum stress	4	0.273598	0.0480025	7494, 467, 3309, 7157	1189	12	16792	4.7076	1	0.83092	62.0127
thca	GOTERM_BP_ALL	GO:0032092~positive regulation of protein binding	11	0.752394	0.0551124	3673, 54552, 5310, 9618, 114609, 6789, 9709, 889, 120892, 3077, 23129	1189	80	16792	1.94188	1	0.842029	67.2221
thca	GOTERM_BP_ALL	GO:1900221~regulation of beta-amyloid clearance	3	0.205198	0.0619696	4043, 6722, 1191	1189	6	16792	7.0614	1	0.864344	71.5986
thca	GOTERM_BP_ALL	GO:1904294~positive regulation of ERAD pathway	4	0.273598	0.0715295	7494, 9709, 4287, 4780	1189	14	16792	4.03508	1	0.883745	76.783
thca	GOTERM_BP_ALL	GO:2000279~negative regulation of DNA biosynthetic process	6	0.410397	0.0802418	9104, 54552, 94, 80169, 5371, 7157	1189	33	16792	2.56778	1	0.898794	80.7139
thca	GOTERM_BP_ALL	GO:1904707~positive regulation of vascular smooth muscle cell proliferation	4	0.273598	0.0848822	4217, 7494, 657, 4193	1189	15	16792	3.76608	1	0.905046	82.5409
thca	GOTERM_BP_ALL	GO:0048385~regulation of retinoic acid receptor signaling pathway	4	0.273598	0.0992008	811, 7181, 171023, 9249	1189	16	16792	3.5307	1	0.92173	87.1985
