# Supplementary material for: Genomic Positional Dissection of RNA Editomes in Tumor and Normal Samples
Source: Front Genet. 2019 Mar 20;10:211. doi: 10.3389/fgene.2019.00211 (PMC6435843; doi:10.3389/fgene.2019.00211)
Supplement: FIGURE S1 — Histogram of shared RNA editing sites across multiple cancers filtered by four different average RNA editing level: A > 0%, B > 10%, C > 25%, D > 50%. Majority of the RNA editing sites occurs only in 1 or 2 cancers. [file Data_Sheet_1.ZIP › SupplementaryTable5.xlsx]

## Sheet: david_14cancers_pathways
Table S5. Common functional categories shared by cancers from genes with RNA editing events
Term	Cancers	Number of Cancer
GO:0008152~metabolic process	blca,brca,cesc,hnsc,kich,kirc,kirp,lihc,luad,lusc,prad,stad,thca,ucec	14
GO:0043170~macromolecule metabolic process	blca,brca,cesc,hnsc,kich,kirc,kirp,lihc,luad,lusc,prad,stad,thca,ucec	14
GO:0044444~cytoplasmic part	blca,brca,cesc,hnsc,kich,kirc,kirp,lihc,luad,lusc,prad,stad,thca,ucec	14
GO:0044446~intracellular organelle part	blca,brca,cesc,hnsc,kich,kirc,kirp,lihc,luad,lusc,prad,stad,thca,ucec	14
GO:1901564~organonitrogen compound metabolic process	blca,brca,cesc,hnsc,kich,kirc,kirp,lihc,luad,lusc,prad,stad,thca,ucec	14
GO:0003676~nucleic acid binding	blca,brca,cesc,hnsc,kich,kirc,kirp,lihc,luad,lusc,prad,stad,thca	13
GO:0003723~RNA binding	blca,brca,cesc,hnsc,kich,kirc,kirp,lihc,luad,lusc,prad,stad,thca	13
GO:0005622~intracellular	blca,brca,hnsc,kich,kirc,kirp,lihc,luad,lusc,prad,stad,thca,ucec	13
GO:0005730~nucleolus	blca,brca,hnsc,kich,kirc,kirp,lihc,luad,lusc,prad,stad,thca,ucec	13
GO:0005737~cytoplasm	blca,brca,hnsc,kich,kirc,kirp,lihc,luad,lusc,prad,stad,thca,ucec	13
GO:0006139~nucleobase-containing compound metabolic process	blca,brca,cesc,hnsc,kich,kirc,kirp,lihc,luad,lusc,prad,stad,thca	13
GO:0006412~translation	blca,brca,hnsc,kich,kirc,kirp,lihc,luad,lusc,prad,stad,thca,ucec	13
GO:0006807~nitrogen compound metabolic process	blca,brca,cesc,hnsc,kich,kirc,kirp,lihc,luad,lusc,prad,stad,thca	13
GO:0009059~macromolecule biosynthetic process	blca,brca,hnsc,kich,kirc,kirp,lihc,luad,lusc,prad,stad,thca,ucec	13
GO:0030529~intracellular ribonucleoprotein complex	blca,brca,cesc,hnsc,kich,kirc,kirp,lihc,luad,lusc,prad,stad,thca	13
GO:0031090~organelle membrane	blca,brca,hnsc,kich,kirc,kirp,lihc,luad,lusc,prad,stad,thca,ucec	13
GO:0031974~membrane-enclosed lumen	blca,brca,hnsc,kich,kirc,kirp,lihc,luad,lusc,prad,stad,thca,ucec	13
GO:0032991~macromolecular complex	blca,brca,hnsc,kich,kirc,kirp,lihc,luad,lusc,prad,stad,thca,ucec	13
GO:0033365~protein localization to organelle	blca,brca,hnsc,kich,kirc,kirp,lihc,luad,lusc,prad,stad,thca,ucec	13
GO:0034641~cellular nitrogen compound metabolic process	blca,brca,cesc,hnsc,kich,kirc,kirp,lihc,luad,lusc,prad,stad,thca	13
GO:0034645~cellular macromolecule biosynthetic process	blca,brca,hnsc,kich,kirc,kirp,lihc,luad,lusc,prad,stad,thca,ucec	13
GO:0043043~peptide biosynthetic process	blca,brca,hnsc,kich,kirc,kirp,lihc,luad,lusc,prad,stad,thca,ucec	13
GO:0043226~organelle	blca,brca,hnsc,kich,kirc,kirp,lihc,luad,lusc,prad,stad,thca,ucec	13
GO:0043227~membrane-bounded organelle	blca,brca,hnsc,kich,kirc,kirp,lihc,luad,lusc,prad,stad,thca,ucec	13
GO:0043228~non-membrane-bounded organelle	blca,brca,hnsc,kich,kirc,kirp,lihc,luad,lusc,prad,stad,thca,ucec	13
GO:0043229~intracellular organelle	blca,brca,hnsc,kich,kirc,kirp,lihc,luad,lusc,prad,stad,thca,ucec	13
GO:0043231~intracellular membrane-bounded organelle	blca,brca,hnsc,kich,kirc,kirp,lihc,luad,lusc,prad,stad,thca,ucec	13
GO:0043232~intracellular non-membrane-bounded organelle	blca,brca,hnsc,kich,kirc,kirp,lihc,luad,lusc,prad,stad,thca,ucec	13
GO:0043233~organelle lumen	blca,brca,hnsc,kich,kirc,kirp,lihc,luad,lusc,prad,stad,thca,ucec	13
GO:0043234~protein complex	blca,brca,hnsc,kich,kirc,kirp,lihc,luad,lusc,prad,stad,thca,ucec	13
GO:0044237~cellular metabolic process	blca,brca,cesc,hnsc,kich,kirc,kirp,lihc,luad,lusc,prad,stad,thca	13
GO:0044260~cellular macromolecule metabolic process	blca,brca,cesc,hnsc,kich,kirc,kirp,lihc,luad,lusc,prad,stad,thca	13
GO:0044422~organelle part	blca,brca,hnsc,kich,kirc,kirp,lihc,luad,lusc,prad,stad,thca,ucec	13
GO:0044424~intracellular part	blca,brca,hnsc,kich,kirc,kirp,lihc,luad,lusc,prad,stad,thca,ucec	13
GO:0044429~mitochondrial part	blca,brca,hnsc,kich,kirc,kirp,lihc,luad,lusc,prad,stad,thca,ucec	13
GO:0070013~intracellular organelle lumen	blca,brca,hnsc,kich,kirc,kirp,lihc,luad,lusc,prad,stad,thca,ucec	13
GO:0070727~cellular macromolecule localization	blca,brca,hnsc,kich,kirc,kirp,lihc,luad,lusc,prad,stad,thca,ucec	13
GO:0071704~organic substance metabolic process	blca,brca,cesc,hnsc,kich,kirc,kirp,lihc,luad,lusc,prad,stad,thca	13
GO:0098588~bounding membrane of organelle	blca,brca,hnsc,kich,kirc,kirp,lihc,luad,lusc,prad,stad,thca,ucec	13
GO:1902494~catalytic complex	blca,brca,hnsc,kich,kirc,kirp,lihc,luad,lusc,prad,stad,thca,ucec	13
GO:1990234~transferase complex	blca,brca,hnsc,kich,kirc,kirp,lihc,luad,lusc,prad,stad,thca,ucec	13
GO:1990904~ribonucleoprotein complex	blca,brca,cesc,hnsc,kich,kirc,kirp,lihc,luad,lusc,prad,stad,thca	13
GO:0000428~DNA-directed RNA polymerase complex	blca,brca,hnsc,kich,kirc,kirp,lihc,luad,lusc,prad,stad,thca	12
GO:0000956~nuclear-transcribed mRNA catabolic process	blca,brca,hnsc,kich,kirc,kirp,lihc,luad,lusc,prad,stad,thca	12
GO:0003824~catalytic activity	blca,brca,hnsc,kich,kirc,kirp,lihc,luad,lusc,prad,stad,thca	12
GO:0005623~cell	blca,brca,hnsc,kich,kirc,kirp,lihc,luad,lusc,prad,stad,thca	12
GO:0005634~nucleus	blca,brca,hnsc,kich,kirc,kirp,lihc,luad,lusc,prad,stad,thca	12
GO:0005654~nucleoplasm	blca,brca,hnsc,kich,kirc,kirp,lihc,luad,lusc,prad,stad,thca	12
GO:0005739~mitochondrion	blca,brca,hnsc,kich,kirc,kirp,lihc,luad,lusc,prad,stad,thca	12
GO:0005740~mitochondrial envelope	blca,brca,hnsc,kich,kirc,kirp,lihc,luad,lusc,prad,stad,thca	12
GO:0005743~mitochondrial inner membrane	blca,brca,hnsc,kich,kirc,kirp,lihc,luad,lusc,prad,stad,thca	12
GO:0005789~endoplasmic reticulum membrane	brca,hnsc,kich,kirc,kirp,lihc,luad,lusc,prad,stad,thca,ucec	12
GO:0005829~cytosol	blca,brca,hnsc,kich,kirc,kirp,lihc,luad,lusc,prad,stad,thca	12
GO:0005912~adherens junction	blca,brca,hnsc,kich,kirc,kirp,lihc,luad,lusc,prad,stad,thca	12
GO:0005913~cell-cell adherens junction	blca,brca,hnsc,kirc,kirp,lihc,luad,lusc,prad,stad,thca,ucec	12
GO:0006364~rRNA processing	blca,brca,cesc,hnsc,kich,kirc,kirp,lihc,luad,lusc,prad,thca	12
GO:0006396~RNA processing	blca,brca,hnsc,kich,kirc,kirp,lihc,luad,lusc,prad,stad,thca	12
GO:0006518~peptide metabolic process	blca,brca,hnsc,kich,kirc,kirp,lihc,luad,lusc,prad,stad,thca	12
GO:0006613~cotranslational protein targeting to membrane	blca,brca,hnsc,kich,kirc,kirp,lihc,luad,lusc,prad,thca,ucec	12
GO:0006725~cellular aromatic compound metabolic process	blca,brca,hnsc,kich,kirc,kirp,lihc,luad,lusc,prad,stad,thca	12
GO:0006886~intracellular protein transport	blca,brca,hnsc,kich,kirc,kirp,lihc,luad,lusc,prad,stad,thca	12
GO:0007034~vacuolar transport	blca,brca,hnsc,kich,kirc,kirp,lihc,luad,lusc,prad,stad,thca	12
GO:0009058~biosynthetic process	blca,brca,hnsc,kich,kirc,kirp,lihc,luad,lusc,prad,stad,thca	12
GO:0010467~gene expression	blca,brca,hnsc,kich,kirc,kirp,lihc,luad,lusc,prad,stad,thca	12
GO:0012505~endomembrane system	brca,hnsc,kich,kirc,kirp,lihc,luad,lusc,prad,stad,thca,ucec	12
GO:0015031~protein transport	blca,brca,hnsc,kich,kirc,kirp,lihc,luad,lusc,prad,stad,thca	12
GO:0016032~viral process	blca,brca,hnsc,kich,kirc,kirp,lihc,luad,lusc,prad,stad,thca	12
GO:0016070~RNA metabolic process	blca,brca,hnsc,kich,kirc,kirp,lihc,luad,lusc,prad,stad,thca	12
GO:0016072~rRNA metabolic process	blca,brca,cesc,hnsc,kich,kirc,kirp,lihc,luad,lusc,prad,thca	12
GO:0016197~endosomal transport	blca,brca,hnsc,kich,kirc,kirp,lihc,luad,lusc,prad,stad,thca	12
GO:0016482~cytosolic transport	blca,brca,hnsc,kich,kirc,kirp,lihc,luad,lusc,prad,stad,thca	12
GO:0019058~viral life cycle	blca,brca,hnsc,kich,kirc,kirp,lihc,luad,lusc,prad,stad,thca	12
GO:0019080~viral gene expression	blca,brca,hnsc,kich,kirc,kirp,lihc,luad,lusc,prad,stad,thca	12
GO:0019083~viral transcription	blca,brca,hnsc,kich,kirc,kirp,lihc,luad,lusc,prad,stad,thca	12
GO:0019439~aromatic compound catabolic process	blca,brca,hnsc,kich,kirc,kirp,lihc,luad,lusc,prad,stad,thca	12
GO:0019866~organelle inner membrane	blca,brca,hnsc,kich,kirc,kirp,lihc,luad,lusc,prad,stad,thca	12
GO:0022613~ribonucleoprotein complex biogenesis	blca,brca,hnsc,kich,kirc,kirp,lihc,luad,lusc,prad,stad,thca	12
GO:0030880~RNA polymerase complex	blca,brca,hnsc,kich,kirc,kirp,lihc,luad,lusc,prad,stad,thca	12
GO:0031966~mitochondrial membrane	blca,brca,hnsc,kich,kirc,kirp,lihc,luad,lusc,prad,stad,thca	12
GO:0031967~organelle envelope	blca,brca,hnsc,kich,kirc,kirp,lihc,luad,lusc,prad,stad,thca	12
GO:0031975~envelope	blca,brca,hnsc,kich,kirc,kirp,lihc,luad,lusc,prad,stad,thca	12
GO:0031981~nuclear lumen	blca,brca,hnsc,kich,kirc,kirp,lihc,luad,lusc,prad,stad,thca	12
GO:0031982~vesicle	blca,brca,hnsc,kich,kirc,kirp,lihc,luad,lusc,prad,stad,thca	12
GO:0034470~ncRNA processing	blca,brca,hnsc,kich,kirc,kirp,lihc,luad,lusc,prad,stad,thca	12
GO:0034655~nucleobase-containing compound catabolic process	blca,brca,hnsc,kich,kirc,kirp,lihc,luad,lusc,prad,stad,thca	12
GO:0034660~ncRNA metabolic process	blca,brca,hnsc,kich,kirc,kirp,lihc,luad,lusc,prad,stad,thca	12
GO:0042254~ribosome biogenesis	blca,brca,cesc,hnsc,kich,kirc,kirp,lihc,luad,lusc,prad,thca	12
GO:0043230~extracellular organelle	blca,brca,hnsc,kich,kirc,kirp,lihc,luad,lusc,prad,stad,thca	12
GO:0043603~cellular amide metabolic process	blca,brca,hnsc,kich,kirc,kirp,lihc,luad,lusc,prad,stad,thca	12
GO:0043604~amide biosynthetic process	blca,brca,hnsc,kich,kirc,kirp,lihc,luad,lusc,prad,stad,thca	12
GO:0044033~multi-organism metabolic process	blca,brca,hnsc,kich,kirc,kirp,lihc,luad,lusc,prad,stad,thca	12
GO:0044238~primary metabolic process	blca,brca,hnsc,kich,kirc,kirp,lihc,luad,lusc,prad,stad,thca	12
GO:0044248~cellular catabolic process	blca,brca,hnsc,kich,kirc,kirp,lihc,luad,lusc,prad,stad,thca	12
GO:0044249~cellular biosynthetic process	blca,brca,hnsc,kich,kirc,kirp,lihc,luad,lusc,prad,stad,thca	12
GO:0044270~cellular nitrogen compound catabolic process	blca,brca,hnsc,kich,kirc,kirp,lihc,luad,lusc,prad,stad,thca	12
GO:0044271~cellular nitrogen compound biosynthetic process	blca,brca,hnsc,kich,kirc,kirp,lihc,luad,lusc,prad,stad,thca	12
GO:0044403~symbiosis, encompassing mutualism through parasitism	blca,brca,hnsc,kich,kirc,kirp,lihc,luad,lusc,prad,stad,thca	12
GO:0044419~interspecies interaction between organisms	blca,brca,hnsc,kich,kirc,kirp,lihc,luad,lusc,prad,stad,thca	12
GO:0044428~nuclear part	blca,brca,hnsc,kich,kirc,kirp,lihc,luad,lusc,prad,stad,thca	12
GO:0044432~endoplasmic reticulum part	brca,hnsc,kich,kirc,kirp,lihc,luad,lusc,prad,stad,thca,ucec	12
GO:0044437~vacuolar part	blca,brca,hnsc,kich,kirc,kirp,luad,lusc,prad,stad,thca,ucec	12
GO:0044464~cell part	blca,brca,hnsc,kich,kirc,kirp,lihc,luad,lusc,prad,stad,thca	12
GO:0044764~multi-organism cellular process	blca,brca,hnsc,kich,kirc,kirp,lihc,luad,lusc,prad,stad,thca	12
GO:0044822~poly(A) RNA binding	blca,brca,hnsc,kich,kirc,kirp,lihc,luad,lusc,prad,stad,thca	12
GO:0045296~cadherin binding	blca,brca,hnsc,kirc,kirp,lihc,luad,lusc,prad,stad,thca,ucec	12
GO:0046483~heterocycle metabolic process	blca,brca,hnsc,kich,kirc,kirp,lihc,luad,lusc,prad,stad,thca	12
GO:0046700~heterocycle catabolic process	blca,brca,hnsc,kich,kirc,kirp,lihc,luad,lusc,prad,stad,thca	12
GO:0046907~intracellular transport	blca,brca,hnsc,kich,kirc,kirp,lihc,luad,lusc,prad,stad,thca	12
GO:0051649~establishment of localization in cell	blca,brca,hnsc,kich,kirc,kirp,lihc,luad,lusc,prad,stad,thca	12
GO:0055029~nuclear DNA-directed RNA polymerase complex	blca,brca,hnsc,kich,kirc,kirp,lihc,luad,lusc,prad,stad,thca	12
GO:0061695~transferase complex, transferring phosphorus-containing groups	blca,brca,hnsc,kich,kirc,kirp,lihc,luad,lusc,prad,stad,thca	12
GO:0070161~anchoring junction	blca,brca,hnsc,kich,kirc,kirp,lihc,luad,lusc,prad,stad,thca	12
GO:0090304~nucleic acid metabolic process	blca,brca,hnsc,kich,kirc,kirp,lihc,luad,lusc,prad,stad,thca	12
GO:0097159~organic cyclic compound binding	blca,brca,hnsc,kich,kirc,kirp,lihc,luad,lusc,prad,stad,thca	12
GO:0098631~protein binding involved in cell adhesion	blca,brca,hnsc,kirc,kirp,lihc,luad,lusc,prad,stad,thca,ucec	12
GO:0098632~protein binding involved in cell-cell adhesion	blca,brca,hnsc,kirc,kirp,lihc,luad,lusc,prad,stad,thca,ucec	12
GO:0098641~cadherin binding involved in cell-cell adhesion	blca,brca,hnsc,kirc,kirp,lihc,luad,lusc,prad,stad,thca,ucec	12
GO:0098805~whole membrane	blca,brca,hnsc,kich,kirc,kirp,luad,lusc,prad,stad,thca,ucec	12
GO:1901360~organic cyclic compound metabolic process	blca,brca,hnsc,kich,kirc,kirp,lihc,luad,lusc,prad,stad,thca	12
GO:1901363~heterocyclic compound binding	blca,brca,hnsc,kich,kirc,kirp,lihc,luad,lusc,prad,stad,thca	12
GO:1901566~organonitrogen compound biosynthetic process	blca,brca,hnsc,kich,kirc,kirp,lihc,luad,lusc,prad,stad,thca	12
GO:1901575~organic substance catabolic process	blca,brca,hnsc,kich,kirc,kirp,lihc,luad,lusc,prad,stad,thca	12
GO:1901576~organic substance biosynthetic process	blca,brca,hnsc,kich,kirc,kirp,lihc,luad,lusc,prad,stad,thca	12
GO:1902582~single-organism intracellular transport	blca,brca,hnsc,kich,kirc,kirp,lihc,luad,lusc,prad,stad,thca	12
GO:1903561~extracellular vesicle	blca,brca,hnsc,kich,kirc,kirp,lihc,luad,lusc,prad,stad,thca	12
GO:0000184~nuclear-transcribed mRNA catabolic process, nonsense-mediated decay	blca,brca,hnsc,kich,kirc,kirp,lihc,luad,lusc,prad,thca	11
GO:0003735~structural constituent of ribosome	blca,brca,hnsc,kich,kirc,kirp,lihc,luad,lusc,prad,thca	11
GO:0003899~DNA-directed RNA polymerase activity	blca,brca,hnsc,kich,kirc,kirp,lihc,luad,lusc,stad,thca	11
GO:0005759~mitochondrial matrix	blca,brca,hnsc,kich,kirc,kirp,lihc,luad,lusc,prad,thca	11
GO:0005773~vacuole	blca,brca,hnsc,kich,kirc,kirp,luad,lusc,prad,stad,thca	11
GO:0005775~vacuolar lumen	blca,brca,hnsc,kich,kirc,kirp,luad,lusc,prad,stad,thca	11
GO:0005840~ribosome	blca,brca,hnsc,kich,kirc,kirp,lihc,luad,lusc,prad,thca	11
GO:0005911~cell-cell junction	blca,brca,hnsc,kirc,lihc,luad,lusc,prad,stad,thca,ucec	11
GO:0005924~cell-substrate adherens junction	blca,brca,hnsc,kich,kirc,kirp,luad,lusc,prad,stad,thca	11
GO:0005925~focal adhesion	blca,brca,hnsc,kich,kirc,kirp,luad,lusc,prad,stad,thca	11
GO:0006402~mRNA catabolic process	blca,brca,hnsc,kich,kirc,kirp,luad,lusc,prad,stad,thca	11
GO:0006413~translational initiation	blca,brca,hnsc,kich,kirc,kirp,lihc,luad,lusc,prad,thca	11
GO:0006414~translational elongation	blca,brca,hnsc,kich,kirc,kirp,lihc,luad,lusc,prad,thca	11
GO:0006605~protein targeting	blca,brca,hnsc,kirc,kirp,lihc,luad,lusc,prad,stad,thca	11
GO:0006612~protein targeting to membrane	blca,brca,hnsc,kich,kirc,kirp,lihc,luad,lusc,prad,thca	11
GO:0006614~SRP-dependent cotranslational protein targeting to membrane	blca,brca,hnsc,kich,kirc,kirp,lihc,luad,lusc,prad,thca	11
GO:0007005~mitochondrion organization	blca,brca,hnsc,kich,kirc,kirp,lihc,luad,lusc,prad,thca	11
GO:0008104~protein localization	blca,brca,hnsc,kirc,kirp,lihc,luad,lusc,prad,stad,thca	11
GO:0015934~large ribosomal subunit	blca,brca,hnsc,kich,kirc,kirp,lihc,luad,lusc,prad,thca	11
GO:0015935~small ribosomal subunit	blca,brca,hnsc,kich,kirc,kirp,lihc,luad,lusc,prad,thca	11
GO:0016591~DNA-directed RNA polymerase II, holoenzyme	blca,brca,hnsc,kirc,kirp,lihc,luad,lusc,prad,stad,thca	11
GO:0016740~transferase activity	blca,brca,hnsc,kich,kirc,kirp,lihc,luad,prad,stad,thca	11
GO:0016779~nucleotidyltransferase activity	blca,brca,hnsc,kich,kirc,kirp,lihc,luad,lusc,stad,thca	11
GO:0018130~heterocycle biosynthetic process	blca,brca,kich,kirc,kirp,lihc,luad,lusc,prad,stad,thca	11
GO:0019438~aromatic compound biosynthetic process	blca,brca,kich,kirc,kirp,lihc,luad,lusc,prad,stad,thca	11
GO:0022625~cytosolic large ribosomal subunit	blca,brca,hnsc,kich,kirc,kirp,lihc,luad,lusc,prad,thca	11
GO:0022626~cytosolic ribosome	blca,brca,hnsc,kich,kirc,kirp,lihc,luad,lusc,prad,thca	11
GO:0030055~cell-substrate junction	blca,brca,hnsc,kich,kirc,kirp,luad,lusc,prad,stad,thca	11
GO:0031988~membrane-bounded vesicle	brca,hnsc,kich,kirc,kirp,lihc,luad,lusc,prad,stad,thca	11
GO:0032543~mitochondrial translation	blca,brca,hnsc,kich,kirc,kirp,lihc,luad,lusc,prad,thca	11
GO:0033036~macromolecule localization	blca,brca,kich,kirc,kirp,lihc,luad,lusc,prad,stad,thca	11
GO:0034062~RNA polymerase activity	blca,brca,hnsc,kich,kirc,kirp,lihc,luad,lusc,stad,thca	11
GO:0034613~cellular protein localization	blca,brca,hnsc,kich,kirc,kirp,luad,lusc,prad,stad,thca	11
GO:0042175~nuclear outer membrane-endoplasmic reticulum membrane network	brca,hnsc,kich,kirc,kirp,lihc,luad,lusc,prad,stad,thca	11
GO:0043122~regulation of I-kappaB kinase/NF-kappaB signaling	blca,brca,hnsc,kich,kirc,kirp,lihc,luad,lusc,prad,stad	11
GO:0043123~positive regulation of I-kappaB kinase/NF-kappaB signaling	brca,hnsc,kich,kirc,kirp,lihc,luad,lusc,prad,stad,thca	11
GO:0043202~lysosomal lumen	blca,brca,hnsc,kich,kirc,kirp,luad,lusc,prad,stad,thca	11
GO:0044391~ribosomal subunit	blca,brca,hnsc,kich,kirc,kirp,lihc,luad,lusc,prad,thca	11
GO:0044431~Golgi apparatus part	brca,hnsc,kich,kirc,kirp,luad,lusc,prad,stad,thca,ucec	11
GO:0044445~cytosolic part	blca,brca,hnsc,kich,kirc,kirp,lihc,luad,lusc,prad,thca	11
GO:0045047~protein targeting to ER	blca,brca,hnsc,kich,kirc,kirp,lihc,luad,lusc,prad,thca	11
GO:0045184~establishment of protein localization	blca,brca,hnsc,kirc,kirp,lihc,luad,lusc,prad,stad,thca	11
GO:0050792~regulation of viral process	blca,brca,hnsc,kirc,kirp,lihc,luad,lusc,prad,stad,thca	11
GO:0051641~cellular localization	blca,brca,hnsc,kich,kirc,kirp,luad,lusc,prad,stad,thca	11
GO:0070062~extracellular exosome	brca,hnsc,kich,kirc,kirp,lihc,luad,lusc,prad,stad,thca	11
GO:0070972~protein localization to endoplasmic reticulum	blca,brca,hnsc,kich,kirc,kirp,lihc,luad,lusc,prad,thca	11
GO:0071702~organic substance transport	blca,brca,kich,kirc,kirp,lihc,luad,lusc,prad,stad,thca	11
GO:0072599~establishment of protein localization to endoplasmic reticulum	blca,brca,hnsc,kich,kirc,kirp,lihc,luad,lusc,prad,thca	11
GO:0097194~execution phase of apoptosis	blca,brca,hnsc,kich,kirc,lihc,luad,lusc,prad,stad,thca	11
GO:1901361~organic cyclic compound catabolic process	blca,brca,hnsc,kich,kirc,lihc,luad,lusc,prad,stad,thca	11
GO:0000323~lytic vacuole	brca,hnsc,kich,kirc,kirp,luad,lusc,prad,stad,thca	10
GO:0003697~single-stranded DNA binding	blca,brca,hnsc,kich,kirc,kirp,lihc,luad,lusc,stad	10
GO:0005488~binding	blca,brca,hnsc,kich,kirc,lihc,luad,prad,stad,thca	10
GO:0005657~replication fork	blca,brca,hnsc,kich,kirc,kirp,lihc,luad,lusc,thca	10
GO:0005669~transcription factor TFIID complex	blca,brca,hnsc,kich,kirc,kirp,luad,lusc,prad,thca	10
GO:0005764~lysosome	brca,hnsc,kich,kirc,kirp,luad,lusc,prad,stad,thca	10
GO:0005774~vacuolar membrane	brca,hnsc,kich,kirc,kirp,luad,lusc,stad,thca,ucec	10
GO:0005783~endoplasmic reticulum	hnsc,kich,kirc,kirp,lihc,luad,prad,stad,thca,ucec	10
GO:0005793~endoplasmic reticulum-Golgi intermediate compartment	brca,hnsc,kich,kirc,kirp,lihc,luad,lusc,stad,thca	10
GO:0006040~amino sugar metabolic process	blca,brca,hnsc,kich,kirp,lihc,luad,lusc,stad,thca	10
GO:0006259~DNA metabolic process	blca,brca,hnsc,kich,kirc,kirp,lihc,luad,lusc,thca	10
GO:0006401~RNA catabolic process	blca,brca,hnsc,kich,kirc,luad,lusc,prad,stad,thca	10
GO:0006487~protein N-linked glycosylation	brca,hnsc,kich,kirc,kirp,lihc,luad,lusc,prad,thca	10
GO:0006520~cellular amino acid metabolic process	blca,brca,hnsc,kich,kirc,kirp,lihc,luad,prad,thca	10
GO:0007030~Golgi organization	blca,brca,hnsc,kich,kirc,kirp,luad,lusc,prad,thca	10
GO:0007249~I-kappaB kinase/NF-kappaB signaling	brca,hnsc,kich,kirc,kirp,lihc,luad,lusc,prad,stad	10
GO:0009301~snRNA transcription	blca,brca,hnsc,kich,kirc,kirp,lihc,luad,lusc,thca	10
GO:0009451~RNA modification	brca,hnsc,kich,kirc,kirp,lihc,luad,prad,stad,thca	10
GO:0010212~response to ionizing radiation	blca,brca,hnsc,kich,kirc,kirp,lihc,luad,lusc,stad	10
GO:0016071~mRNA metabolic process	blca,brca,hnsc,kich,kirc,lihc,luad,lusc,prad,thca	10
GO:0016073~snRNA metabolic process	blca,brca,hnsc,kich,kirc,kirp,lihc,luad,lusc,thca	10
GO:0031304~intrinsic component of mitochondrial inner membrane	blca,brca,kich,kirc,kirp,lihc,luad,lusc,prad,thca	10
GO:0031305~integral component of mitochondrial inner membrane	blca,brca,kich,kirc,kirp,lihc,luad,lusc,prad,thca	10
GO:0032592~integral component of mitochondrial membrane	blca,brca,kich,kirc,kirp,lihc,luad,lusc,prad,thca	10
GO:0034654~nucleobase-containing compound biosynthetic process	blca,brca,kirc,kirp,lihc,luad,lusc,prad,stad,thca	10
GO:0042795~snRNA transcription from RNA polymerase II promoter	blca,brca,hnsc,kich,kirc,kirp,lihc,luad,lusc,thca	10
GO:0043903~regulation of symbiosis, encompassing mutualism through parasitism	brca,hnsc,kirc,kirp,lihc,luad,lusc,prad,stad,thca	10
GO:0044085~cellular component biogenesis	blca,brca,hnsc,kich,kirc,kirp,luad,lusc,prad,thca	10
GO:0044451~nucleoplasm part	blca,brca,hnsc,kirc,kirp,lihc,luad,lusc,prad,thca	10
GO:0051607~defense response to virus	blca,brca,hnsc,kich,kirc,kirp,lihc,luad,lusc,prad	10
GO:0071826~ribonucleoprotein complex subunit organization	blca,brca,hnsc,kich,kirc,kirp,lihc,luad,lusc,thca	10
GO:0090150~establishment of protein localization to membrane	blca,brca,hnsc,kirc,kirp,luad,lusc,prad,stad,thca	10
GO:0098573~intrinsic component of mitochondrial membrane	blca,brca,kich,kirc,kirp,lihc,luad,lusc,prad,thca	10
GO:0098781~ncRNA transcription	blca,brca,hnsc,kich,kirc,kirp,lihc,luad,lusc,thca	10
GO:1901796~regulation of signal transduction by p53 class mediator	blca,brca,hnsc,kich,kirp,lihc,luad,lusc,stad,thca	10
GO:1903900~regulation of viral life cycle	brca,hnsc,kirc,kirp,lihc,luad,lusc,prad,stad,thca	10
GO:0000082~G1/S transition of mitotic cell cycle	blca,brca,hnsc,kich,kirc,lihc,luad,lusc,stad	9
GO:0000139~Golgi membrane	brca,hnsc,kich,kirc,kirp,luad,lusc,prad,stad	9
GO:0005515~protein binding	blca,brca,hnsc,kirc,lihc,luad,lusc,stad,thca	9
GO:0005765~lysosomal membrane	brca,hnsc,kich,kirc,kirp,luad,lusc,stad,thca	9
GO:0005768~endosome	blca,brca,hnsc,kirc,kirp,luad,lusc,stad,thca	9
GO:0005777~peroxisome	blca,kich,kirp,lihc,luad,lusc,prad,stad,ucec	9
GO:0005778~peroxisomal membrane	blca,kich,kirp,lihc,luad,lusc,prad,thca,ucec	9
GO:0005794~Golgi apparatus	brca,kich,kirc,kirp,luad,lusc,stad,thca,ucec	9
GO:0005801~cis-Golgi network	blca,brca,kich,kirc,kirp,luad,lusc,prad,thca	9
GO:0006260~DNA replication	blca,brca,hnsc,kirc,kirp,lihc,luad,lusc,stad	9
GO:0006281~DNA repair	blca,brca,hnsc,kirc,kirp,lihc,luad,lusc,thca	9
GO:0006399~tRNA metabolic process	blca,brca,hnsc,kich,kirc,kirp,lihc,luad,stad	9
GO:0006457~protein folding	brca,hnsc,kich,kirc,kirp,lihc,luad,prad,thca	9
GO:0006643~membrane lipid metabolic process	brca,hnsc,kich,kirc,kirp,luad,lusc,stad,thca	9
GO:0006996~organelle organization	blca,brca,hnsc,kirc,luad,lusc,prad,stad,thca	9
GO:0009057~macromolecule catabolic process	blca,brca,hnsc,kirc,luad,lusc,prad,stad,thca	9
GO:0009083~branched-chain amino acid catabolic process	brca,hnsc,kich,kirc,kirp,lihc,luad,prad,thca	9
GO:0010508~positive regulation of autophagy	blca,brca,kirc,luad,lusc,prad,stad,thca,ucec	9
GO:0022618~ribonucleoprotein complex assembly	blca,brca,hnsc,kich,kirc,kirp,lihc,luad,thca	9
GO:0031312~extrinsic component of organelle membrane	brca,hnsc,kich,kirc,kirp,luad,lusc,stad,thca	9
GO:0031903~microbody membrane	blca,kich,kirp,lihc,luad,lusc,prad,thca,ucec	9
GO:0032479~regulation of type I interferon production	brca,hnsc,kich,kirc,kirp,lihc,luad,prad,thca	9
GO:0032606~type I interferon production	brca,hnsc,kich,kirc,kirp,lihc,luad,prad,thca	9
GO:0042579~microbody	blca,kich,kirp,lihc,luad,lusc,prad,stad,ucec	9
GO:0043167~ion binding	blca,brca,kich,kirc,lihc,luad,prad,stad,thca	9
GO:0043596~nuclear replication fork	brca,hnsc,kich,kirc,kirp,lihc,luad,lusc,thca	9
GO:0044265~cellular macromolecule catabolic process	blca,brca,hnsc,kirc,luad,lusc,prad,stad,thca	9
GO:0044440~endosomal part	brca,hnsc,kich,kirc,kirp,luad,lusc,prad,thca	9
GO:0044455~mitochondrial membrane part	blca,kich,kirc,kirp,lihc,luad,lusc,prad,thca	9
GO:0044802~single-organism membrane organization	blca,brca,hnsc,kirc,kirp,luad,lusc,prad,thca	9
GO:0046872~metal ion binding	blca,brca,kich,kirc,lihc,luad,prad,stad,thca	9
GO:0051053~negative regulation of DNA metabolic process	blca,brca,hnsc,kirc,kirp,lihc,lusc,prad,stad	9
GO:0061024~membrane organization	blca,brca,hnsc,kirc,kirp,luad,lusc,prad,thca	9
GO:0072594~establishment of protein localization to organelle	blca,brca,hnsc,kirc,lihc,luad,lusc,prad,thca	9
GO:0098852~lytic vacuole membrane	brca,hnsc,kich,kirc,kirp,luad,lusc,stad,thca	9
GO:1902580~single-organism cellular localization	blca,brca,hnsc,kirc,kirp,luad,lusc,prad,thca	9
GO:0000166~nucleotide binding	brca,hnsc,kirc,kirp,luad,prad,stad,thca	8
GO:0000776~kinetochore	blca,brca,hnsc,kirc,lihc,luad,lusc,stad	8
GO:0001731~formation of translation preinitiation complex	brca,hnsc,kich,kirc,lihc,luad,prad,thca	8
GO:0005484~SNAP receptor activity	brca,hnsc,kirc,kirp,lihc,luad,lusc,thca	8
GO:0005694~chromosome	blca,brca,hnsc,lihc,luad,lusc,stad,thca	8
GO:0005802~trans-Golgi network	brca,hnsc,kirc,kirp,luad,lusc,prad,thca	8
GO:0006082~organic acid metabolic process	brca,kich,kirc,kirp,lihc,luad,prad,stad	8
GO:0006270~DNA replication initiation	blca,brca,hnsc,kirp,lihc,luad,lusc,thca	8
GO:0006283~transcription-coupled nucleotide-excision repair	blca,hnsc,kirc,kirp,lihc,luad,lusc,thca	8
GO:0006665~sphingolipid metabolic process	brca,hnsc,kich,kirc,kirp,luad,lusc,thca	8
GO:0006790~sulfur compound metabolic process	brca,kich,kirc,kirp,luad,lusc,prad,thca	8
GO:0006891~intra-Golgi vesicle-mediated transport	blca,brca,kich,kirc,kirp,luad,lusc,prad	8
GO:0006921~cellular component disassembly involved in execution phase of apoptosis	blca,brca,hnsc,kirc,lihc,luad,lusc,stad	8
GO:0006997~nucleus organization	blca,brca,hnsc,kirc,kirp,luad,prad,thca	8
GO:0007089~traversing start control point of mitotic cell cycle	blca,brca,hnsc,kirc,kirp,lihc,luad,thca	8
GO:0008033~tRNA processing	brca,hnsc,kich,kirc,kirp,lihc,luad,stad	8
GO:0008135~translation factor activity, RNA binding	brca,hnsc,kich,kirc,kirp,luad,prad,thca	8
GO:0009056~catabolic process	brca,hnsc,kirc,kirp,lihc,luad,stad,thca	8
GO:0009081~branched-chain amino acid metabolic process	brca,hnsc,kich,kirc,kirp,lihc,prad,thca	8
GO:0009116~nucleoside metabolic process	blca,kich,kirc,kirp,lihc,luad,lusc,prad	8
GO:0009119~ribonucleoside metabolic process	blca,kich,kirc,kirp,lihc,luad,lusc,prad	8
GO:0009225~nucleotide-sugar metabolic process	brca,hnsc,kich,kirp,lihc,luad,lusc,prad	8
GO:0010256~endomembrane system organization	blca,brca,hnsc,kirc,kirp,luad,prad,thca	8
GO:0016853~isomerase activity	blca,brca,hnsc,kich,kirc,kirp,luad,thca	8
GO:0017111~nucleoside-triphosphatase activity	hnsc,kich,kirc,kirp,lihc,luad,lusc,thca	8
GO:0019752~carboxylic acid metabolic process	brca,kich,kirc,kirp,lihc,luad,prad,stad	8
GO:0032648~regulation of interferon-beta production	brca,hnsc,kich,kirc,kirp,luad,prad,thca	8
GO:0032774~RNA biosynthetic process	blca,brca,kirc,lihc,luad,prad,stad,thca	8
GO:0042147~retrograde transport, endosome to Golgi	hnsc,kirc,kirp,lihc,luad,lusc,prad,thca	8
GO:0043436~oxoacid metabolic process	brca,kich,kirc,kirp,lihc,luad,prad,stad	8
GO:0044267~cellular protein metabolic process	blca,brca,hnsc,kirc,kirp,luad,stad,thca	8
GO:0044772~mitotic cell cycle phase transition	blca,brca,hnsc,kirc,lihc,luad,lusc,stad	8
GO:0045069~regulation of viral genome replication	brca,hnsc,kirc,kirp,lihc,luad,lusc,prad	8
GO:0048193~Golgi vesicle transport	brca,kich,kirc,kirp,luad,lusc,stad,thca	8
GO:0050688~regulation of defense response to virus	blca,brca,hnsc,kirc,kirp,luad,stad,thca	8
GO:0050839~cell adhesion molecule binding	blca,brca,hnsc,kirc,luad,lusc,stad,thca	8
GO:0051701~interaction with host	brca,hnsc,kirc,kirp,luad,prad,stad,thca	8
GO:0070125~mitochondrial translational elongation	blca,brca,hnsc,kirc,kirp,luad,prad,thca	8
GO:0070126~mitochondrial translational termination	blca,brca,hnsc,kirc,kirp,luad,prad,thca	8
GO:0070987~error-free translesion synthesis	blca,brca,hnsc,kirp,lihc,luad,lusc,thca	8
GO:0071897~DNA biosynthetic process	blca,brca,hnsc,kirc,lihc,luad,lusc,thca	8
GO:0072657~protein localization to membrane	blca,brca,hnsc,kirc,kirp,luad,lusc,thca	8
GO:0090399~replicative senescence	blca,brca,kirc,kirp,luad,lusc,prad,thca	8
GO:1901265~nucleoside phosphate binding	brca,hnsc,kirc,kirp,luad,prad,stad,thca	8
GO:1901362~organic cyclic compound biosynthetic process	blca,brca,kirc,lihc,luad,prad,stad,thca	8
GO:1901565~organonitrogen compound catabolic process	brca,hnsc,kich,kirc,kirp,lihc,prad,thca	8
GO:1901657~glycosyl compound metabolic process	blca,kich,kirc,kirp,lihc,luad,lusc,prad	8
GO:0000314~organellar small ribosomal subunit	brca,hnsc,kirc,kirp,lusc,prad,thca	7
GO:0000722~telomere maintenance via recombination	brca,hnsc,kirc,lihc,luad,lusc,thca	7
GO:0000725~recombinational repair	blca,brca,hnsc,lihc,luad,lusc,thca	7
GO:0000811~GINS complex	blca,brca,hnsc,kirp,lihc,luad,lusc	7
GO:0000932~cytoplasmic mRNA processing body	brca,hnsc,kirc,kirp,lihc,luad,thca	7
GO:0001832~blastocyst growth	blca,brca,hnsc,kirp,lihc,luad,lusc	7
GO:0001833~inner cell mass cell proliferation	blca,brca,hnsc,kirp,lihc,luad,lusc	7
GO:0002753~cytoplasmic pattern recognition receptor signaling pathway	brca,hnsc,kich,kirc,kirp,luad,lusc	7
GO:0002831~regulation of response to biotic stimulus	blca,hnsc,kirc,kirp,luad,stad,thca	7
GO:0003677~DNA binding	blca,brca,kich,lihc,luad,stad,thca	7
GO:0004176~ATP-dependent peptidase activity	brca,hnsc,kich,kirc,lihc,luad,thca	7
GO:0005763~mitochondrial small ribosomal subunit	brca,hnsc,kirc,kirp,lusc,prad,thca	7
GO:0006047~UDP-N-acetylglucosamine metabolic process	blca,hnsc,kich,kirp,lihc,lusc,thca	7
GO:0006289~nucleotide-excision repair	brca,hnsc,kirc,kirp,luad,lusc,thca	7
GO:0006312~mitotic recombination	blca,brca,hnsc,lihc,luad,lusc,stad	7
GO:0006351~transcription, DNA-templated	blca,brca,kirc,lihc,luad,stad,thca	7
GO:0006415~translational termination	blca,brca,hnsc,kirc,luad,prad,thca	7
GO:0006974~cellular response to DNA damage stimulus	blca,brca,hnsc,kirc,luad,lusc,thca	7
GO:0006998~nuclear envelope organization	blca,brca,hnsc,kich,kirc,prad,thca	7
GO:0009108~coenzyme biosynthetic process	brca,kich,kirc,kirp,luad,prad,thca	7
GO:0009161~ribonucleoside monophosphate metabolic process	blca,kich,kirc,kirp,lihc,luad,prad	7
GO:0010008~endosome membrane	brca,hnsc,kirc,kirp,luad,lusc,thca	7
GO:0010468~regulation of gene expression	blca,brca,kirc,lihc,luad,stad,thca	7
GO:0010528~regulation of transposition	brca,hnsc,kirc,kirp,lihc,luad,prad	7
GO:0010529~negative regulation of transposition	brca,hnsc,kirc,kirp,lihc,luad,prad	7
GO:0010884~positive regulation of lipid storage	brca,kich,kirc,kirp,lihc,luad,lusc	7
GO:0016627~oxidoreductase activity, acting on the CH-CH group of donors	brca,kich,kirc,kirp,lihc,luad,prad	7
GO:0016818~hydrolase activity, acting on acid anhydrides, in phosphorus-containing anhydrides	hnsc,kirc,kirp,lihc,luad,lusc,thca	7
GO:0017076~purine nucleotide binding	brca,hnsc,kirc,kirp,luad,prad,stad	7
GO:0019079~viral genome replication	brca,hnsc,kirc,lihc,luad,lusc,prad	7
GO:0019395~fatty acid oxidation	brca,kich,kirc,kirp,lihc,luad,prad	7
GO:0019538~protein metabolic process	blca,brca,hnsc,kirc,luad,stad,thca	7
GO:0019899~enzyme binding	brca,hnsc,kirc,luad,stad,thca,ucec	7
GO:0022627~cytosolic small ribosomal subunit	blca,brca,kirc,luad,lusc,prad,thca	7
GO:0030027~lamellipodium	brca,kirc,kirp,luad,lusc,prad,stad	7
GO:0030054~cell junction	blca,brca,hnsc,kirc,luad,prad,stad	7
GO:0030490~maturation of SSU-rRNA	blca,hnsc,kich,kirp,lihc,lusc,prad	7
GO:0031252~cell leading edge	brca,kirc,kirp,luad,lusc,prad,stad	7
GO:0031300~intrinsic component of organelle membrane	blca,kich,kirp,lihc,luad,lusc,thca	7
GO:0031410~cytoplasmic vesicle	kich,kirc,kirp,luad,lusc,stad,thca	7
GO:0031647~regulation of protein stability	brca,hnsc,kirc,kirp,luad,lusc,thca	7
GO:0032508~DNA duplex unwinding	blca,brca,hnsc,kirp,lihc,lusc,thca	7
GO:0032553~ribonucleotide binding	brca,hnsc,kirc,kirp,luad,prad,stad	7
GO:0032555~purine ribonucleotide binding	brca,hnsc,kirc,kirp,luad,prad,stad	7
GO:0032588~trans-Golgi network membrane	brca,hnsc,kirc,kirp,luad,lusc,prad	7
GO:0034440~lipid oxidation	brca,kich,kirc,kirp,lihc,luad,prad	7
GO:0036094~small molecule binding	brca,hnsc,kirc,kirp,luad,prad,stad	7
GO:0039529~RIG-I signaling pathway	blca,brca,hnsc,kirc,kirp,luad,stad	7
GO:0044272~sulfur compound biosynthetic process	brca,kich,kirc,kirp,luad,lusc,thca	7
GO:0044281~small molecule metabolic process	brca,kich,kirc,kirp,lihc,luad,prad	7
GO:0044427~chromosomal part	blca,brca,hnsc,luad,lusc,stad,thca	7
GO:0044438~microbody part	blca,kich,kirp,lihc,luad,prad,ucec	7
GO:0044439~peroxisomal part	blca,kich,kirp,lihc,luad,prad,ucec	7
GO:0044770~cell cycle phase transition	blca,brca,hnsc,kirc,luad,lusc,stad	7
GO:0044843~cell cycle G1/S phase transition	blca,brca,hnsc,kirc,lihc,luad,lusc	7
GO:0048037~cofactor binding	brca,kirc,kirp,lihc,luad,prad,thca	7
GO:0048524~positive regulation of viral process	brca,hnsc,kirc,lihc,luad,stad,thca	7
GO:0051052~regulation of DNA metabolic process	brca,hnsc,kirc,lihc,luad,lusc,stad	7
GO:0051082~unfolded protein binding	brca,kich,kirc,kirp,lihc,luad,thca	7
GO:0051186~cofactor metabolic process	brca,kich,kirc,kirp,lihc,luad,prad	7
GO:0051289~protein homotetramerization	blca,brca,kich,kirc,kirp,lihc,luad	7
GO:0065003~macromolecular complex assembly	blca,brca,hnsc,kirc,kirp,luad,lusc	7
GO:0071840~cellular component organization or biogenesis	blca,brca,hnsc,kirc,luad,lusc,prad	7
GO:0097708~intracellular vesicle	kich,kirc,kirp,luad,lusc,stad,thca	7
GO:0098791~Golgi subcompartment	hnsc,kirc,kirp,luad,lusc,prad,stad	7
GO:0098796~membrane protein complex	brca,kirc,kirp,luad,prad,thca,ucec	7
GO:1901135~carbohydrate derivative metabolic process	brca,kich,kirc,kirp,luad,lusc,prad	7
GO:1902589~single-organism organelle organization	blca,brca,hnsc,kirc,luad,lusc,prad	7
GO:1903047~mitotic cell cycle process	blca,brca,hnsc,kirc,lihc,luad,lusc	7
GO:1903901~negative regulation of viral life cycle	brca,hnsc,kirc,kirp,lihc,luad,prad	7
GO:1903902~positive regulation of viral life cycle	brca,hnsc,kirc,lihc,luad,lusc,thca	7
GO:0000062~fatty-acyl-CoA binding	brca,kich,kirc,kirp,lihc,thca	6
GO:0000118~histone deacetylase complex	brca,hnsc,kirc,kirp,stad,thca	6
GO:0000278~mitotic cell cycle	blca,brca,hnsc,kirc,luad,lusc	6
GO:0000731~DNA synthesis involved in DNA repair	blca,brca,hnsc,lihc,luad,lusc	6
GO:0000775~chromosome, centromeric region	blca,brca,hnsc,luad,lusc,stad	6
GO:0000777~condensed chromosome kinetochore	blca,brca,hnsc,lihc,luad,lusc	6
GO:0000779~condensed chromosome, centromeric region	blca,brca,hnsc,luad,lusc,stad	6
GO:0001726~ruffle	brca,kich,kirc,kirp,lusc,stad	6
GO:0001824~blastocyst development	blca,hnsc,kirp,lihc,luad,lusc	6
GO:0001882~nucleoside binding	brca,hnsc,kirc,kirp,luad,stad	6
GO:0001883~purine nucleoside binding	brca,hnsc,kirc,kirp,luad,stad	6
GO:0001968~fibronectin binding	brca,hnsc,kirc,kirp,prad,thca	6
GO:0002456~T cell mediated immunity	brca,hnsc,kirc,luad,lusc,thca	6
GO:0005524~ATP binding	brca,hnsc,kirc,kirp,luad,stad	6
GO:0005776~autophagosome	blca,brca,kirc,luad,lusc,thca	6
GO:0005815~microtubule organizing center	brca,hnsc,kirc,luad,lusc,thca	6
GO:0005819~spindle	brca,hnsc,kirc,luad,lusc,thca	6
GO:0006261~DNA-dependent DNA replication	blca,brca,hnsc,kirp,lihc,lusc	6
GO:0006301~postreplication repair	blca,brca,hnsc,lusc,prad,thca	6
GO:0006310~DNA recombination	brca,hnsc,lihc,luad,lusc,thca	6
GO:0006353~DNA-templated transcription, termination	brca,kich,kirc,lihc,luad,thca	6
GO:0006417~regulation of translation	brca,kirc,kirp,luad,stad,thca	6
GO:0006551~leucine metabolic process	brca,kich,kirc,kirp,prad,thca	6
GO:0006631~fatty acid metabolic process	kich,kirc,kirp,lihc,luad,prad	6
GO:0006635~fatty acid beta-oxidation	brca,kich,kirc,kirp,lihc,luad	6
GO:0006664~glycolipid metabolic process	brca,kich,kirp,luad,lusc,stad	6
GO:0006890~retrograde vesicle-mediated transport, Golgi to ER	brca,kirc,luad,lusc,prad,stad	6
GO:0007031~peroxisome organization	blca,kich,lihc,luad,lusc,prad	6
GO:0009062~fatty acid catabolic process	brca,kich,kirc,kirp,lihc,luad	6
GO:0009067~aspartate family amino acid biosynthetic process	brca,kirc,kirp,lihc,luad,thca	6
GO:0009123~nucleoside monophosphate metabolic process	blca,kich,kirc,lihc,luad,prad	6
GO:0009314~response to radiation	blca,brca,hnsc,kirc,luad,lusc	6
GO:0009889~regulation of biosynthetic process	blca,brca,kirc,luad,stad,thca	6
GO:0010498~proteasomal protein catabolic process	brca,hnsc,kirc,luad,stad,thca	6
GO:0010506~regulation of autophagy	brca,kirc,lihc,luad,lusc,stad	6
GO:0010556~regulation of macromolecule biosynthetic process	blca,brca,kirc,luad,stad,thca	6
GO:0010608~posttranscriptional regulation of gene expression	brca,kirc,kirp,luad,stad,thca	6
GO:0016043~cellular component organization	blca,brca,hnsc,kirc,luad,lusc	6
GO:0016054~organic acid catabolic process	brca,hnsc,kich,kirc,kirp,lihc	6
GO:0016462~pyrophosphatase activity	hnsc,kirc,kirp,lihc,luad,lusc	6
GO:0016604~nuclear body	brca,hnsc,kirc,lihc,luad,thca	6
GO:0016925~protein sumoylation	blca,brca,kirc,luad,stad,thca	6
GO:0019219~regulation of nucleobase-containing compound metabolic process	blca,brca,kirc,luad,stad,thca	6
GO:0019915~lipid storage	brca,kich,kirc,kirp,lihc,lusc	6
GO:0022402~cell cycle process	blca,brca,hnsc,kirc,luad,lusc	6
GO:0030260~entry into host cell	hnsc,kirc,lihc,luad,prad,thca	6
GO:0030554~adenyl nucleotide binding	brca,hnsc,kirc,kirp,luad,stad	6
GO:0031265~CD95 death-inducing signaling complex	hnsc,kich,kirp,luad,lusc,thca	6
GO:0031301~integral component of organelle membrane	blca,kich,kirp,luad,lusc,thca	6
GO:0031570~DNA integrity checkpoint	blca,brca,hnsc,luad,lusc,stad	6
GO:0031625~ubiquitin protein ligase binding	brca,hnsc,kirc,luad,lusc,thca	6
GO:0031984~organelle subcompartment	hnsc,kirc,kirp,luad,lusc,prad	6
GO:0032549~ribonucleoside binding	brca,hnsc,kirc,kirp,luad,stad	6
GO:0032550~purine ribonucleoside binding	brca,hnsc,kirc,kirp,luad,stad	6
GO:0032559~adenyl ribonucleotide binding	brca,hnsc,kirc,kirp,luad,stad	6
GO:0033554~cellular response to stress	brca,hnsc,kirc,luad,lusc,thca	6
GO:0034248~regulation of cellular amide metabolic process	brca,kirc,kirp,luad,stad,thca	6
GO:0035329~hippo signaling	brca,hnsc,kich,kirp,luad,lusc	6
GO:0035639~purine ribonucleoside triphosphate binding	brca,hnsc,kirc,kirp,luad,stad	6
GO:0035770~ribonucleoprotein granule	brca,hnsc,kirc,kirp,luad,stad	6
GO:0042149~cellular response to glucose starvation	blca,brca,kirp,luad,stad,thca	6
GO:0042273~ribosomal large subunit biogenesis	hnsc,kirc,lihc,luad,lusc,thca	6
GO:0042274~ribosomal small subunit biogenesis	blca,hnsc,kich,lihc,lusc,prad	6
GO:0042770~signal transduction in response to DNA damage	blca,cesc,hnsc,kirc,luad,lusc	6
GO:0043161~proteasome-mediated ubiquitin-dependent protein catabolic process	brca,hnsc,kirc,luad,stad,thca	6
GO:0043169~cation binding	blca,brca,kich,luad,prad,thca	6
GO:0044409~entry into host	hnsc,kirc,lihc,luad,prad,thca	6
GO:0044710~single-organism metabolic process	kich,kirc,kirp,lihc,luad,prad	6
GO:0045071~negative regulation of viral genome replication	brca,hnsc,kirc,kirp,luad,prad	6
GO:0046718~viral entry into host cell	hnsc,kirc,lihc,luad,prad,thca	6
GO:0048525~negative regulation of viral process	brca,hnsc,kirc,lihc,luad,prad	6
GO:0050662~coenzyme binding	kirc,kirp,lihc,luad,prad,thca	6
GO:0051171~regulation of nitrogen compound metabolic process	blca,brca,kirc,luad,stad,thca	6
GO:0051188~cofactor biosynthetic process	brca,kich,kirc,kirp,luad,thca	6
GO:0051234~establishment of localization	brca,kirc,kirp,luad,lusc,prad	6
GO:0051252~regulation of RNA metabolic process	blca,brca,kirc,luad,stad,thca	6
GO:0051262~protein tetramerization	blca,brca,kirc,kirp,lihc,lusc	6
GO:0051297~centrosome organization	blca,brca,kirc,luad,lusc,thca	6
GO:0051603~proteolysis involved in cellular protein catabolic process	brca,hnsc,kirc,luad,stad,thca	6
GO:0051806~entry into cell of other organism involved in symbiotic interaction	hnsc,kirc,lihc,luad,prad,thca	6
GO:0051828~entry into other organism involved in symbiotic interaction	hnsc,kirc,lihc,luad,prad,thca	6
GO:0055086~nucleobase-containing small molecule metabolic process	kich,kirc,kirp,lihc,lusc,prad	6
GO:0061077~chaperone-mediated protein folding	brca,kirc,kirp,luad,stad,thca	6
GO:0070469~respiratory chain	blca,kich,kirc,kirp,lihc,prad	6
GO:0097153~cysteine-type endopeptidase activity involved in apoptotic process	hnsc,kirc,kirp,lusc,prad,thca	6
GO:0097367~carbohydrate derivative binding	hnsc,kirc,kirp,luad,prad,stad	6
GO:0097659~nucleic acid-templated transcription	blca,brca,kirc,lihc,luad,thca	6
GO:0098576~lumenal side of membrane	brca,kirc,kirp,lihc,luad,lusc	6
GO:0098589~membrane region	blca,brca,kirc,kirp,luad,stad	6
GO:0098687~chromosomal region	blca,brca,hnsc,luad,lusc,stad	6
GO:1900034~regulation of cellular response to heat	blca,brca,hnsc,kich,kirc,stad	6
GO:1900117~regulation of execution phase of apoptosis	brca,hnsc,kirc,luad,prad,thca	6
GO:2000112~regulation of cellular macromolecule biosynthetic process	blca,brca,kirc,luad,stad,thca	6
GO:0000077~DNA damage checkpoint	blca,hnsc,luad,lusc,stad	5
GO:0000724~double-strand break repair via homologous recombination	blca,brca,hnsc,luad,lusc	5
GO:0000732~strand displacement	blca,brca,hnsc,luad,lusc	5
GO:0000793~condensed chromosome	blca,brca,hnsc,luad,lusc	5
GO:0001510~RNA methylation	brca,hnsc,lihc,luad,thca	5
GO:0001816~cytokine production	hnsc,kirc,kirp,luad,stad	5
GO:0001817~regulation of cytokine production	hnsc,kirc,kirp,luad,stad	5
GO:0002221~pattern recognition receptor signaling pathway	hnsc,kirc,kirp,luad,stad	5
GO:0002755~MyD88-dependent toll-like receptor signaling pathway	hnsc,kirc,kirp,lihc,luad	5
GO:0003684~damaged DNA binding	brca,hnsc,kich,lusc,prad	5
GO:0003729~mRNA binding	brca,kich,luad,lusc,stad	5
GO:0003743~translation initiation factor activity	brca,kich,kirc,kirp,luad	5
GO:0004065~arylsulfatase activity	brca,kich,kirc,kirp,lusc	5
GO:0004842~ubiquitin-protein transferase activity	brca,hnsc,kich,kirc,lusc	5
GO:0005643~nuclear pore	blca,brca,hnsc,luad,stad	5
GO:0005856~cytoskeleton	blca,brca,hnsc,kirc,lusc	5
GO:0006271~DNA strand elongation involved in DNA replication	blca,hnsc,kirp,lihc,lusc	5
GO:0006552~leucine catabolic process	brca,kirc,kirp,luad,prad	5
GO:0006692~prostanoid metabolic process	hnsc,kich,kirc,luad,prad	5
GO:0006693~prostaglandin metabolic process	hnsc,kich,kirc,luad,prad	5
GO:0006810~transport	kirc,kirp,lihc,luad,prad	5
GO:0006906~vesicle fusion	brca,hnsc,kirc,luad,thca	5
GO:0006914~autophagy	blca,kirc,luad,lusc,thca	5
GO:0007041~lysosomal transport	blca,kirp,lusc,prad,thca	5
GO:0007062~sister chromatid cohesion	blca,hnsc,kirc,luad,stad	5
GO:0009126~purine nucleoside monophosphate metabolic process	blca,kich,kirc,lihc,prad	5
GO:0009167~purine ribonucleoside monophosphate metabolic process	blca,kich,kirc,lihc,prad	5
GO:0009615~response to virus	brca,hnsc,kirc,luad,lusc	5
GO:0010485~H4 histone acetyltransferase activity	blca,brca,hnsc,lihc,luad	5
GO:0010564~regulation of cell cycle process	blca,brca,hnsc,kirc,luad	5
GO:0010948~negative regulation of cell cycle process	blca,brca,hnsc,luad,lusc	5
GO:0015630~microtubule cytoskeleton	brca,hnsc,kirc,luad,lusc	5
GO:0016558~protein import into peroxisome matrix	blca,brca,lihc,luad,prad	5
GO:0016741~transferase activity, transferring one-carbon groups	hnsc,kich,lihc,prad,thca	5
GO:0016817~hydrolase activity, acting on acid anhydrides	hnsc,kirc,kirp,lihc,lusc	5
GO:0016836~hydro-lyase activity	kirc,kirp,luad,lusc,prad	5
GO:0019222~regulation of metabolic process	blca,brca,luad,stad,thca	5
GO:0019898~extrinsic component of membrane	hnsc,kich,kirc,kirp,stad	5
GO:0019901~protein kinase binding	brca,hnsc,kirc,luad,stad	5
GO:0022411~cellular component disassembly	blca,brca,kirc,luad,prad	5
GO:0022607~cellular component assembly	blca,brca,kirc,luad,lusc	5
GO:0022616~DNA strand elongation	blca,hnsc,kirp,lihc,lusc	5
GO:0030262~apoptotic nuclear changes	blca,brca,hnsc,lihc,stad	5
GO:0031023~microtubule organizing center organization	blca,brca,kirc,luad,thca	5
GO:0031123~RNA 3'-end processing	brca,kirc,lihc,luad,stad	5
GO:0031201~SNARE complex	brca,kirc,kirp,luad,thca	5
GO:0031261~DNA replication preinitiation complex	hnsc,kirp,lihc,luad,lusc	5
GO:0031323~regulation of cellular metabolic process	blca,brca,luad,stad,thca	5
GO:0031326~regulation of cellular biosynthetic process	blca,brca,kirc,stad,thca	5
GO:0031629~synaptic vesicle fusion to presynaptic active zone membrane	brca,kirc,kirp,luad,lusc	5
GO:0032006~regulation of TOR signaling	blca,kich,kirp,luad,prad	5
GO:0032456~endocytic recycling	brca,kich,kirc,kirp,luad	5
GO:0032481~positive regulation of type I interferon production	brca,hnsc,kirc,kirp,luad	5
GO:0034340~response to type I interferon	blca,hnsc,kich,kirc,luad	5
GO:0034605~cellular response to heat	brca,hnsc,kirc,kirp,luad	5
GO:0035872~nucleotide-binding domain, leucine rich repeat containing receptor signaling pathway	brca,hnsc,kirc,lihc,luad	5
GO:0036464~cytoplasmic ribonucleoprotein granule	brca,hnsc,kirc,kirp,luad	5
GO:0042470~melanosome	hnsc,luad,prad,stad,thca	5
GO:0042645~mitochondrial nucleoid	brca,kirc,kirp,luad,stad	5
GO:0043687~post-translational protein modification	brca,kich,kirc,kirp,luad	5
GO:0043900~regulation of multi-organism process	hnsc,kirc,luad,lusc,stad	5
GO:0044255~cellular lipid metabolic process	kich,kirc,kirp,lihc,luad	5
GO:0044389~ubiquitin-like protein ligase binding	brca,hnsc,kirc,luad,thca	5
GO:0044839~cell cycle G2/M phase transition	blca,brca,hnsc,kirc,luad	5
GO:0045088~regulation of innate immune response	brca,hnsc,kirc,luad,stad	5
GO:0045862~positive regulation of proteolysis	brca,kirc,luad,stad,thca	5
GO:0046133~pyrimidine ribonucleoside catabolic process	blca,hnsc,kich,luad,lusc	5
GO:0046395~carboxylic acid catabolic process	brca,kich,kirc,kirp,lihc	5
GO:0046467~membrane lipid biosynthetic process	kich,kirp,luad,lusc,stad	5
GO:0048285~organelle fission	blca,brca,hnsc,kirc,luad	5
GO:0048770~pigment granule	hnsc,luad,prad,stad,thca	5
GO:0050821~protein stabilization	brca,kirc,luad,lusc,thca	5
GO:0055114~oxidation-reduction process	kich,kirc,kirp,lihc,prad	5
GO:0060148~positive regulation of posttranscriptional gene silencing	blca,brca,luad,stad,thca	5
GO:0060255~regulation of macromolecule metabolic process	blca,brca,luad,stad,thca	5
GO:0060964~regulation of gene silencing by miRNA	brca,kirc,luad,stad,thca	5
GO:0061025~membrane fusion	brca,kirc,kirp,luad,lusc	5
GO:0065002~intracellular protein transmembrane transport	brca,kirp,luad,prad,thca	5
GO:0072329~monocarboxylic acid catabolic process	brca,kich,kirc,kirp,lihc	5
GO:0072529~pyrimidine-containing compound catabolic process	brca,kich,kirc,lihc,lusc	5
GO:0080090~regulation of primary metabolic process	blca,brca,luad,stad,thca	5
GO:0086014~atrial cardiac muscle cell action potential	blca,brca,cesc,kich,lihc	5
GO:0086026~atrial cardiac muscle cell to AV node cell signaling	blca,brca,cesc,kich,lihc	5
GO:0090174~organelle membrane fusion	brca,hnsc,kirc,luad,thca	5
GO:0097342~ripoptosome	hnsc,kich,kirp,lusc,thca	5
GO:0098847~sequence-specific single stranded DNA binding	blca,brca,hnsc,lihc,lusc	5
GO:0098903~regulation of membrane repolarization during action potential	kich,kirc,kirp,lihc,prad	5
GO:0099500~vesicle fusion to plasma membrane	brca,kirc,kirp,luad,lusc	5
GO:1902510~regulation of apoptotic DNA fragmentation	brca,hnsc,kirc,kirp,lihc	5
GO:1902807~negative regulation of cell cycle G1/S phase transition	hnsc,kich,kirc,luad,lusc	5
GO:1903050~regulation of proteolysis involved in cellular protein catabolic process	brca,kirc,luad,stad,thca	5
GO:1903427~negative regulation of reactive oxygen species biosynthetic process	kirc,kirp,luad,thca,ucec	5
GO:1903509~liposaccharide metabolic process	brca,kich,kirp,luad,stad	5
GO:1903624~regulation of DNA catabolic process	brca,hnsc,kirc,kirp,lihc	5
GO:2000134~negative regulation of G1/S transition of mitotic cell cycle	hnsc,kich,kirc,luad,lusc	5
GO:2000637~positive regulation of gene silencing by miRNA	blca,brca,luad,stad,thca	5
GO:2001044~regulation of integrin-mediated signaling pathway	blca,hnsc,kich,lihc,lusc	5
GO:0000086~G2/M transition of mitotic cell cycle	brca,hnsc,kirc,luad	4
GO:0000151~ubiquitin ligase complex	brca,kirc,lihc,luad	4
GO:0000209~protein polyubiquitination	brca,hnsc,kirc,luad	4
GO:0000280~nuclear division	blca,brca,hnsc,luad	4
GO:0000413~protein peptidyl-prolyl isomerization	brca,kirc,luad,thca	4
GO:0000462~maturation of SSU-rRNA from tricistronic rRNA transcript (SSU-rRNA, 5.8S rRNA, LSU-rRNA)	hnsc,lihc,lusc,prad	4
GO:0000723~telomere maintenance	brca,hnsc,luad,thca	4
GO:0000808~origin recognition complex	blca,hnsc,lihc,lusc	4
GO:0000819~sister chromatid segregation	blca,brca,hnsc,luad	4
GO:0001054~RNA polymerase I activity	brca,hnsc,kich,luad	4
GO:0001666~response to hypoxia	blca,hnsc,kirc,luad	4
GO:0001671~ATPase activator activity	brca,kirc,kirp,luad	4
GO:0002483~antigen processing and presentation of endogenous peptide antigen	hnsc,kich,kirc,kirp	4
GO:0003755~peptidyl-prolyl cis-trans isomerase activity	brca,kirc,luad,thca	4
GO:0003779~actin binding	kirc,lusc,prad,stad	4
GO:0004905~type I interferon receptor activity	blca,kich,lihc,lusc	4
GO:0005635~nuclear envelope	brca,kirc,luad,prad	4
GO:0005664~nuclear origin of replication recognition complex	blca,hnsc,lihc,lusc	4
GO:0005667~transcription factor complex	blca,kirc,kirp,thca	4
GO:0005736~DNA-directed RNA polymerase I complex	brca,hnsc,kich,luad	4
GO:0005747~mitochondrial respiratory chain complex I	kich,kirc,lihc,prad	4
GO:0005811~lipid particle	brca,hnsc,kirp,lusc	4
GO:0005901~caveola	brca,kirc,prad,thca	4
GO:0006119~oxidative phosphorylation	kich,kirc,lihc,prad	4
GO:0006189~'de novo' IMP biosynthetic process	brca,kirp,luad,lusc	4
GO:0006296~nucleotide-excision repair, DNA incision, 5'-to lesion	brca,hnsc,kirp,thca	4
GO:0006362~transcription elongation from RNA polymerase I promoter	brca,hnsc,kich,thca	4
GO:0006363~termination of RNA polymerase I transcription	brca,hnsc,kich,thca	4
GO:0006403~RNA localization	brca,kirc,luad,stad	4
GO:0006409~tRNA export from nucleus	blca,brca,hnsc,stad	4
GO:0006606~protein import into nucleus	brca,kirc,luad,stad	4
GO:0006625~protein targeting to peroxisome	blca,brca,lihc,luad	4
GO:0006687~glycosphingolipid metabolic process	kich,kirc,kirp,stad	4
GO:0006913~nucleocytoplasmic transport	brca,kirc,luad,stad	4
GO:0007029~endoplasmic reticulum organization	brca,kich,kirc,kirp	4
GO:0007033~vacuole organization	brca,kirc,thca,ucec	4
GO:0007049~cell cycle	blca,brca,hnsc,luad	4
GO:0007067~mitotic nuclear division	blca,brca,hnsc,luad	4
GO:0007569~cell aging	kirc,luad,thca,ucec	4
GO:0008047~enzyme activator activity	brca,kirc,kirp,thca	4
GO:0008134~transcription factor binding	brca,kirc,stad,thca	4
GO:0008168~methyltransferase activity	hnsc,lihc,prad,thca	4
GO:0008360~regulation of cell shape	brca,kirc,lusc,prad	4
GO:0008635~activation of cysteine-type endopeptidase activity involved in apoptotic process by cytochrome c	kirc,kirp,lusc,prad	4
GO:0008637~apoptotic mitochondrial changes	hnsc,kich,kirc,lusc	4
GO:0009055~electron carrier activity	kich,kirc,kirp,lihc	4
GO:0009141~nucleoside triphosphate metabolic process	blca,kich,kirc,prad	4
GO:0009144~purine nucleoside triphosphate metabolic process	blca,kich,kirc,prad	4
GO:0009166~nucleotide catabolic process	hnsc,kirc,lusc,thca	4
GO:0009199~ribonucleoside triphosphate metabolic process	blca,kich,kirc,prad	4
GO:0009295~nucleoid	kirc,kirp,luad,stad	4
GO:0009299~mRNA transcription	brca,kirc,luad,thca	4
GO:0009411~response to UV	brca,hnsc,kirc,thca	4
GO:0009628~response to abiotic stimulus	blca,brca,hnsc,kirc	4
GO:0009894~regulation of catabolic process	brca,kirc,luad,stad	4
GO:0009987~cellular process	brca,kirc,kirp,luad	4
GO:0010494~cytoplasmic stress granule	brca,kich,luad,stad	4
GO:0010955~negative regulation of protein processing	kirc,kirp,lihc,lusc	4
GO:0015931~nucleobase-containing compound transport	kirc,lihc,luad,prad	4
GO:0016023~cytoplasmic, membrane-bounded vesicle	kich,kirp,luad,stad	4
GO:0016491~oxidoreductase activity	kirc,kirp,lihc,prad	4
GO:0016581~NuRD complex	brca,hnsc,kirp,thca	4
GO:0016787~hydrolase activity	kich,kirp,lihc,stad	4
GO:0016810~hydrolase activity, acting on carbon-nitrogen (but not peptide) bonds	blca,kich,kirp,lihc	4
GO:0016859~cis-trans isomerase activity	brca,kirc,luad,thca	4
GO:0018208~peptidyl-proline modification	brca,kirc,luad,thca	4
GO:0019883~antigen processing and presentation of endogenous antigen	hnsc,kich,kirc,kirp	4
GO:0019900~kinase binding	brca,hnsc,kirc,luad	4
GO:0019962~type I interferon binding	blca,kich,lihc,lusc	4
GO:0030163~protein catabolic process	brca,kirc,luad,stad	4
GO:0030686~90S preribosome	hnsc,kich,lihc,prad	4
GO:0030894~replisome	brca,hnsc,kich,lihc	4
GO:0030964~NADH dehydrogenase complex	kich,kirc,lihc,prad	4
GO:0031264~death-inducing signaling complex	hnsc,kich,kirp,lusc	4
GO:0031329~regulation of cellular catabolic process	brca,kirc,luad,stad	4
GO:0031331~positive regulation of cellular catabolic process	brca,kirc,luad,stad	4
GO:0031347~regulation of defense response	hnsc,kirc,lihc,luad	4
GO:0031528~microvillus membrane	brca,kich,kirc,luad	4
GO:0031902~late endosome membrane	brca,kirc,lusc,thca	4
GO:0031965~nuclear membrane	brca,kirc,luad,prad	4
GO:0032392~DNA geometric change	brca,hnsc,kirp,lusc	4
GO:0032446~protein modification by small protein conjugation	brca,hnsc,kirc,luad	4
GO:0032587~ruffle membrane	brca,kirc,kirp,lusc	4
GO:0032787~monocarboxylic acid metabolic process	kirc,kirp,lihc,prad	4
GO:0033290~eukaryotic 48S preinitiation complex	hnsc,kich,kirp,thca	4
GO:0033539~fatty acid beta-oxidation using acyl-CoA dehydrogenase	brca,kirc,kirp,lihc	4
GO:0034504~protein localization to nucleus	brca,kirc,luad,stad	4
GO:0034622~cellular macromolecular complex assembly	blca,brca,kirc,lusc	4
GO:0034976~response to endoplasmic reticulum stress	hnsc,luad,prad,thca	4
GO:0036293~response to decreased oxygen levels	blca,hnsc,kirc,luad	4
GO:0042769~DNA damage response, detection of DNA damage	brca,hnsc,lusc,thca	4
GO:0042773~ATP synthesis coupled electron transport	kich,kirc,lihc,prad	4
GO:0042775~mitochondrial ATP synthesis coupled electron transport	kich,kirc,lihc,prad	4
GO:0043047~single-stranded telomeric DNA binding	hnsc,kich,lihc,lusc	4
GO:0043412~macromolecule modification	brca,hnsc,luad,stad	4
GO:0043601~nuclear replisome	brca,hnsc,kich,lihc	4
GO:0043618~regulation of transcription from RNA polymerase II promoter in response to stress	kirc,kirp,luad,thca	4
GO:0043620~regulation of DNA-templated transcription in response to stress	kirc,kirp,luad,thca	4
GO:0043901~negative regulation of multi-organism process	brca,hnsc,luad,prad	4
GO:0043902~positive regulation of multi-organism process	hnsc,kirc,luad,stad	4
GO:0044257~cellular protein catabolic process	brca,kirc,luad,stad	4
GO:0044712~single-organism catabolic process	brca,kirc,kirp,lihc	4
GO:0044744~protein targeting to nucleus	brca,kirc,luad,stad	4
GO:0044798~nuclear transcription factor complex	brca,kirc,kirp,thca	4
GO:0044853~plasma membrane raft	brca,kirc,prad,thca	4
GO:0045271~respiratory chain complex I	kich,kirc,lihc,prad	4
GO:0045333~cellular respiration	blca,kich,kirc,kirp	4
GO:0046034~ATP metabolic process	blca,kich,kirc,prad	4
GO:0046131~pyrimidine ribonucleoside metabolic process	blca,kich,luad,prad	4
GO:0046487~glyoxylate metabolic process	kich,kirc,kirp,thca	4
GO:0046782~regulation of viral transcription	hnsc,kirc,lihc,lusc	4
GO:0048471~perinuclear region of cytoplasm	brca,hnsc,kirc,luad	4
GO:0051092~positive regulation of NF-kappaB transcription factor activity	hnsc,kirc,lihc,luad	4
GO:0051169~nuclear transport	brca,kirc,luad,stad	4
GO:0051170~nuclear import	brca,kirc,luad,stad	4
GO:0051276~chromosome organization	blca,brca,hnsc,stad	4
GO:0051646~mitochondrion localization	hnsc,kirc,kirp,lihc	4
GO:0060147~regulation of posttranscriptional gene silencing	brca,kirc,stad,thca	4
GO:0060966~regulation of gene silencing by RNA	brca,kirc,stad,thca	4
GO:0070423~nucleotide-binding oligomerization domain containing signaling pathway	hnsc,kirc,lihc,luad	4
GO:0070482~response to oxygen levels	blca,hnsc,kirc,luad	4
GO:0070993~translation preinitiation complex	hnsc,kich,kirp,thca	4
GO:0071431~tRNA-containing ribonucleoprotein complex export from nucleus	blca,brca,hnsc,stad	4
GO:0071478~cellular response to radiation	blca,brca,hnsc,kirp	4
GO:0071806~protein transmembrane transport	brca,lihc,luad,prad	4
GO:0072662~protein localization to peroxisome	blca,brca,lihc,luad	4
GO:0072663~establishment of protein localization to peroxisome	blca,brca,lihc,luad	4
GO:0086066~atrial cardiac muscle cell to AV node cell communication	brca,cesc,kich,lihc	4
GO:0090068~positive regulation of cell cycle process	brca,hnsc,luad,lusc	4
GO:0090161~Golgi ribbon formation	brca,kich,lusc,prad	4
GO:0090305~nucleic acid phosphodiester bond hydrolysis	brca,hnsc,kich,lihc	4
GO:0090545~CHD-type complex	brca,hnsc,kirp,thca	4
GO:0098798~mitochondrial protein complex	kich,kirc,kirp,prad	4
GO:0098813~nuclear chromosome segregation	blca,brca,hnsc,luad	4
GO:0098857~membrane microdomain	brca,kirc,luad,stad	4
GO:1901605~alpha-amino acid metabolic process	kich,kirc,kirp,lihc	4
GO:1901990~regulation of mitotic cell cycle phase transition	brca,hnsc,kirc,luad	4
GO:1902593~single-organism nuclear import	brca,kirc,luad,stad	4
GO:1903052~positive regulation of proteolysis involved in cellular protein catabolic process	brca,kirc,luad,thca	4
GO:1903318~negative regulation of protein maturation	kirc,kirp,lihc,lusc	4
GO:1903362~regulation of cellular protein catabolic process	brca,kirc,luad,stad	4
GO:1990391~DNA repair complex	brca,hnsc,kirc,lihc	4
GO:0000375~RNA splicing, via transesterification reactions	brca,kirc,luad	3
GO:0000377~RNA splicing, via transesterification reactions with bulged adenosine as nucleophile	brca,kirc,luad	3
GO:0000398~mRNA splicing, via spliceosome	brca,kirc,luad	3
GO:0000439~core TFIIH complex	kirc,kirp,thca	3
GO:0000460~maturation of 5.8S rRNA	kich,lihc,prad	3
GO:0000463~maturation of LSU-rRNA from tricistronic rRNA transcript (SSU-rRNA, 5.8S rRNA, LSU-rRNA)	hnsc,kich,lihc	3
GO:0000466~maturation of 5.8S rRNA from tricistronic rRNA transcript (SSU-rRNA, 5.8S rRNA, LSU-rRNA)	kich,lihc,prad	3
GO:0001819~positive regulation of cytokine production	hnsc,kirc,luad	3
GO:0001948~glycoprotein binding	kirp,lihc,luad	3
GO:0002218~activation of innate immune response	hnsc,kirc,luad	3
GO:0002252~immune effector process	hnsc,luad,lusc	3
GO:0002376~immune system process	hnsc,lusc,stad	3
GO:0002495~antigen processing and presentation of peptide antigen via MHC class II	kirc,kirp,lusc	3
GO:0002504~antigen processing and presentation of peptide or polysaccharide antigen via MHC class II	kirc,kirp,lusc	3
GO:0002697~regulation of immune effector process	hnsc,kirc,luad	3
GO:0002709~regulation of T cell mediated immunity	brca,hnsc,lusc	3
GO:0002758~innate immune response-activating signal transduction	hnsc,kirc,luad	3
GO:0002949~tRNA threonylcarbamoyladenosine modification	brca,luad,stad	3
GO:0003382~epithelial cell morphogenesis	kirc,luad,thca	3
GO:0003720~telomerase activity	brca,hnsc,stad	3
GO:0003924~GTPase activity	brca,hnsc,kirp	3
GO:0004300~enoyl-CoA hydratase activity	brca,kirp,luad	3
GO:0004904~interferon receptor activity	kirc,luad,thca	3
GO:0005078~MAP-kinase scaffold activity	kirp,prad,ucec	3
GO:0005697~telomerase holoenzyme complex	hnsc,kich,prad	3
GO:0005770~late endosome	brca,luad,thca	3
GO:0005798~Golgi-associated vesicle	luad,stad,thca	3
GO:0005813~centrosome	brca,kirc,luad	3
GO:0005871~kinesin complex	hnsc,kirc,lusc	3
GO:0005876~spindle microtubule	brca,hnsc,luad	3
GO:0005905~clathrin-coated pit	kirc,kirp,stad	3
GO:0005938~cell cortex	brca,kirc,luad	3
GO:0006336~DNA replication-independent nucleosome assembly	blca,luad,lusc	3
GO:0006354~DNA-templated transcription, elongation	hnsc,lusc,thca	3
GO:0006355~regulation of transcription, DNA-templated	blca,brca,thca	3
GO:0006397~mRNA processing	brca,kirc,luad	3
GO:0006400~tRNA modification	brca,hnsc,luad	3
GO:0006448~regulation of translational elongation	brca,kirc,luad	3
GO:0006450~regulation of translational fidelity	brca,kirc,luad	3
GO:0006476~protein deacetylation	brca,luad,thca	3
GO:0006486~protein glycosylation	kich,kirp,prad	3
GO:0006575~cellular modified amino acid metabolic process	kirc,lihc,thca	3
GO:0006670~sphingosine metabolic process	hnsc,kich,luad	3
GO:0006732~coenzyme metabolic process	kirc,kirp,lihc	3
GO:0007006~mitochondrial membrane organization	kirc,lusc,ucec	3
GO:0007044~cell-substrate junction assembly	brca,kirc,luad	3
GO:0007045~cell-substrate adherens junction assembly	brca,kirc,luad	3
GO:0007098~centrosome cycle	blca,brca,luad	3
GO:0008092~cytoskeletal protein binding	brca,hnsc,kirc	3
GO:0008156~negative regulation of DNA replication	brca,hnsc,stad	3
GO:0008173~RNA methyltransferase activity	brca,lihc,thca	3
GO:0008250~oligosaccharyltransferase complex	kirc,luad,ucec	3
GO:0008270~zinc ion binding	brca,lihc,luad	3
GO:0008380~RNA splicing	brca,kirc,luad	3
GO:0008484~sulfuric ester hydrolase activity	brca,kich,kirp	3
GO:0008652~cellular amino acid biosynthetic process	kirc,lihc,thca	3
GO:0008654~phospholipid biosynthetic process	brca,lihc,stad	3
GO:0009066~aspartate family amino acid metabolic process	kirc,lihc,thca	3
GO:0009100~glycoprotein metabolic process	kich,kirp,luad	3
GO:0009205~purine ribonucleoside triphosphate metabolic process	blca,kirc,prad	3
GO:0009267~cellular response to starvation	blca,luad,thca	3
GO:0009895~negative regulation of catabolic process	brca,kirc,thca	3
GO:0010225~response to UV-C	blca,brca,luad	3
GO:0010332~response to gamma radiation	blca,lusc,stad	3
GO:0010811~positive regulation of cell-substrate adhesion	brca,kirp,thca	3
GO:0010866~regulation of triglyceride biosynthetic process	brca,kirc,lihc	3
GO:0010867~positive regulation of triglyceride biosynthetic process	brca,kirc,lihc	3
GO:0010883~regulation of lipid storage	brca,kich,kirc	3
GO:0012501~programmed cell death	hnsc,kirc,stad	3
GO:0015129~lactate transmembrane transporter activity	kich,lusc,prad	3
GO:0016192~vesicle-mediated transport	kirc,lusc,stad	3
GO:0016505~peptidase activator activity involved in apoptotic process	brca,hnsc,kich	3
GO:0016607~nuclear speck	brca,kirc,luad	3
GO:0016628~oxidoreductase activity, acting on the CH-CH group of donors, NAD or NADP as acceptor	brca,kirc,luad	3
GO:0016746~transferase activity, transferring acyl groups	brca,kirp,lihc	3
GO:0016747~transferase activity, transferring acyl groups other than amino-acyl groups	brca,kirp,lihc	3
GO:0016887~ATPase activity	hnsc,kirp,lihc	3
GO:0017038~protein import	brca,kirc,luad	3
GO:0017119~Golgi transport complex	kirc,kirp,prad	3
GO:0018196~peptidyl-asparagine modification	luad,lusc,thca	3
GO:0018279~protein N-linked glycosylation via asparagine	luad,lusc,thca	3
GO:0019076~viral release from host cell	brca,luad,thca	3
GO:0019886~antigen processing and presentation of exogenous peptide antigen via MHC class II	kirc,kirp,lusc	3
GO:0022900~electron transport chain	kich,kirc,prad	3
GO:0022904~respiratory electron transport chain	kich,kirc,prad	3
GO:0030029~actin filament-based process	brca,kirc,prad	3
GO:0030100~regulation of endocytosis	kirc,kirp,lihc	3
GO:0030119~AP-type membrane coat adaptor complex	kirc,prad,stad	3
GO:0030660~Golgi-associated vesicle membrane	kirc,luad,stad	3
GO:0030684~preribosome	kich,lihc,prad	3
GO:0031082~BLOC complex	hnsc,kich,kirc	3
GO:0031083~BLOC-1 complex	hnsc,kich,kirc	3
GO:0031124~mRNA 3'-end processing	brca,luad,stad	3
GO:0031253~cell projection membrane	brca,kirc,kirp	3
GO:0031256~leading edge membrane	brca,kirc,kirp	3
GO:0031571~mitotic G1 DNA damage checkpoint	hnsc,luad,lusc	3
GO:0031624~ubiquitin conjugating enzyme binding	brca,kirc,luad	3
GO:0031669~cellular response to nutrient levels	hnsc,luad,thca	3
GO:0031996~thioesterase binding	brca,luad,thca	3
GO:0031998~regulation of fatty acid beta-oxidation	brca,kich,thca	3
GO:0032196~transposition	kirc,kirp,lihc	3
GO:0032259~methylation	hnsc,prad,thca	3
GO:0032434~regulation of proteasomal ubiquitin-dependent protein catabolic process	kirc,luad,thca	3
GO:0032436~positive regulation of proteasomal ubiquitin-dependent protein catabolic process	kirc,luad,thca	3
GO:0032594~protein transport within lipid bilayer	brca,kirc,thca	3
GO:0033683~nucleotide-excision repair, DNA incision	hnsc,kirp,thca	3
GO:0033688~regulation of osteoblast proliferation	kich,lihc,stad	3
GO:0034333~adherens junction assembly	brca,kirc,luad	3
GO:0034498~early endosome to Golgi transport	kirp,luad,thca	3
GO:0035356~cellular triglyceride homeostasis	kirc,prad,thca	3
GO:0035384~thioester biosynthetic process	kich,kirc,kirp	3
GO:0035455~response to interferon-alpha	hnsc,luad,lusc	3
GO:0036109~alpha-linolenic acid metabolic process	lihc,luad,prad	3
GO:0042176~regulation of protein catabolic process	kirc,luad,stad	3
GO:0042177~negative regulation of protein catabolic process	brca,hnsc,kirc	3
GO:0042789~mRNA transcription from RNA polymerase II promoter	kirc,luad,thca	3
GO:0043296~apical junction complex	brca,luad,lusc	3
GO:0043413~macromolecule glycosylation	kich,kirp,prad	3
GO:0043496~regulation of protein homodimerization activity	lihc,prad,thca	3
GO:0043542~endothelial cell migration	kirc,stad,thca	3
GO:0043574~peroxisomal transport	brca,lihc,luad	3
GO:0043933~macromolecular complex subunit organization	brca,kirc,luad	3
GO:0044282~small molecule catabolic process	kirc,kirp,lihc	3
GO:0044783~G1 DNA damage checkpoint	hnsc,luad,lusc	3
GO:0044819~mitotic G1/S transition checkpoint	hnsc,luad,lusc	3
GO:0045121~membrane raft	brca,kirc,stad	3
GO:0045240~dihydrolipoyl dehydrogenase complex	hnsc,kirc,lihc	3
GO:0045931~positive regulation of mitotic cell cycle	blca,brca,hnsc	3
GO:0046135~pyrimidine nucleoside catabolic process	kirc,lihc,lusc	3
GO:0046349~amino sugar biosynthetic process	blca,kirp,stad	3
GO:0046777~protein autophosphorylation	brca,hnsc,stad	3
GO:0046822~regulation of nucleocytoplasmic transport	kirc,luad,stad	3
GO:0048002~antigen processing and presentation of peptide antigen	kirc,kirp,luad	3
GO:0048041~focal adhesion assembly	brca,kirc,luad	3
GO:0048259~regulation of receptor-mediated endocytosis	kich,kirc,kirp	3
GO:0050434~positive regulation of viral transcription	hnsc,kirc,lihc	3
GO:0051084~'de novo' posttranslational protein folding	brca,kirp,prad	3
GO:0051090~regulation of sequence-specific DNA binding transcription factor activity	cesc,kirc,luad	3
GO:0051168~nuclear export	kirc,luad,stad	3
GO:0051220~cytoplasmic sequestering of protein	kirp,luad,stad	3
GO:0051236~establishment of RNA localization	lihc,luad,stad	3
GO:0051259~protein oligomerization	brca,kirc,kirp	3
GO:0051640~organelle localization	brca,hnsc,kirc	3
GO:0051987~positive regulation of attachment of spindle microtubules to kinetochore	brca,kirc,luad	3
GO:0060090~binding, bridging	lihc,prad,ucec	3
GO:0060337~type I interferon signaling pathway	blca,hnsc,kirc	3
GO:0061136~regulation of proteasomal protein catabolic process	kirc,luad,thca	3
GO:0061635~regulation of protein complex stability	kirc,luad,thca	3
GO:0070613~regulation of protein processing	kirc,lihc,lusc	3
GO:0071157~negative regulation of cell cycle arrest	hnsc,lihc,lusc	3
GO:0071158~positive regulation of cell cycle arrest	hnsc,luad,lusc	3
GO:0071357~cellular response to type I interferon	blca,hnsc,kirc	3
GO:0071616~acyl-CoA biosynthetic process	kich,kirc,kirp	3
GO:0071963~establishment or maintenance of cell polarity regulating cell shape	kich,lusc,prad	3
GO:0072332~intrinsic apoptotic signaling pathway by p53 class mediator	brca,kirc,thca	3
GO:0072395~signal transduction involved in cell cycle checkpoint	blca,hnsc,luad	3
GO:0072401~signal transduction involved in DNA integrity checkpoint	blca,hnsc,luad	3
GO:0072422~signal transduction involved in DNA damage checkpoint	blca,hnsc,luad	3
GO:0072527~pyrimidine-containing compound metabolic process	brca,kich,lihc	3
GO:0080134~regulation of response to stress	hnsc,kirc,stad	3
GO:0086019~cell-cell signaling involved in cardiac conduction	cesc,kirc,prad	3
GO:0090207~regulation of triglyceride metabolic process	brca,kirc,lihc	3
GO:0097039~protein linear polyubiquitination	hnsc,lihc,luad	3
GO:0097199~cysteine-type endopeptidase activity involved in apoptotic signaling pathway	kich,lihc,lusc	3
GO:0097539~ciliary transition fiber	blca,hnsc,lusc	3
GO:0099568~cytoplasmic region	brca,kirc,luad	3
GO:1901136~carbohydrate derivative catabolic process	hnsc,kirc,lusc	3
GO:1901222~regulation of NIK/NF-kappaB signaling	kirc,stad,thca	3
GO:1901532~regulation of hematopoietic progenitor cell differentiation	blca,stad,thca	3
GO:1901607~alpha-amino acid biosynthetic process	kirc,lihc,thca	3
GO:1901661~quinone metabolic process	kirc,kirp,prad	3
GO:1901800~positive regulation of proteasomal protein catabolic process	kirc,luad,thca	3
GO:1901987~regulation of cell cycle phase transition	brca,hnsc,luad	3
GO:1903364~positive regulation of cellular protein catabolic process	brca,kirc,luad	3
GO:1903506~regulation of nucleic acid-templated transcription	blca,brca,thca	3
GO:1905031~regulation of membrane repolarization during cardiac muscle cell action potential	kich,kirp,lihc	3
GO:1990204~oxidoreductase complex	kirc,kirp,lihc	3
GO:2000045~regulation of G1/S transition of mitotic cell cycle	hnsc,kirc,luad	3
GO:2000378~negative regulation of reactive oxygen species metabolic process	kirc,luad,thca	3
GO:2000696~regulation of epithelial cell differentiation involved in kidney development	brca,kirc,stad	3
GO:2001141~regulation of RNA biosynthetic process	blca,brca,thca	3
GO:0000014~single-stranded DNA endodeoxyribonuclease activity	hnsc,prad	2
GO:0000075~cell cycle checkpoint	blca,hnsc	2
GO:0000076~DNA replication checkpoint	brca,hnsc	2
GO:0000302~response to reactive oxygen species	kirc,kirp	2
GO:0000407~pre-autophagosomal structure	kirc,thca	2
GO:0000421~autophagosome membrane	brca,kirc	2
GO:0000469~cleavage involved in rRNA processing	kich,prad	2
GO:0000470~maturation of LSU-rRNA	lihc,prad	2
GO:0001098~basal transcription machinery binding	brca,luad	2
GO:0001099~basal RNA polymerase II transcription machinery binding	brca,luad	2
GO:0001180~transcription initiation from RNA polymerase I promoter for nuclear large rRNA transcript	kich,lusc	2
GO:0001188~RNA polymerase I transcriptional preinitiation complex assembly	kich,lusc	2
GO:0001189~RNA polymerase I transcriptional preinitiation complex assembly at the promoter for the nuclear large rRNA transcript	kich,lusc	2
GO:0001568~blood vessel development	cesc,stad	2
GO:0001569~patterning of blood vessels	kirc,thca	2
GO:0001701~in utero embryonic development	blca,lusc	2
GO:0001913~T cell mediated cytotoxicity	hnsc,lusc	2
GO:0001944~vasculature development	cesc,stad	2
GO:0002183~cytoplasmic translational initiation	kirc,luad	2
GO:0002190~cap-independent translational initiation	kirc,luad	2
GO:0002192~IRES-dependent translational initiation	kirc,luad	2
GO:0002224~toll-like receptor signaling pathway	hnsc,kirc	2
GO:0002230~positive regulation of defense response to virus by host	hnsc,lusc	2
GO:0002698~negative regulation of immune effector process	hnsc,thca	2
GO:0002711~positive regulation of T cell mediated immunity	brca,lusc	2
GO:0003725~double-stranded RNA binding	brca,hnsc	2
GO:0003727~single-stranded RNA binding	brca,stad	2
GO:0003980~UDP-glucose:glycoprotein glucosyltransferase activity	lusc,prad	2
GO:0003995~acyl-CoA dehydrogenase activity	kirp,lihc	2
GO:0004553~hydrolase activity, hydrolyzing O-glycosyl compounds	kirp,luad	2
GO:0004896~cytokine receptor activity	hnsc,kirc	2
GO:0005338~nucleotide-sugar transmembrane transporter activity	brca,kirp	2
GO:0005665~DNA-directed RNA polymerase II, core complex	luad,stad	2
GO:0005681~spliceosomal complex	kirc,luad	2
GO:0005689~U12-type spliceosomal complex	brca,prad	2
GO:0005788~endoplasmic reticulum lumen	hnsc,luad	2
GO:0005852~eukaryotic translation initiation factor 3 complex	kirp,lihc	2
GO:0005874~microtubule	hnsc,kirc	2
GO:0006091~generation of precursor metabolites and energy	kich,kirc	2
GO:0006120~mitochondrial electron transport, NADH to ubiquinone	kirc,prad	2
GO:0006123~mitochondrial electron transport, cytochrome c to oxygen	kich,kirc	2
GO:0006275~regulation of DNA replication	brca,stad	2
GO:0006278~RNA-dependent DNA biosynthetic process	brca,hnsc	2
GO:0006295~nucleotide-excision repair, DNA incision, 3'-to lesion	kirp,thca	2
GO:0006302~double-strand break repair	hnsc,lusc	2
GO:0006304~DNA modification	brca,prad	2
GO:0006338~chromatin remodeling	brca,luad	2
GO:0006360~transcription from RNA polymerase I promoter	kich,thca	2
GO:0006361~transcription initiation from RNA polymerase I promoter	kich,thca	2
GO:0006368~transcription elongation from RNA polymerase II promoter	lusc,thca	2
GO:0006369~termination of RNA polymerase II transcription	brca,kirc	2
GO:0006378~mRNA polyadenylation	brca,luad	2
GO:0006383~transcription from RNA polymerase III promoter	brca,kirc	2
GO:0006405~RNA export from nucleus	blca,lihc	2
GO:0006446~regulation of translational initiation	kirc,luad	2
GO:0006458~'de novo' protein folding	brca,prad	2
GO:0006461~protein complex assembly	brca,kirc	2
GO:0006509~membrane protein ectodomain proteolysis	luad,stad	2
GO:0006511~ubiquitin-dependent protein catabolic process	brca,stad	2
GO:0006515~misfolded or incompletely synthesized protein catabolic process	lusc,prad	2
GO:0006553~lysine metabolic process	kirc,lihc	2
GO:0006554~lysine catabolic process	kirc,lihc	2
GO:0006611~protein export from nucleus	kirc,luad	2
GO:0006623~protein targeting to vacuole	blca,thca	2
GO:0006633~fatty acid biosynthetic process	kirc,prad	2
GO:0006637~acyl-CoA metabolic process	kirc,kirp	2
GO:0006672~ceramide metabolic process	luad,thca	2
GO:0006733~oxidoreduction coenzyme metabolic process	kirc,kirp	2
GO:0006753~nucleoside phosphate metabolic process	kirc,prad	2
GO:0006793~phosphorus metabolic process	kirc,stad	2
GO:0006796~phosphate-containing compound metabolic process	kirc,stad	2
GO:0006892~post-Golgi vesicle-mediated transport	kirc,luad	2
GO:0006896~Golgi to vacuole transport	kirc,luad	2
GO:0006977~DNA damage response, signal transduction by p53 class mediator resulting in cell cycle arrest	hnsc,luad	2
GO:0007009~plasma membrane organization	brca,kirc	2
GO:0007010~cytoskeleton organization	brca,kirc	2
GO:0007017~microtubule-based process	brca,cesc	2
GO:0007051~spindle organization	hnsc,luad	2
GO:0007059~chromosome segregation	blca,hnsc	2
GO:0007100~mitotic centrosome separation	hnsc,luad	2
GO:0007160~cell-matrix adhesion	brca,thca	2
GO:0007346~regulation of mitotic cell cycle	brca,hnsc	2
GO:0008094~DNA-dependent ATPase activity	blca,hnsc	2
GO:0008219~cell death	kirc,stad	2
GO:0008312~7S RNA binding	kirp,thca	2
GO:0008509~anion transmembrane transporter activity	kirc,kirp	2
GO:0008625~extrinsic apoptotic signaling pathway via death domain receptors	hnsc,kirc	2
GO:0008757~S-adenosylmethionine-dependent methyltransferase activity	lihc,thca	2
GO:0009063~cellular amino acid catabolic process	kirc,lihc	2
GO:0009068~aspartate family amino acid catabolic process	kirc,lihc	2
GO:0009069~serine family amino acid metabolic process	kirc,lihc	2
GO:0009086~methionine biosynthetic process	kirc,thca	2
GO:0009101~glycoprotein biosynthetic process	kirp,luad	2
GO:0009117~nucleotide metabolic process	kirc,prad	2
GO:0009154~purine ribonucleotide catabolic process	kirc,thca	2
GO:0009259~ribonucleotide metabolic process	kirc,prad	2
GO:0009311~oligosaccharide metabolic process	luad,thca	2
GO:0009408~response to heat	hnsc,kirc	2
GO:0009452~7-methylguanosine RNA capping	hnsc,thca	2
GO:0009649~entrainment of circadian clock	brca,luad	2
GO:0009896~positive regulation of catabolic process	luad,stad	2
GO:0010042~response to manganese ion	kirp,thca	2
GO:0010594~regulation of endothelial cell migration	kirc,lihc	2
GO:0010596~negative regulation of endothelial cell migration	kirc,lihc	2
GO:0010633~negative regulation of epithelial cell migration	kirc,lihc	2
GO:0010638~positive regulation of organelle organization	brca,kirc	2
GO:0012506~vesicle membrane	kirc,kirp	2
GO:0015194~L-serine transmembrane transporter activity	brca,hnsc	2
GO:0015377~cation:chloride symporter activity	kirc,kirp	2
GO:0015629~actin cytoskeleton	kirc,prad	2
GO:0015825~L-serine transport	brca,hnsc	2
GO:0015980~energy derivation by oxidation of organic compounds	kich,kirc	2
GO:0016020~membrane	lusc,stad	2
GO:0016042~lipid catabolic process	brca,lihc	2
GO:0016053~organic acid biosynthetic process	kirc,lihc	2
GO:0016239~positive regulation of macroautophagy	brca,luad	2
GO:0016310~phosphorylation	kirc,stad	2
GO:0016441~posttranscriptional gene silencing	kirc,stad	2
GO:0016458~gene silencing	brca,stad	2
GO:0016567~protein ubiquitination	brca,hnsc	2
GO:0016575~histone deacetylation	brca,thca	2
GO:0016624~oxidoreductase activity, acting on the aldehyde or oxo group of donors, disulfide as acceptor	kirc,kirp	2
GO:0016645~oxidoreductase activity, acting on the CH-NH group of donors	kirc,lihc	2
GO:0016655~oxidoreductase activity, acting on NAD(P)H, quinone or similar compound as acceptor	kirc,prad	2
GO:0016772~transferase activity, transferring phosphorus-containing groups	hnsc,stad	2
GO:0016788~hydrolase activity, acting on ester bonds	kich,kirc	2
GO:0016814~hydrolase activity, acting on carbon-nitrogen (but not peptide) bonds, in cyclic amidines	kich,kirp	2
GO:0016835~carbon-oxygen lyase activity	luad,prad	2
GO:0016860~intramolecular oxidoreductase activity	kirc,luad	2
GO:0016874~ligase activity	brca,kirc	2
GO:0016879~ligase activity, forming carbon-nitrogen bonds	brca,kich	2
GO:0017148~negative regulation of translation	kirc,luad	2
GO:0019166~trans-2-enoyl-CoA reductase (NADPH) activity	blca,stad	2
GO:0019693~ribose phosphate metabolic process	kirc,prad	2
GO:0019787~ubiquitin-like protein transferase activity	brca,hnsc	2
GO:0019843~rRNA binding	kirc,thca	2
GO:0019903~protein phosphatase binding	hnsc,thca	2
GO:0021762~substantia nigra development	kich,stad	2
GO:0022889~serine transmembrane transporter activity	brca,hnsc	2
GO:0030036~actin cytoskeleton organization	brca,kirc	2
GO:0030117~membrane coat	kirc,stad	2
GO:0030120~vesicle coat	kirc,stad	2
GO:0030148~sphingolipid biosynthetic process	luad,thca	2
GO:0030175~filopodium	kirc,prad	2
GO:0030330~DNA damage response, signal transduction by p53 class mediator	blca,luad	2
GO:0030522~intracellular receptor signaling pathway	hnsc,kirc	2
GO:0030659~cytoplasmic vesicle membrane	kirc,kirp	2
GO:0030881~beta-2-microglobulin binding	kich,prad	2
GO:0030905~retromer, tubulation complex	kirc,lihc	2
GO:0031032~actomyosin structure organization	brca,prad	2
GO:0031267~small GTPase binding	kirc,stad	2
GO:0031293~membrane protein intracellular domain proteolysis	kirc,luad	2
GO:0031330~negative regulation of cellular catabolic process	brca,kirc	2
GO:0031397~negative regulation of protein ubiquitination	brca,luad	2
GO:0031589~cell-substrate adhesion	brca,thca	2
GO:0031749~D2 dopamine receptor binding	brca,kirc	2
GO:0031929~TOR signaling	blca,kich	2
GO:0031941~filamentous actin	blca,lihc	2
GO:0032007~negative regulation of TOR signaling	blca,kich	2
GO:0032060~bleb assembly	kich,lusc	2
GO:0032182~ubiquitin-like protein binding	brca,stad	2
GO:0032200~telomere organization	brca,hnsc	2
GO:0032205~negative regulation of telomere maintenance	hnsc,prad	2
GO:0032403~protein complex binding	lusc,stad	2
GO:0032507~maintenance of protein location in cell	kirc,luad	2
GO:0032608~interferon-beta production	hnsc,luad	2
GO:0032781~positive regulation of ATPase activity	brca,kirc	2
GO:0032880~regulation of protein localization	kirc,luad	2
GO:0032988~ribonucleoprotein complex disassembly	kirc,luad	2
GO:0033043~regulation of organelle organization	brca,kirc	2
GO:0033559~unsaturated fatty acid metabolic process	kirc,luad	2
GO:0033632~regulation of cell-cell adhesion mediated by integrin	kirp,luad	2
GO:0034035~purine ribonucleoside bisphosphate metabolic process	lihc,thca	2
GO:0034045~pre-autophagosomal structure membrane	kirc,thca	2
GO:0034080~CENP-A containing nucleosome assembly	blca,luad	2
GO:0034249~negative regulation of cellular amide metabolic process	kirc,stad	2
GO:0034250~positive regulation of cellular amide metabolic process	kirc,luad	2
GO:0034311~diol metabolic process	kich,luad	2
GO:0034329~cell junction assembly	brca,kirc	2
GO:0034330~cell junction organization	brca,kirc	2
GO:0034446~substrate adhesion-dependent cell spreading	brca,thca	2
GO:0034508~centromere complex assembly	blca,kirc	2
GO:0034614~cellular response to reactive oxygen species	kirc,kirp	2
GO:0034644~cellular response to UV	brca,thca	2
GO:0034708~methyltransferase complex	brca,hnsc	2
GO:0034724~DNA replication-independent nucleosome organization	blca,luad	2
GO:0034769~basement membrane disassembly	lihc,prad	2
GO:0034975~protein folding in endoplasmic reticulum	stad,thca	2
GO:0035023~regulation of Rho protein signal transduction	brca,thca	2
GO:0035091~phosphatidylinositol binding	kirc,stad	2
GO:0035194~posttranscriptional gene silencing by RNA	kirc,stad	2
GO:0035330~regulation of hippo signaling	brca,hnsc	2
GO:0035331~negative regulation of hippo signaling	luad,thca	2
GO:0035358~regulation of peroxisome proliferator activated receptor signaling pathway	brca,thca	2
GO:0035383~thioester metabolic process	kirc,kirp	2
GO:0035461~vitamin transmembrane transport	brca,kirc	2
GO:0035556~intracellular signal transduction	kirc,stad	2
GO:0035601~protein deacylation	brca,thca	2
GO:0036260~RNA capping	hnsc,thca	2
GO:0036294~cellular response to decreased oxygen levels	hnsc,luad	2
GO:0039528~cytoplasmic pattern recognition receptor signaling pathway in response to virus	hnsc,kirc	2
GO:0040029~regulation of gene expression, epigenetic	brca,stad	2
GO:0042157~lipoprotein metabolic process	lihc,stad	2
GO:0042278~purine nucleoside metabolic process	kirc,prad	2
GO:0042594~response to starvation	blca,thca	2
GO:0042641~actomyosin	brca,stad	2
GO:0042762~regulation of sulfur metabolic process	kirc,thca	2
GO:0042802~identical protein binding	brca,kirc	2
GO:0043021~ribonucleoprotein complex binding	luad,thca	2
GO:0043028~cysteine-type endopeptidase regulator activity involved in apoptotic process	kich,kirp	2
GO:0043038~amino acid activation	brca,kirc	2
GO:0043039~tRNA aminoacylation	brca,kirc	2
GO:0043085~positive regulation of catalytic activity	kirc,stad	2
GO:0043130~ubiquitin binding	brca,stad	2
GO:0043138~3'-5' DNA helicase activity	hnsc,lusc	2
GO:0043281~regulation of cysteine-type endopeptidase activity involved in apoptotic process	hnsc,kirc	2
GO:0043293~apoptosome	lusc,prad	2
GO:0043631~RNA polyadenylation	brca,luad	2
GO:0044093~positive regulation of molecular function	kirc,stad	2
GO:0044242~cellular lipid catabolic process	brca,lihc	2
GO:0044283~small molecule biosynthetic process	kirc,lihc	2
GO:0044390~ubiquitin-like protein conjugating enzyme binding	kirc,luad	2
GO:0044452~nucleolar part	kich,lihc	2
GO:0044454~nuclear chromosome part	brca,hnsc	2
GO:0044665~MLL1/2 complex	brca,hnsc	2
GO:0045087~innate immune response	hnsc,luad	2
GO:0045089~positive regulation of innate immune response	hnsc,kirc	2
GO:0045185~maintenance of protein location	kirc,luad	2
GO:0045216~cell-cell junction organization	brca,kirc	2
GO:0045727~positive regulation of translation	kirc,luad	2
GO:0046041~ITP metabolic process	lusc,prad	2
GO:0046112~nucleobase biosynthetic process	kich,kirp	2
GO:0046128~purine ribonucleoside metabolic process	kirc,prad	2
GO:0046148~pigment biosynthetic process	kich,kirp	2
GO:0046394~carboxylic acid biosynthetic process	kirc,lihc	2
GO:0046486~glycerolipid metabolic process	lihc,stad	2
GO:0046605~regulation of centrosome cycle	blca,brca	2
GO:0048012~hepatocyte growth factor receptor signaling pathway	kirc,luad	2
GO:0048284~organelle fusion	brca,kirc	2
GO:0048475~coated membrane	kirc,stad	2
GO:0048514~blood vessel morphogenesis	cesc,stad	2
GO:0048583~regulation of response to stimulus	kirc,stad	2
GO:0050000~chromosome localization	blca,brca	2
GO:0050427~3'-phosphoadenosine 5'-phosphosulfate metabolic process	lihc,thca	2
GO:0050657~nucleic acid transport	luad,stad	2
GO:0050658~RNA transport	luad,stad	2
GO:0050660~flavin adenine dinucleotide binding	kirp,lihc	2
GO:0051015~actin filament binding	kirc,stad	2
GO:0051020~GTPase binding	kirc,stad	2
GO:0051028~mRNA transport	luad,stad	2
GO:0051179~localization	kirc,luad	2
GO:0051299~centrosome separation	brca,hnsc	2
GO:0051345~positive regulation of hydrolase activity	brca,kirc	2
GO:0051597~response to methylmercury	kich,kirp	2
GO:0051651~maintenance of location in cell	kirc,luad	2
GO:0051726~regulation of cell cycle	blca,hnsc	2
GO:0051783~regulation of nuclear division	brca,hnsc	2
GO:0051788~response to misfolded protein	prad,thca	2
GO:0051983~regulation of chromosome segregation	brca,hnsc	2
GO:0051988~regulation of attachment of spindle microtubules to kinetochore	brca,luad	2
GO:0052890~oxidoreductase activity, acting on the CH-CH group of donors, with a flavin as acceptor	kirp,lihc	2
GO:0055088~lipid homeostasis	kirc,lihc	2
GO:0055090~acylglycerol homeostasis	kirc,lihc	2
GO:0060055~angiogenesis involved in wound healing	brca,thca	2
GO:0060390~regulation of SMAD protein import into nucleus	kirp,luad	2
GO:0061418~regulation of transcription from RNA polymerase II promoter in response to hypoxia	kirc,luad	2
GO:0061617~MICOS complex	brca,prad	2
GO:0061630~ubiquitin protein ligase activity	hnsc,kich	2
GO:0061641~CENP-A containing chromatin organization	blca,luad	2
GO:0061659~ubiquitin-like protein ligase activity	hnsc,kich	2
GO:0070085~glycosylation	kirp,prad	2
GO:0070198~protein localization to chromosome, telomeric region	brca,luad	2
GO:0070242~thymocyte apoptotic process	kirc,luad	2
GO:0070271~protein complex biogenesis	brca,kirc	2
GO:0070328~triglyceride homeostasis	kirc,lihc	2
GO:0070525~tRNA threonylcarbamoyladenosine metabolic process	brca,luad	2
GO:0070534~protein K63-linked ubiquitination	hnsc,luad	2
GO:0070584~mitochondrion morphogenesis	kirc,luad	2
GO:0070647~protein modification by small protein conjugation or removal	brca,luad	2
GO:0070979~protein K11-linked ubiquitination	kirc,stad	2
GO:0071156~regulation of cell cycle arrest	hnsc,lusc	2
GO:0071214~cellular response to abiotic stimulus	blca,hnsc	2
GO:0071339~MLL1 complex	brca,hnsc	2
GO:0071375~cellular response to peptide hormone stimulus	brca,stad	2
GO:0071479~cellular response to ionizing radiation	lihc,stad	2
GO:0071482~cellular response to light stimulus	brca,hnsc	2
GO:0071494~cellular response to UV-C	blca,kirp	2
GO:0071822~protein complex subunit organization	brca,kirc	2
GO:0072331~signal transduction by p53 class mediator	blca,luad	2
GO:0072413~signal transduction involved in mitotic cell cycle checkpoint	hnsc,luad	2
GO:0072431~signal transduction involved in mitotic G1 DNA damage checkpoint	hnsc,luad	2
GO:0072524~pyridine-containing compound metabolic process	kirc,luad	2
GO:0072666~establishment of protein localization to vacuole	blca,thca	2
GO:0072686~mitotic spindle	brca,luad	2
GO:0090504~epiboly	kich,lihc	2
GO:0090575~RNA polymerase II transcription factor complex	kirc,thca	2
GO:0097359~UDP-glucosylation	lusc,prad	2
GO:0098656~anion transmembrane transport	kirc,kirp	2
GO:0098732~macromolecule deacylation	brca,thca	2
GO:0098800~inner mitochondrial membrane protein complex	kirc,prad	2
GO:1900026~positive regulation of substrate adhesion-dependent cell spreading	brca,thca	2
GO:1900101~regulation of endoplasmic reticulum unfolded protein response	kirc,luad	2
GO:1900118~negative regulation of execution phase of apoptosis	brca,hnsc	2
GO:1900119~positive regulation of execution phase of apoptosis	brca,luad	2
GO:1901071~glucosamine-containing compound metabolic process	kirp,stad	2
GO:1901224~positive regulation of NIK/NF-kappaB signaling	stad,thca	2
GO:1901264~carbohydrate derivative transport	kirp,luad	2
GO:1901505~carbohydrate derivative transporter activity	hnsc,kirp	2
GO:1901606~alpha-amino acid catabolic process	kirc,lihc	2
GO:1901991~negative regulation of mitotic cell cycle phase transition	hnsc,lusc	2
GO:1902041~regulation of extrinsic apoptotic signaling pathway via death domain receptors	brca,kirc	2
GO:1902400~intracellular signal transduction involved in G1 DNA damage checkpoint	hnsc,luad	2
GO:1902402~signal transduction involved in mitotic DNA damage checkpoint	hnsc,luad	2
GO:1902403~signal transduction involved in mitotic DNA integrity checkpoint	hnsc,luad	2
GO:1902532~negative regulation of intracellular signal transduction	blca,stad	2
GO:1902806~regulation of cell cycle G1/S phase transition	hnsc,luad	2
GO:1903008~organelle disassembly	kirc,luad	2
GO:1903020~positive regulation of glycoprotein metabolic process	kirc,luad	2
GO:1903317~regulation of protein maturation	lihc,lusc	2
GO:1903321~negative regulation of protein modification by small protein conjugation or removal	brca,luad	2
GO:1903827~regulation of cellular protein localization	kirc,luad	2
GO:1903894~regulation of IRE1-mediated unfolded protein response	lihc,luad	2
GO:1990542~mitochondrial transmembrane transport	kich,prad	2
GO:1990778~protein localization to cell periphery	brca,kirc	2
GO:0000083~regulation of transcription involved in G1/S transition of mitotic cell cycle	luad	1
GO:0000109~nucleotide-excision repair complex	brca	1
GO:0000146~microfilament motor activity	stad	1
GO:0000149~SNARE binding	thca	1
GO:0000150~recombinase activity	brca	1
GO:0000217~DNA secondary structure binding	brca	1
GO:0000226~microtubule cytoskeleton organization	brca	1
GO:0000228~nuclear chromosome	brca	1
GO:0000287~magnesium ion binding	stad	1
GO:0000288~nuclear-transcribed mRNA catabolic process, deadenylation-dependent decay	stad	1
GO:0000301~retrograde transport, vesicle recycling within Golgi	prad	1
GO:0000306~extrinsic component of vacuolar membrane	hnsc	1
GO:0000313~organellar ribosome	thca	1
GO:0000400~four-way junction DNA binding	brca	1
GO:0000408~EKC/KEOPS complex	stad	1
GO:0000422~mitophagy	kirc	1
GO:0000479~endonucleolytic cleavage of tricistronic rRNA transcript (SSU-rRNA, 5.8S rRNA, LSU-rRNA)	prad	1
GO:0000707~meiotic DNA recombinase assembly	brca	1
GO:0000715~nucleotide-excision repair, DNA damage recognition	brca	1
GO:0000717~nucleotide-excision repair, DNA duplex unwinding	brca	1
GO:0000730~DNA recombinase assembly	brca	1
GO:0000778~condensed nuclear chromosome kinetochore	luad	1
GO:0000780~condensed nuclear chromosome, centromeric region	luad	1
GO:0000781~chromosome, telomeric region	hnsc	1
GO:0000784~nuclear chromosome, telomeric region	hnsc	1
GO:0000792~heterochromatin	brca	1
GO:0000910~cytokinesis	luad	1
GO:0000922~spindle pole	hnsc	1
GO:0000989~transcription factor activity, transcription factor binding	kirc	1
GO:0001071~nucleic acid binding transcription factor activity	thca	1
GO:0001076~transcription factor activity, RNA polymerase II transcription factor binding	kirc	1
GO:0001091~RNA polymerase II basal transcription factor binding	luad	1
GO:0001094~TFIID-class transcription factor binding	luad	1
GO:0001104~RNA polymerase II transcription cofactor activity	kirc	1
GO:0001525~angiogenesis	stad	1
GO:0001556~oocyte maturation	luad	1
GO:0001561~fatty acid alpha-oxidation	lihc	1
GO:0001562~response to protozoan	kirc	1
GO:0001618~virus receptor activity	prad	1
GO:0001725~stress fiber	brca	1
GO:0001836~release of cytochrome c from mitochondria	kirc	1
GO:0001891~phagocytic cup	kirp	1
GO:0001937~negative regulation of endothelial cell proliferation	lihc	1
GO:0001952~regulation of cell-matrix adhesion	brca	1
GO:0001954~positive regulation of cell-matrix adhesion	brca	1
GO:0001959~regulation of cytokine-mediated signaling pathway	kirc	1
GO:0002011~morphogenesis of an epithelial sheet	kich	1
GO:0002169~3-methylcrotonyl-CoA carboxylase complex, mitochondrial	prad	1
GO:0002181~cytoplasmic translation	kirc	1
GO:0002253~activation of immune response	kirc	1
GO:0002478~antigen processing and presentation of exogenous peptide antigen	kirc	1
GO:0002520~immune system development	stad	1
GO:0002682~regulation of immune system process	kirc	1
GO:0002756~MyD88-independent toll-like receptor signaling pathway	kirc	1
GO:0002764~immune response-regulating signaling pathway	kirc	1
GO:0002888~positive regulation of myeloid leukocyte mediated immunity	luad	1
GO:0003012~muscle system process	prad	1
GO:0003373~dynamin polymerization involved in membrane fission	kirp	1
GO:0003374~dynamin polymerization involved in mitochondrial fission	kirp	1
GO:0003678~DNA helicase activity	hnsc	1
GO:0003700~transcription factor activity, sequence-specific DNA binding	thca	1
GO:0003730~mRNA 3'-UTR binding	stad	1
GO:0003774~motor activity	lusc	1
GO:0003777~microtubule motor activity	lusc	1
GO:0003954~NADH dehydrogenase activity	kirc	1
GO:0003964~RNA-directed DNA polymerase activity	stad	1
GO:0004000~adenosine deaminase activity	kich	1
GO:0004017~adenylate kinase activity	kirp	1
GO:0004029~aldehyde dehydrogenase (NAD) activity	lihc	1
GO:0004115~3',5'-cyclic-AMP phosphodiesterase activity	kirc	1
GO:0004197~cysteine-type endopeptidase activity	stad	1
GO:0004314~[acyl-carrier-protein] S-malonyltransferase activity	prad	1
GO:0004386~helicase activity	hnsc	1
GO:0004485~methylcrotonoyl-CoA carboxylase activity	prad	1
GO:0004520~endodeoxyribonuclease activity	brca	1
GO:0004576~oligosaccharyl transferase activity	ucec	1
GO:0004579~dolichyl-diphosphooligosaccharide-protein glycotransferase activity	ucec	1
GO:0004715~non-membrane spanning protein tyrosine kinase activity	stad	1
GO:0004721~phosphoprotein phosphatase activity	ucec	1
GO:0004812~aminoacyl-tRNA ligase activity	kirc	1
GO:0005154~epidermal growth factor receptor binding	stad	1
GO:0005164~tumor necrosis factor receptor binding	kirp	1
GO:0005198~structural molecule activity	prad	1
GO:0005436~sodium:phosphate symporter activity	kirc	1
GO:0005525~GTP binding	kirp	1
GO:0005543~phospholipid binding	kirc	1
GO:0005545~1-phosphatidylinositol binding	kirc	1
GO:0005637~nuclear inner membrane	blca	1
GO:0005741~mitochondrial outer membrane	kirc	1
GO:0005744~mitochondrial inner membrane presequence translocase complex	thca	1
GO:0005746~mitochondrial respiratory chain	kirc	1
GO:0005758~mitochondrial intermembrane space	prad	1
GO:0005761~mitochondrial ribosome	thca	1
GO:0005779~integral component of peroxisomal membrane	lihc	1
GO:0005849~mRNA cleavage factor complex	brca	1
GO:0005865~striated muscle thin filament	hnsc	1
GO:0005875~microtubule associated complex	lusc	1
GO:0005902~microvillus	brca	1
GO:0005923~bicellular tight junction	brca	1
GO:0005975~carbohydrate metabolic process	luad	1
GO:0006011~UDP-glucose metabolic process	brca	1
GO:0006044~N-acetylglucosamine metabolic process	kirp	1
GO:0006065~UDP-glucuronate biosynthetic process	brca	1
GO:0006090~pyruvate metabolic process	kirc	1
GO:0006096~glycolytic process	kirc	1
GO:0006163~purine nucleotide metabolic process	kirc	1
GO:0006188~IMP biosynthetic process	lusc	1
GO:0006195~purine nucleotide catabolic process	kirc	1
GO:0006198~cAMP catabolic process	kirc	1
GO:0006206~pyrimidine nucleobase metabolic process	lihc	1
GO:0006213~pyrimidine nucleoside metabolic process	luad	1
GO:0006220~pyrimidine nucleotide metabolic process	kich	1
GO:0006222~UMP biosynthetic process	kich	1
GO:0006282~regulation of DNA repair	hnsc	1
GO:0006293~nucleotide-excision repair, preincision complex stabilization	thca	1
GO:0006294~nucleotide-excision repair, preincision complex assembly	brca	1
GO:0006303~double-strand break repair via nonhomologous end joining	hnsc	1
GO:0006308~DNA catabolic process	brca	1
GO:0006309~apoptotic DNA fragmentation	brca	1
GO:0006352~DNA-templated transcription, initiation	kirc	1
GO:0006367~transcription initiation from RNA polymerase II promoter	kirc	1
GO:0006370~7-methylguanosine mRNA capping	thca	1
GO:0006384~transcription initiation from RNA polymerase III promoter	brca	1
GO:0006464~cellular protein modification process	stad	1
GO:0006465~signal peptide processing	thca	1
GO:0006497~protein lipidation	stad	1
GO:0006508~proteolysis	stad	1
GO:0006576~cellular biogenic amine metabolic process	lihc	1
GO:0006577~amino-acid betaine metabolic process	kirc	1
GO:0006590~thyroid hormone generation	thca	1
GO:0006629~lipid metabolic process	lihc	1
GO:0006636~unsaturated fatty acid biosynthetic process	kirc	1
GO:0006638~neutral lipid metabolic process	lihc	1
GO:0006639~acylglycerol metabolic process	lihc	1
GO:0006641~triglyceride metabolic process	lihc	1
GO:0006644~phospholipid metabolic process	stad	1
GO:0006650~glycerophospholipid metabolic process	stad	1
GO:0006690~icosanoid metabolic process	kirc	1
GO:0006743~ubiquinone metabolic process	kirp	1
GO:0006744~ubiquinone biosynthetic process	kirp	1
GO:0006757~ATP generation from ADP	kirc	1
GO:0006766~vitamin metabolic process	kirc	1
GO:0006767~water-soluble vitamin metabolic process	kirc	1
GO:0006768~biotin metabolic process	kirc	1
GO:0006783~heme biosynthetic process	kich	1
GO:0006808~regulation of nitrogen utilization	kirc	1
GO:0006818~hydrogen transport	kirc	1
GO:0006839~mitochondrial transport	prad	1
GO:0006884~cell volume homeostasis	kirc	1
GO:0006895~Golgi to endosome transport	kirc	1
GO:0006915~apoptotic process	kirc	1
GO:0006937~regulation of muscle contraction	cesc	1
GO:0006950~response to stress	hnsc	1
GO:0006955~immune response	hnsc	1
GO:0006979~response to oxidative stress	kirc	1
GO:0006984~ER-nucleus signaling pathway	thca	1
GO:0007040~lysosome organization	kirc	1
GO:0007043~cell-cell junction assembly	kirc	1
GO:0007064~mitotic sister chromatid cohesion	kirc	1
GO:0007088~regulation of mitotic nuclear division	brca	1
GO:0007093~mitotic cell cycle checkpoint	hnsc	1
GO:0007155~cell adhesion	stad	1
GO:0007163~establishment or maintenance of cell polarity	brca	1
GO:0007179~transforming growth factor beta receptor signaling pathway	stad	1
GO:0007584~response to nutrient	lihc	1
GO:0008021~synaptic vesicle	kirp	1
GO:0008080~N-acetyltransferase activity	blca	1
GO:0008137~NADH dehydrogenase (ubiquinone) activity	kirc	1
GO:0008157~protein phosphatase 1 binding	hnsc	1
GO:0008175~tRNA methyltransferase activity	brca	1
GO:0008286~insulin receptor signaling pathway	brca	1
GO:0008353~RNA polymerase II carboxy-terminal domain kinase activity	thca	1
GO:0008610~lipid biosynthetic process	lihc	1
GO:0008656~cysteine-type endopeptidase activator activity involved in apoptotic process	kich	1
GO:0009064~glutamine family amino acid metabolic process	lihc	1
GO:0009112~nucleobase metabolic process	kich	1
GO:0009132~nucleoside diphosphate metabolic process	kirc	1
GO:0009135~purine nucleoside diphosphate metabolic process	kirc	1
GO:0009150~purine ribonucleotide metabolic process	kirc	1
GO:0009173~pyrimidine ribonucleoside monophosphate metabolic process	kich	1
GO:0009174~pyrimidine ribonucleoside monophosphate biosynthetic process	kich	1
GO:0009179~purine ribonucleoside diphosphate metabolic process	kirc	1
GO:0009185~ribonucleoside diphosphate metabolic process	kirc	1
GO:0009226~nucleotide-sugar biosynthetic process	kirp	1
GO:0009247~glycolipid biosynthetic process	stad	1
GO:0009261~ribonucleotide catabolic process	kirc	1
GO:0009266~response to temperature stimulus	hnsc	1
GO:0009416~response to light stimulus	brca	1
GO:0009607~response to biotic stimulus	hnsc	1
GO:0009648~photoperiodism	brca	1
GO:0009650~UV protection	kirc	1
GO:0009838~abscission	luad	1
GO:0009892~negative regulation of metabolic process	stad	1
GO:0009966~regulation of signal transduction	stad	1
GO:0009994~oocyte differentiation	luad	1
GO:0010165~response to X-ray	lusc	1
GO:0010573~vascular endothelial growth factor production	luad	1
GO:0010574~regulation of vascular endothelial growth factor production	luad	1
GO:0010575~positive regulation of vascular endothelial growth factor production	luad	1
GO:0010605~negative regulation of macromolecule metabolic process	stad	1
GO:0010629~negative regulation of gene expression	stad	1
GO:0010632~regulation of epithelial cell migration	kirc	1
GO:0010659~cardiac muscle cell apoptotic process	hnsc	1
GO:0010730~negative regulation of hydrogen peroxide biosynthetic process	lusc	1
GO:0010755~regulation of plasminogen activation	lihc	1
GO:0010810~regulation of cell-substrate adhesion	brca	1
GO:0010821~regulation of mitochondrion organization	kirc	1
GO:0010822~positive regulation of mitochondrion organization	kirc	1
GO:0010833~telomere maintenance via telomere lengthening	brca	1
GO:0010878~cholesterol storage	kirc	1
GO:0010939~regulation of necrotic cell death	kirc	1
GO:0014866~skeletal myofibril assembly	prad	1
GO:0015037~peptide disulfide oxidoreductase activity	hnsc	1
GO:0015103~inorganic anion transmembrane transporter activity	kirp	1
GO:0015114~phosphate ion transmembrane transporter activity	kirc	1
GO:0015175~neutral amino acid transmembrane transporter activity	hnsc	1
GO:0015179~L-amino acid transmembrane transporter activity	hnsc	1
GO:0015291~secondary active transmembrane transporter activity	kirc	1
GO:0015293~symporter activity	kirc	1
GO:0015294~solute:cation symporter activity	kirc	1
GO:0015296~anion:cation symporter activity	kirc	1
GO:0015321~sodium-dependent phosphate transmembrane transporter activity	kirc	1
GO:0015379~potassium:chloride symporter activity	luad	1
GO:0015684~ferrous iron transport	lihc	1
GO:0015691~cadmium ion transport	luad	1
GO:0015705~iodide transport	thca	1
GO:0015727~lactate transport	prad	1
GO:0015932~nucleobase-containing compound transmembrane transporter activity	kirp	1
GO:0016010~dystrophin-associated glycoprotein complex	thca	1
GO:0016050~vesicle organization	kirc	1
GO:0016052~carbohydrate catabolic process	kirc	1
GO:0016082~synaptic vesicle priming	lusc	1
GO:0016234~inclusion body	kirc	1
GO:0016236~macroautophagy	kirc	1
GO:0016289~CoA hydrolase activity	brca	1
GO:0016311~dephosphorylation	ucec	1
GO:0016409~palmitoyltransferase activity	luad	1
GO:0016410~N-acyltransferase activity	blca	1
GO:0016421~CoA carboxylase activity	kirc	1
GO:0016459~myosin complex	stad	1
GO:0016485~protein processing	lihc	1
GO:0016504~peptidase activator activity	brca	1
GO:0016553~base conversion or substitution editing	kirc	1
GO:0016572~histone phosphorylation	hnsc	1
GO:0016592~mediator complex	kirc	1
GO:0016705~oxidoreductase activity, acting on paired donors, with incorporation or reduction of molecular oxygen	prad	1
GO:0016773~phosphotransferase activity, alcohol group as acceptor	stad	1
GO:0016791~phosphatase activity	ucec	1
GO:0016829~lyase activity	prad	1
GO:0016840~carbon-nitrogen lyase activity	lihc	1
GO:0016854~racemase and epimerase activity	kirp	1
GO:0016857~racemase and epimerase activity, acting on carbohydrates and derivatives	kirp	1
GO:0016875~ligase activity, forming carbon-oxygen bonds	kirc	1
GO:0016876~ligase activity, forming aminoacyl-tRNA and related compounds	kirc	1
GO:0016884~carbon-nitrogen ligase activity, with glutamine as amido-N-donor	lusc	1
GO:0016885~ligase activity, forming carbon-carbon bonds	kirc	1
GO:0016903~oxidoreductase activity, acting on the aldehyde or oxo group of donors	lihc	1
GO:0017053~transcriptional repressor complex	stad	1
GO:0017069~snRNA binding	prad	1
GO:0017081~chloride channel regulator activity	kirc	1
GO:0017112~Rab guanyl-nucleotide exchange factor activity	hnsc	1
GO:0017134~fibroblast growth factor binding	lusc	1
GO:0017187~peptidyl-glutamic acid carboxylation	lihc	1
GO:0018146~keratan sulfate biosynthetic process	hnsc	1
GO:0018193~peptidyl-amino acid modification	brca	1
GO:0018200~peptidyl-glutamic acid modification	lihc	1
GO:0018205~peptidyl-lysine modification	brca	1
GO:0018214~protein carboxylation	lihc	1
GO:0018958~phenol-containing compound metabolic process	thca	1
GO:0019048~modulation by virus of host morphology or physiology	brca	1
GO:0019211~phosphatase activator activity	luad	1
GO:0019362~pyridine nucleotide metabolic process	kirc	1
GO:0019432~triglyceride biosynthetic process	lihc	1
GO:0019433~triglyceride catabolic process	lihc	1
GO:0019474~L-lysine catabolic process to acetyl-CoA	lihc	1
GO:0019477~L-lysine catabolic process	lihc	1
GO:0019637~organophosphate metabolic process	kirc	1
GO:0019835~cytolysis	lihc	1
GO:0019867~outer membrane	kirc	1
GO:0019897~extrinsic component of plasma membrane	stad	1
GO:0019904~protein domain specific binding	stad	1
GO:0019941~modification-dependent protein catabolic process	brca	1
GO:0019961~interferon binding	blca	1
GO:0019985~translesion synthesis	hnsc	1
GO:0021795~cerebral cortex cell migration	kirc	1
GO:0021801~cerebral cortex radial glia guided migration	kirc	1
GO:0022030~telencephalon glial cell migration	kirc	1
GO:0022610~biological adhesion	stad	1
GO:0022820~potassium ion symporter activity	luad	1
GO:0022853~active ion transmembrane transporter activity	kirc	1
GO:0030018~Z disc	cesc	1
GO:0030031~cell projection assembly	lusc	1
GO:0030048~actin filament-based movement	prad	1
GO:0030097~hemopoiesis	stad	1
GO:0030118~clathrin coat	stad	1
GO:0030131~clathrin adaptor complex	stad	1
GO:0030162~regulation of proteolysis	stad	1
GO:0030193~regulation of blood coagulation	lihc	1
GO:0030194~positive regulation of blood coagulation	lihc	1
GO:0030195~negative regulation of blood coagulation	lihc	1
GO:0030239~myofibril assembly	prad	1
GO:0030258~lipid modification	lihc	1
GO:0030275~LRR domain binding	kich	1
GO:0030306~ADP-ribosylation factor binding	kirp	1
GO:0030397~membrane disassembly	kirc	1
GO:0030433~ER-associated ubiquitin-dependent protein catabolic process	prad	1
GO:0030488~tRNA methylation	brca	1
GO:0030496~midbody	luad	1
GO:0030705~cytoskeleton-dependent intracellular transport	kirc	1
GO:0030865~cortical cytoskeleton organization	kirc	1
GO:0030866~cortical actin cytoskeleton organization	kirc	1
GO:0030897~HOPS complex	ucec	1
GO:0030898~actin-dependent ATPase activity	stad	1
GO:0030901~midbrain development	stad	1
GO:0030904~retromer complex	kirc	1
GO:0030957~Tat protein binding	kirc	1
GO:0031047~gene silencing by RNA	stad	1
GO:0031055~chromatin remodeling at centromere	blca	1
GO:0031056~regulation of histone modification	brca	1
GO:0031058~positive regulation of histone modification	brca	1
GO:0031072~heat shock protein binding	brca	1
GO:0031080~nuclear pore outer ring	kirc	1
GO:0031145~anaphase-promoting complex-dependent catabolic process	brca	1
GO:0031231~intrinsic component of peroxisomal membrane	lihc	1
GO:0031232~extrinsic component of external side of plasma membrane	kirp	1
GO:0031298~replication fork protection complex	hnsc	1
GO:0031324~negative regulation of cellular metabolic process	stad	1
GO:0031349~positive regulation of defense response	kirc	1
GO:0031369~translation initiation factor binding	kirc	1
GO:0031396~regulation of protein ubiquitination	hnsc	1
GO:0031419~cobalamin binding	kirp	1
GO:0031461~cullin-RING ubiquitin ligase complex	brca	1
GO:0031503~protein complex localization	stad	1
GO:0031512~motile primary cilium	kirc	1
GO:0031572~G2 DNA damage checkpoint	lusc	1
GO:0031638~zymogen activation	lihc	1
GO:0031639~plasminogen activation	lihc	1
GO:0031668~cellular response to extracellular stimulus	thca	1
GO:0031674~I band	cesc	1
GO:0031952~regulation of protein autophosphorylation	kirp	1
GO:0031968~organelle outer membrane	kirc	1
GO:0031994~insulin-like growth factor I binding	brca	1
GO:0032000~positive regulation of fatty acid beta-oxidation	brca	1
GO:0032025~response to cobalt ion	kirc	1
GO:0032089~NACHT domain binding	lihc	1
GO:0032092~positive regulation of protein binding	thca	1
GO:0032153~cell division site	kirc	1
GO:0032155~cell division site part	kirc	1
GO:0032204~regulation of telomere maintenance	brca	1
GO:0032266~phosphatidylinositol-3-phosphate binding	kirc	1
GO:0032269~negative regulation of cellular protein metabolic process	kirc	1
GO:0032400~melanosome localization	thca	1
GO:0032401~establishment of melanosome localization	thca	1
GO:0032402~melanosome transport	thca	1
GO:0032480~negative regulation of type I interferon production	kirc	1
GO:0032535~regulation of cellular component size	kirc	1
GO:0032607~interferon-alpha production	stad	1
GO:0032623~interleukin-2 production	stad	1
GO:0032647~regulation of interferon-alpha production	stad	1
GO:0032663~regulation of interleukin-2 production	stad	1
GO:0032717~negative regulation of interleukin-8 production	kirp	1
GO:0032727~positive regulation of interferon-alpha production	kirp	1
GO:0032736~positive regulation of interleukin-13 production	brca	1
GO:0032790~ribosome disassembly	kirc	1
GO:0032813~tumor necrosis factor receptor superfamily binding	kirc	1
GO:0032869~cellular response to insulin stimulus	brca	1
GO:0032878~regulation of establishment or maintenance of cell polarity	brca	1
GO:0032886~regulation of microtubule-based process	brca	1
GO:0032897~negative regulation of viral transcription	prad	1
GO:0032984~macromolecular complex disassembly	kirc	1
GO:0032994~protein-lipid complex	lihc	1
GO:0033014~tetrapyrrole biosynthetic process	kich	1
GO:0033044~regulation of chromosome organization	brca	1
GO:0033047~regulation of mitotic sister chromatid segregation	hnsc	1
GO:0033061~DNA recombinase mediator complex	brca	1
GO:0033108~mitochondrial respiratory chain complex assembly	kirc	1
GO:0033127~regulation of histone phosphorylation	hnsc	1
GO:0033129~positive regulation of histone phosphorylation	hnsc	1
GO:0033157~regulation of intracellular protein transport	kirc	1
GO:0033194~response to hydroperoxide	kirc	1
GO:0033262~regulation of nuclear cell cycle DNA replication	brca	1
GO:0033306~phytol metabolic process	lihc	1
GO:0033619~membrane protein proteolysis	luad	1
GO:0033622~integrin activation	brca	1
GO:0033627~cell adhesion mediated by integrin	luad	1
GO:0033631~cell-cell adhesion mediated by integrin	luad	1
GO:0033634~positive regulation of cell-cell adhesion mediated by integrin	luad	1
GO:0033865~nucleoside bisphosphate metabolic process	thca	1
GO:0033875~ribonucleoside bisphosphate metabolic process	thca	1
GO:0034032~purine nucleoside bisphosphate metabolic process	thca	1
GO:0034061~DNA polymerase activity	hnsc	1
GO:0034098~VCP-NPL4-UFD1 AAA ATPase complex	stad	1
GO:0034162~toll-like receptor 9 signaling pathway	hnsc	1
GO:0034332~adherens junction organization	kirc	1
GO:0034358~plasma lipoprotein particle	lihc	1
GO:0034361~very-low-density lipoprotein particle	lihc	1
GO:0034381~plasma lipoprotein particle clearance	lihc	1
GO:0034384~high-density lipoprotein particle clearance	lihc	1
GO:0034385~triglyceride-rich lipoprotein particle	lihc	1
GO:0034397~telomere localization	hnsc	1
GO:0034427~nuclear-transcribed mRNA catabolic process, exonucleolytic, 3'-5'	hnsc	1
GO:0034453~microtubule anchoring	brca	1
GO:0034599~cellular response to oxidative stress	kirc	1
GO:0035024~negative regulation of Rho protein signal transduction	luad	1
GO:0035195~gene silencing by miRNA	kirc	1
GO:0035257~nuclear hormone receptor binding	stad	1
GO:0035435~phosphate ion transmembrane transport	kirc	1
GO:0035437~maintenance of protein localization in endoplasmic reticulum	luad	1
GO:0035591~signaling adaptor activity	lihc	1
GO:0035666~TRIF-dependent toll-like receptor signaling pathway	kirc	1
GO:0035694~mitochondrial protein catabolic process	kirc	1
GO:0035751~regulation of lysosomal lumen pH	brca	1
GO:0035873~lactate transmembrane transport	prad	1
GO:0035877~death effector domain binding	kirc	1
GO:0035879~plasma membrane lactate transport	prad	1
GO:0035902~response to immobilization stress	blca	1
GO:0035924~cellular response to vascular endothelial growth factor stimulus	kirc	1
GO:0035966~response to topologically incorrect protein	thca	1
GO:0036003~positive regulation of transcription from RNA polymerase II promoter in response to stress	thca	1
GO:0036056~filtration diaphragm	kirp	1
GO:0036057~slit diaphragm	kirp	1
GO:0036211~protein modification process	stad	1
GO:0036379~myofilament	hnsc	1
GO:0036462~TRAIL-activated apoptotic signaling pathway	thca	1
GO:0036465~synaptic vesicle recycling	kirc	1
GO:0036473~cell death in response to oxidative stress	kirc	1
GO:0036498~IRE1-mediated unfolded protein response	hnsc	1
GO:0036499~PERK-mediated unfolded protein response	thca	1
GO:0036500~ATF6-mediated unfolded protein response	thca	1
GO:0036503~ERAD pathway	prad	1
GO:0038061~NIK/NF-kappaB signaling	stad	1
GO:0039692~single stranded viral RNA replication via double stranded DNA intermediate	lihc	1
GO:0040001~establishment of mitotic spindle localization	brca	1
GO:0042026~protein refolding	stad	1
GO:0042148~strand invasion	brca	1
GO:0042158~lipoprotein biosynthetic process	stad	1
GO:0042169~SH2 domain binding	brca	1
GO:0042276~error-prone translesion synthesis	hnsc	1
GO:0042306~regulation of protein import into nucleus	kirc	1
GO:0042383~sarcolemma	prad	1
GO:0042391~regulation of membrane potential	cesc	1
GO:0042403~thyroid hormone metabolic process	thca	1
GO:0042558~pteridine-containing compound metabolic process	lihc	1
GO:0042578~phosphoric ester hydrolase activity	ucec	1
GO:0042627~chylomicron	lihc	1
GO:0042632~cholesterol homeostasis	lihc	1
GO:0042730~fibrinolysis	lihc	1
GO:0042771~intrinsic apoptotic signaling pathway in response to DNA damage by p53 class mediator	brca	1
GO:0042990~regulation of transcription factor import into nucleus	stad	1
GO:0042991~transcription factor import into nucleus	stad	1
GO:0042993~positive regulation of transcription factor import into nucleus	luad	1
GO:0043153~entrainment of circadian clock by photoperiod	brca	1
GO:0043154~negative regulation of cysteine-type endopeptidase activity involved in apoptotic process	hnsc	1
GO:0043207~response to external biotic stimulus	hnsc	1
GO:0043218~compact myelin	kirc	1
GO:0043292~contractile fiber	cesc	1
GO:0043457~regulation of cellular respiration	kirc	1
GO:0043462~regulation of ATPase activity	kirc	1
GO:0043467~regulation of generation of precursor metabolites and energy	stad	1
GO:0043484~regulation of RNA splicing	stad	1
GO:0043534~blood vessel endothelial cell migration	kirc	1
GO:0043555~regulation of translation in response to stress	hnsc	1
GO:0043621~protein self-association	stad	1
GO:0043623~cellular protein complex assembly	kirc	1
GO:0043632~modification-dependent macromolecule catabolic process	brca	1
GO:0043648~dicarboxylic acid metabolic process	kirc	1
GO:0043967~histone H4 acetylation	luad	1
GO:0043995~histone acetyltransferase activity (H4-K5 specific)	hnsc	1
GO:0043996~histone acetyltransferase activity (H4-K8 specific)	hnsc	1
GO:0044341~sodium-dependent phosphate transport	kirc	1
GO:0044421~extracellular region part	kirc	1
GO:0044430~cytoskeletal part	hnsc	1
GO:0044449~contractile fiber part	cesc	1
GO:0044614~nuclear pore cytoplasmic filaments	brca	1
GO:0044711~single-organism biosynthetic process	lihc	1
GO:0044724~single-organism carbohydrate catabolic process	kirc	1
GO:0044743~intracellular protein transmembrane import	luad	1
GO:0044765~single-organism transport	kirc	1
GO:0044766~multi-organism transport	brca	1
GO:0044773~mitotic DNA damage checkpoint	hnsc	1
GO:0044774~mitotic DNA integrity checkpoint	hnsc	1
GO:0044801~single-organism membrane fusion	kirc	1
GO:0044877~macromolecular complex binding	stad	1
GO:0045003~double-strand break repair via synthesis-dependent strand annealing	brca	1
GO:0045006~DNA deamination	prad	1
GO:0045017~glycerolipid biosynthetic process	lihc	1
GO:0045022~early endosome to late endosome transport	thca	1
GO:0045070~positive regulation of viral genome replication	luad	1
GO:0045091~regulation of single stranded viral RNA replication via double stranded DNA intermediate	lihc	1
GO:0045177~apical part of cell	kirc	1
GO:0045324~late endosome to vacuole transport	thca	1
GO:0045335~phagocytic vesicle	luad	1
GO:0045619~regulation of lymphocyte differentiation	stad	1
GO:0045732~positive regulation of protein catabolic process	luad	1
GO:0045765~regulation of angiogenesis	kirc	1
GO:0045786~negative regulation of cell cycle	hnsc	1
GO:0045787~positive regulation of cell cycle	hnsc	1
GO:0045807~positive regulation of endocytosis	lihc	1
GO:0045834~positive regulation of lipid metabolic process	lihc	1
GO:0045869~negative regulation of single stranded viral RNA replication via double stranded DNA intermediate	lihc	1
GO:0045930~negative regulation of mitotic cell cycle	hnsc	1
GO:0046031~ADP metabolic process	kirc	1
GO:0046040~IMP metabolic process	brca	1
GO:0046049~UMP metabolic process	kich	1
GO:0046398~UDP-glucuronate metabolic process	brca	1
GO:0046440~L-lysine metabolic process	lihc	1
GO:0046460~neutral lipid biosynthetic process	lihc	1
GO:0046463~acylglycerol biosynthetic process	lihc	1
GO:0046496~nicotinamide nucleotide metabolic process	kirc	1
GO:0046513~ceramide biosynthetic process	luad	1
GO:0046523~S-methyl-5-thioribose-1-phosphate isomerase activity	kirc	1
GO:0046677~response to antibiotic	lusc	1
GO:0046794~transport of virus	brca	1
GO:0046823~negative regulation of nucleocytoplasmic transport	stad	1
GO:0046825~regulation of protein export from nucleus	kirc	1
GO:0046889~positive regulation of lipid biosynthetic process	lihc	1
GO:0046909~intermembrane transport	brca	1
GO:0046931~pore complex assembly	brca	1
GO:0046939~nucleotide phosphorylation	kirc	1
GO:0046966~thyroid hormone receptor binding	kirc	1
GO:0046972~histone acetyltransferase activity (H4-K16 specific)	hnsc	1
GO:0047617~acyl-CoA hydrolase activity	brca	1
GO:0048038~quinone binding	luad	1
GO:0048312~intracellular distribution of mitochondria	kirp	1
GO:0048385~regulation of retinoic acid receptor signaling pathway	thca	1
GO:0048487~beta-tubulin binding	kirc	1
GO:0048519~negative regulation of biological process	stad	1
GO:0048523~negative regulation of cellular process	stad	1
GO:0048599~oocyte development	luad	1
GO:0048857~neural nucleus development	stad	1
GO:0050136~NADH dehydrogenase (quinone) activity	kirc	1
GO:0050661~NADP binding	prad	1
GO:0050691~regulation of defense response to virus by host	hnsc	1
GO:0050750~low-density lipoprotein particle receptor binding	thca	1
GO:0050776~regulation of immune response	kirc	1
GO:0050778~positive regulation of immune response	kirc	1
GO:0050818~regulation of coagulation	lihc	1
GO:0050819~negative regulation of coagulation	lihc	1
GO:0050820~positive regulation of coagulation	lihc	1
GO:0050900~leukocyte migration	thca	1
GO:0051031~tRNA transport	blca	1
GO:0051081~nuclear envelope disassembly	kirc	1
GO:0051091~positive regulation of sequence-specific DNA binding transcription factor activity	luad	1
GO:0051099~positive regulation of binding	thca	1
GO:0051128~regulation of cellular component organization	kirc	1
GO:0051129~negative regulation of cellular component organization	kirc	1
GO:0051223~regulation of protein transport	kirc	1
GO:0051224~negative regulation of protein transport	brca	1
GO:0051225~spindle assembly	luad	1
GO:0051235~maintenance of location	kirc	1
GO:0051246~regulation of protein metabolic process	luad	1
GO:0051248~negative regulation of protein metabolic process	kirc	1
GO:0051258~protein polymerization	kirc	1
GO:0051260~protein homooligomerization	kirc	1
GO:0051293~establishment of spindle localization	brca	1
GO:0051301~cell division	hnsc	1
GO:0051303~establishment of chromosome localization	blca	1
GO:0051306~mitotic sister chromatid separation	hnsc	1
GO:0051347~positive regulation of transferase activity	stad	1
GO:0051427~hormone receptor binding	stad	1
GO:0051437~positive regulation of ubiquitin-protein ligase activity involved in regulation of mitotic cell cycle transition	brca	1
GO:0051457~maintenance of protein location in nucleus	kirc	1
GO:0051604~protein maturation	lihc	1
GO:0051648~vesicle localization	thca	1
GO:0051650~establishment of vesicle localization	thca	1
GO:0051653~spindle localization	brca	1
GO:0051704~multi-organism process	hnsc	1
GO:0051707~response to other organism	hnsc	1
GO:0051784~negative regulation of nuclear division	hnsc	1
GO:0051865~protein autoubiquitination	lusc	1
GO:0051881~regulation of mitochondrial membrane potential	kirc	1
GO:0051893~regulation of focal adhesion assembly	brca	1
GO:0051897~positive regulation of protein kinase B signaling	stad	1
GO:0051904~pigment granule transport	thca	1
GO:0051905~establishment of pigment granule localization	thca	1
GO:0051917~regulation of fibrinolysis	lihc	1
GO:0051918~negative regulation of fibrinolysis	lihc	1
GO:0051984~positive regulation of chromosome segregation	luad	1
GO:0055037~recycling endosome	kich	1
GO:0055038~recycling endosome membrane	kich	1
GO:0055085~transmembrane transport	kirc	1
GO:0055092~sterol homeostasis	lihc	1
GO:0060002~plus-end directed microfilament motor activity	stad	1
GO:0060058~positive regulation of apoptotic process involved in mammary gland involution	kirc	1
GO:0060338~regulation of type I interferon-mediated signaling pathway	luad	1
GO:0060348~bone development	cesc	1
GO:0060575~intestinal epithelial cell differentiation	luad	1
GO:0060589~nucleoside-triphosphatase regulator activity	brca	1
GO:0060590~ATPase regulator activity	kirc	1
GO:0060759~regulation of response to cytokine stimulus	kirc	1
GO:0061045~negative regulation of wound healing	lihc	1
GO:0061711~N(6)-L-threonylcarbamoyladenine synthase	stad	1
GO:0061726~mitochondrion disassembly	kirc	1
GO:0070059~intrinsic apoptotic signaling pathway in response to endoplasmic reticulum stress	hnsc	1
GO:0070160~occluding junction	brca	1
GO:0070201~regulation of establishment of protein localization	kirc	1
GO:0070243~regulation of thymocyte apoptotic process	luad	1
GO:0070265~necrotic cell death	kirc	1
GO:0070301~cellular response to hydrogen peroxide	kirp	1
GO:0070382~exocytic vesicle	kirp	1
GO:0070402~NADPH binding	prad	1
GO:0070566~adenylyltransferase activity	brca	1
GO:0070574~cadmium ion transmembrane transport	luad	1
GO:0070603~SWI/SNF superfamily-type complex	brca	1
GO:0070652~HAUS complex	kirc	1
GO:0070670~response to interleukin-4	stad	1
GO:0070780~dihydrosphingosine-1-phosphate phosphatase activity	kich	1
GO:0070828~heterochromatin organization	stad	1
GO:0070911~global genome nucleotide-excision repair	brca	1
GO:0070925~organelle assembly	lusc	1
GO:0071013~catalytic step 2 spliceosome	kirc	1
GO:0071044~histone mRNA catabolic process	thca	1
GO:0071139~resolution of recombination intermediates	brca	1
GO:0071218~cellular response to misfolded protein	prad	1
GO:0071287~cellular response to manganese ion	kirp	1
GO:0071353~cellular response to interleukin-4	stad	1
GO:0071361~cellular response to ethanol	stad	1
GO:0071425~hematopoietic stem cell proliferation	lihc	1
GO:0071453~cellular response to oxygen levels	luad	1
GO:0071456~cellular response to hypoxia	luad	1
GO:0071458~integral component of cytoplasmic side of endoplasmic reticulum membrane	kirc	1
GO:0071496~cellular response to external stimulus	thca	1
GO:0071526~semaphorin-plexin signaling pathway	kirc	1
GO:0071556~integral component of lumenal side of endoplasmic reticulum membrane	kirc	1
GO:0071680~response to indole-3-methanol	luad	1
GO:0071681~cellular response to indole-3-methanol	luad	1
GO:0071712~ER-associated misfolded protein catabolic process	prad	1
GO:0071763~nuclear membrane organization	prad	1
GO:0072021~ascending thin limb development	kirc	1
GO:0072160~nephron tubule epithelial cell differentiation	brca	1
GO:0072182~regulation of nephron tubule epithelial cell differentiation	brca	1
GO:0072218~metanephric ascending thin limb development	kirc	1
GO:0072330~monocarboxylic acid biosynthetic process	kirc	1
GO:0072358~cardiovascular system development	stad	1
GO:0072359~circulatory system development	stad	1
GO:0072383~plus-end-directed vesicle transport along microtubule	lusc	1
GO:0072384~organelle transport along microtubule	kirc	1
GO:0072386~plus-end-directed organelle transport along microtubule	lusc	1
GO:0072521~purine-containing compound metabolic process	kirc	1
GO:0072523~purine-containing compound catabolic process	kirc	1
GO:0072531~pyrimidine-containing compound transmembrane transport	brca	1
GO:0072595~maintenance of protein localization in organelle	luad	1
GO:0072603~interleukin-5 secretion	brca	1
GO:0072611~interleukin-13 secretion	brca	1
GO:0072718~response to cisplatin	brca	1
GO:0075733~intracellular transport of virus	thca	1
GO:0080135~regulation of cellular response to stress	stad	1
GO:0080171~lytic vacuole organization	kirc	1
GO:0086001~cardiac muscle cell action potential	prad	1
GO:0086002~cardiac muscle cell action potential involved in contraction	prad	1
GO:0086003~cardiac muscle cell contraction	prad	1
GO:0086009~membrane repolarization	prad	1
GO:0086064~cell communication by electrical coupling involved in cardiac conduction	ucec	1
GO:0086065~cell communication involved in cardiac conduction	prad	1
GO:0090043~regulation of tubulin deacetylation	kirp	1
GO:0090045~positive regulation of deacetylase activity	kirc	1
GO:0090073~positive regulation of protein homodimerization activity	prad	1
GO:0090109~regulation of cell-substrate junction assembly	brca	1
GO:0090200~positive regulation of release of cytochrome c from mitochondria	kirc	1
GO:0090208~positive regulation of triglyceride metabolic process	lihc	1
GO:0090232~positive regulation of spindle checkpoint	brca	1
GO:0090266~regulation of mitotic cell cycle spindle assembly checkpoint	brca	1
GO:0090267~positive regulation of mitotic cell cycle spindle assembly checkpoint	brca	1
GO:0090307~mitotic spindle assembly	luad	1
GO:0090312~positive regulation of protein deacetylation	brca	1
GO:0090329~regulation of DNA-dependent DNA replication	brca	1
GO:0090398~cellular senescence	thca	1
GO:0090498~extrinsic component of Golgi membrane	blca	1
GO:0090501~RNA phosphodiester bond hydrolysis	lihc	1
GO:0090559~regulation of membrane permeability	kirc	1
GO:0090568~nuclear transcriptional repressor complex	thca	1
GO:0090665~glycoprotein complex	thca	1
GO:0097006~regulation of plasma lipoprotein particle levels	lihc	1
GO:0097061~dendritic spine organization	kirc	1
GO:0097165~nuclear stress granule	luad	1
GO:0097190~apoptotic signaling pathway	kirc	1
GO:0097193~intrinsic apoptotic signaling pathway	kirc	1
GO:0097517~contractile actin filament bundle	brca	1
GO:0097526~spliceosomal tri-snRNP complex	luad	1
GO:0097576~vacuole fusion	ucec	1
GO:0097581~lamellipodium organization	kirc	1
GO:0097632~extrinsic component of pre-autophagosomal structure membrane	kich	1
GO:0098505~G-rich strand telomeric DNA binding	brca	1
GO:0098542~defense response to other organism	hnsc	1
GO:0098553~lumenal side of endoplasmic reticulum membrane	kirc	1
GO:0098554~cytoplasmic side of endoplasmic reticulum membrane	kirc	1
GO:0098590~plasma membrane region	kirc	1
GO:0098609~cell-cell adhesion	stad	1
GO:0098779~mitophagy in response to mitochondrial depolarization	blca	1
GO:0098780~response to mitochondrial depolarisation	blca	1
GO:0098803~respiratory chain complex	kirc	1
GO:0098858~actin-based cell projection	brca	1
GO:0098910~regulation of atrial cardiac muscle cell action potential	luad	1
GO:0098927~vesicle-mediated transport between endosomal compartments	thca	1
GO:0099003~vesicle mediated transport in synapse	lusc	1
GO:0099623~regulation of cardiac muscle cell membrane repolarization	prad	1
GO:1900024~regulation of substrate adhesion-dependent cell spreading	brca	1
GO:1900046~regulation of hemostasis	lihc	1
GO:1900047~negative regulation of hemostasis	lihc	1
GO:1900048~positive regulation of hemostasis	lihc	1
GO:1900063~regulation of peroxisome organization	blca	1
GO:1900180~regulation of protein localization to nucleus	kirc	1
GO:1900221~regulation of beta-amyloid clearance	thca	1
GO:1901292~nucleoside phosphate catabolic process	kirc	1
GO:1901298~regulation of hydrogen peroxide-mediated programmed cell death	luad	1
GO:1901342~regulation of vasculature development	kirc	1
GO:1901653~cellular response to peptide	brca	1
GO:1901663~quinone biosynthetic process	kirp	1
GO:1901681~sulfur compound binding	kirp	1
GO:1901889~negative regulation of cell junction assembly	kirc	1
GO:1901981~phosphatidylinositol phosphate binding	kirc	1
GO:1901985~positive regulation of protein acetylation	brca	1
GO:1901988~negative regulation of cell cycle phase transition	hnsc	1
GO:1901998~toxin transport	kirc	1
GO:1902036~regulation of hematopoietic stem cell differentiation	thca	1
GO:1902042~negative regulation of extrinsic apoptotic signaling pathway via death domain receptors	kirc	1
GO:1902186~regulation of viral release from host cell	brca	1
GO:1902275~regulation of chromatin organization	brca	1
GO:1902339~positive regulation of apoptotic process involved in morphogenesis	kirc	1
GO:1902531~regulation of intracellular signal transduction	stad	1
GO:1902533~positive regulation of intracellular signal transduction	stad	1
GO:1902578~single-organism localization	kirc	1
GO:1902579~multi-organism localization	brca	1
GO:1902882~regulation of response to oxidative stress	kirc	1
GO:1902895~positive regulation of pri-miRNA transcription from RNA polymerase II promoter	brca	1
GO:1902969~mitotic DNA replication	lusc	1
GO:1903018~regulation of glycoprotein metabolic process	stad	1
GO:1903046~meiotic cell cycle process	hnsc	1
GO:1903051~negative regulation of proteolysis involved in cellular protein catabolic process	brca	1
GO:1903173~fatty alcohol metabolic process	lihc	1
GO:1903311~regulation of mRNA metabolic process	stad	1
GO:1903319~positive regulation of protein maturation	lihc	1
GO:1903332~regulation of protein folding	brca	1
GO:1903426~regulation of reactive oxygen species biosynthetic process	kirc	1
GO:1903504~regulation of mitotic spindle checkpoint	brca	1
GO:1903519~regulation of mammary gland involution	kirc	1
GO:1903521~positive regulation of mammary gland involution	kirc	1
GO:1903533~regulation of protein targeting	kirc	1
GO:1903828~negative regulation of cellular protein localization	stad	1
GO:1903829~positive regulation of cellular protein localization	kirc	1
GO:1904116~response to vasopressin	brca	1
GO:1904117~cellular response to vasopressin	brca	1
GO:1904294~positive regulation of ERAD pathway	thca	1
GO:1904356~regulation of telomere maintenance via telomere lengthening	brca	1
GO:1904467~regulation of tumor necrosis factor secretion	kirc	1
GO:1904469~positive regulation of tumor necrosis factor secretion	stad	1
GO:1904589~regulation of protein import	kirc	1
GO:1904707~positive regulation of vascular smooth muscle cell proliferation	thca	1
GO:1904747~positive regulation of apoptotic process involved in development	kirc	1
GO:1904814~regulation of protein localization to chromosome, telomeric region	brca	1
GO:1904816~positive regulation of protein localization to chromosome, telomeric region	luad	1
GO:1904950~negative regulation of establishment of protein localization	brca	1
GO:1905202~methylcrotonoyl-CoA carboxylase complex	prad	1
GO:1905269~positive regulation of chromatin organization	brca	1
GO:1990440~positive regulation of transcription from RNA polymerase II promoter in response to endoplasmic reticulum stress	thca	1
GO:1990459~transferrin receptor binding	lihc	1
GO:1990641~response to iron ion starvation	lihc	1
GO:1990774~tumor necrosis factor secretion	kirc	1
GO:1990777~lipoprotein particle	lihc	1
GO:2000058~regulation of protein ubiquitination involved in ubiquitin-dependent protein catabolic process	brca	1
GO:2000114~regulation of establishment of cell polarity	brca	1
GO:2000116~regulation of cysteine-type endopeptidase activity	hnsc	1
GO:2000188~regulation of cholesterol homeostasis	kirc	1
GO:2000189~positive regulation of cholesterol homeostasis	kirc	1
GO:2000279~negative regulation of DNA biosynthetic process	thca	1
GO:2000369~regulation of clathrin-mediated endocytosis	blca	1
GO:2000377~regulation of reactive oxygen species metabolic process	kirc	1
GO:2000615~regulation of histone H3-K9 acetylation	brca	1
GO:2000662~regulation of interleukin-5 secretion	brca	1
GO:2000664~positive regulation of interleukin-5 secretion	brca	1
GO:2000665~regulation of interleukin-13 secretion	brca	1
GO:2000667~positive regulation of interleukin-13 secretion	brca	1
GO:2001233~regulation of apoptotic signaling pathway	kirc	1
GO:2001234~negative regulation of apoptotic signaling pathway	kirc	1
GO:2001236~regulation of extrinsic apoptotic signaling pathway	kirc	1
GO:2001251~negative regulation of chromosome organization	hnsc	1
GO:2001252~positive regulation of chromosome organization	brca	1
