# Supplementary material for: Genomic Positional Dissection of RNA Editomes in Tumor and Normal Samples
Source: Front Genet. 2019 Mar 20;10:211. doi: 10.3389/fgene.2019.00211 (PMC6435843; doi:10.3389/fgene.2019.00211)
Supplement: FIGURE S1 — Histogram of shared RNA editing sites across multiple cancers filtered by four different average RNA editing level: A > 0%, B > 10%, C > 25%, D > 50%. Majority of the RNA editing sites occurs only in 1 or 2 cancers. [file Data_Sheet_1.ZIP › SupplementaryTable6.xlsx]

## Sheet: top10.all
	gene	geneType	num_editing	dens_editing
BLCA.1	MIR548AE2	ncRNA	36	537.31
BLCA.2	MIR548N	ncRNA	34	453.33
BLCA.3	MIR3134	ncRNA	23	310.81
BLCA.4	GCSHP3	pseudo	29	74.17
BLCA.5	HTATSF1P2	pseudo	46	72.9
BLCA.6	SNORD89	snoRNA	6	52.63
BLCA.7	SNORA40	snoRNA	6	49.18
BLCA.8	MGC2752	pseudo	20	34.13
BLCA.9	MIR27A	ncRNA	2	25.64
BLCA.10	MIR3682	ncRNA	2	23.81
BRCA.1	MIR548N	ncRNA	83	1106.67
BRCA.2	MIR548AE2	ncRNA	39	582.09
BRCA.3	MIR3134	ncRNA	30	405.41
BRCA.4	HTATSF1P2	pseudo	62	98.26
BRCA.5	GCSHP3	pseudo	32	81.84
BRCA.6	SNORA40	snoRNA	7	57.38
BRCA.7	SNORD89	snoRNA	6	52.63
BRCA.8	GAS5-AS1	lncRNA	31	44.67
BRCA.9	MGC2752	pseudo	22	37.54
BRCA.10	IBA57	protein_coding	52	36.44
CESC.1	MIR548N	ncRNA	41	546.67
CESC.2	MIR548AE2	ncRNA	32	477.61
CESC.3	MIR3134	ncRNA	8	108.11
CESC.4	GCSHP3	pseudo	29	74.17
CESC.5	HTATSF1P2	pseudo	28	44.37
CESC.6	SNORA40	snoRNA	5	40.98
CESC.7	MGC2752	pseudo	17	29.01
CESC.8	SNORD89	snoRNA	3	26.32
CESC.9	MIR3682	ncRNA	2	23.81
CESC.10	PDDC1	protein_coding	192	18.7
HNSC.1	MIR548N	ncRNA	73	973.33
HNSC.2	MIR548AE2	ncRNA	33	492.54
HNSC.3	MIR3134	ncRNA	9	121.62
HNSC.4	HTATSF1P2	pseudo	53	83.99
HNSC.5	GCSHP3	pseudo	31	79.28
HNSC.6	SNORA40	snoRNA	6	49.18
HNSC.7	SNORD89	snoRNA	5	43.86
HNSC.8	MGC2752	pseudo	19	32.42
HNSC.9	MIR27A	ncRNA	2	25.64
HNSC.10	SPN	protein_coding	200	25.32
KICH.1	MIR3134	ncRNA	40	540.54
KICH.2	MIR548AE2	ncRNA	34	507.46
KICH.3	GCSHP3	pseudo	32	81.84
KICH.4	MIR548N	ncRNA	5	66.67
KICH.5	RPS18P9	pseudo	13	28.26
KICH.6	SNORA40	snoRNA	3	24.59
KICH.7	CYCS	protein_coding	120	22.77
KICH.8	MGC2752	pseudo	12	20.48
KICH.9	PDDC1	protein_coding	206	20.06
KICH.10	GAS5-AS1	lncRNA	13	18.73
KIRC.1	MIR548N	ncRNA	78	1040
KIRC.2	MIR548AE2	ncRNA	37	552.24
KIRC.3	MIR3134	ncRNA	37	500
KIRC.4	HTATSF1P2	pseudo	58	91.92
KIRC.5	GCSHP3	pseudo	32	81.84
KIRC.6	SNORD89	snoRNA	6	52.63
KIRC.7	SNORA40	snoRNA	6	49.18
KIRC.8	GAS5-AS1	lncRNA	26	37.46
KIRC.9	MGC2752	pseudo	21	35.84
KIRC.10	IBA57	protein_coding	47	32.94
KIRP.1	MIR548N	ncRNA	45	600
KIRP.2	MIR548AE2	ncRNA	37	552.24
KIRP.3	MIR3134	ncRNA	25	337.84
KIRP.4	GCSHP3	pseudo	32	81.84
KIRP.5	HTATSF1P2	pseudo	28	44.37
KIRP.6	GAS5-AS1	lncRNA	27	38.9
KIRP.7	MGC2752	pseudo	17	29.01
KIRP.8	RPS18P9	pseudo	13	28.26
KIRP.9	SNORA40	snoRNA	3	24.59
KIRP.10	CYCS	protein_coding	114	21.63
LIHC.1	MIR548AE2	ncRNA	35	522.39
LIHC.2	HTATSF1P2	pseudo	56	88.75
LIHC.3	GCSHP3	pseudo	29	74.17
LIHC.4	SNORA40	snoRNA	5	40.98
LIHC.5	MGC2752	pseudo	17	29.01
LIHC.6	MIR3682	ncRNA	2	23.81
LIHC.7	PDDC1	protein_coding	201	19.57
LIHC.8	SNORD89	snoRNA	2	17.54
LIHC.9	TMPO	protein_coding	49	14.2
LIHC.10	CYCS	protein_coding	66	12.52
LUAD.1	MIR548N	ncRNA	77	1026.67
LUAD.2	MIR548AE2	ncRNA	35	522.39
LUAD.3	MIR3134	ncRNA	27	364.86
LUAD.4	HTATSF1P2	pseudo	56	88.75
LUAD.5	GCSHP3	pseudo	31	79.28
LUAD.6	SNORA40	snoRNA	6	49.18
LUAD.7	SNORD89	snoRNA	5	43.86
LUAD.8	MGC2752	pseudo	19	32.42
LUAD.9	SPN	protein_coding	241	30.51
LUAD.10	MIR548W	ncRNA	2	27.03
LUSC.1	MIR548N	ncRNA	67	893.33
LUSC.2	MIR548AE2	ncRNA	33	492.54
LUSC.3	HTATSF1P2	pseudo	56	88.75
LUSC.4	GCSHP3	pseudo	31	79.28
LUSC.5	SNORA40	snoRNA	7	57.38
LUSC.6	MIR3134	ncRNA	3	40.54
LUSC.7	MGC2752	pseudo	20	34.13
LUSC.8	SPN	protein_coding	210	26.59
LUSC.9	SNORD89	snoRNA	3	26.32
LUSC.10	MIR27A	ncRNA	2	25.64
PRAD.1	MIR548AE2	ncRNA	38	567.16
PRAD.2	MIR548N	ncRNA	35	466.67
PRAD.3	MIR3134	ncRNA	20	270.27
PRAD.4	HTATSF1P2	pseudo	54	85.58
PRAD.5	GCSHP3	pseudo	32	81.84
PRAD.6	NUDT4P1	protein_coding	21	38.46
PRAD.7	MGC2752	pseudo	20	34.13
PRAD.8	SNORA40	snoRNA	4	32.79
PRAD.9	RPS18P9	pseudo	13	28.26
PRAD.10	LPP	protein_coding	79	27.7
STAD.1	MIR3134	ncRNA	34	459.46
STAD.2	MIR1256	ncRNA	11	92.44
STAD.3	HTATSF1P2	pseudo	55	87.16
STAD.4	GCSHP3	pseudo	32	81.84
STAD.5	SNORA40	snoRNA	4	32.79
STAD.6	SNORD89	snoRNA	3	26.32
STAD.7	MIR27A	ncRNA	2	25.64
STAD.8	MIR3682	ncRNA	2	23.81
STAD.9	FAM133DP	pseudo	16	23.15
STAD.10	CYCS	protein_coding	112	21.25
THCA.1	MIR548N	ncRNA	72	960
THCA.2	MIR548AE2	ncRNA	39	582.09
THCA.3	MIR3134	ncRNA	21	283.78
THCA.4	HTATSF1P2	pseudo	52	82.41
THCA.5	GCSHP3	pseudo	31	79.28
THCA.6	MGC2752	pseudo	20	34.13
THCA.7	SNORA40	snoRNA	4	32.79
THCA.8	GAS5-AS1	lncRNA	22	31.7
THCA.9	RPS18P9	pseudo	14	30.43
THCA.10	MIR548H4	ncRNA	3	27.03
UCEC.1	GCSHP3	pseudo	21	53.71
UCEC.2	SNORA40	snoRNA	4	32.79
UCEC.3	MGC2752	pseudo	16	27.3
UCEC.4	PDDC1	protein_coding	198	19.28
UCEC.5	STK4	protein_coding	28	10.73
UCEC.6	MRI1	protein_coding	100	10.26
UCEC.7	MRPS16	protein_coding	39	10.13
UCEC.8	METTL7A	protein_coding	82	9.06
UCEC.9	HILPDA	protein_coding	22	8.56
UCEC.10	ACBD7	protein_coding	89	7.91
